# Supplementary material
Source: HighWire-hosted journal article supplement (https://gut.bmj.com/content/70/6/1117)
Supplement: inline-supplementary-material-4 [file inline-supplementary-material-4.xlsx]

## Sheet: Sheet1
Brachyspira proteins identified by proteomics						No	No	No	No	No	No	No	No	No	No	No	No	No	No	No	No	No	No	No	No	No	No	No	No	No	No	No	No	No	Yes	Yes	Yes	Yes	Yes	Yes
Protein names	Gene names	Majority Uniprot accession IDs	Peptides	Belongs to protein group altered in samples positive for Brachyspira in the MS analysis (Fig 4A)	Belongs to protein group altered in samples from spirochetosis patients (Fig 4C)	Healthy 1	Healthy 2	Healthy 3	Healthy 4	Healthy 5	Healthy 6	Healthy 7	Healthy 8	Healthy 9	Healthy 10	Healthy 11	IBS 1	IBS 2	IBS 3	IBS 4	IBS 5	IBS 6	IBS 7	Mucus-assoc Brachyspira 1a	Mucus-assoc Brachyspira 1b	Mucus-assoc Brachyspira 2	Mucus-assoc Brachyspira 3	Membrane-assoc Brachyspira 1	Membrane-assoc Brachyspira 2a	Membrane-assoc Brachyspira 2b	Membrane-assoc. Brachyspira 2c	Membrane-assoc Brachyspira 3a	Membrane-assoc Brachyspira 3b	Membrane-assoc Brachyspira 3c	Membrane-assoc Brachyspira 4a	Membrane-assoc Brachyspira 4b	Membrane-assoc Brachyspira 5	Membrane-assoc Brachyspira 6a	Membrane-assoc Brachyspira 6b	Membrane-assoc Brachyspira 7
Alpha-1B-glycoprotein	A1BG	P04217	12			0	0.000279337	0	0	0.000195431	4.66965e-05	0.000538963	8.3453e-05	0	5.81834e-05	1.82779e-05	0	6.75168e-05	7.63409e-05	0	0.000101756	5.50075e-05	4.78872e-05	4.3332e-05	7.16584e-05	4.66531e-05	5.36348e-05	1.93519e-06	0.000216686	0	0	0	0	0	0	2.52206e-05	0	3.63605e-05	9.65743e-05	0.000143968
Alpha-2-macroglobulin	A2M	P01023	60			2.87232e-05	0.00036167	0	0	0.000128688	7.94165e-05	0.00011791	0	0	0	0.00158052	0	4.59111e-05	0	0	5.7077e-05	0	8.34328e-05	0.000350513	0	0.00173838	0.00134116	0.00118632	0.00374026	0	6.73721e-06	0	0	0.000167742	8.56572e-05	0.000184488	0	0	0.00087317	0.00236112
Alanine--tRNA ligase, cytoplasmic	AARS	P49588	5			0	0	0	0	0	0	0	0	0	0	0	0	0	0	0	0	0	0	0	0	0	0	0	0	0	1.34162e-05	0	0	0	0	0	0	0	0	0
Multidrug resistance protein 1	ABCB1	P08183	12			0	0	0	4.36541e-05	0	6.40461e-05	0	0	0	0	5.53684e-06	0	0	3.29475e-05	0	0	0	3.28591e-05	0	0.000182304	0	0	0	0	0	0.000497397	0.000184348	0	9.97973e-05	6.83616e-05	0	0	0	0	0
Canalicular multispecific organic anion transporter 2	ABCC3	O15438	5			0	0	0	0	0	0	0	0	0	0	8.42292e-06	0	0	0	0	0	0	0	2.02924e-05	0	0	0	0	0	0	2.55449e-05	1.57037e-05	0	2.50371e-05	1.45653e-05	6.48407e-06	0	0	0	0
ATP-binding cassette sub-family D member 3	ABCD3	P28288	2			0	0	0	0	0	0	0	0	0	0	0	0	0	0	0	0	0	0	0	0	0	0	0	0	0	6.08364e-06	0	0	0	0	0	0	0	7.70725e-06	0
ATP-binding cassette sub-family F member 1	ABCF1	Q8NE71	2			0	0	0	0	0	0	0	0	0	0	0	0	0	0	0	0	0	0	0	0	0	0	0	0	0	0	0	0	0	0	0	0	0	1.26704e-05	0
Alpha/beta hydrolase domain-containing protein 11	ABHD11	Q8NFV4	3			0	1.33773e-05	0	2.435e-05	0	2.18469e-05	0	0	0	0	0	0	0	2.21631e-05	0	0	0	9.38071e-06	0	0	0	0	0	0	0	0	0	0	0	2.86525e-05	0	0	0	0	0
Alpha/beta hydrolase domain-containing protein 14B	ABHD14B	Q96IU4	3			0	1.27212e-05	0	0	0	7.64862e-06	0	0	0	0	1.72312e-05	0	0	6.93032e-06	0	0	0	0	3.43396e-05	0	1.38594e-05	0	5.94627e-05	4.6159e-05	0	3.65233e-05	0	0	0	0	3.68522e-05	0	0	7.45048e-05	4.84484e-05
Abl interactor 1	ABI1	Q8IZP0	9			0	1.99112e-05	8.84707e-05	0	0	4.48765e-05	3.90015e-05	7.8889e-05	9.9952e-05	0	6.44198e-06	0	1.9058e-05	0	0	9.18632e-05	0	1.89157e-05	0	0	1.18452e-05	0	0	0	0	0	3.40271e-05	0	0	3.49881e-05	0	0	7.44684e-05	0	0
Costars family protein ABRACL	ABRACL	Q9P1F3	3			0	0	0	0	0	1.50732e-05	0	0	0	0	1.03231e-05	0	0	0	0	0	0	0	0	0	1.93891e-06	0	2.05958e-05	8.63351e-06	0	0	0	0	0	0	0	0	0	1.99035e-05	0
3-ketoacyl-CoA thiolase, peroxisomal	ACAA1	P09110	22			0	0.000142818	0.000196504	0.000484673	7.50479e-05	0.000496869	4.38635e-05	0.000325133	0	0	0.000172905	0	5.59054e-05	0.000121359	0	0.000337227	5.55282e-05	0.00027991	1.75599e-06	0	0.000114235	0	0.000161978	9.91477e-05	0	0.000172908	0	0	0.000574855	0.000284167	0	0.00026515	0.000860972	0.000168249	1.75568e-05
3-ketoacyl-CoA thiolase, mitochondrial	ACAA2	P42765	28			0	0.000296975	0	7.65707e-05	0.000292763	0.00173537	0.000292745	0.000520597	5.50428e-05	0	0.000850482	0	0.000219997	0.000912645	0	0.000322405	0	0.000655559	0.000738764	0	0.000663652	7.71698e-06	0.000675881	0.000560237	0	0.00242864	0	6.13718e-05	0.00188684	0.000487132	0.000240468	0.000379867	0.000751382	0.00055045	0.000606163
Medium-chain specific acyl-CoA dehydrogenase, mitochondrial	ACADM	P11310	17			7.72039e-05	7.81695e-05	0	9.84298e-05	8.71468e-05	0.000169268	0	0.000124482	4.05356e-05	0	0.000134378	0	2.6655e-05	6.52853e-05	0	0.000115841	3.99125e-05	6.7876e-05	9.49984e-05	0	0.000129563	0	0.00024021	3.72085e-05	0	3.12907e-05	3.67041e-05	0	0.00037707	2.16417e-05	0	0.000105884	9.66284e-05	0.000116633	0
Short-chain specific acyl-CoA dehydrogenase, mitochondrial	ACADS	P16219	11			0	4.20371e-05	0.000162493	0.000161619	6.56226e-05	0.000123759	9.18041e-05	5.28612e-05	0.000109317	0	0.000270178	0.00015119	0	9.08784e-05	0	0.000117111	9.33642e-05	7.3912e-05	0.000225175	0	0.000127033	0	0.000248361	0.000177531	0	0.000492912	0.000114984	0	0.000330001	0.000108098	0.000124941	2.6878e-05	4.02146e-05	0.000137788	0.000147461
Short/branched chain specific acyl-CoA dehydrogenase, mitochondrial	ACADSB	P45954	4			0	0	0	0	0	8.72343e-06	0	0	0	0	9.41664e-06	0	0	0	0	0	0	0	0	0	6.12355e-06	0	0	1.09533e-05	0	4.65845e-05	0	0	9.05396e-06	0	0	0	0	0	0
Very long-chain specific acyl-CoA dehydrogenase, mitochondrial	ACADVL	P49748	24			0.000128395	0.000158277	0	0.000186322	0	0.000123594	0	1.28698e-05	0	0	0.000165676	0	0.000180541	0.000184503	0	0.000222904	0	0.000102629	7.68889e-05	0	5.98119e-05	0	0.000239625	0.00023412	0	0.000840338	0.000132313	0	0.000416077	7.99723e-05	8.90261e-05	0	1.7952e-05	0.000306541	0.000116321
Arf-GAP with coiled-coil, ANK repeat and PH domain-containing protein 1	ACAP1	Q15027	1			0.000572026	0.000340612	0	0.000286341	0.000350687	0.000374543	0.000276881	0.000506851	0.000903968	0	9.97294e-05	0.000129954	0.000633125	0.000273807	0.00064148	0.000544616	0.000446868	0.000378699	7.61041e-05	0	0.00014118	0	0.000119307	8.80679e-05	0.000197738	0.000124297	4.60745e-05	0	7.5936e-05	0.000378266	5.76757e-05	0.000462741	0.000638072	8.91443e-05	5.60391e-05
Acetyl-CoA acetyltransferase, mitochondrial	ACAT1	P24752	23			0.000293345	0.000648729	0.00104694	0.00104294	0.000951676	0.00172175	0.00101757	0.0014569	0.000838645	9.689e-05	0.00120466	0.00114193	0.00053399	0.00109551	0	0.00233734	0.00141687	0.00158534	0.000327463	0.000330679	0.000894981	2.50982e-05	0.0013222	0.000548677	0.000467055	0.0014527	0.00116249	0	0.00117053	0.000827568	0.00021223	0.000941523	0.00164138	0.000791308	0.000612464
Acetyl-CoA acetyltransferase, cytosolic	ACAT2	Q9BWD1	4		Butyrate metabolism	0	0	0	0	0	0	0	0	0	0	0	0	0	0	0	1.23661e-05	0	0	0	0	1.10941e-05	0	5.2144e-05	3.89356e-06	0	3.74515e-05	0	0	0	0	0	0	0.000107002	0.000101305	2.59735e-05
Golgi resident protein GCP60	ACBD3	Q9H3P7	4			0	0	0	0	0	2.73294e-06	0	0	0	0	0	0	0	0	0	0	0	0	3.46084e-05	0	3.04896e-05	0	0	2.43844e-05	0	1.77375e-05	0	0	3.18318e-05	0	0	0	0	2.90815e-05	0
Apoptotic chromatin condensation inducer in the nucleus	ACIN1	Q9UKV3	9			3.97849e-05	0	5.40816e-05	4.08784e-05	0	9.35487e-06	0	2.25449e-05	0	0	7.37762e-06	0	1.95301e-05	0	0	0	7.21905e-05	0	0	0	1.16982e-05	0	0	0	0	0	5.74642e-05	0	0	1.83535e-05	7.04247e-06	0	4.30513e-06	0	0
ATP-citrate synthase	ACLY	P53396	7			0	1.35267e-05	0	0	0	3.65375e-05	0	1.18074e-05	0	0	0	0	0	0	0	0	0	9.3549e-06	0	0	0	0	1.0313e-05	0	0	0	0	0	0	0	0	0	4.0373e-05	0	0
Cytoplasmic aconitate hydratase	ACO1	P21399	6			0	0	0	0	0	0	0	0	0	0	9.24269e-06	0	0	0	0	0	0	0	0	0	0	0	5.22445e-06	0	0	0	0	0	0	0	0	0	0	2.20133e-05	0
Aconitate hydratase, mitochondrial	ACO2	Q99798	49			0	0.000808886	0	0.00198453	0.000817609	0.00228592	0.000923038	0.00120871	0.000891549	0.000559961	0.00235294	0.000556626	0.000436378	0.00147108	0	0.00174632	0.00150379	0.00224682	0.000551176	0.000578302	0.00140168	4.4412e-05	0.00256242	0.000932126	0.00121102	0.00329798	0.00110046	0	0.00265435	0.00111347	0.000224607	0.000831712	0.000885557	0.00109707	0.000383573
Acyl-coenzyme A thioesterase 1;Acyl-coenzyme A thioesterase 2, mitochondrial	ACOT1;ACOT2	Q86TX2;P49753	4			0	3.61135e-05	0	6.11519e-05	0	9.24462e-05	3.19046e-05	4.0674e-05	0	0	0	0	0	0.00018503	0	6.56648e-05	0	0.000127413	0	0	0	0	0	2.14115e-06	0	0	0	0	0	3.53385e-05	0	0	4.68039e-05	0	0
Acyl-coenzyme A thioesterase 13;Acyl-coenzyme A thioesterase 13, N-terminally processed	ACOT13	Q9NPJ3	5			0	0	0	0	0	6.24896e-05	0	4.09902e-05	0	0	0.000134322	0	5.99077e-05	7.0108e-05	0	2.09081e-05	0	3.51449e-05	0	0	4.56714e-05	0	0.000205806	0.00011133	0	0.000119825	0	0	0.0001329	3.69517e-05	0	3.26278e-05	3.20394e-05	1.41658e-05	0
Cytosolic acyl coenzyme A thioester hydrolase	ACOT7	O00154	2			0	0	0	0	0	0	0	0	0	0	0	0	0	0	0	0	0	0	0	0	0	0	0	0	0	0	0	0	0	0	0	0	0	1.081e-05	0
Peroxisomal acyl-coenzyme A oxidase 1	ACOX1	Q15067	10			0	0	0	0	0	1.52241e-05	0	0	0	0	3.07989e-06	0	0	0	0	0	0	0	0	0	1.31259e-06	0	3.65416e-05	3.57993e-06	0	9.54763e-06	0	0	0.000103328	2.15889e-05	0	0	0	3.85179e-06	0
Low molecular weight phosphotyrosine protein phosphatase	ACP1	P24666	3			0	4.05635e-05	0	0	0	0	0	0	0	0	0	0	0	0	0	0	0	2.88893e-05	0	0	0	0	0	0	0	0	0	0	0	0	0	0	0	3.99755e-05	0
Acyl-CoA synthetase family member 2, mitochondrial	ACSF2	Q96CM8	9			0	3.71811e-05	0	6.95467e-05	8.45891e-05	0.000127108	0	2.35552e-05	5.34376e-05	0	3.72966e-05	9.89845e-05	4.8714e-05	0	0	0.000219791	6.81518e-05	0	4.75013e-05	0	0	0	3.36657e-05	2.54328e-05	0.000114711	0.00023164	8.60904e-05	0	5.34938e-05	0	5.66976e-05	3.6464e-05	5.23949e-05	8.34261e-06	2.18424e-05
Long-chain-fatty-acid--CoA ligase 5	ACSL5	Q9ULC5	11			0	3.43324e-05	0	0	0	6.12456e-05	2.46198e-05	4.19045e-05	0	0	6.62375e-05	0	0	3.12879e-05	0	0	0	3.80666e-05	5.45434e-05	0	2.58098e-05	0	0.000108162	5.9717e-05	0	0.000247505	7.11029e-05	0	0.000143184	8.0864e-05	0	0	1.19057e-05	0.000162405	8.50924e-05
Acetyl-coenzyme A synthetase 2-like, mitochondrial	ACSS1	Q9NUB1	2			0	0	0	0	0	9.47279e-06	0	0	0	0	0	0	0	0	0	0	0	0	0	0	0	0	0	0	0	0	0	0	0	0	0	0	0	0	0
Acetyl-coenzyme A synthetase, cytoplasmic	ACSS2	Q9NR19	3			0	0	0	0	0	1.88837e-05	0	0	0	0	0	0	0	0	0	0	0	0	0	0	0	0	0	8.23803e-06	0	0	0	0	0	0	0	0	2.28996e-05	0	0
Actin, cytoplasmic 1;Actin, cytoplasmic 1, N-terminally processed	ACTB	P60709	42			0.0141015	0.0394458	0.0232921	0.0311725	0.0195972	0.0421774	0.024418	0.0263262	0.0207615	0.0735835	0.015856	0.0260579	0.0229829	0.0349477	0.0102346	0.0344474	0.016065	0.0279681	0.0146125	0.0195023	0.016484	0.00605603	0.0236369	0.0156474	0.0139617	0.0335957	0.0129191	0.00533915	0.0145722	0.0245074	0.0181096	0.0128425	0.0332522	0.0272022	0.0181904
Beta-actin-like protein 2	ACTBL2	Q562R1	11			0	0	0	0	0	0	0	0	0	0	0	0	0	0	0.0040079	0	0	0	0	0	0	0	0	0	0	0	0	0	0	0	0	0	0	0	0
Actin, alpha cardiac muscle 1;Actin, aortic smooth muscle;Actin, alpha skeletal muscle;Actin, gamma-enteric smooth muscle	ACTC1;ACTA2;ACTA1;ACTG2	P68032;P62736;P68133;P63267	36			0	0.000102011	0	0	0	3.67792e-05	0	0	0	0.0158206	0.00137193	0	0	0	0	0	8.85426e-05	0	0	0	0.00223312	0.000171368	0.00136261	0.00231648	0	3.19288e-05	0	0	0.00149132	7.99736e-06	0	0	0	0.00188937	7.48066e-05
Actin, cytoplasmic 2;Actin, cytoplasmic 2, N-terminally processed	ACTG1	P63261	42			0	0	0	0	0	0.000273052	4.1068e-05	0.000270902	0	0	4.3399e-05	0	0	0.000544815	0	0	0	3.89784e-05	0	0	6.05358e-05	6.59892e-06	2.25073e-05	4.56949e-05	0	2.16515e-06	0	0	8.88548e-05	0.000394927	3.52384e-06	0.00016176	0.000232768	2.14929e-05	9.39693e-07
Alpha-actinin-1	ACTN1	P12814	41			5.18894e-05	4.02992e-05	0	0.000104237	7.41588e-05	5.99308e-05	7.92332e-05	9.59732e-05	0	0.000658504	7.33997e-05	0.000105893	0.000113967	0	0	0	0.000166312	3.02122e-05	0	0	8.42118e-05	1.88464e-05	2.70877e-05	0.000112765	0	2.10741e-05	0.000113658	0	1.38606e-05	0.000115261	7.02904e-06	2.44248e-05	2.3561e-05	6.63344e-05	0
Alpha-actinin-4	ACTN4	O43707	80			0.00138239	0.00255239	0.000287661	0.00206324	0.00167007	0.00527185	0.000991789	0.00257313	0.000757361	0	0.00251145	0.000552024	0.0016587	0.00145531	0	0.00260505	0.000452324	0.00253035	0.00211065	0	0.00243043	0.000423746	0.00436978	0.0019676	0	0.00423382	0.00113323	0.000429351	0.001506	0.00425129	0.00144757	0.000651226	0.00228225	0.00458696	0.00262237
Alpha-centractin	ACTR1A	P61163	4			0	0	0	0	0	0	0	0	0	0	0	0	0	0	0	0	0	0	0	0	4.88086e-06	0	6.01153e-05	0	0	0	0	0	0	0	0	0	0	1.09691e-05	0
Actin-related protein 2	ACTR2	P61160	9	Arp2/3 complex; bacterial adhesion	Arp2/3 complex; bacterial adhesion	0	1.15945e-05	0	0	0	6.68584e-05	0	1.91028e-05	0	0	3.34816e-05	0	0	1.17615e-05	0	0	0	3.97288e-05	2.99531e-05	0	7.75693e-06	0	0.000235158	3.5217e-05	0	0.000223183	0	0	4.03576e-05	2.1902e-05	8.82754e-05	0	6.23197e-05	0.000147965	0.00012995
Actin-related protein 3	ACTR3	P61158	12	Arp2/3 complex; bacterial adhesion	Arp2/3 complex; bacterial adhesion	0	0	0	0	0	9.90613e-05	0	0	0	0	1.85716e-05	0	0	2.07181e-05	0	0	0	0	4.03904e-05	0	4.30314e-05	0	2.03349e-05	9.57976e-05	0	0.000208114	0	0	5.84793e-05	7.4625e-05	8.7911e-05	0	4.24068e-05	0.000180147	0.000104017
Aminoacylase-1	ACY1	Q03154	2			0	0	0	0	0	0	0	0	0	0	0	0	0	0	0	0	0	0	0	0	0	0	0	0	0	0	0	0	0	0	0	0	0	0	0
Disintegrin and metalloproteinase domain-containing protein 10	ADAM10	O14672	3			0	0	0	2.47255e-05	0	0	0	0	0	0	0	0	0	0	0	2.32304e-05	0	0	0	0	0	0	0	0	0	0	0	0	0	0	0	0	0	0	0
Atypical kinase ADCK3, mitochondrial	ADCK3	Q8NI60	1			0	0	0	0	0	4.21568e-06	0	0	0	0	1.03024e-06	0	0	0	0	0	0	0	0	0	1.67837e-06	0	0	0	0	0	0	0	0	0	0	0	0	0	0
Alpha-adducin	ADD1	P35611	6			0.000199309	4.34916e-05	0	4.89079e-05	0	8.55481e-05	3.46961e-05	7.39606e-05	0.000121479	9.19536e-05	6.3006e-06	0.000133725	6.61109e-05	8.98674e-05	0	2.06452e-05	8.80389e-05	8.17143e-05	0	0	0	0	3.15256e-05	6.78968e-06	0	0	6.43588e-05	0	0	4.87892e-05	0	0	0	1.01232e-05	0
Gamma-adducin	ADD3	Q9UEY8	4			0	0	0	0	0	0	0	9.79855e-06	0	0	1.28486e-05	0	0	0	0	0	0	0	0	0	1.62543e-05	0	1.26266e-05	0	0	2.69194e-05	0	0	1.44338e-05	5.29099e-06	0	0	0	1.69777e-05	1.05137e-05
Alcohol dehydrogenase 1B	ADH1B	P00325	14			0	0	0	0	0	0	0	0	0	0	4.65806e-05	0	0	0	0	0	0	0	0	0	0	0	8.144e-05	9.91787e-05	0	0	0	0	0	0	0	0	0	7.09027e-05	2.12088e-05
Alcohol dehydrogenase 1C	ADH1C	P00326	17			0	0.000328502	0	0	0	0.000286294	0	0	0	0	0.000397186	0	0	0.000383407	0	4.46661e-05	0	0	7.29604e-05	0	0.000328468	0	0.000813987	0.00027271	0	0.000587724	0	0.000157275	2.41641e-05	0	0.000365179	0	3.89827e-05	0.000703671	0.000240584
Alcohol dehydrogenase class-3	ADH5	P11766	14			0	0.000261112	0	0	0	0.000190735	0	3.12671e-05	0	0	0.00012313	0	0	0	0	9.25914e-05	0	0	0.000147781	0	0.000110194	1.07769e-05	3.40353e-05	0.000136376	0	7.56885e-05	0	0	9.52074e-06	1.64542e-05	3.10463e-05	0	0.000202689	0.000202117	2.14849e-05
Adipogenesis regulatory factor	ADIRF	Q15847	3			0	0	0	0	0	2.32542e-05	0	6.06138e-05	0	0	2.90397e-05	0	0	0	0	0	0	0	0	0	7.14957e-05	4.99834e-05	5.29343e-05	4.03674e-05	0	0	0	0	0	0	0	0	0	0	0
Poly(ADP-ribose) glycohydrolase ARH3	ADPRHL2	Q9NX46	2			0	1.09304e-05	0	1.43873e-05	0	0	0	0	0	0	0	0	0	0	0	0	0	5.61797e-06	0	0	0	0	0	0	0	0	0	0	0	0	0	0	0	0	0
Proteasomal ubiquitin receptor ADRM1	ADRM1	Q16186	5			0	0	0	0	0	1.44241e-05	0	0	0	0	0	0	0	0	0	0	0	0	0	0	8.32799e-06	0	0	0	0	2.74795e-05	0	0	1.05684e-05	0	0	0	9.20274e-06	2.3986e-05	0
AFG3-like protein 2	AFG3L2	Q9Y4W6	15			0	0	0	0	0	8.10319e-06	0	0	0	0	5.6225e-05	0	0	0.000114771	0	0.000142564	0.000127698	2.00679e-05	1.53647e-05	0	7.16523e-06	0	1.41995e-05	1.51987e-05	0	0.000168947	0.000103023	0	4.48695e-05	0	0	0	0	3.82149e-05	0
Afamin	AFM	P43652	2			0	0	0	0	0	0	0	0	0	0	6.5699e-06	0	0	0	0	0	0	0	0	0	1.1593e-05	0	0	5.35653e-05	0	0	0	0	0	0	0	0	0	0	0
Arf-GAP domain and FG repeat-containing protein 1	AGFG1	P52594	2			0	0	0	0	0	0	0	1.93658e-05	0	0	0	0	0	0	0	0	0	0	0	0	0	0	0	0	0	0	0	0	0	0	0	0	0	0	0
Agmatinase, mitochondrial	AGMAT	Q9BSE5	3			0	0	0	0	0	2.76855e-05	0	8.58358e-06	0	0	0	0	0	0	0	0	0	8.20318e-06	0	0	0	0	0	0	0	0	0	0	0	9.7085e-06	0	0	5.04605e-05	0	0
Alkyldihydroxyacetonephosphate synthase, peroxisomal	AGPS	O00116	3			0	0	0	0	0	0	0	0	0	0	0	0	0	0	0	0	0	1.4059e-05	0	0	0	0	6.12545e-06	0	0	0	0	0	0	0	0	0	0	1.09544e-05	0
Anterior gradient protein 2 homolog	AGR2	O95994	18			0.0263964	0.00624631	0.010406	0.0146603	0.00734888	0.0104208	0.008362	0.0151524	0.0120704	0.00234293	0.00323003	0.00512286	0.0123377	0.00651118	0.00669566	0.00338359	0.012415	0.00778808	0.00100144	0.00141489	0.00370108	0.000177296	0.00352751	0.00565301	0.0103141	0.00362711	0.00986311	0	0.00391113	0.0106897	0.000860012	0.0126422	0.0247252	0.00511877	0.00153491
Anterior gradient protein 3 homolog	AGR3	Q8TD06	12			0	6.02035e-05	0	0.000157759	5.16548e-05	0.000250206	3.31317e-05	0.000618381	0	0	0.00017234	0	0.00027292	0.000134649	0	2.93848e-05	0	0.00020019	3.13228e-05	0	0.000218684	2.16405e-05	0.000198083	0.000196762	0	0.000233179	6.66106e-05	0	0.000364365	0.000238399	2.48066e-05	0.000239332	0.000398194	0.000170512	1.31295e-05
Agrin;Agrin N-terminal 110 kDa subunit;Agrin C-terminal 110 kDa subunit;Agrin C-terminal 90 kDa fragment;Agrin C-terminal 22 kDa fragment	AGRN	O00468	2			0	0	0	0	0	0	0	0	0	0	0	0	0	0	0	0	0	0	0	0	0	0	0	0	0	0	0	0	0	0	0	0	0	0	0
Angiotensinogen;Angiotensin-1;Angiotensin-2;Angiotensin-3;Angiotensin-4;Angiotensin 1-9;Angiotensin 1-7;Angiotensin 1-5;Angiotensin 1-4	AGT	P01019	2			0	0	0	0	0	0	0	0	0	0	0	0	0	0	0	0	0	0	0	0	5.10429e-05	1.00592e-05	0	4.00608e-05	0	0	0	0	0	0	0	0	0	2.8516e-05	3.82027e-05
Adenosylhomocysteinase	AHCY	P23526	14			0	2.48536e-05	0	1.68982e-05	0	3.39091e-05	0	0	0	0	0.000161412	0	0	0	0	4.50923e-05	0	8.1375e-06	6.57312e-05	0	0.000140273	0	0.000188046	6.53006e-05	0	0.000123817	0	0	0	0	0.000124834	0	7.95068e-05	0.000242192	0.000141384
Putative adenosylhomocysteinase 3;Putative adenosylhomocysteinase 2	AHCYL2;AHCYL1	Q96HN2;O43865	15			0	5.55081e-05	0	3.95226e-05	0	0.000214124	0	6.18777e-05	0	0	4.98845e-05	0	0	3.47004e-05	0	5.35291e-05	0	4.39943e-05	5.40983e-05	0	4.78486e-05	0	6.00196e-05	4.04292e-05	0	0.000164576	0	0	1.32922e-05	2.70857e-05	3.1449e-05	0	9.66939e-05	0.000137552	9.70278e-05
Neuroblast differentiation-associated protein AHNAK	AHNAK	Q09666	293			0.00462712	0.0028756	0.00325053	0.00425581	0.00134834	0.00788387	0.00136642	0.00783838	0.00172311	0.00291071	0.00359261	0.00146081	0.00402577	0.00140416	0.00203457	0.00151769	0.00112007	0.0028119	0.00567173	0.00248919	0.00632063	0.00332042	0.00350575	0.00388119	0.00121922	0.00480104	0.00674968	7.45317e-05	0.0100797	0.00530529	0.00122979	0.00655045	0.0068085	0.00285491	0.0018345
Alpha-2-HS-glycoprotein;Alpha-2-HS-glycoprotein chain A;Alpha-2-HS-glycoprotein chain B	AHSG	P02765	6	Immune response	Immune response	0	1.5541e-05	0	0	0	1.24449e-05	8.90961e-05	0	0	0	0.000228808	0	0	0	0	0	8.30319e-05	0	0.000597234	0	0.000969536	0.00137894	0.000300098	0.00115319	0	1.83919e-05	0	0.000127683	0.000779384	7.10585e-05	0.000557907	0	0	0.000401162	0.000623036
Alpha-hemoglobin-stabilizing protein	AHSP	Q9NZD4	1			0	0	0	0	0	0	0	0	0	0	2.46476e-05	0	0	0	0	0	0	0	0	0	0	0	0	0	0	0	0	0	0	0	0	0	0	0	0
Allograft inflammatory factor 1	AIF1	P55008	2			0	0	0	0	0	0	0	0	0	0	9.2522e-06	0	0	0	0	0	0	0	1.74373e-05	0	2.72246e-05	4.3582e-05	3.06445e-05	0	0	0	0	0	0	0	0	0	0	2.07111e-05	1.38847e-05
Apoptosis-inducing factor 1, mitochondrial	AIFM1	O95831	21			0	4.48857e-05	6.29351e-05	0.000450965	0.000127728	0.00032638	0.000183838	0.000220659	4.87924e-05	0	0.000327003	7.67561e-05	0.000175087	0.000292659	0.000101989	0.000561578	0.000439521	0.000389846	0.000202959	0.000136198	0.000231619	0	0.000389048	0.00020746	0	0.000866334	0.000434426	0	0.000497435	0.000221468	0.000198706	6.61155e-05	0.000130678	0.000300907	0.000179993
Aminoacyl tRNA synthase complex-interacting multifunctional protein 1;Endothelial monocyte-activating polypeptide 2	AIMP1	Q12904	12			7.90197e-05	7.66493e-05	0	5.35554e-05	4.01421e-05	0.000157111	2.46898e-05	0.000300345	0	0	0	6.56127e-05	8.04264e-05	6.39034e-05	0	6.20902e-05	8.48587e-05	6.10854e-06	0	0	2.33073e-05	1.00872e-05	0	1.43251e-05	0	4.12627e-06	0.000154345	0	1.01692e-05	0.000197657	0	0.000191544	0.000237152	1.28857e-05	4.51386e-05
AH receptor-interacting protein	AIP	O00170	1			0	1.33253e-05	0	0	0	1.53922e-05	0	0	0	0	0	0	0	0	0	0	0	6.18858e-06	0	0	0	0	0	0	0	0	0	0	0	0	0	0	1.58073e-05	0	0
Adenylate kinase isoenzyme 1	AK1	P00568	7			0	0	0	0	0	0	0	1.84129e-05	0	0	6.03337e-06	0	0	1.70411e-05	0	0	0	6.89835e-05	0	0	5.1635e-06	0	6.97929e-06	6.95142e-06	0	0	3.80719e-05	0	0	1.79734e-05	0	0	0	7.76869e-06	6.12759e-06
Adenylate kinase 2, mitochondrial;Adenylate kinase 2, mitochondrial, N-terminally processed	AK2	P54819	17			0.000299693	0.000478225	0.000978969	0.000702284	0.00108896	0.000837499	0.000695651	0.000820315	0.000942381	0	0.000238061	0.00106554	0.00127716	0.00083717	0	0.0015672	0.000833466	0.00068743	0.000356513	0.000508833	0.000322635	0	0.000538581	0.000208408	0.000331316	0.000859216	0.00077886	0	0.000151859	0.000606937	0.000300407	0.000580325	0.000483993	8.35888e-05	0.000243215
GTP:AMP phosphotransferase AK3, mitochondrial	AK3	Q9UIJ7	12			0	0	0	0	0.000173205	6.58679e-05	0.000147084	3.27471e-05	7.61794e-05	0	4.48062e-05	0	2.37955e-05	0	0	8.07044e-05	0	0	1.15409e-05	0	3.16272e-05	0	7.67936e-05	0.000171587	0	8.71466e-05	0	0	7.76226e-05	8.02455e-05	0	0	9.43041e-05	0	0
Adenylate kinase 4, mitochondrial	AK4	P27144	6			0	0	0	0	0	8.19163e-05	0	3.23933e-05	0	0	0	0	0	4.63786e-05	0	0	0	2.52067e-05	0	0	0	0	0	1.21088e-05	0	5.7583e-05	0	0	0	1.86807e-05	0	0	2.83448e-05	1.17893e-05	0
A-kinase anchor protein 12	AKAP12	Q02952	3			0	0	0	0	0	0	0	0	0	0	0	0	0	0	0	0	0	0	0	0	0	2.04843e-05	0	0	0	0	0	0	0	0	0	0	0	0	0
Alcohol dehydrogenase [NADP(+)]	AKR1A1	P14550	15			0	0.000101724	0	3.50487e-05	0.000185265	0.000113748	4.68914e-05	6.07328e-05	0	0	3.07161e-05	0	3.05238e-05	8.14695e-05	0	0	0	2.90579e-05	0.000178071	0	0.000211799	0	0.000131628	0.000102627	0	0.000186082	0	0.00010418	0	4.06188e-05	8.8174e-05	0	6.8552e-05	0.000244502	0.000174482
Aldose reductase	AKR1B1	P15121	3			0	0	0	0	0	0	0	0	0	0	0	0	0	0	0	0	0	0	0	0	4.92039e-05	0	1.8e-05	1.47039e-05	0	0	0	0	0	0	0	0	0	0	0
Aldo-keto reductase family 1 member B10	AKR1B10	O60218	7			0	0.000153041	0	8.48978e-05	0.000150231	8.02596e-05	0	5.38214e-05	0	0	1.7043e-05	0	0	0	0	3.97923e-05	0	0	5.1232e-05	0	1.70858e-05	0	1.10392e-05	2.47498e-05	0	8.03944e-05	0	0	0	3.51749e-05	1.58448e-05	0	6.55135e-05	9.30142e-05	3.6782e-05
Aldo-keto reductase family 1 member C3;Aldo-keto reductase family 1 member C1	AKR1C3;AKR1C1	P42330;Q04828	10			0.00031965	0.000273602	0	0.000120805	0.000174158	4.83945e-05	0	0.000211839	0.000248874	0	7.98777e-05	0.000109385	0.00010629	3.57092e-05	0	4.48481e-05	0	6.29006e-05	0.000103943	0	2.83687e-05	0	2.85119e-05	3.88737e-05	0	5.41869e-05	9.46293e-05	0	4.13124e-05	0.000115239	9.11194e-05	8.72554e-05	2.16688e-05	7.98817e-05	0.000130174
3-oxo-5-beta-steroid 4-dehydrogenase	AKR1D1	P51857	2			0.000121521	0.00010488	9.25034e-05	6.17093e-05	0.000205075	2.74084e-05	2.10919e-05	0.000189609	0	0	0	8.59828e-05	4.54844e-05	2.94048e-05	0	3.11934e-05	0	1.79289e-05	0	0	0	0	0	0	0	0	4.20587e-05	0	0	4.04745e-05	0	8.41822e-05	9.56807e-05	2.3409e-05	0
Aflatoxin B1 aldehyde reductase member 2	AKR7A2	O43488	7			0	0.000142472	0	0	0	1.47383e-05	3.14095e-05	6.50443e-05	0	0	0	0	3.17757e-05	0	0	6.11622e-05	0	2.7177e-05	0	0	5.54173e-06	0	0	0	0	0	0	0	0	0	0	0	1.41412e-05	3.2713e-05	0
Aflatoxin B1 aldehyde reductase member 4;Aflatoxin B1 aldehyde reductase member 3	AKR7L;AKR7A3	Q8NHP1;O95154	4			0	3.0582e-05	0	0	0	0	0	0	0	0	0	0	0	1.44479e-05	0	0	0	0	0	0	0	0	0	0	0	0	0	0	0	0	0	0	4.28548e-05	0	0
Delta-aminolevulinic acid dehydratase	ALAD	P13716	1			0	0	0	0	0	0	0	1.74527e-05	0	0	0	0	0	0	0	0	0	1.54766e-05	0	0	0	0	0	0	0	0	0	0	0	5.80974e-05	0	0	0	0	0
Serum albumin	ALB	CON__P02768-1;P02768	90			0.0160099	0.168261	0.0322118	0.0346909	0.104561	0.0306299	0.135713	0.0223925	0.0097278	0.0083886	0.189434	0.0444782	0.0460953	0.0410981	0.038405	0.0586178	0.0369614	0.0357975	0.24399	0.025376	0.17886	0.456445	0.166239	0.284127	0.0909825	0.0568355	0.0264609	0.451324	0.14483	0.0406987	0.219793	0.0266825	0.00547678	0.132769	0.308727
Delta-1-pyrroline-5-carboxylate synthase;Glutamate 5-kinase;Gamma-glutamyl phosphate reductase	ALDH18A1	P54886	14			0	0	0	0	0	5.70743e-05	0	1.96372e-05	0	0	1.17576e-05	5.87979e-05	0	1.11885e-05	0	8.33465e-05	0	0	0	0	0	0	2.01421e-05	9.79157e-06	0	0.000119937	0	0	6.0855e-05	0	0	0	2.03999e-05	2.15176e-05	2.01574e-06
Retinal dehydrogenase 1	ALDH1A1	P00352	15			0	0	0	0	0	1.80577e-05	0	1.07595e-05	0	0	0.000130387	0	0	0	0	0	0	1.35e-05	3.02262e-05	0	3.5318e-05	0	0.000192727	0.000149776	0	0.000174559	0	6.19837e-05	0	4.04539e-05	0.000185943	4.87363e-05	1.18106e-05	0.000172759	4.60896e-05
Aldehyde dehydrogenase X, mitochondrial	ALDH1B1	P30837	13			0	0	0	4.823e-05	2.7696e-05	3.18963e-05	3.1336e-05	8.91788e-05	0	0	1.50606e-05	0	0	0.000118741	0	0	0	3.1352e-05	0	0	2.95304e-05	0	6.14872e-06	1.52103e-06	0	1.73142e-05	0	0	6.85952e-05	1.17646e-05	0	0	4.71949e-05	8.34261e-06	0
Aldehyde dehydrogenase, mitochondrial	ALDH2	P05091	36			0.000128356	0.000504897	0.000246245	0.00140495	0.000361807	0.000998513	0.000455094	0.000598436	0.000171983	0	0.000704422	0.000359203	9.8259e-05	0.000440985	0.000159684	0.000383127	0.000266095	0.000400307	0.000429019	0.000166251	0.000659563	0	0.000644595	0.000959495	0	0.00214668	0.000469613	0	0.00109692	0.000479775	0.000518999	0.000197394	0.000809722	0.000755077	0.000665704
Fatty aldehyde dehydrogenase;Aldehyde dehydrogenase family 3 member B2;Aldehyde dehydrogenase, dimeric NADP-preferring;Aldehyde dehydrogenase family 3 member B1	ALDH3A2;ALDH3B2;ALDH3A1;ALDH3B1	P51648;P48448;P30838;P43353	2			0	0	0	0	0	0	0	0	0	0	0	0	0	0	0	0	0	0	0	0	0	0	0	0	0	0	0	0	0	0	0	0	0	0	0
Succinate-semialdehyde dehydrogenase, mitochondrial	ALDH5A1	P51649	3			0	0	0	0	0	0	0	1.22248e-05	0	0	2.17786e-05	0	0	3.3889e-05	0	0	0	1.3066e-05	0	0	0	0	2.22031e-05	2.60235e-05	0	4.31304e-05	0	0	0	6.03664e-06	0	0	5.64044e-06	0	0
Methylmalonate-semialdehyde dehydrogenase [acylating], mitochondrial	ALDH6A1	Q02252	13			0	0	0	0	0	6.5355e-05	0	4.38416e-05	0	0	0.000268126	0	0	5.0878e-05	0	0	0	1.22489e-05	8.52276e-05	0	0.000227457	0	0.000292237	0.000147315	0	0.000729706	0	0	0.000220447	1.76731e-05	8.06748e-05	0	0	0.000130091	0.000309365
Alpha-aminoadipic semialdehyde dehydrogenase	ALDH7A1	P49419	2			0	0	0	0	0	1.72281e-05	0	1.93074e-05	0	0	0	0	0	0	0	0	0	0	0	0	0	0	0	0	0	0	0	0	0	2.37884e-05	0	0	2.41621e-05	7.64004e-06	9.37569e-06
4-trimethylaminobutyraldehyde dehydrogenase	ALDH9A1	P49189	18			0	0.000201496	0	0.000216576	0	0.000342982	4.27204e-05	9.13361e-05	0	0	0.000219668	0	4.99133e-05	0.000151493	0	6.22545e-05	9.09837e-05	0.000153892	0.000122704	0	0.000151448	3.81367e-05	0.000278504	7.8656e-05	0	0.000156964	2.26502e-05	4.58358e-05	0.000141052	0.000106622	0.000125544	0	0.00019878	0.000188617	0.000186612
Fructose-bisphosphate aldolase A	ALDOA	P04075	41			0.00702157	0.00756474	0.00362895	0.00542559	0.00566084	0.00729547	0.00315129	0.00652927	0.0100353	0.000352345	0.00314381	0.00373203	0.00516112	0.003531	0.001147	0.00554341	0.00449685	0.00452954	0.00700167	0.00375678	0.00374984	0.00156339	0.00453313	0.00237054	0.00242035	0.00504738	0.00675302	0.0037268	0.00162162	0.0051191	0.00317449	0.00548739	0.00681167	0.00706087	0.00446619
Fructose-bisphosphate aldolase C	ALDOC	P09972	17			0	0.000497918	0	0.000269675	0	0.000365316	0.000118895	0.000376065	0	0	0.000227312	0	0.000216453	0.000171819	0	0.000270035	0	0.000361191	8.04368e-06	0	0.000220869	0.000171875	0.000133384	0.000189123	0	9.63153e-05	0.000167159	0	0.00014478	0.000698795	8.12721e-05	0	6.50444e-05	0.000240449	4.98821e-05
THO complex subunit 4	ALYREF	Q86V81	7			0	0.000111232	0.000228103	8.74889e-05	0.000151971	5.70401e-05	6.44438e-05	0.000206297	0.000110267	0	4.58934e-05	0	0.000281827	3.86119e-05	0.00021019	3.90494e-05	0.000101513	6.45795e-05	0	0.000152072	0.000113608	3.74748e-05	9.1318e-05	6.31037e-05	6.84555e-05	6.07449e-05	0.000110837	0	4.50459e-05	0.000101903	0	8.90706e-05	0.000103716	5.2041e-05	3.84859e-05
Protein AMBP;Alpha-1-microglobulin;Inter-alpha-trypsin inhibitor light chain;Trypstatin	AMBP	P02760	5			0	0	0	0	0	0	0	0	0	0	0	0	0	0	0	0	0	0	2.92048e-05	0	0	3.81166e-05	1.45038e-05	7.02962e-05	0	0	0	0	0	1.58447e-05	1.72205e-05	0	0	0	1.71615e-05
Alpha-amylase 2B;Pancreatic alpha-amylase;Alpha-amylase 1	AMY2B;AMY2A;AMY1A	P19961;P04746;P04745	2			0	0	0	0	0	0	0	0	0	0	0	0	0	0	0	0	0	0	0	0	0	0	0	0	0	0	0	0.000685286	0	0	0	0	0	0	0
Angiogenin	ANG	P03950	2			0	0	0	0	0	0	0	0	0	0	0	0	0	0	0	0	0	0	0	0	0	0	0	0	0	0	0	0	0	0	0	0	0	0	0
Ankyrin-1	ANK1	P16157	20			0	0	0	0	0	0	0	0	0	0	0.00012393	0	0	3.40604e-05	0	0	0	0.000215335	0	0	8.79235e-06	0	5.01588e-05	0	0	0	0	0	4.79232e-06	0.000183599	0	3.33566e-05	0	1.01715e-05	0
Rabankyrin-5	ANKFY1	Q9P2R3	1			0	0	0	0	0	0	0	0	0	0	0	0	0	0	0	0	0	0	0	0	0	0	3.12812e-06	0	0	9.38474e-06	0	0	0	0	0	0	0	0	0
Ankyrin repeat and SAM domain-containing protein 4B	ANKS4B	Q8N8V4	3			5.56331e-05	0	0	0	0	1.02646e-05	0	0	6.13941e-05	0	0	0	0	0	0	0	0	0	2.33109e-05	0	0	0	0	0	0	0	0	0	0	0	0	0	0	0	0
Acidic leucine-rich nuclear phosphoprotein 32 family member A	ANP32A	P39687	11			0	0	0	4.66068e-05	0	9.2965e-05	8.04673e-05	0.000129137	0	0	0.000187504	0	6.09857e-05	6.09247e-05	0	8.37505e-05	0	8.04788e-05	0.000288973	0	0.000142169	5.44733e-05	8.89156e-05	6.94748e-05	0	0.00018487	0.000150321	7.73023e-05	0.000164293	0.000119343	0.000154201	0.00012896	0.000187888	0.000160436	7.73152e-05
Acidic leucine-rich nuclear phosphoprotein 32 family member B	ANP32B	Q92688	3			0	0	0	0	0	0	0	4.3375e-05	0	0	0	0	0	0	0	0	0	0	0	0	7.48876e-06	0	0	0	0	0	0	0	0	4.11072e-05	0	0	0	6.67703e-06	0
Acidic leucine-rich nuclear phosphoprotein 32 family member E	ANP32E	Q9BTT0	1			0	0	0	0	0	0	0	0	0	0	7.05985e-06	0	0	0	0	0	0	0	0	0	1.62703e-05	0	6.92491e-06	1.44997e-05	0	0	0	0	1.39299e-05	0	0	0	0	0	0
Aminopeptidase N	ANPEP	P15144	11			0	0	0	0	0	1.05588e-05	0	0	0	0	2.73011e-05	0	2.50663e-05	1.26835e-05	0	0	0	0	1.84266e-05	8.82693e-05	0	0	3.5759e-05	0	0.000122467	0.00040571	3.01562e-05	0	0.000142657	4.51196e-05	6.57969e-05	0	0	0	0
Annexin A1	ANXA1	P04083	26			0	0.000203293	0	0	0	0.00079499	0.000332746	3.40517e-05	0	0.000816143	4.59988e-05	0	5.70329e-05	0.00013092	0.000360958	0	0.000240944	0.000514001	0	7.82997e-05	7.54869e-05	2.05564e-05	0.000215264	3.67782e-05	0	0.000209464	0.000188618	0	2.10268e-05	0.000229534	2.0455e-05	2.68209e-05	4.21385e-05	0	0
Annexin A11	ANXA11	P50995	24			9.59786e-05	0.000125386	0	0.000352411	0.000181677	0.000441366	0.000152386	0.000502269	0.000373356	0	0.0001693	0.000273994	0.000337324	0.000153708	0.000159194	0.000452877	0.000417865	0.000290683	0.000146867	0	0.000155593	0	0.000282221	0.000187213	0.000172778	0.000430099	0.000602009	0	0.000482148	0.000384657	9.93968e-05	0.000179741	0.000346679	0.000236342	0.000118233
Annexin A13	ANXA13	P27216	12			0	0	0	0.000124571	0	2.16046e-05	1.49173e-05	0	0	0	0	0	4.21649e-05	1.59171e-05	0	0	0	1.19138e-05	0	0	1.52733e-05	0	0	1.53397e-06	0	9.62395e-05	0	0	0	2.38644e-05	1.13401e-05	0.000195408	0	0	0
Annexin A2;Putative annexin A2-like protein	ANXA2;ANXA2P2	P07355;A6NMY6	50			0.00214612	0.00292017	0.00258906	0.00530357	0.00289858	0.00802655	0.00444007	0.00592163	0.00324164	0.000899075	0.00446933	0.00200913	0.00322078	0.00516004	0.000795291	0.00660866	0.00381347	0.00689387	0.00320066	0.00487925	0.00346255	0.00051413	0.00462943	0.00393857	0.00243058	0.0101608	0.00469412	0.000450281	0.00816199	0.00945092	0.0038888	0.0058976	0.00504193	0.00438843	0.00250791
Annexin A3	ANXA3	P12429	12			0	0	0	0.000182668	0	8.97577e-05	5.50355e-05	5.86308e-05	0	0	3.39993e-06	4.82629e-05	5.07488e-05	1.74357e-05	0	4.92841e-05	0	1.63458e-05	0	0	4.03738e-06	0	3.11194e-05	4.4716e-06	5.68149e-05	5.89955e-05	0	0	3.3197e-05	5.75369e-05	0	5.97488e-05	0.000143251	1.41412e-05	0
Annexin A4	ANXA4	P09525	30			0.00106935	0.00061126	0.000503424	0.00222816	0.00103105	0.000834492	0.00100123	0.00093244	0.000934407	9.45108e-05	0.000333009	0.00050825	0.00102252	0.000833178	0	0.00298866	0.0010869	0.000970952	0.000276351	0.000378961	0.000251703	0	0.000467617	0.000134826	0.000811207	0.000920244	0.00115581	0	0.00073224	0.0010542	0.000216864	0.00086213	0.000671373	0.000366633	0.000275747
Annexin A5	ANXA5	P08758	23			0	0	0	0.000152497	0	0.000414121	8.03324e-05	7.72942e-05	0	0.000191039	0.000166363	0.000108032	0	5.38805e-05	0.000502406	8.50871e-05	0.000174443	0	0	0.000503732	0	0	0.000354072	4.53405e-05	0.000104447	0.000304204	0.000151804	0	4.59524e-05	0.000134675	7.06959e-05	0.000152877	9.14114e-05	0.000245379	9.19716e-05
Annexin A6	ANXA6	P08133	16			0	0	0	0	0	2.55601e-05	0	0	0	0.00020427	5.83617e-05	0	0	9.16073e-06	0	0	0	1.97525e-05	0	0	9.22618e-06	0	9.93718e-05	1.92934e-05	0	1.74612e-05	0	0	0	1.71049e-05	1.63372e-05	0	0	3.43907e-06	1.1448e-05
Annexin A7	ANXA7	P20073	7			0	1.34889e-05	0	3.45918e-05	0	5.31548e-05	0	8.14575e-06	0	0	2.38955e-05	0	0	2.51548e-05	0	1.8298e-05	0	0	0	0	1.16034e-05	0	1.44384e-05	5.70729e-06	0	1.53262e-05	0	0	1.95835e-05	2.65896e-05	1.15768e-05	0	0	1.30301e-05	1.28959e-05
Amiloride-sensitive amine oxidase [copper-containing]	AOC1	P19801	7			0	2.55187e-05	0	0	0	3.38083e-05	0	0	0	0	1.05707e-05	0	0	1.96038e-05	0	0	0	2.76038e-05	1.16095e-05	0	0	0	1.94111e-05	6.90164e-06	0	0	0	0	0	3.55859e-05	0	0	0	6.13461e-05	2.79205e-05
Membrane primary amine oxidase	AOC3	Q16853	4			0	0	0	0	0	0	0	0	0	0.000311025	0	0	0	0	0	0	0	0	0	0	0	0	0	0	0	0	0	0	0	0	0	0	0	0	0
AP-1 complex subunit beta-1	AP1B1	Q10567	8			0	1.32767e-05	0	0	1.63155e-05	3.78115e-05	0	0	0	0	0	0	0	0	0	5.65619e-05	0	0	0	0	0	0	0	1.10239e-05	0	6.73096e-05	0	0	0	0	0	0	0	0	0
AP-1 complex subunit gamma-1	AP1G1	O43747	2			0	0	0	0	0	0	0	0	0	0	0	0	0	0	0	0	0	0	0	0	0	0	1.46339e-05	4.89382e-06	0	0	0	0	0	0	0	0	0	6.44441e-06	8.07088e-06
AP-1 complex subunit sigma-1A	AP1S1	P61966	1			0	0	0	0	0	0	0	8.79963e-06	0	0	0	0	0	0	0	0	0	0	0	0	0	0	0	0	0	0	0	0	0	0	0	0	0	0	0
AP-2 complex subunit alpha-2;AP-2 complex subunit alpha-1	AP2A2;AP2A1	O94973;O95782	2			0	0	0	0	0	7.8591e-06	0	0	0	0	0	0	0	0	0	0	0	0	0	0	0	0	0	0	0	0	0	0	0	0	0	0	0	0	0
AP-2 complex subunit beta	AP2B1	P63010	6			0	0	0	0	0	0	0	0	0	0	0	0	0	0	0	0	0	0	0	0	0	0	0	0	0	2.0836e-05	0	0	0	0	0	0	0	0	0
Serum amyloid P-component;Serum amyloid P-component(1-203)	APCS	P02743	3			0	0	0	0	0	0	0	0	0	0	0	0	0	0	0	0	0	0	0	0	1.74296e-05	2.54738e-05	0	7.07688e-05	0	0	0	0	0	3.88317e-05	0	0	0	0	0
Acylamino-acid-releasing enzyme	APEH	P13798	4			0.000111006	9.19878e-05	0.000111181	5.34876e-05	6.31101e-05	0	4.87231e-05	8.35011e-05	0.00010039	0	0	0.000163825	3.68052e-05	6.09898e-05	0	8.99271e-05	0	4.7781e-05	0	0	5.65317e-06	0	1.73908e-05	0	0	1.58053e-05	0	0	0	5.11408e-05	0	2.32242e-05	7.06438e-05	2.77557e-05	0
DNA-(apurinic or apyrimidinic site) lyase;DNA-(apurinic or apyrimidinic site) lyase, mitochondrial	APEX1	P27695	7			0	9.66866e-05	0	0	0	0	0	0	0	0	5.23469e-05	0	0	0	0	0	0	0	2.63815e-05	0	3.09701e-05	0	0.000108706	2.60232e-05	0	4.65912e-05	0	0	0	0	3.19696e-05	0	1.8569e-05	6.52948e-05	2.08524e-05
Methylthioribulose-1-phosphate dehydratase	APIP	Q96GX9	1			0	0	0	0	0	0	0	0	0	0	0	0	0	0	0	0	0	0	0	0	0	0	0	0	0	0	0	0	0	0	0	0	0	0	0
Adipocyte plasma membrane-associated protein	APMAP	Q9HDC9	1			0	0	0	0	0	0	0	0	0	0	1.11505e-05	0	0	0	0	0	0	0	0	0	0	0	0	5.84934e-06	0	2.87223e-05	0	0	1.8978e-05	2.19974e-05	0	0	0	8.52691e-06	6.39013e-06
Apolipoprotein A-I;Proapolipoprotein A-I;Truncated apolipoprotein A-I	APOA1	P02647	36			0	0.0050222	0	0.000265627	0.00159573	0.000265488	0.00968605	0.00103382	0	0	0.0045949	0	0.00127964	0.0018838	0	0.00385059	8.64118e-05	0.00370788	0.00379994	0	0.00649119	0.0100851	0.00379638	0.0199201	0.0012791	0.000567775	0.000126377	7.7664e-05	0.00320565	0.00123963	0.00352356	0.000108184	0.000221558	0.00526979	0.0108005
Apolipoprotein A-II;Proapolipoprotein A-II;Truncated apolipoprotein A-II	APOA2	P02652	5			0	0.000207819	0	0	0	0	0.000731925	0	0	0	0.000184191	0	4.71868e-05	3.92779e-05	0	0	0	4.17887e-05	0.000488646	0	0.000570113	0.000854619	0.000293641	0.000405361	5.27257e-05	7.70541e-05	0	0.000160906	0.00019108	1.82233e-05	0.000379454	0	0	0.000196021	0.000404612
Apolipoprotein A-IV	APOA4	P06727	32			0	0.000270112	0	0	0.000299689	5.88183e-05	0.000376085	2.97172e-05	0	0	8.85243e-05	0	5.0659e-05	0	0	3.18004e-05	5.77624e-05	3.46577e-05	0.000102793	0	0.000144201	0.000486545	4.75444e-05	0.000798543	0	0	0	0	8.09995e-05	0.00014296	0.000168123	0	0	0.000114774	0.000596569
Apolipoprotein B-100;Apolipoprotein B-48	APOB	P04114	31			0	0	0	9.80494e-05	0	0	0	0	0	0	2.05954e-06	0	0	0	0	0	0	0	1.70122e-05	0	1.16163e-05	0	0	0.000437119	0	0	0	0	0	5.77804e-05	0	0	0	1.7664e-05	0.000152193
Apolipoprotein B receptor	APOBR	Q0VD83	23			0.00042581	0.000364434	0	0.00023129	0.000358399	0.000206046	0.000169763	0.000175049	0.000503544	0	1.02949e-05	0.00069567	0.000335819	0.000128599	0	0.00053094	0.000476058	0.000148521	0.000260203	0.00113249	6.14123e-05	3.17835e-05	3.49736e-06	1.93682e-05	0.000231176	2.96261e-05	0.000444988	0	2.7084e-05	0.00026078	2.73868e-05	0.000162357	0.000317372	2.98518e-05	0
Apolipoprotein C-I;Truncated apolipoprotein C-I	APOC1	P02654	2			0	0	0	0	0	0	0	0	0	0	4.55508e-05	0	0	0	0	0	0	0	0	0	0	0	6.49338e-05	7.99246e-05	0	0	0	0	0	0	0	0	0	0	0
Apolipoprotein C-III	APOC3	P02656	3			0	2.28566e-05	0	0	0	2.86742e-05	0.000109446	1.31788e-05	0	0	0	0	2.43848e-05	0	0	6.14464e-05	0	2.82575e-05	0	0	9.88255e-06	2.85383e-05	0	3.23563e-05	0	0	0	0	0	0	0	0	0	1.73736e-05	0
Apolipoprotein D	APOD	P05090	5			0	0	0	0	0	0	0	0	0	0	1.3964e-05	0	0	0	0	0	0	0	1.44844e-05	0	1.75429e-05	0	2.47225e-05	0.000139076	0	0	0	0	4.27501e-05	0	1.72485e-05	0	0	1.58004e-05	0.000158328
Apolipoprotein E	APOE	P02649	6			0	6.56883e-05	0	0	0	0	0.000124296	0	0	0	0	0	0	0	0	0.000100882	0	1.19991e-05	0	0	0	0	0	0	0	0	0	0	0	0	0	0	0	0	0
Apolipoprotein F	APOF	Q13790	1			0	0	0	0	0	0	0	0	0	0	0	0	0	0	0	0	0	0	0	0	0	0	0	1.01114e-05	0	0	0	0	0	0	0	0	0	0	0
Beta-2-glycoprotein 1	APOH	P02749	13			0	0.000246377	0.000365001	0.000218945	0.000320099	1.15764e-05	0.000110221	0.000157024	0	0.000222674	0.00124231	0.00026093	0.000391895	0.000333857	0.00102414	0.000206981	0.000260576	0.000218332	0.000213183	0.00152721	0.000176048	0.000281551	2.32659e-05	0.000406515	0.000748687	5.59564e-05	0.000327167	7.4586e-05	0.000763446	0.000410402	0.000266426	0	0.000106041	0.000106982	8.85733e-06
Apolipoprotein O	APOO	Q9BUR5	2			0	0	0	0	0	1.14561e-05	0	0	0	0	0	0	0	0	0	0	0	0	0	0	0	0	0	0	0	6.69437e-06	0	0	0	0	0	0	0	0	0
MICOS complex subunit MIC27	APOOL	Q6UXV4	2			0	0	0	0	0	0	0	0	0	0	2.32093e-05	0	0	0	0	0	0	0	0	0	1.29708e-05	0	1.92927e-05	0	0	7.30086e-05	0	0	2.38613e-05	0	3.12655e-05	0	0	0	1.52004e-05
DCC-interacting protein 13-alpha	APPL1	Q9UKG1	2			0	0	0	0	0	1.76514e-05	0	2.52356e-05	0	0	0	0	0	0	0	0	0	1.06678e-05	0	0	0	0	0	0	0	0	0	0	0	0	0	0	0	0	0
DCC-interacting protein 13-beta	APPL2	Q8NEU8	7			0	0	0	0	0	4.09711e-05	0	1.10225e-05	0	0	0	0	0	0	0	0	0	0	0	0	0	0	3.15469e-05	0	0	4.06201e-05	0	0	0	0	3.07942e-05	0	0	0	8.87833e-06
Adenine phosphoribosyltransferase	APRT	P07741	3			0	0.000150483	5.18428e-05	5.50469e-05	5.88935e-05	0	4.61784e-05	0	4.36712e-05	0	0	0	0	0	0.000217571	2.99257e-05	0	0	0	0	0	0	0	0	0	0	3.3949e-05	0	0	1.85661e-05	0	0	0.000102316	1.45402e-05	0
Aquaporin-8	AQP8	O94778	2			0	0	0	0	0	0	0	0	0	0	0	0	0	0	0	0	0	0	5.57906e-06	0	0	0	0	0	0	7.55546e-06	0	0	0	0	0	0	0	0	0
Coatomer subunit delta	ARCN1	P48444	18			7.60985e-05	0.000109607	0	0	0	7.48472e-05	0	5.25168e-05	0.000138397	0	6.14435e-05	0	9.75717e-05	0	0	4.44307e-05	0	0	7.41495e-05	0	0.000136746	0	9.5572e-05	0.000103412	0	0.00028825	0	0	3.75603e-05	0.000100043	4.74064e-05	6.52978e-05	8.93101e-05	0.000239178	0.000149007
ADP-ribosylation factor 1;ADP-ribosylation factor 3	ARF1;ARF3	P84077;P61204	2			0	0	0	0	0	0	0	0	0	0	0	0	0	0	0	0	0	0	0	0	0	0	0	0	0	2.04778e-05	0	0	0	0	0	0	0	2.49081e-05	8.72954e-06
ADP-ribosylation factor GTPase-activating protein 2	ARFGAP2	Q8N6H7	4			0	0	0	0	0	1.77145e-05	0	0	0	0	0	0	0	0	0	0	0	0	0	0	0	0	3.10361e-06	0	0	0	0	0	0	0	0	0	0	0	0
Arfaptin-1	ARFIP1	P53367	3			0	2.71166e-05	0	3.32627e-05	0	2.5938e-05	0	2.8494e-05	0	0	0	0	0	3.49325e-05	0	0	0	3.11989e-05	0	0	0	0	0	8.1227e-06	0	0	0	0	0	0	0	0	2.91657e-05	0	0
Arginine and glutamate-rich protein 1	ARGLU1	Q9NWB6	3			0	0	0	0	0	1.11879e-05	0	0	0	0	0	0	0	0	0.00022254	0	0	0	0	0	0	0	0	0	0	0	0	0	0	0	0	0	0	0	0
Rho GTPase-activating protein 1	ARHGAP1	Q07960	2			0	0	0	0	0	0	0	0	0	0	0	0	0	0	0	0	0	0	0	0	0	0	0	1.95809e-06	0	0	0	0	0	0	0	0	0	2.10902e-05	0
Rho GDP-dissociation inhibitor 1	ARHGDIA	P52565	15	Bacterial adhesion; actin remodelling		0	0.000704234	0	0.000113977	5.1935e-05	0.000937668	6.72368e-05	0.000324246	0	0	0.000309806	0	8.8889e-05	0.000304244	0	4.4706e-05	0	0.00038739	0.000132722	0	0.000748723	0.000289642	0.000620069	0.000326039	0	0.000204979	5.05156e-05	0	0.000123933	0.000698305	0.00016815	0.000250552	0.000420825	0.000822499	0.000381874
Rho GDP-dissociation inhibitor 2	ARHGDIB	P52566	10			9.60959e-05	0.000181699	0	0	5.04436e-05	5.70655e-05	0.000219378	7.72952e-05	0	0	4.00424e-05	0	9.61254e-05	4.24584e-05	0	3.04443e-05	0	5.63838e-05	9.40974e-05	0	7.66752e-05	0.000597848	0.000281361	0.000259917	0	4.94117e-05	0	0	0.000141303	7.89402e-05	0.000355014	0.000103413	0	0.000173027	0.000124392
Actin-related protein 2/3 complex subunit 1B	ARPC1B	O15143	7	Arp2/3 complex; bacterial adhesion		0	0.000116527	0	0	0	8.02772e-05	5.88378e-05	1.98397e-05	0	0	5.09538e-05	0	0	1.02259e-05	0	0	0	7.96378e-05	0.000143478	0	3.01803e-05	0	1.88666e-05	5.68592e-05	0	0.000267565	0	0	4.03075e-05	7.0114e-05	0.000119497	0	0.000102929	0.00012506	2.12347e-05
Actin-related protein 2/3 complex subunit 2	ARPC2	O15144	7	Arp2/3 complex; bacterial adhesion	Arp2/3 complex; bacterial adhesion	0	8.76362e-06	0	0	0	0	0	0	0	0	0.000158965	0	0	0	0	2.16856e-05	0	0	5.85042e-05	0	1.19899e-05	0	0.000128799	0.000124376	0	0.000211432	0	0	6.08383e-05	0	9.27086e-05	0	0.000107361	0.000136738	0.000252868
Actin-related protein 2/3 complex subunit 3	ARPC3	O15145	8			0	7.2968e-05	0	0	0	4.35647e-05	0.000109541	5.64682e-05	0	0	6.24676e-05	0	0	0	0	0	0	0	0	0	1.31564e-05	0	0.000148273	7.83044e-05	0	9.18303e-05	0	0	4.35953e-05	8.47514e-05	0	0	7.50061e-05	0.00016336	1.83474e-05
Actin-related protein 2/3 complex subunit 4	ARPC4	P59998	8			0	5.36856e-05	0	0	0	1.65194e-05	0	8.44122e-05	0	0	0	0	0	8.28427e-05	0	0	0	4.08415e-05	6.59764e-06	0	2.15784e-05	0	0	2.56533e-05	0	0	0	0	1.9446e-05	0.000146078	0	0	4.92666e-05	5.57749e-06	0
Actin-related protein 2/3 complex subunit 5	ARPC5	O15511	12			0.000260953	0.000635255	0.000636214	0.000236371	0.000548985	0.000473433	0.000348555	0.000483618	0.000266827	5.78334e-05	0.000141165	0.000739834	0.000324481	0.000400655	0.000281984	0.00072574	0.000376747	0.000498523	0.000167273	0.000329416	0.000191184	0.000144869	0.00018762	0.00021387	0.000400992	0.000305588	0.000428903	4.25033e-05	0.000177028	0.000501499	0.000138038	0.000330564	0.00098864	0.000270226	3.66216e-05
Actin-related protein 2/3 complex subunit 5-like protein	ARPC5L	Q9BPX5	3			0	2.47966e-05	0	1.86454e-05	4.97755e-05	1.68284e-05	1.92062e-05	8.34437e-05	0	0	0	0	0	0	0	3.74127e-05	0	0	0	0	8.26854e-06	0	0	0	0	1.33524e-05	0	0	0	0	0	0	0.000174692	7.1328e-06	0
Arpin	ARPIN	Q7Z6K5	1			0	0	0	0	0	0	0	0	0	0	0	0	0	0	0	0	0	0	0	0	0	0	0	0	0	0	0	0	0	0	0	0	0	0	0
Beta-arrestin-1	ARRB1	P49407	4			0	1.95588e-05	0	0	0	0	0	0	0	0	0	0	0	0	0	0	0	0	0	0	0	0	0	0	0	2.66851e-05	0	0	0	1.97824e-05	3.06572e-05	0	0	2.66005e-05	0
Acid ceramidase;Acid ceramidase subunit alpha;Acid ceramidase subunit beta	ASAH1	Q13510	5			0	3.54345e-05	0	0	0	0	0	0	0	0	6.69783e-06	0	0	2.15025e-05	0	0	0	2.47726e-05	0	0	2.7407e-06	0	2.80452e-05	6.8676e-06	0	4.61227e-05	0	0	0	0.000116741	1.24588e-05	0	0	0	0
Argininosuccinate lyase	ASL	P04424	6			0	1.92548e-05	0	0	0	0	0	0	0	0	1.64132e-05	0	0	0	0	0	0	0	4.77293e-05	0	1.99788e-05	0	3.48145e-05	0	0	4.57589e-05	0	0	0	0	0	0	1.41275e-05	3.80579e-05	3.35277e-05
Aspartyl/asparaginyl beta-hydroxylase	ASPH	Q12797	4			0	0	0	2.21238e-05	0	0	0	0	0	0	7.60212e-06	0	0	0	0	0	0	0	0	0	1.7232e-05	0	0	0	0	1.22744e-05	2.33614e-05	0	2.74983e-05	0	0	0	0	6.36512e-06	0
Asporin	ASPN	Q9BXN1	7			0	0	0	0	0	0	0	0	0	0	0	0	0	0	0	0	0	0	0	0	0	0	0	0	0	0	0	0	0	0	0	0	0	0	0
Isoaspartyl peptidase/L-asparaginase;Isoaspartyl peptidase/L-asparaginase alpha chain;Isoaspartyl peptidase/L-asparaginase beta chain	ASRGL1	Q7L266	1			0	0	0	0	0	0	0	0	0	0	0	0	0	0	0	0	0	0	0	0	0	0	0	0	0	0	0	0	0	0	0	0	0	0	0
Argininosuccinate synthase	ASS1	P00966	18			0	0.000240434	0	7.07369e-05	0	0.000130032	0.000108882	0.000119931	9.2242e-05	0	2.08683e-05	0	0	0.000120205	0	0.000133514	0	0.000274456	3.86595e-05	0	6.32898e-05	0	2.73555e-05	3.24829e-05	0	3.50327e-05	0	0	1.48928e-05	4.95598e-05	0	0	2.84388e-05	0.000111314	0.000117536
ATPase family AAA domain-containing protein 3A	ATAD3A	Q9NVI7	7			0	0	0	4.23472e-05	0	6.56144e-06	0	3.14372e-06	0	0	0	0	0	1.2268e-05	0	2.68671e-05	0	0	0	0	0	0	0	0	0	0	0	0	0	0	0	0	0	0	0
Ubiquitin-like-conjugating enzyme ATG3	ATG3	Q9NT62	2			0	1.37464e-05	0	0	0	0	0	1.36964e-05	0	0	0	0	0	0	0	0	0	0	0	0	0	0	0	0	0	0	0	0	0	0	0	0	0	0	0
Bifunctional purine biosynthesis protein PURH;Phosphoribosylaminoimidazolecarboxamide formyltransferase;IMP cyclohydrolase	ATIC	P31939	12			0	5.69523e-05	0	1.58949e-05	0	1.75394e-05	0	0	0	0	1.172e-05	0	0	0	0	0	0	0	0	0	1.04546e-05	0	2.55609e-05	1.12388e-05	0	2.51789e-05	0	0	0	0	8.2379e-06	0	8.03974e-05	5.11053e-05	1.37278e-05
Atlastin-3	ATL3	Q6DD88	5			0	0	0	0	0	0	0	0	0	0	8.71388e-06	0	0	0	0	0	0	0	0	0	0	0	0	2.42598e-06	0	3.94464e-05	0	0	2.26911e-05	0	0	0	0	1.23889e-06	0
Potassium-transporting ATPase alpha chain 2	ATP12A	P54707	5			0	0	0.00110279	0	0.000361923	0	0	0	0	0	0.000170853	0	0	0	0	0	0.000892095	0	0	0	0.000155409	0	0	0.000149754	0	0.000468255	0.000922883	0	0.000439853	0	0	0	0	0.000191705	0.000221091
Sodium/potassium-transporting ATPase subunit alpha-1	ATP1A1	P05023	57			0.00127374	0.000736141	0.00422486	0.00686014	0.00211943	0.00552602	0.00124031	0.00148383	0.000412096	0.00010796	0.00686481	0.00301721	0.0019809	0.00518868	0.00203978	0.00380086	0.00606279	0.00230115	0.00557712	0.00734437	0.00374446	0.0002957	0.00223339	0.00256375	0.00393177	0.0128847	0.00740681	0.000349763	0.012612	0.00366915	0.00398771	0.00164383	0.000629219	0.00410498	0.00262886
Sodium/potassium-transporting ATPase subunit alpha-2	ATP1A2	P50993	16			0	0	0	0	0	0	0	0	0	0	9.54654e-06	0	0	0	0	0	0	0	0	0	0	0	0	0	0	0	0	0	9.70352e-06	0	0	0	0	0	0
Sodium/potassium-transporting ATPase subunit beta-1	ATP1B1	P05026	16			0	6.78684e-05	0.000356765	7.78286e-05	0.00019567	0.000486869	0	0.000131088	0	0	0.000646072	0.000288852	0	0.000535313	0	4.08593e-05	0	0.000135417	0.000426504	0	0.000583489	2.22077e-05	0.000583696	0.000417991	0	0.00208538	5.84006e-05	0	0.0016413	0.000317823	0.000212888	0.000112839	1.42564e-05	0.00043879	0.000353861
Sodium/potassium-transporting ATPase subunit beta-3	ATP1B3	P54709	8			0	4.51466e-05	0.000128436	0.000223818	4.20568e-05	0.00033892	5.1518e-05	4.29137e-05	0	0	8.17969e-05	0	6.02176e-05	0.000124854	0	0.00013252	0.000179061	0.000109551	0.000138457	0.000132456	5.20222e-05	0	3.06761e-05	5.21448e-05	0	0.00046801	0.000306539	0	0.000492959	0.000286203	7.52114e-05	0.000129971	0	9.26466e-05	0
Sarcoplasmic/endoplasmic reticulum calcium ATPase 2	ATP2A2	P16615	20			0	0	0	9.01516e-05	0	4.22959e-05	1.8782e-05	0	0	0	0.000182807	0	0	9.56555e-05	0	0	0	1.74366e-05	0	0	6.50251e-05	0	4.84152e-05	1.9843e-05	0	0.000505564	5.2045e-05	0	0.000255015	7.20918e-05	7.89815e-05	0	0	9.20585e-05	4.41498e-05
Sarcoplasmic/endoplasmic reticulum calcium ATPase 3	ATP2A3	Q93084	15			0	3.79515e-06	0	0.000217408	0	2.52906e-05	1.71542e-05	1.59613e-05	0	0	5.97765e-05	4.65158e-05	3.36542e-05	4.85545e-05	0	0.000169974	0.00013878	1.95902e-05	0	0	4.15941e-06	0	1.6319e-06	6.56156e-06	0.000262777	0.00016047	0	0	5.32746e-05	1.06772e-05	6.43749e-06	0	3.50261e-05	2.06223e-05	4.42312e-06
Plasma membrane calcium-transporting ATPase 1	ATP2B1	P20020	9			0	2.05867e-05	0	8.64758e-05	4.41674e-05	3.31763e-05	3.85723e-05	2.43578e-05	0	0	2.07742e-05	0	0	3.74643e-05	0	0.000133097	6.81232e-05	2.90714e-05	1.13106e-05	0	0	0	0	0	0	0.000127064	0.00042654	0	0.000128878	3.42394e-05	0	0	2.72619e-05	1.22382e-05	0
ATP synthase subunit alpha, mitochondrial	ATP5A1	P25705	46			0.00609515	0.00240192	0.00986164	0.0133388	0.00620271	0.00953941	0.0075256	0.00732906	0.00386313	0.00384917	0.00524081	0.0090994	0.0105675	0.00933234	0.0043347	0.0121236	0.0118444	0.00733083	0.00419494	0.00275654	0.00516727	0.000733507	0.00603913	0.00378724	0.00765385	0.0116717	0.0122185	0.000244055	0.0108037	0.00785176	0.00405593	0.0119111	0.00747198	0.00474512	0.00651025
ATP synthase subunit beta, mitochondrial	ATP5B	P06576	34			0.00276621	0.00323872	0.00522664	0.0118963	0.00330729	0.0100795	0.00521576	0.00828341	0.00307351	0.0019133	0.00340031	0.00431659	0.0107593	0.00710431	0.00486744	0.00984838	0.00211487	0.00660284	0.00144213	0.00028381	0.00371305	5.82882e-05	0.00381331	0.00333296	0.00174934	0.00364184	0.00367353	0	0.00498791	0.00487467	0.00162668	0.00412747	0.00849309	0.00244329	0.00169774
ATP synthase subunit gamma, mitochondrial	ATP5C1	P36542	16			0	5.56567e-05	0	0.000179942	0.000488265	0.000441637	0.000313645	0.000226858	0.00039308	0	0.000526095	0.000107476	0.000286427	3.28629e-05	0	0.000560291	0.000418445	0.000193102	0.000646711	0	0.000453596	4.69483e-05	0.000569295	0.000332452	0.000304668	0.00104165	0.000330517	0	0.00134181	0.000220321	0.000464009	0.00042531	0.000176932	0.000311966	0.00056366
ATP synthase subunit delta, mitochondrial	ATP5D	P30049	4			0.00159864	0.000811063	0.00208278	0.0017485	0.00192906	0.00128157	0.000198717	0.000363875	0.00237936	0.000597813	0.000359638	0.00273194	0.00232242	0.000589028	0.0037403	0.00158887	0.0022659	0.00145742	0.000385477	0.00300527	0.000395133	0	0.000300304	0.000265216	0.00151575	0.000552535	0.00245786	0	0.000768387	0.000448374	0.000204967	0.00194698	0.00139743	0.000270001	0.000363749
ATP synthase F(0) complex subunit B1, mitochondrial	ATP5F1	P24539	8			0	0	0	0.000212173	0	0.000279944	0	0.00011201	0	0	0.000477826	0	0	0.000134324	0	6.93547e-05	0	6.54903e-05	9.10484e-05	0	0.000300253	0	0.000573074	0.000312199	0	0.00164303	0	0	0.00054573	0.000173278	0.000467927	7.73078e-05	1.64951e-05	0.000458612	0.000492142
ATP synthase subunit d, mitochondrial	ATP5H	O75947	16			0.000705585	0.000221449	0.000399554	0.000999212	0.000829721	0.00065072	0.000759255	0.000807019	0.000213989	0	0.000381269	0.000229128	0.000998805	0.000185913	0	0.000696389	0.000956466	0.00100628	0.000554981	0	0.000290082	0.000127971	0.000471534	0.000313353	0.00031346	0.000927117	0.00155393	0	0.00121036	0.000341041	0.000377564	0.00104868	0.000699318	0.000453314	0.000248891
ATP synthase subunit e, mitochondrial	ATP5I	P56385	4			0	0.000103262	0.000102083	0.000414358	0.000260925	0.000565301	0.000519777	0.000286234	0.000116805	0.000321247	0.000152997	0.000151504	0.000744477	0.000148007	0	0.000172368	0	6.31452e-05	0.000207885	0.0032184	0.000182009	6.09963e-05	0.000291204	0.000140415	0.000359282	0.000296997	7.33324e-05	0	0.000471078	0.000186331	0.00015622	0.000618561	0.000375311	0.000161223	0.000118658
ATP synthase-coupling factor 6, mitochondrial	ATP5J	P18859	9			0	6.45326e-05	0	0	0	0.000358424	0	0.000212121	0	0	0.000134472	0	0.00032078	4.1814e-05	0	0	0	0.000101871	0	0	8.91687e-05	0	0.000135876	0.000153728	0	1.97049e-05	2.76976e-05	0	0.000179203	0.000176963	0	6.38241e-05	0.000262994	1.25171e-05	0
ATP synthase subunit f, mitochondrial	ATP5J2	P56134	2			0	0	0	0	0	0	0	0	0	0	2.40527e-05	0	0	0	0	0	0	0	0	0	2.82232e-05	0	1.4364e-05	0	0	2.81757e-05	0	0	2.34582e-05	0	0	0	0	0	9.42336e-06
ATP synthase subunit g, mitochondrial	ATP5L	O75964	4			0	0	0	0	0	0	0	0	0	0	2.51427e-05	0	0	0	0	0	0	0	0	0	1.18525e-05	0	4.26233e-05	4.16978e-05	0	7.21919e-05	0	0	0.000127966	0	0.000143132	0	0	9.33607e-06	4.87375e-06
ATP synthase subunit O, mitochondrial	ATP5O	P48047	22			0.00121929	0.000955758	0.000630013	0.00193621	0.00189923	0.00317017	0.0021625	0.00274315	0.00208009	0.000407711	0.000723897	0.00072872	0.00190939	0.00184486	0	0.00263969	0.00190152	0.00167517	0.000136784	0	0.000509746	3.68749e-05	0.000557462	0.000522404	0.000643868	0.000799437	0.00165063	0	0.00119117	0.00156618	0.00013007	0.00158776	0.00423318	0.000397298	0.000220737
V-type proton ATPase 116 kDa subunit a isoform 1	ATP6V0A1	Q93050	1			0	0	0	0	0	0	0	0	0	0	0	0	0	0	0	0	0	0	0	0	0	0	0	0	0	0	0	0	0	0	0	0	0	0	0
V-type proton ATPase catalytic subunit A	ATP6V1A	P38606	4			0	6.94629e-05	0	3.25313e-05	0	3.00951e-05	2.09795e-05	0	0	0	0	0	0	3.60476e-05	0	8.65258e-05	0	1.93737e-05	0	0	0	0	6.62857e-06	0	0	0	0	0	0	2.87427e-05	0	0	3.17858e-05	0	0
V-type proton ATPase subunit B, brain isoform	ATP6V1B2	P21281	8			0	2.18287e-05	0	7.45784e-05	0	4.09735e-05	0	5.74577e-05	0	0	1.11166e-05	0	0	0	0	3.62342e-05	0	2.24255e-05	2.81662e-05	0	3.04888e-05	0	4.62e-05	1.58297e-05	0	5.0813e-05	0	0	0	7.30002e-05	0	0	5.55074e-05	4.77043e-05	0
V-type proton ATPase subunit D	ATP6V1D	Q9Y5K8	2			0	0	0	0	0	0	0	0	0	0	0	0	0	0	0	0	0	0	0	0	0	0	0	0	0	0	0	0	0	0	0	0	3.96895e-05	0	0
V-type proton ATPase subunit E 1	ATP6V1E1	P36543	10			0	8.02322e-05	6.05306e-05	0	0	8.86021e-05	0	0.000147934	0.000260388	0	2.08354e-06	7.14818e-05	0	0	0	0.000149429	0	5.01469e-05	0	0.000125342	1.82338e-05	0	0	1.52921e-05	5.0622e-05	0	0	0	0	4.31056e-05	0	0	0.000248731	1.39668e-06	1.53042e-05
V-type proton ATPase subunit G 1	ATP6V1G1	O75348	7			6.90933e-05	4.85117e-05	0	7.98624e-05	0	9.37904e-05	8.97206e-05	0.000191393	1.79695e-05	0	0	0	0.000185118	3.1431e-05	0	2.09649e-05	0	0.000101678	2.02971e-05	0	4.18311e-05	2.25343e-05	0	2.2045e-05	0	5.19533e-05	0	0	0	8.95872e-05	0	0.000136899	0.000184803	2.093e-05	0
V-type proton ATPase subunit H	ATP6V1H	Q9UI12	1			0	0	0	0	0	0	0	0	0	0	0	0	0	0	0	0	0	0	0	0	0	0	0	0	0	0	0	0	0	0	0	0	0	0	0
Phospholipid-transporting ATPase IC	ATP8B1	O43520	3			0	0	0	0	0	0	0	0	0	0	5.63201e-06	0	0	0	0	0	0	0	0	0	2.88732e-06	0	0	0	0	0	0	0	2.93985e-05	0	0	0	0	0	0
ATPase inhibitor, mitochondrial	ATPIF1	Q9UII2	15			0	9.45203e-05	0	0.000939894	0.000584857	0.000259657	0.000485727	0.000970566	0.000423099	0	0.000533983	0.000169487	0.000990451	0.000456757	0	0.000195356	0.000297532	0.000389492	0.000234851	0	0.000627805	3.12389e-05	0.000559638	0.000411972	0.000847078	0.000623426	0.000313066	0	0.000891111	0.00118586	4.47295e-05	0.000315153	0.000214997	0.000151425	0.000353507
Methylglutaconyl-CoA hydratase, mitochondrial	AUH	Q13825	5			0	0	0	0	0	0.000127172	0	6.37658e-06	0	0	0	0	0	1.47683e-05	0	0	0	0	0	0	0	0	0	0	0	0	0	0	0	0	0	0	4.66571e-05	0	0
Zinc-alpha-2-glycoprotein	AZGP1	P25311	10			0	7.59082e-05	0	0	0	0	4.66785e-05	3.01493e-05	0	0	0	9.37998e-05	0	0	0	0	5.50057e-05	0	0	0	0.000198479	0.000736819	6.69631e-06	0.00023437	0	0	0	0	5.64454e-05	2.42187e-05	4.90614e-05	6.9355e-05	0	8.3027e-06	0.00012595
Azurocidin	AZU1	P20160	1			0	0	0	0	0	0	0	0	0	0	0	0	0	0	0	0	0	1.75948e-05	0	0	0	0	0	0	0	0	0	0	0	0	0	0	0	0	0
Beta-2-microglobulin;Beta-2-microglobulin form pI 5.3	B2M	P61769	4			0.000268109	0.000458497	0	0.000243395	0.00033826	0.000264904	0.000483518	0.000240458	0.00027728	0	0	0	0.00034606	7.01167e-05	0	0	0.000114467	0.000247487	0.000391153	0.000226109	0.000221367	0.000156872	0.000127478	0.000593289	0.000363394	0.000170096	0.000113385	0	0.000445147	0.000211817	4.89244e-05	0.000111913	0.000103583	0.000274516	0.000229622
Beta-1,3-galactosyltransferase 5	B3GALT5	Q9Y2C3	2			0	0	0	0	0	0	0	0	0	0	0	0	0	0	0	0	0	0	0	0	0	0	3.79783e-06	0	0	0	0	0	2.08132e-05	0	0	0	0	7.61168e-06	0
BRISC and BRCA1-A complex member 1	BABAM1	Q9NWV8	2			0	0	0	0	0	0	0	0	0	0	0	0	0	0	0	0	0	0	0	0	0	0	0	0	0	0	0	0	0	0	0	0	0	0	0
Barrier-to-autointegration factor;Barrier-to-autointegration factor, N-terminally processed	BANF1	O75531	3			0	0	0	0	0	0	0	0	0	0	0	0	0	0	0	0	0	0	0	0	6.45037e-05	7.92365e-06	0	5.09831e-05	0	0	0	0	3.03644e-05	0	0	0	0	1.16848e-05	0
Brain acid soluble protein 1	BASP1	P80723	10			0	2.6068e-05	0	0	0	0	2.67733e-05	0	0	0	0	0	0	0	0.000195077	0	0.000121101	0	2.61364e-05	0.000331512	0	0.000193507	2.585e-05	3.35068e-05	0	0	7.90677e-05	0	0	0.000106668	4.49624e-05	0	0	2.6351e-05	0
Apoptosis regulator BAX	BAX	Q07812	3			0	0	0	0	0	0	0	0	0	0	1.89208e-06	0	0	0	0	0	0	0	0	0	0	0	0	0	0	0	0	0	0	2.75482e-05	0	0	3.03025e-05	8.82149e-06	0
B-cell receptor-associated protein 29	BCAP29	Q9UHQ4	1			0	0	0	0	0	0	0	0	0	0	0	0	0	0	0	0	0	0	0	0	0	0	0	0	0	0	0	0	0	0	0	0	0	0	0
B-cell receptor-associated protein 31	BCAP31	P51572	19			0.000188412	6.44721e-05	0	0.000170643	0.000107035	0.000147448	6.06415e-05	8.43433e-05	0	0	0.000150578	0.000102919	0.000166813	0.000303723	0	0.000198251	0.000302248	0.000162053	0.000104554	0	0.000176674	2.04424e-05	9.08774e-05	6.06931e-05	0	0.00114544	0.000174996	0	0.000492253	5.3942e-05	7.78581e-05	7.99227e-05	5.68058e-05	0.000241971	6.29314e-05
Breast carcinoma-amplified sequence 1	BCAS1	O75363	37			9.98983e-05	0.000512637	0.000351985	0.00135689	0.00101951	0.000729016	4.98612e-05	0.000318985	0	0	0.000175117	0.000302072	0.000380122	0.000455151	0.00060433	0.000462202	0.00037886	0.000367634	0.00139433	0.00214672	0.000993719	0.000187043	0.000366821	0.000262392	0	0.00113486	0.000956214	0	0.000512834	0.000800355	0.00164692	0.00117408	7.41313e-05	0.000707767	0.000426158
Branched-chain-amino-acid aminotransferase, mitochondrial	BCAT2	O15382	2			0	0	0	0	0	0	0	0	0	0	7.64297e-06	0	0	0	0	0	0	0	0	0	0	0	0.00060635	1.78963e-05	0	0	0	0	0	0	0	0	0	0	0
2-oxoisovalerate dehydrogenase subunit alpha, mitochondrial	BCKDHA	P12694	1			0	0	0	0	0	0	0	0	0	0	0	0	0	0	0	0	0	0	0	0	0	0	0	1.95933e-06	0	0	0	0	0	0	0	0	0	0	0
Bcl-2-associated transcription factor 1	BCLAF1	Q9NYF8	5			8.25092e-05	0	7.13673e-05	3.75419e-05	3.63321e-05	0	2.52294e-05	6.44661e-05	8.39222e-05	0	0	0	0	0	0	0	0	0	0	0	3.70598e-05	0	0	7.31372e-06	0	1.19694e-05	0	0	0	0	0	0	3.97835e-05	0	0
D-beta-hydroxybutyrate dehydrogenase, mitochondrial	BDH1	Q02338	6			0	1.08857e-05	0	0	0	0	0	0	0	0	1.33926e-05	0	0	0	0	0	0	0	0	0	8.08616e-06	0	3.19035e-05	1.07285e-05	0	0	0	0	4.93423e-06	0	0	0	0	0	0
Biglycan	BGN	P21810	8			0	0	0	0	0	0	0	0	0	5.68342e-05	0	0	0	0	0	0	0	0	0	0	0	0	0	0	0	0	0	0	0	0	0	0	0	0	0
BH3-interacting domain death agonist;BH3-interacting domain death agonist p15;BH3-interacting domain death agonist p13;BH3-interacting domain death agonist p11	BID	P55957	1			0	9.92969e-06	0	0	0	0	0	0	0	0	0	0	0	0	0	0	0	0	0	0	0	0	0	0	0	0	0	0	0	0	0	0	0	0	0
Biogenesis of lysosome-related organelles complex 1 subunit 2	BLOC1S2	Q6QNY1	1			0	0	0	0	0	1.85264e-05	0	2.65924e-05	0	0	0	0	0	0	0	0	0	9.42172e-06	0	0	0	0	0	0	0	0	0	0	0	1.75829e-05	0	1.91391e-05	0	0	0
Flavin reductase (NADPH)	BLVRB	P30043	10			6.83112e-05	0.000706912	0	6.22516e-05	0.000254856	0.000382714	0.000158781	0.00031097	8.85844e-05	0	0.000329206	0	6.73551e-05	0.000683833	0	6.35911e-05	0	0.00111727	9.01065e-06	0	0.000118461	0.000109496	0.000474604	0.000321257	0	0	6.90184e-05	0	0	0.000468797	0	8.97626e-05	0.000112433	7.56233e-05	0.000194483
BolA-like protein 2	BOLA2	Q9H3K6	3			0	1.28252e-05	0	0	0	0	0	3.43251e-05	0	0	0	0	0	0	0	0	0	0	0	0	2.21166e-06	0	4.3576e-06	2.4041e-06	0	0	0	0	0	0	0	0	1.90497e-05	2.08234e-06	0
Bisphosphoglycerate mutase	BPGM	P07738	4			0	0	0	0	0	0	0	0	0	0	8.09554e-06	0	0	0	0	0	0	0	0	0	0	0	0	1.58367e-05	0	0	0	0	0	0	0	0	0	1.71599e-05	1.40924e-05
Valacyclovir hydrolase	BPHL	Q86WA6	1			0	0	0	0	0	2.30927e-05	0	0	0	0	0	0	0	0	0	0	0	0	0	0	0	0	0	0	0	0	0	0	0	0	0	0	0	0	0
3(2),5-bisphosphate nucleotidase 1	BPNT1	O95861	3			0	0	0	0	0	0	0	0	0	0	0	0	0	0	0	0	0	0	0	0	0	0	0	0	0	0	0	0	0	0	0	0	0	0	2.27628e-05
Protein BRICK1	BRK1	Q8WUW1	1			0	0	0	0	0	0	0	0	0	0	0	0	0	0	0	0	0	0	0	0	0	0	0	0	0	0	0	0	0	0	0	0	1.6512e-05	0	0
Basigin	BSG	P35613	7			0	0.00010005	0.000129785	0.000168669	0.000262265	0.000126294	0.000116746	0.000202018	0	0	0.000113096	0.00027144	0.000177711	8.839e-05	0	0.000270217	0.000304949	0.000242886	6.65225e-05	0.000155885	5.51185e-05	0	8.14951e-05	5.62403e-05	0.000587391	0.000214275	0.000586403	0	0.000245467	0.000194925	6.28898e-05	0.000205243	7.06523e-05	0.000108436	5.68085e-05
Transcription factor BTF3	BTF3	P20290	4			0	0	0	0	0	0	0	0	0	0	0	0	0	0	0	0	0	0	0	0	4.70275e-05	0	0	1.55425e-05	0	0	0	0	1.92584e-05	0	0	0	6.33382e-05	1.57306e-05	0
Mitotic checkpoint protein BUB3	BUB3	O43684	2			0	0	0	0	0	0	0	0	0	0	1.13519e-05	0	0	0	0	0	0	0	1.62239e-05	0	0	0	0	0	0	0	0	0	0	1.38695e-05	0	0	0	1.9716e-05	0
Ester hydrolase C11orf54	C11orf54	Q9H0W9	2			0	6.08427e-05	0	2.22699e-05	5.71734e-05	4.19946e-05	0	0	0	0	0	0	0	0	0	0	0	0	0	0	0	0	0	5.1706e-07	0	0	0	0	0	0	0	0	4.40877e-05	0	0
Uncharacterized protein C14orf142	C14orf142	Q9BXV9	2			0	0	0	0	0	0	0	0	0	0	0	0	0	0	0	0	0	0	0	0	1.3452e-06	0	0	2.36668e-06	0	0	0	0	0	0	0	0	0	5.68828e-07	0
UPF0317 protein C14orf159, mitochondrial	C14orf159	Q7Z3D6	3			0	0	0	0	0	1.02599e-05	0	0	0	0	3.98343e-06	0	0	0	0	3.82728e-05	0	0	0	0	7.37404e-07	0	3.06369e-05	0	0	1.5156e-05	0	0	1.70504e-05	0	0	0	0	0	0
UPF0568 protein C14orf166	C14orf166	Q9Y224	4			0	0	0	0	0	1.09279e-05	0	2.30115e-05	0	0	1.36016e-05	0	0	3.84579e-05	0	0	0	2.71083e-05	0	0	4.17114e-05	0	8.49093e-06	0	0	3.23059e-05	0	0	6.07677e-06	5.57704e-06	0	0	0	9.3534e-06	0
UPF0587 protein C1orf123	C1orf123	Q9NWV4	2			0	0	0	0	0	0	0	0	0	0	0	0	0	0	0	0	0	0	0	0	7.04938e-06	0	5.50324e-06	1.14742e-05	0	0	0	0	0	0	0	0	0	7.4174e-06	0
Complement component 1 Q subcomponent-binding protein, mitochondrial	C1QBP	Q07021	9			0	0	0	0	0	9.12552e-05	0	2.83781e-05	0	0	4.91333e-05	0	0	9.88728e-06	0	0	0	5.99883e-05	0	0	0.00017951	9.90572e-05	3.76671e-05	0.000166704	0	1.00769e-05	0	0	0.000241251	0	0	5.39438e-05	3.72775e-05	6.19447e-05	4.20577e-06
Complement C1q subcomponent subunit C	C1QC	P02747	3			0	0.000124923	0	0	0	1.22998e-05	6.1331e-05	0	0	0	0	0	0	2.26165e-05	0	0	0	0	0	0	1.74594e-05	0	0	0	0	0	0	0	0	3.72726e-05	0	0	0	0	0
Complement C1s subcomponent;Complement C1s subcomponent heavy chain;Complement C1s subcomponent light chain	C1S	P09871	2			0	2.07508e-05	0	0	0	0	0	0	0	0	8.25199e-06	0	0	0	0	0	0	0	0	0	0	0	0	0	0	0	0	0	0	0	0	0	0	0	0
ES1 protein homolog, mitochondrial	C21orf33	P30042	12			0	0	0.000505672	0.000713282	0.000610743	0.000651663	0.000562147	0.000116529	0	0	0.000166081	0.000476526	0.000408582	0.000293527	0	0.000981907	0.000442357	0.000286353	5.5324e-05	0	3.77989e-05	0	0.000258383	0.000188549	0	0.000160905	0.000455628	0	0.000166162	0.000175134	0.000125889	0	9.27817e-05	4.73593e-05	0.000195002
Complement C3;Complement C3 beta chain;C3-beta-c;Complement C3 alpha chain;C3a anaphylatoxin;Acylation stimulating protein;Complement C3b alpha chain;Complement C3c alpha chain fragment 1;Complement C3dg fragment;Complement C3g fragment;Complement C3d fragment;Complement C3f fragment;Complement C3c alpha chain fragment 2	C3	P01024	70	Immune response	Immune response	0	0.00123019	0	9.81737e-05	0.000476328	0.00026412	0.00150947	0.000139417	0.00010752	0	0.00144497	0	0.000211314	0.000277842	9.10225e-05	9.63169e-05	0.000152216	0.0011613	0.000931728	0.000151837	0.00230213	0.00184251	0.00094154	0.00569492	0	9.88837e-05	0	0.000522421	0.000308845	0.00127472	0.00245701	6.79891e-05	0.00011164	0.00263983	0.00332622
Complement C4-B;Complement C4 beta chain;Complement C4-B alpha chain;C4a anaphylatoxin;C4b-B;C4d-B;Complement C4 gamma chain;Complement C4-A;Complement C4 beta chain;Complement C4-A alpha chain;C4a anaphylatoxin;C4b-A;C4d-A;Complement C4 gamma chain	C4B;C4A	P0C0L5;P0C0L4	16	Immune response		0	0	0	0	0	0	0	0	0	0	0	0	0	1.11976e-05	0	0	0	0	0	0	8.70317e-06	0	1.46256e-05	0.000145836	0	0	0	0	8.44154e-06	1.32291e-05	7.25838e-05	0	0	2.64933e-05	1.78093e-05
C4b-binding protein alpha chain	C4BPA	P04003	11			0	0	0	0	0	0	0	0	0	0	2.8713e-05	0	0	0	0	0	0	0	5.08041e-05	0	5.89941e-06	1.67205e-05	0	6.44173e-05	0	0	0	0	0	0	3.63864e-05	0	0	0	0
Complement component C6	C6	P13671	1			0	0	0	0	0	0	0	0	0	0	0	0	0	0	0	0	0	0	0	0	0	0	0	1.22185e-05	0	0	0	0	0	0	2.01071e-05	0	0	0	0
Complement component C9;Complement component C9a;Complement component C9b	C9	P02748	2			0	0	0	0	0	0	0	0	0	0	0	0	0	0	0	0	0	0	0	0	0	0	0	4.39875e-05	0	0	0	0	0	0	0	0	0	0	0
Protein PAXX	C9orf142	Q9BUH6	1			0	0	0	1.33222e-05	0	0	3.0695e-05	2.92162e-05	0	0	0	0	0	8.10226e-06	0	0	0	1.62448e-05	0	0	0	0	0	0	0	0	0	0	0	1.5587e-05	0	1.92843e-05	0	0	0
Carbonic anhydrase 1	CA1	P00915	24			0.000315323	0.0061627	0	0.00195538	0.00238235	0.00618764	0.00048795	0.00393892	0.00211576	0	0.00764542	0.000347328	0.000415729	0.00176112	0	0.000832532	0.000111267	0.00606128	0.00445641	0	0.00807331	0.00211131	0.00929769	0.00545526	0.000229222	0.00577258	0	0.00343172	0.00366464	0.006994	0.0051626	0.00194716	0.00219868	0.0136733	0.00669692
Carbonic anhydrase 12	CA12	O43570	4			0	1.24334e-05	0	0	0	2.45006e-05	0	3.2124e-05	0	0	1.39056e-05	0	0	0	0	0	0	2.07476e-05	0	0	0	0	0	8.93871e-06	0	0.000121499	0	0	2.18868e-05	2.00066e-05	0	2.44082e-05	1.44455e-05	9.75562e-05	2.06589e-05
Carbonic anhydrase 2	CA2	P00918	22			0.000886554	0.00347073	0.000845729	0.00128307	0.00211731	0.00288252	0.000199167	0.00272447	0.00166751	0	0.00270121	0.00080182	0.00040878	0.00163501	0	0.00028769	0.000326284	0.00260925	0.00570485	0	0.00255969	0.000325368	0.00387465	0.000835617	0	0.00331249	0.00104405	0.00407077	0.000918491	0.00185712	0.00308654	0.000994496	0.00238843	0.00554021	0.00443787
Carbonic anhydrase 4	CA4	P22748	6			0	0	0	0	0	0	0	0	0	0	3.91359e-05	0	0	2.14819e-05	0	4.51723e-05	0	5.1118e-05	0.000206472	0	5.33912e-05	0	6.8485e-05	3.79652e-05	0	0.000380874	0	0	0.000172449	6.60578e-05	3.67371e-05	0	0	5.12045e-05	0
Calcyclin-binding protein	CACYBP	Q9HB71	7			0	0	0	0	0	1.63443e-05	0	5.21171e-05	0	0	0	0	0	0	0	0	5.8629e-05	1.80851e-05	0	0	0	0	0	0	0	0	0	0	0	3.39521e-05	0	0	2.02066e-05	1.27954e-05	0
Caldesmon	CALD1	Q05682	63			0	0.000145622	0	0	0	0	0	0	0	0.0108694	0.000127384	0	0	0	0	0	0	0	3.02154e-05	0	0.000273435	0.000940601	7.91546e-05	5.9326e-05	0	0	0	0	6.33571e-05	1.86137e-05	0	0	0	0	0
Calmodulin	CALM1	P62158	18			0.00196546	0.000524487	0.000379674	0.000706352	0.000488665	0.00163402	0.000638092	0.00129627	0.000798331	0	0.00246664	0.000708656	0.00103272	0.000412717	0	0.000760509	0.000170154	0.00144118	0.00523287	0	0.00374695	0.00542217	0.00257296	0.00257543	0.000412828	0.00302888	0.000753946	0.00236034	0.00365814	0.00240332	0.00285036	0.00185573	0.000706576	0.00417619	0.00163827
Calmodulin-like protein 3	CALML3	P27482	5			0	6.03313e-05	0	0	0	0	0	3.59898e-05	0	0	0	0	0	0	0	0	0	0	0	0	0	0	0	0	0	0	0	0	0	7.49897e-06	0	0	0	0	0
Calmodulin-like protein 4	CALML4	Q96GE6	2			0	0	0	0	0	2.71036e-05	0	0	0	0	0	0	0	0	0	0	0	0	1.16684e-05	0	0	0	0	0	0	2.80775e-05	0	0	1.89371e-05	0	0	0	0	0	0
Calmodulin-like protein 5	CALML5	Q9NZT1	11			0.000105337	0.00139069	0	0	0	1.81844e-05	6.17807e-05	0.00171678	0.000102063	0	0	0	4.43201e-05	5.9174e-05	0	0	0	0	1.93631e-05	0	3.79098e-05	0.0020582	0	0	0	0	5.30962e-05	0	2.22118e-05	3.90688e-05	3.85893e-05	0.000169542	0	0	0
Calreticulin	CALR	P27797	30			0.000559721	0.000355572	0.00107877	0.000934395	0.000456324	0.000792632	0.000394272	0.00044854	0.000333895	0	0.00170863	0.000364058	0.000493384	0.000396099	0	0.000365175	0.0008655	0.00108948	0.00159689	8.00624e-05	0.00201773	0.000625977	0.00157332	0.00156707	0.000436023	0.00274438	0.000545442	0.000173773	0.00356173	0.000595457	0.00132046	0.000683576	0.000376177	0.00199492	0.0013395
Calumenin	CALU	O43852	8			0.000106717	0	7.50971e-05	6.73171e-05	6.22416e-05	4.09711e-05	5.97871e-05	0	8.577e-05	0	9.15205e-05	0	8.698e-05	0	0	4.58428e-05	0.000126084	0	4.56801e-05	0	8.72326e-05	0	6.6685e-05	4.00214e-05	0	0.00010448	0.000136554	0	6.8272e-05	0.000119251	4.31239e-05	9.95395e-05	4.16926e-05	6.74791e-05	5.59424e-05
Calcium/calmodulin-dependent protein kinase type II subunit delta	CAMK2D	Q13557	13			0	4.0218e-05	0	2.87211e-05	0	8.93804e-05	0	2.87445e-05	0	0	2.33025e-05	0	1.7449e-05	6.71988e-05	0	0.000183749	0	3.78542e-05	8.02347e-05	0	8.60998e-06	0	2.62093e-05	0	0	0.000136163	0	0	5.26022e-05	5.44316e-05	0	0	8.58352e-06	0.000117956	5.2642e-05
Cullin-associated NEDD8-dissociated protein 1	CAND1	Q86VP6	6			0	0	0	1.98283e-05	0	0	0	0	0	0	0	0	0	0	0	1.87931e-05	0	0	0	0	0	0	6.32032e-06	0	0	0	0	0	0	0	0	0	0	1.4702e-05	0
Calnexin	CANX	P27824	19			0	0	0	0.000252125	0	0	0	0	0	0	0.000229364	0	0	4.23087e-05	0	0	0	8.69811e-06	5.08256e-05	0	0.000203845	1.75841e-05	0.000240231	0.000149279	0	0.000941844	0	0	0.000470093	1.0132e-05	0.000232218	0	0	0.00053433	9.88249e-05
Adenylyl cyclase-associated protein 1	CAP1	Q01518	39	Bacterial adhesion; actin remodelling		0.000882343	0.000804757	0.00100129	0.000960533	0.000983244	0.00123063	0.000566244	0.00109453	0.00119853	0	0.00115025	0.000625846	0.000515259	0.000945317	0	0.00108732	0.00071003	0.00121615	0.00257966	0.000601913	0.00130134	0.000716067	0.00134994	0.00108804	0.00039638	0.0022923	0.000772841	0.00154344	0.000796584	0.00170366	0.00199711	0.000894211	0.000655061	0.00276837	0.00159072
Macrophage-capping protein	CAPG	P40121	16			0	0.000928688	0	4.13266e-05	0.000185407	0.000580819	9.54216e-05	0.000580672	0.000518927	0	0.000283685	0	0.000271285	0.000283482	0	9.19786e-05	0.000193344	0.000501646	0.000566292	0	0.000320329	0.000491282	0.000611905	0.000314506	0	0.000605842	0.000225688	0.00049826	0.000101508	0.000425529	0.00047538	9.9854e-05	0.000182267	0.000174692	0.00046892
Calpain-1 catalytic subunit	CAPN1	P07384	5			0	0	0	0	0	0	2.63896e-05	0	0	0	0	0	0	0	0	3.47693e-05	0	2.46082e-05	0	0	0	0	0	0	0	0	0	0	0	2.2152e-05	0	0	6.82171e-05	0	0
Calpain-2 catalytic subunit	CAPN2	P17655	5			0	0	0	0	0	3.91352e-05	0	0	0	0	1.4173e-05	0	0	0	0	0	0	0	0	0	0	0	0	0	0	1.33147e-05	0	0	0	0	6.72354e-06	0	0	0	1.78931e-05
Calpain-5	CAPN5	O15484	7			0	0	0	0	0	1.08489e-05	0	0	0	0	0	0	0	0	0	9.80886e-05	0	0	0	0	0	0	0	2.45881e-06	0	0	0	0	0	0	0	0	0	0	0
Calpain small subunit 1	CAPNS1	P04632	6			0	0	0	0	0	0	0	0	0	0	6.61998e-05	0	0	3.36287e-05	0	0	0	7.53379e-06	6.45464e-05	0	7.63723e-05	0	8.38768e-05	7.87742e-05	0	9.42714e-05	0	4.32839e-05	3.89404e-05	7.34667e-05	9.34292e-05	4.33972e-05	0	0.000119206	7.46815e-05
Caprin-1	CAPRIN1	Q14444	8			0	2.44787e-05	0	0	0	3.13839e-05	0	5.49006e-05	0	0	4.86759e-06	0	0	0	0	0	0	3.26395e-05	0	0	4.28482e-05	4.9799e-05	2.13158e-05	0	0	1.45805e-05	0	0	5.17441e-05	0	0	0	8.901e-05	0	0
F-actin-capping protein subunit alpha-1	CAPZA1	P52907	14			0.000636407	0.000345794	0.00040521	0.000347621	0.000567533	0.000573072	0.000404505	0.000350756	0.000561484	0.000221538	0.000225796	0.000453264	0.000327096	0.000416839	0	0.000475479	0	0.000232238	0.000328151	0	0.000289166	0.000139323	0.000266217	0.000203314	0.000175438	0.000451364	0.000234567	0	0.00026289	0.000342755	0.00031597	0.000170481	0.000665605	0.000294722	0.000134646
F-actin-capping protein subunit alpha-2	CAPZA2	P47755	9			0.00013279	7.91145e-05	0	0.000157544	9.41239e-05	0.00013752	0.000139045	0.000132445	0.000192153	0.000127297	1.80115e-05	0	8.32428e-05	4.52852e-05	0	9.20941e-05	0	8.61172e-05	1.16217e-05	0	2.59778e-05	2.26294e-05	0	0	0	9.40215e-06	0.00015303	0	1.60686e-05	0.000102879	1.11579e-05	0.0001154	0.000108355	2.27689e-05	4.27609e-06
F-actin-capping protein subunit beta	CAPZB	P47756	12			3.90354e-05	0.000445212	9.91796e-05	7.93389e-05	0.000266826	0.000535993	0.000177578	0.000249694	0.000215117	0	0.000180539	0	4.72407e-05	0.000229506	0	0.00031903	0	0.000214866	7.96692e-05	0	0.000259271	3.93856e-05	0.000168593	0.000227558	0	0.00011364	0.000124677	0	0.0001073	0.000333336	8.06255e-05	0	0.000138137	0.000551238	0.00011784
Calcium-regulated heat stable protein 1	CARHSP1	Q9Y2V2	2			0	0	0	0	0	0	0	0	0	0	0	0	0	0	0	0	0	0	0	0	0	0	0	0	0	0	0	0	0	0	0	0	0	0	0
Peripheral plasma membrane protein CASK	CASK	O14936	1			0	0	0	0	0	1.8343e-05	0	0	0	0	0	0	0	0	0	0	0	0	0	0	0	0	0	0	0	0	0	0	0	0	0	0	2.65815e-05	0	0
Caspase-1;Caspase-1 subunit p20;Caspase-1 subunit p10	CASP1	P29466	3	Inflammasome; immune response		0	0	0	0	0	0	0	0	0	0	0	0	0	0	0	0	0	1.38997e-05	0	0	9.80222e-06	0	0	0	0	0	0	0	0	0	0	0	2.13307e-05	1.17903e-05	1.69904e-05
Caspase-14;Caspase-14 subunit p17, mature form;Caspase-14 subunit p10, mature form;Caspase-14 subunit p20, intermediate form;Caspase-14 subunit p8, intermediate form	CASP14	P31944	5			0	2.6417e-05	0	0	0	0	0	2.85055e-05	0	0	0	0	0	0	0	0	0	0	0	0	2.35089e-06	6.86345e-05	0	0	0	0	0	0	0	0	0	0	0	0	0
Caspase-3;Caspase-3 subunit p17;Caspase-3 subunit p12	CASP3	P42574	4			6.2667e-05	2.58935e-05	0	2.7308e-05	0	0	0	1.99409e-05	0	0	0	0	0	2.7513e-05	0	0	0	2.25545e-05	0	0	0	0	0	0	0	0	0	0	0	3.58398e-05	0	0	2.87843e-05	0	0
Caspase-7;Caspase-7 subunit p20;Caspase-7 subunit p11	CASP7	P55210	3			0	0	0	0	0	0	0	1.6074e-05	0	0	0	0	0	0	0	0	0	0	0	0	0	0	0	0	0	0	0	0	0	0	0	0	0	6.53578e-07	0
Calpastatin	CAST	P20810	36			0.00135788	0.000606129	0.000724015	0.000594458	0.00092217	0.000456577	7.61604e-05	0.00062339	0.0014523	0	0.000280984	0.00158445	0.000569655	0.00025951	0.00128503	0.000490177	0.000282428	0.000463446	0.00183148	0.00249485	0.000610066	0.000495181	0.000630477	0.000246319	0.000295831	0.00103148	0.000795414	0	0.000162839	0.000967461	0.000434089	0.000208375	0.000341777	0.000398899	0.000312515
Catalase	CAT	P04040	24			0.000203871	0.000706169	0.000136638	0.000239316	0.00014565	0.000319211	0.000528821	0.000458799	0	0	0.00103617	0	0.00029192	0.000873747	0	0.000383665	0.000227856	0.00165238	0.000287296	0.000129173	0.00055488	0.000236448	0.000739506	0.00056876	0	0.000297242	0.000285343	0.000492012	0.000368247	0.000890924	0.00027657	0.000205693	0.00074275	0.000608158	0.000713162
Caveolin-1	CAV1	Q03135	3			0	0	0	0	0	0	0	0	0	0.000111014	0	0	0	0	0	0	0	0	0	0	0	0	0	0	0	0	0	0	0	0	0	0	0	0	0
Carbonyl reductase [NADPH] 1	CBR1	P16152	12			0	0.000170909	0	3.93305e-05	6.74072e-05	0.000134872	3.45272e-05	4.32801e-05	0	0	3.8092e-05	0	0	3.74903e-05	0	2.56447e-05	5.11435e-05	4.98596e-05	0	0	9.24225e-05	0	7.22641e-05	7.58094e-05	0	6.17847e-05	4.97821e-05	8.42318e-05	1.64741e-05	2.85674e-05	6.81642e-05	0	4.3794e-05	6.65812e-05	0.000147968
Carbonyl reductase [NADPH] 3	CBR3	O75828	3			0	0.000107848	0.000135673	5.25047e-05	0.000268121	6.10923e-05	0.000113179	3.76357e-05	0	0	0	0	3.56845e-05	8.70037e-05	0	7.12153e-05	0	0	0	0	0	0	0	0	0	0	0	0	0	2.26158e-05	0	0	0.00010147	0	0
Carbonyl reductase family member 4	CBR4	Q8N4T8	1			0	0	0	0	0	0	0	0	0	0	0	0	0	0	0	0	0	0	0	0	0	0	0	0	0	0	0	0	0	0	0	0	0	0	0
Chromobox protein homolog 3	CBX3	Q13185	9			0.000211549	4.17952e-05	0.000149366	4.73676e-05	6.90371e-05	1.44919e-05	5.07236e-05	0.000246981	0.000251051	0	5.30519e-05	0	8.172e-05	2.36557e-05	0.000190637	9.04023e-05	0.000141562	0.00015434	6.04975e-05	0	6.91771e-05	0.0001492	4.76084e-05	3.71016e-05	0	5.11209e-05	8.09961e-05	0	6.17856e-05	0.000201071	5.48646e-05	0.000110547	0.000250168	4.11554e-05	9.1981e-06
Chromobox protein homolog 5	CBX5	P45973	3			0	0	0	0	0	0	0	0	0	0	2.20384e-06	0	0	0	0	0	0	0	0	0	2.45622e-06	0	0	6.47492e-06	0	0	0	0	0	0	0	0	0	0	0
Coiled-coil and C2 domain-containing protein 1A	CC2D1A	Q6P1N0	3			0	0	0	0	0	0	0	1.64716e-05	0	0	0	0	0	0	0	0	0	7.75321e-06	0	0	6.00401e-07	0	0	0	0	0	0	0	0	0	0	0	0	0	0
Cell cycle and apoptosis regulator protein 2	CCAR2	Q8N163	5			0	0	0	0	0	1.32832e-05	0	3.35215e-05	0	0	0	0	1.03717e-05	0	0	5.18462e-05	0	8.24929e-06	0	0	3.95752e-05	0	0	0	0	5.99996e-05	0	0	0	0	0	0	8.5195e-05	0	0
Coiled-coil domain-containing protein 124	CCDC124	Q96CT7	3			0.000114374	1.78676e-05	0	0	0	0	0	4.16759e-05	9.11024e-05	0	0	7.62082e-05	0	0	0	0	4.89618e-05	0	0	0	0	0	0	0	0	0	0	0	0	0	0	0	2.01728e-05	0	0
Coiled-coil domain-containing protein 58	CCDC58	Q4VC31	5			0	2.36685e-05	0	0	0	3.75003e-05	0	6.38075e-05	0	0	0	0	3.561e-05	5.05938e-05	0	0	0	0	0	0	0	0	2.8746e-05	1.40741e-05	0	7.25266e-05	0	0	0	5.32591e-05	0	3.77674e-05	0	9.00369e-06	0
Coiled-coil domain-containing protein 6	CCDC6	Q16204	5			0	0	0	0	0	0	0	1.84004e-05	0	0	0	0	0	0	0	0	0	0	0	0	0	0	0	0	0	0	0	0	0	0	0	0	0	1.08972e-05	0
Bicaudal D-related protein 2	CCDC64B	A1A5D9	2			0	0	0	0	0	0	0	0	0	0	0	0	0	0	0	0	0	0	0	0	0	0	0	0	0	0	3.35862e-05	0	0	2.54299e-05	0	0	0	0	0
C-C motif chemokine 15;CCL15(22-92);CCL15(25-92);CCL15(29-92)	CCL15	Q16663	1			0	0	0	0	0	0	0	0	0	0	0	0	0	0	0	0	0	0	0	0	0	0	0	0	0	0	0	0	0	0	0	0	0	0	0
Copper chaperone for superoxide dismutase	CCS	O14618	2			0	0	0	0	0	0	2.27322e-05	1.88763e-05	0	0	0	0	0	0	0	0	0	1.5154e-05	0	0	0	0	0	0	0	0	0	0	0	0	0	0	0	0	0
T-complex protein 1 subunit beta	CCT2	P78371	27			0	0	0	0	4.04643e-05	0.000143805	0	7.24556e-05	3.49829e-05	0	5.5327e-05	4.12804e-05	0	1.70441e-05	0	4.9182e-05	3.05288e-05	7.5008e-05	3.52857e-05	0	4.28563e-05	0	4.40551e-05	2.04574e-05	0	0.00021693	0	0	3.88624e-06	6.97429e-05	0	0	0.000237533	0.000102723	7.96751e-05
T-complex protein 1 subunit gamma	CCT3	P49368	21			0	3.6896e-05	6.52756e-05	6.81909e-05	0	0.00010231	0	6.36604e-05	0	0	4.36899e-05	0	0	0.000105835	0	3.77364e-05	0	2.37921e-05	5.06751e-05	0	2.65867e-05	0	0.000135256	4.76499e-05	0	0.000131016	0	0	2.37759e-05	6.14733e-05	5.52454e-05	0	3.36421e-05	0.000189221	5.34656e-06
T-complex protein 1 subunit delta	CCT4	P50991	13			0	2.59246e-05	0	0	0	2.04632e-05	0	5.44414e-06	0	0	1.23789e-05	0	0	2.74327e-05	0	0	0	0	0	0	0	0	2.1207e-05	0	0	2.75442e-05	0	0	0	2.61618e-05	0	0	0.000109781	3.94914e-05	1.34068e-05
T-complex protein 1 subunit epsilon	CCT5	P48643	15			6.97946e-05	0.00011207	0	0.000103488	8.21732e-05	0.000170312	8.61082e-05	0.000149875	0	0	6.5652e-05	0	6.15517e-05	3.83234e-05	0	0.000167199	0.000101076	0.000112944	6.62279e-05	0	1.91055e-05	0	6.11602e-05	2.06231e-05	0	0.000109753	0.000219462	0	0	7.2615e-05	4.64803e-05	6.8407e-05	0.000194184	6.02592e-05	3.31949e-05
T-complex protein 1 subunit zeta	CCT6A	P40227	18			0	6.2603e-05	0	0	0	5.78596e-05	3.22199e-05	0.00016146	0	0	0.000104878	0	0	5.73907e-05	0	4.2655e-05	0	0	0	0	0.000120758	0	9.84494e-05	0.000126092	0	0.000118192	0	0	3.00003e-05	0	8.60232e-06	0	0.000366003	0.00015739	8.4303e-05
T-complex protein 1 subunit eta	CCT7	Q99832	11			0	8.11253e-06	0	0	0	0	0	0	0	0	4.77355e-05	0	0	6.60382e-06	0	0	0	0	1.06874e-05	0	0	0	4.18413e-05	1.97927e-06	0	6.00509e-05	0	0	0	0	4.17238e-05	0	2.62149e-05	5.7534e-05	0.000146989
T-complex protein 1 subunit theta	CCT8	P50990	22			0	0.000220948	0	8.11918e-05	5.64802e-05	0.00022894	0.00021566	0.000110799	0	0	5.54531e-05	0	0	0.000169406	0	0.000163682	5.87779e-05	0.000138977	0	0	9.79097e-05	0	0.000140763	7.23524e-05	0	0.000279659	9.54542e-05	0	1.55451e-05	0.000118973	1.0166e-05	9.61517e-05	0.000213265	0.000242507	2.86001e-05
CD151 antigen	CD151	P48509	2			0	0	0	0	0	0	0	0	0	0	1.00727e-05	0	0	0	0	0	0	0	0	0	0	0	0	0	0	1.70661e-05	0	0	0	0	0	0	0	0	0
CD177 antigen	CD177	Q8N6Q3	8			0	6.02743e-05	0	0	0.000541841	0.000257033	0.000177932	8.24991e-05	0	0	5.37871e-05	0	9.95841e-05	0	0	0.00032125	0.000445022	0.000284073	6.30499e-05	0	1.80121e-05	0	2.81347e-05	0	0	9.99369e-05	0	0	9.44923e-05	0.000264646	0.000132166	0.000201752	4.52572e-05	4.00464e-05	0
CD2-associated protein	CD2AP	Q9Y5K6	19			7.34993e-05	0.000100574	0	8.57866e-05	8.74238e-05	0.000217302	0	0.000310041	0.000110305	0	7.15294e-05	0	0.000161302	3.8703e-05	0	0	0	0.000162937	0.000250462	0	0.000124952	6.63036e-05	3.6289e-05	4.111e-05	0	0.000173307	0.000110029	0	8.88307e-05	0.000312849	0.000139068	0.000225175	8.08993e-05	8.36781e-05	7.30413e-05
CD44 antigen	CD44	P16070	2			0	0	0	0	0	0	0	0	0	0	0	0	0	0	0	0	0	0	0	0	1.1785e-05	0	0	1.87719e-05	0	0	0	0	0	0	0	0	0	0	0
Membrane cofactor protein	CD46	P15529	2			0	0	0	0	0	0	0	0	0	0	7.02831e-06	0	0	0	0	0	0	0	0	0	0	0	1.09938e-05	0	0	0	0	0	0	0	0	0	0	0	0
Leukocyte surface antigen CD47	CD47	Q08722	2			0	0	0	0	0	0	0	0	0	0	5.77678e-05	0	0	0	0	4.69573e-05	0	0	0	0	0	0	0	0	0	6.01313e-05	0	0	4.21947e-05	0	0	0	0	0	0
CD59 glycoprotein	CD59	P13987	3			0	0	0	0	0	0	0	0	0	0	4.08406e-05	0	0	0	0	0	0	0	0	0	0	0	0	0	0	0	0	0	0	0	0	0	0	0	0
CD5 antigen-like	CD5L	O43866	3			0	0	0	0	0	0	0	0	0	0	0	0	0	0	0	0	0	0	0	0	1.80169e-05	0.000187051	0	1.07772e-05	0	0	0	0	0	0	0	0	0	0	2.88951e-05
CD63 antigen	CD63	P08962	2			0	0	0	0	0	0	0	0	0	0	0	0	0	7.10192e-05	0	0	0	0	0	0	0	0	0	1.16627e-05	0	0	0	0	0	0	0	0	0	0	0
CD81 antigen	CD81	P60033	1			0	0	0	0	0	0	0	0	0	0	0	0	0	0	0	0	0	0	0	0	0	0	0	7.10219e-07	0	0	0	0	0	0	0	0	0	0	0
CD9 antigen	CD9	P21926	4			0	0	0	0.00033439	0	3.90108e-05	5.61647e-05	0	0	0	0.000189895	0	0.000222899	0.000265129	0	0.000168789	0.000964312	0	0.000303294	0	0.000225979	0	0.000255444	0.000256654	0	0.00140432	0.000767379	0	0.000435507	0.000571941	0.000335834	0.000151924	0	0.000555019	0.000185645
CD97 antigen;CD97 antigen subunit alpha;CD97 antigen subunit beta	CD97	P48960	2			0	0	0	0	0	1.32207e-05	0	1.28197e-05	0	0	0	0	0	0	0	0	0	7.17418e-06	0	0	0	0	0	0	0	0	0	0	1.20176e-05	0	0	0	0	0	0
CD99 antigen	CD99	P14209	3			0	0	0	0	0	2.17478e-05	0	0	0	0.000177838	0	0	4.92306e-05	3.24051e-05	0.000174994	0	0	0	0	0	5.75769e-05	0	0	0	0	1.45959e-05	7.04898e-05	0	3.42094e-05	0	0	3.20608e-05	2.47358e-05	0	0
Cytidine deaminase	CDA	P32320	2			0	0	0	0	0	2.4322e-05	0	2.46511e-05	0	0	0	0	0	0	0	0	0	2.27419e-05	3.10433e-06	0	0	0	0	0	0	0	0	0	0	1.93791e-05	0	0	0	0	0
Hsp90 co-chaperone Cdc37;Hsp90 co-chaperone Cdc37, N-terminally processed	CDC37	Q16543	19			0	0.00020001	0	7.70942e-05	0	0.000101885	0	0.000230908	0	0	4.76517e-05	0.000127528	0	5.27307e-05	0	0	9.65471e-05	0.000179414	8.29655e-05	0.00022322	0.000125651	2.85459e-05	7.1149e-05	2.62406e-05	0	4.26283e-05	0.000348196	0	1.4885e-05	0.000150033	2.64637e-05	9.91576e-05	0.000211353	6.9737e-05	3.5123e-05
Cell division control protein 42 homolog	CDC42	P60953	7	Bacterial adhesion; actin remodelling	Bacterial adhesion; actin remodelling	0	0	0	0	0	0.000161728	0	6.60003e-05	0	0	0.000164641	0	0	0.000239204	0	0	0	7.42253e-05	0.000178938	0.000368027	0.000212225	0	0.000341592	0.000150097	0	0.000538187	0	8.55599e-05	0.000129229	0.00014381	0.00043302	0	0	0.000232289	0.000315736
Cadherin-1;E-Cad/CTF1;E-Cad/CTF2;E-Cad/CTF3	CDH1	P12830	15			9.39294e-05	9.97063e-05	5.15352e-05	8.5071e-05	9.59471e-05	0.000308834	3.26036e-05	0.000292601	0	0	0.000167333	0	0	3.35549e-05	0	8.80444e-05	7.40655e-05	0.000151946	0.000136612	0	0.000257191	1.38933e-05	0.000184322	0.000149571	0	0.000103369	0.00049237	4.12438e-05	0.000131135	0.000180996	6.22186e-05	2.03617e-05	0.000212462	0.000236138	6.90495e-05
Cadherin-17	CDH17	Q12864	35			0.0014228	0.000431513	0.000557524	0.000423284	0.00201867	0.00328579	0.000276622	0.00147568	0.0030225	0	0.00115449	0.003282	0.000470565	0.00114144	0	0.00204419	0.00026564	0.00185326	0.00165256	0.00228192	0.00162977	0.000418745	0.0020911	0.0016143	0.00169357	0.00226307	0.00292833	0.000774882	0.00190077	0.00244996	0.00201665	0.000823625	0.000739042	0.00154581	0.000835183
Cadherin-related family member 5	CDHR5	Q9HBB8	2			0	0	0	0	0	0	0	0	0	0	0	0	0	0	0	0	0	0	4.50737e-06	8.37492e-05	0	0	0	0	0	2.08779e-05	0	0	1.91581e-05	0	0	0	0	0	0
CDK5 regulatory subunit-associated protein 3	CDK5RAP3	Q96JB5	2			0	0	0	0	0	1.61297e-05	0	0	0	0	0	0	0	0	0	0	0	0	0	0	0	0	0	0	0	0	0	0	0	0	0	0	0	0	0
Protein CDV3 homolog	CDV3	Q9UKY7	7			0	0	0	0	0	0	0	1.64445e-05	0	0	0	0	0	0	0	0	0	0	0	0	0	0	0	0	0	0	0	0	0	2.19986e-05	0	0	0	0	0
Carcinoembryonic antigen-related cell adhesion molecule 1	CEACAM1	P13688	6	Glycocalyx		0.000129505	0.00012357	0.00022282	0.000348592	0.000105147	0.000243674	7.8124e-05	0.000100223	0	0	3.19868e-05	0	0.000103806	0.000118862	0	0.000366582	0	0.00026742	6.38003e-06	0	1.94357e-05	0	1.46717e-05	1.15046e-05	0.000598228	2.63794e-05	0.000129721	0	0.000117514	4.22101e-05	0	9.78546e-05	3.3547e-05	2.47837e-05	0
Carcinoembryonic antigen-related cell adhesion molecule 5	CEACAM5	P06731	6			0.000374268	0.000229654	9.10006e-05	0.000704996	0.000667758	0.000601254	0.000291876	0.000290524	0.000391087	0	0.000106695	0.000954884	0.000454754	0.000503986	0.000270422	0.00160379	0.000337839	0.00078167	0.000243818	0	0.000110113	4.02064e-05	8.71534e-05	6.36719e-05	0.00216146	0.000623091	0.001611	0.000267872	0.000393695	0.000689311	0.000225423	0.00100079	1.9392e-05	8.02545e-05	7.8068e-05
Carcinoembryonic antigen-related cell adhesion molecule 7	CEACAM7	Q14002	8	Glycocalyx		0.00011386	0	0.000231163	0.000295421	0.000163754	7.15927e-05	5.46458e-05	0.000223758	0.000827144	0	8.93809e-05	0.00232579	0.000705758	0.000348392	0.000878532	0.000397843	0.000371718	0.000529801	0.00032127	0.00236685	0.00021396	0	0.000179958	0.000172608	0.0015698	0.000887644	0.0014074	0	0.000647948	0.000377145	0.00012952	0.000210581	5.34261e-05	0.000310721	0
Chymotrypsin-like elastase family member 3A;Chymotrypsin-like elastase family member 3B	CELA3A;CELA3B	P09093;P08861	2			0	0	0	0	0	0	0	0	0	0	0	0	0	3.76812e-05	0	0	0	0	0	0	0	0	0	0	0	0	0	0	0	0	0	0.000158758	0	0	0
Centromere protein V	CENPV	Q7Z7K6	2			0	0	0	0	0	1.38428e-05	0	0	0	0	0	0	0	1.98904e-05	0	0	0	0	0	0	0	0	0	0	0	0	0	0	0	0	0	0	0	0	0
Liver carboxylesterase 1	CES1	P23141	1			0	0	0	0	0	0	0	0	0	0	0	0	0	0	0	0	0	0	0	0	0	0	0	0	0	0	0	0	0	0	0	0	0	0	0
Cocaine esterase	CES2	O00748	14			0	0.00015083	6.6466e-05	0.000192069	5.85804e-05	0.000375197	7.08991e-05	0.000129982	0	0	0.000217437	0.000202454	9.65117e-05	0.000182507	0	0.000105993	0	0.000256397	0.000252462	0.000642519	0.000150853	0	0.000552596	0.000102821	0	0.000868521	0.000181862	0	0.00052071	0.000333993	0.000126859	3.86804e-05	0.000226545	0.000617294	0.000366511
Complement factor B;Complement factor B Ba fragment;Complement factor B Bb fragment	CFB	P00751	17		Immune response	0	9.38604e-05	0	0	0	0	3.91359e-05	0	0	0	1.89444e-05	0	0	0	0	0	0	0	8.7036e-05	0	0.000102481	0.000224332	0.000113738	0.000521167	0	0	0	0.000150184	1.17239e-05	0	5.94868e-05	0	0	9.23316e-05	0.000180052
Complement factor H	CFH	P08603	33			0	0.000104531	0	0	1.98047e-05	6.30084e-06	0.000177388	1.28688e-05	0	0	0.000233364	0	1.62196e-05	0	0	1.91617e-05	0	0	0.000187259	0	0.000267683	0.000159341	8.94869e-05	0.000510872	0	0	0	0	4.50831e-06	4.57806e-05	0.00013361	0	0	0.000165907	0.000104255
Complement factor H-related protein 1	CFHR1	Q03591	3			0	0	0	0	0	0	0	0	0	0	0	0	0	0	0	0	0	0	0	0	1.24936e-05	0	0	0	0	0	0	0	0	0	0	0	0	1.59574e-05	1.61031e-05
Complement factor I;Complement factor I heavy chain;Complement factor I light chain	CFI	P05156	2			0	0	0	0	0	0	0	0	0	0	0	0	0	0	0	0	0	0	3.22109e-05	0	0	5.48925e-05	0	1.51163e-05	0	0	0	0	0	0	7.18494e-06	0	0	0	0
Cofilin-1	CFL1	P23528	35	Bacterial adhesion; actin remodelling	Bacterial adhesion; actin remodelling	0.00943648	0.00621245	0.00629824	0.00448291	0.0051151	0.00732082	0.00310282	0.0076215	0.00745257	0.000876665	0.00789486	0.00585289	0.00604197	0.00397249	0.00412598	0.00163767	0.00587333	0.00367676	0.0144727	0.00697998	0.00790813	0.0106561	0.00911252	0.00396501	0.00308644	0.0109179	0.00817151	0.00484764	0.00720371	0.006333	0.0106288	0.00760003	0.00653117	0.00739272	0.00556273
Cofilin-2	CFL2	Q9Y281	13			0	0	0	0	0	0	0	0	0	0	0	0	0	0	0	0	0	0	0	0	0	3.32407e-05	0	1.03249e-05	0	0	0	0	0	0	0	0	0	0	0
Cingulin	CGN	Q9P2M7	70			0.00136831	0.000207629	0.00104646	0.000665903	0.00066866	0.000652253	0.000219413	0.000405414	0.00117086	0	5.27385e-05	0.000527807	0.00087263	0.000316892	0.000497566	0.00106055	0.000387615	0.00061103	0.000426031	0.00281083	0.000112202	0	0.000138897	4.22323e-05	0.000906576	0.000420504	0.00127648	0	0.000142817	0.000791954	0.000108502	0.00135187	0.000427724	0.000176503	0.000106464
Coiled-coil-helix-coiled-coil-helix domain-containing protein 1	CHCHD1	Q96BP2	2			0	0	0	0	0	0	0	3.31458e-05	0	0	0	0	0	0	0	0	0	0	0	0	0	0	0	0	0	0	0	0	0	0	0	0	0	0	0
Coiled-coil-helix-coiled-coil-helix domain-containing protein 2;Putative coiled-coil-helix-coiled-coil-helix domain-containing protein CHCHD2P9, mitochondrial	CHCHD2;CHCHD2P9	Q9Y6H1;Q5T1J5	3			0.000111291	1.83685e-05	0	0	7.54473e-05	4.9625e-05	0	9.97045e-05	0	7.06747e-05	5.06375e-05	0	0	3.6987e-05	0	0.000108675	0	0	0	0	5.10959e-05	0	4.75602e-05	0	0	4.61941e-05	0.000148248	0	1.7173e-05	7.2825e-05	0	6.13619e-05	0	0	2.67299e-05
MICOS complex subunit MIC19	CHCHD3	Q9NX63	24			0.00129577	2.36236e-05	0.000713105	0.000771545	0.000677744	0.000605558	0.000463163	0.000481479	0.00154305	0.000247233	0.000209295	0.000779611	0.00125057	0.000615539	0	0.000953222	0.00129918	0.000623084	0.000130056	0.00223945	0.000334525	1.90397e-05	0.000572352	0.000127403	0.00088922	0.000624407	0.00179828	0	0.00104487	0.000754548	0.000168241	0.00150814	0.000633582	0.000106761	0.000367856
Mitochondrial intermembrane space import and assembly protein 40	CHCHD4	Q8N4Q1	4			0	0	0	0	0	0	0	0	0	0	7.26006e-06	0	0	0	0	0	0	0	3.2514e-05	0	0	0	1.38884e-05	2.14056e-05	0	6.67362e-05	0	0	5.77512e-05	0	0	0	0	0	0
Choline dehydrogenase, mitochondrial	CHDH	Q8NE62	6			0	0	0	1.66858e-05	0	1.50313e-05	0	3.25122e-05	0	0	0	0	0	4.06252e-05	0	0	7.14871e-05	6.55018e-05	0	0.000106822	0	0	0	1.05966e-05	0	8.68431e-05	0	0	0	0	2.31119e-05	0	0	0	0
Chromogranin-A;Vasostatin-1;Vasostatin-2;EA-92;ES-43;Pancreastatin;SS-18;WA-8;WE-14;LF-19;Catestatin;AL-11;GV-19;GR-44;ER-37;GE-25;Serpinin-RRG;Serpinin;p-Glu serpinin precursor	CHGA	P10645	32			0.000263234	0.000100589	0.000191127	0.000781036	8.17738e-05	0.000353925	0.000745016	0.00119806	0	4.77474e-05	0.000800556	0.000381197	0.00106659	0.000132857	0.00451629	0.000140042	0.00172668	0.000187595	3.04068e-05	0.000995394	0.00108659	0.00102994	0.000530864	0.000956176	0	0.000834938	0.000478614	0	0.000550169	0.000547241	0.000114129	0.000671939	0.000452541	0.000497731	0.000207026
Charged multivesicular body protein 1a	CHMP1A	Q9HD42	6			0	7.58408e-05	0	0	0	1.25091e-05	0	1.45325e-05	0	0	2.35811e-06	0	0	7.28958e-06	0	0	0	0	0	0	3.56996e-06	0	0	1.46061e-06	0	0	6.12041e-05	0	0	6.39794e-05	0	0	2.98746e-05	2.05021e-06	0
Charged multivesicular body protein 1b	CHMP1B	Q7LBR1	9			6.86058e-05	1.67107e-05	0	5.44141e-05	0	0.00013512	0	0.000191299	5.26035e-05	0	0	0	0.000137675	0	0	3.51609e-05	0	6.08637e-05	0	0	0	0	0	0	0	0	7.03895e-05	0	0	5.97518e-05	0	0.000113243	0.000133394	0	0
Charged multivesicular body protein 2a	CHMP2A	O43633	9			0.000111691	4.92097e-05	5.37976e-05	6.62325e-05	0	5.63816e-05	3.54326e-05	0.00020947	0	0	8.42038e-06	0	6.0797e-05	1.80327e-05	9.93251e-05	2.24312e-05	0	3.40936e-05	2.95682e-05	0	3.77772e-05	0	3.0524e-05	0	0	3.27433e-05	0	0	1.19329e-05	5.61247e-05	0	3.89028e-05	9.05441e-05	1.13524e-05	6.04239e-06
Charged multivesicular body protein 2b	CHMP2B	Q9UQN3	4			7.60177e-05	2.56672e-05	0	0	0	2.98493e-05	0	2.82623e-05	6.36879e-05	0	0	0	8.06555e-05	0	0	0	9.08233e-05	0	0.000106203	0	0	0	0	0	0	0	0	0	0	2.63976e-05	0	6.77825e-05	0	0	0
Charged multivesicular body protein 3	CHMP3	Q9Y3E7	2			0	0	0	0	0	8.78121e-06	0	0	0	0	0	0	0	0	0	0	0	0	0	0	0	0	0	0	0	0	0	0	0	0	0	0	0	0	0
Charged multivesicular body protein 4a	CHMP4A	Q9BY43	2			0	0	0	0	0	0	0	2.76559e-05	0	0	0	0	0	0	0.00016285	0	0	2.40138e-05	0	0	8.15445e-06	0	0	0	0	0	0	0	0	2.38464e-05	0	0	0	0	0
Charged multivesicular body protein 4b	CHMP4B	Q9H444	15			0.000248282	8.5907e-05	0	0.000322157	0.000215744	0.000395797	9.4762e-05	0.000581215	0.000910945	3.88693e-05	4.07003e-05	0.000170903	0.000478695	0.000220525	0.00104523	9.32797e-05	0.000790021	0.000240669	0.000325678	0	0.000365617	0.000145913	0.000118281	0.000120472	0.000162639	0.00050186	0.0011966	0	0.00015409	0.000301098	0.000359699	0.000897401	0.00032518	0.000106231	9.22572e-05
Charged multivesicular body protein 5	CHMP5	Q9NZZ3	2			5.12546e-05	0	0	0	2.26413e-05	0	0	1.61137e-05	0	0	0	0	1.30344e-05	0	0	1.23976e-05	0	0	1.14333e-05	0	0	0	0	0	0	0	0	0	0	2.02308e-05	0	0	2.83015e-05	9.19115e-06	0
Charged multivesicular body protein 6	CHMP6	Q96FZ7	1			3.8222e-05	0	0	3.56129e-05	0	0	0	2.91108e-05	5.33641e-05	0	0	0	2.50029e-05	0	0	2.3952e-05	3.46906e-05	2.26753e-05	0	0	0	0	0	0	0	0	5.49555e-05	0	0	0	0	2.8119e-05	2.55652e-05	0	0
Chromatin target of PRMT1 protein	CHTOP	Q9Y3Y2	2			0	0	0	0	0	0	0	3.46904e-05	7.95748e-05	0	0	0	2.97804e-05	1.88794e-05	0	0	0	0	0	0	0	0	0	0	0	0	0	0	0	9.97973e-06	0	1.40799e-05	3.02962e-05	0	0
Cold-inducible RNA-binding protein	CIRBP	Q14011	2			0	0	0	0	0	0	0	0	0	0	0	0	0	0	0	0	0	0	0	0	2.11927e-05	0	2.10749e-06	1.90239e-05	0	0	0	0	7.0475e-06	0	0	0	0	3.07865e-06	0
CDGSH iron-sulfur domain-containing protein 1	CISD1	Q9NZ45	4			0	0	0	0	0	0	0	0	0	0	9.29107e-05	0	0	0	0	0	0	0	0.000101318	0	5.4671e-05	0	0.000102559	4.9647e-05	0	0.000222919	0	0	0.000187829	2.9633e-05	0.00010006	0	0	2.83926e-05	4.47044e-05
Cytoskeleton-associated protein 4	CKAP4	Q07065	41			0.000660887	0.000628379	0.000284182	0.00449271	0.000423306	0.000474883	0.000950718	0.00106426	0.000107751	0.000270809	0.00014156	0	0.000872136	0.00100919	0.000469264	0.00175707	0.00170181	0.000366541	1.76773e-05	0.000578605	0.000314698	0	0.000109725	5.83415e-05	0.00121729	0.00101974	0.00148526	0	0.000587301	0.000950543	0.000184669	0.00134675	0.00110827	0.000538006	0.000143744
Creatine kinase B-type	CKB	P12277	37			0.00628873	0.00832587	0.00440472	0.00542522	0.0044034	0.0135374	0.00323663	0.0072488	0.00284729	0.00030114	0.00674301	0.00571776	0.00488173	0.00818144	0	0.00700963	0.00131933	0.00868562	0.00449533	0.00092638	0.00693225	0.00209601	0.00933899	0.00499733	0.00140226	0.0050909	0.00516883	0.00248158	0.00178601	0.0067162	0.00377619	0.0057372	0.00555095	0.00795089	0.00573324
Creatine kinase U-type, mitochondrial	CKMT1A	P12532	35			0.000608616	0.00134279	0.00107072	0.00274666	0.00199206	0.00289295	0.00132485	0.00146671	0.00180232	0.00017948	0.00352117	0.000805037	0.00255887	0.00115244	0	0.00284048	0.00113121	0.00241554	0.00496903	0.000104562	0.00446904	0.000101862	0.00263704	0.000927372	0.00056983	0.00232956	0.000898471	0.000146867	0.00286072	0.00122246	0.000517383	0.000929661	0.00297499	0.00365535	0.0053501
Galectin-10;Galectin-16	CLC;LGALS16	Q05315;A8MUM7	2			0	0	0	0	0	0	0	0	0	0	0	0	0	0	0	0	0	0	0	0	0	0	0	0	0	0	0	0	0	0	0	0	0	0	0
Calcium-activated chloride channel regulator 1	CLCA1	A8K7I4	57			0.00785622	0.00155961	0.000508133	0.00523841	0.0122219	0.00196861	0.0022317	0.00213436	0.00421421	9.25998e-05	0.00160461	0.0050164	0.0129922	0.00585405	0.00837867	0.0175476	0.00464316	0.00476467	0.00100234	0.0141009	0.00189963	0.000724116	0.000942573	0.00459706	0.0222528	0.00247237	0.00298613	0.00171958	0.00188256	0.00313158	0.00412882	0.00524476	0.00145659	0.00224675	0.00361779
Calcium-activated chloride channel regulator 4;Calcium-activated chloride channel regulator 4, 110 kDa form;Calcium-activated chloride channel regulator 4, 30 kDa form	CLCA4	Q14CN2	16			9.09926e-05	0	7.5168e-05	0.000189851	0.000230027	0.000423106	6.5568e-05	5.42379e-05	0.000119626	0	3.22937e-05	0.000188463	0.000177194	0.000163735	0	0.000238534	0	0.000473001	0.000167101	0	5.57025e-05	0	5.52141e-06	8.82113e-06	0.000888811	0.00078442	0	0	0.000233728	9.4794e-05	0.000151738	0.000245668	5.06253e-05	8.03333e-05	0
Claudin-3	CLDN3	O15551	3			0	0	0	3.44864e-05	0	0	0	0	0	0	0	0	0	0	0	0	0	0	0	0	0	0	1.14495e-05	0	0	0	0	0	0	0	0	0	0	2.6884e-05	0
Claudin-7	CLDN7	O95471	1			0	0	0	0	0	0	0	0	0	0	0	0	0	0	0	0	0	0	0	0	0	0	0	0	0	0	0	0	0	0	0	0	0	0	0
Tetranectin	CLEC3B	P05452;CON__Q2KIS7	3			0	0	0	0	0	0	0	0	0	0	8.03549e-06	0	0	0	0	0	0	0	1.76923e-05	0	1.29579e-05	2.12397e-05	0	0.000159717	0	0	0	0	0	0	0	0	0	0	0
Chloride intracellular channel protein 1	CLIC1	O00299	17			0.000276386	0.000483321	9.15236e-05	0.000308448	0.00027763	0.0006394	0	0.000212789	0.000103248	0	0.000288203	0	6.10576e-05	9.54668e-05	0	0.000174028	0	0.000318828	0.000128452	0	0.000423694	4.59254e-05	0.000452728	0.000348851	0	0.000306123	9.15192e-05	7.95411e-05	0.000104662	0.000447369	0.000152135	0	0.000379272	0.000677417	0.000215368
Chloride intracellular channel protein 4	CLIC4	Q9Y696	4			0	0	0	0	0	1.11118e-05	0	0	0	0	0	0	0	0	0	0	0	0	0	0	1.18324e-05	0	2.21983e-05	1.53433e-05	0	0	0	0	0	8.16371e-06	0	0	0	0.000114548	1.55874e-05
Chloride intracellular channel protein 5	CLIC5	Q9NZA1	5			0	0	0	0	0	6.7619e-06	0	1.62525e-05	0	0	0	0	0	0	0	0	0	0	0	0	0	0	0	0	0	8.92776e-05	0	0	0	0	0	0	0	0	1.92111e-05
Chloride intracellular channel protein 6	CLIC6	Q96NY7	1			0	0	0	0	0	0	0	3.32136e-05	0	0	0	0	0	0	0	0	0	0	0	0	0	0	0	0	0	0	0	0	0	0	0	0	0	0	0
Clathrin interactor 1	CLINT1	Q14677	9			0	0	0	0.000115348	0	2.15368e-05	0	8.1732e-05	0	0	7.04704e-06	0	0	0	0	0	0	0	4.88818e-06	0	3.45387e-05	0	5.08244e-05	6.98293e-06	0	6.05329e-05	0	0	9.15407e-05	1.44351e-05	0	0	5.35402e-05	2.54101e-05	2.62591e-06
CAP-Gly domain-containing linker protein 2	CLIP2	Q9UDT6	5			0	0	0	0	0	1.45626e-05	0	0	0	0	0	0	0	0	0	0	0	0	0	0	0	0	0	0	0	0	2.37671e-05	0	0	0	0	0	0	0	0
ATP-dependent Clp protease proteolytic subunit, mitochondrial	CLPP	Q16740	4			0	0	0	0	0	2.3289e-05	0	0	0	0	0	0	0	0	0	0	0	0	0	0	0	0	0	2.32714e-05	0	0	0	0	0	2.09743e-05	0	0	0	3.85105e-05	0
Clathrin light chain A	CLTA	P09496	5			0.000326703	0.000120732	0.000469108	0.000224786	0.000256731	0.000126253	0.000158072	0.000255174	0.000299325	0.000243979	7.13967e-06	0.000396893	0.000272403	0.000108084	0.000572883	0.000173092	0.000365156	0.000150926	3.34881e-05	0.00119176	5.46935e-05	3.84331e-05	8.85026e-06	1.02802e-05	0	0	0.000385724	0	3.27401e-05	0.00020513	2.63467e-05	0.00024764	0.000181591	9.16385e-05	1.72948e-05
Clathrin light chain B	CLTB	P09497	13			0.000357231	0.000126417	0.000319515	6.40518e-05	0.000509803	0.000200776	0	0.000118522	0.000146751	0	0.000408095	0.000259292	9.55594e-05	0.000144911	0	0.000348901	0.000102298	0	0.0007181	0.000429996	0.000279284	0.000228164	0.000469063	0.000133141	0.000206591	0.000428024	0.000619789	0	0.000303142	0.000280353	0.000447624	0.000666996	0.000363182	0.000270069	0.000229197
Clathrin heavy chain 1	CLTC	Q00610	35			6.16633e-05	0.000166374	0.000332721	9.49197e-05	0	0.000765393	8.28606e-05	0.000108743	0.000134882	0	0.000265565	0	1.61109e-05	0.000106012	0.000246748	0.000429752	0	0.000143608	0.00023913	0	0.000209268	3.11429e-05	0.000183744	0.000338387	0.000189689	0.000395222	0	0	0.000105119	0.00022228	9.61609e-06	0	0.000328434	0.000469424	9.47823e-05
Clusterin;Clusterin beta chain;Clusterin alpha chain	CLU	P10909	12			0	0.000113236	0	0	5.01144e-05	0	0.00016681	0	0	0	4.15117e-05	0	0	0	0	0	0	8.72538e-05	1.49264e-05	0.000210776	0.000121819	1.27032e-05	0	0.000230905	0	0	4.22398e-05	0	4.66081e-05	3.09563e-05	2.20343e-05	0	0	0	7.01339e-05
Citrate lyase subunit beta-like protein, mitochondrial	CLYBL	Q8N0X4	5			0	1.82666e-05	0	3.5707e-05	3.68874e-05	7.78541e-05	0	0	0	0	2.80212e-05	0	2.6492e-05	4.39379e-05	0	2.82965e-05	0	3.33109e-05	9.99547e-06	0	1.36826e-05	0	2.98294e-05	2.2398e-06	0	2.17899e-05	3.75569e-05	0	2.2158e-05	3.46118e-05	1.11727e-05	4.2353e-05	0	1.44893e-05	7.5891e-06
Chymase	CMA1	P23946	2			0	0	0	0	0	0	0	0	0	0	0	0	0	0	0	0	0	0	0	0	0	2.53854e-05	0	0	0	0	0	0	0	0	0	0	0	0	0
N-acylneuraminate cytidylyltransferase	CMAS	Q8NFW8	10			0	1.35993e-05	0	0	0	3.41385e-05	0	3.76556e-05	0	0	3.0766e-05	0	0	5.53514e-05	0	0	0	1.50062e-05	5.89343e-05	0	1.44137e-05	0	6.82895e-05	1.1236e-05	0	4.61695e-05	0	0	0	0	8.20639e-05	0	2.13888e-05	0	2.49375e-05
Carboxymethylenebutenolidase homolog	CMBL	Q96DG6	7			0	0	0	0	0	6.79196e-06	0	0	0	0	0	0	0	0	0	0	0	0	0	0	0	0	0	0	0	0	0	0	0	0	0	0	0	0	0
COX assembly mitochondrial protein homolog	CMC1	Q7Z7K0	4			0.000367855	0.000109562	0.000692515	0.000286119	0.000362941	0.000203659	0.000189479	0.000139866	0	0	3.88422e-05	0.000496453	0.000362146	0.000148551	0	0.000172292	0.00018433	0	8.6808e-05	0	5.38853e-05	0	6.2963e-05	8.16039e-06	0.000141507	0.000100807	0.000281435	0	7.22749e-05	0.00024327	7.01068e-05	0.000278826	0.000167011	0	2.32454e-05
UMP-CMP kinase	CMPK1	P30085	17			0.000126804	0.000540432	0	7.51509e-05	0.000409423	0.000379477	0	0.000447684	0.000310603	0	7.34797e-05	0	0	0.000115541	0	0	0	0.000772417	0.000292779	0	0.000383163	5.71479e-05	0.000354127	8.87008e-05	0	0.000279637	4.51671e-05	0	1.08628e-05	0.000424897	0.000170101	0.000287565	0.000269375	0.000379229	0.000104228
Cellular nucleic acid-binding protein	CNBP	P62633	5			0	0	0	0	0	1.24743e-05	0	5.90253e-05	0	0	2.24168e-05	0	0	0	0	0	0	0	4.3074e-05	0	0	0	2.46695e-05	0	0	1.39173e-05	0	0	0	0	5.3859e-05	6.26873e-05	0	0	2.64479e-05
Cytosolic non-specific dipeptidase	CNDP2	Q96KP4	21			0	0.000180507	0	5.99015e-05	6.39785e-05	0.000184332	6.18656e-05	6.45496e-05	0	0	0.000111712	0	3.57604e-05	8.17255e-05	0	6.95901e-05	0	0.000109052	8.92529e-05	0	0.000170296	1.60326e-05	0.000288582	0.000145785	0	2.75464e-05	4.90854e-05	0	0	4.72417e-05	0.000105606	0	0.000113014	0.000342641	0.000119118
Calponin-1	CNN1	P51911	14			0	0	0	0	0	0	0	0	0	0.00163072	0	0	0	0	0	0	3.62393e-05	0	0	0	0	1.52533e-05	0	0	0	0	0	0	0	0	0	0	0	0	0
Calponin-2	CNN2	Q99439	3			0	1.4411e-05	0	0	0	2.37996e-05	0	1.54801e-05	0	0	0	0	0	0	0	0	0	1.24581e-05	0	0	3.59559e-05	0	3.92283e-05	0	0	3.32967e-05	0	0	3.46347e-05	1.24807e-05	4.34226e-05	0	0	0	0
Metal transporter CNNM4;Metal transporter CNNM2	CNNM4;CNNM2	Q6P4Q7;Q9H8M5	3			0	0	0	0	0	0	0	0	0	0	0	0	0	0	0	0	0	0	9.32567e-06	0	0	0	0	0	0	4.87066e-05	0	0	2.54142e-05	0	0	0	0	0	0
CCR4-NOT transcription complex subunit 3	CNOT3	O75175	2			0	0	0	0	0	0	0	0	0	0	0	0	0	0	0	0	0	0	0	0	0	0	0	0	0	0	0	0	0	0	0	0	8.94115e-06	0	0
Protein canopy homolog 2	CNPY2	Q9Y2B0	6			3.24708e-05	0	0	0.000123053	9.94067e-05	0.000154694	8.82667e-05	0.000113575	0	0	1.18696e-05	0	0.000138834	0.000105698	0	7.83155e-05	7.55678e-05	8.26521e-05	0	0	1.17014e-05	0	1.29143e-05	2.57773e-06	0.000161142	0	0.000181991	0	0	0.000207423	0	0.000171563	0.000112887	2.40375e-05	0
Protein canopy homolog 3	CNPY3	Q9BT09	2			0	0	0	0	0	0	0	0	0	0	0	0	0	0	0	0	0	0	0	0	0	0	0	0	0	0	0	0	0	0	0	0	0	0	0
Cytochrome c oxidase assembly factor 3 homolog, mitochondrial	COA3	Q9Y2R0	6			0	3.9121e-05	0	0	0	0.000159611	0	0.000108889	0	0	1.7042e-05	0	0	6.20615e-05	0	0	0	8.07244e-05	5.05246e-05	0	2.20218e-05	0	0	0	0	4.44871e-05	0	0	7.63725e-05	0.000197206	2.77666e-05	0	7.93832e-05	0	0
Cytochrome c oxidase assembly factor 6 homolog	COA6	Q5JTJ3	3			0	0	0	0	0	1.60077e-05	0	3.36916e-05	0	0	1.7138e-05	0	0	0	0	0	0	0	3.67006e-05	0	0	0	2.20461e-05	0	0	2.28315e-05	0	0	0	0	9.66459e-06	0	0	0	0
Conserved oligomeric Golgi complex subunit 3	COG3	Q96JB2	4			0	8.52989e-06	0	1.3445e-05	0	0	0	0	0	0	1.10441e-06	0	0	0	0	0	0	6.36219e-06	0	0	2.36527e-06	0	9.81259e-06	2.92144e-06	0	0	0	0	0	0	0	0	8.76577e-06	1.34223e-06	0
Collagen alpha-1(XII) chain	COL12A1	Q99715	4			0	0	0	0	0	0	0	0	0	0	0	0	0	0	0	0	0	0	0	0	0	0	0	0	0	0	0	0	0	0	0	0	0	0	0
Collagen alpha-1(XIV) chain	COL14A1	Q05707	36			0	2.26044e-05	0	0	0	0	0	0	0	0.00013138	1.25605e-05	0	0	0	0.000438403	0	0	0	0	0	1.69878e-05	0	0	1.90729e-05	0	0	0	0	0	0	0	0	0	2.91366e-05	0
Collagen alpha-1(XV) chain;Restin;Restin-2;Restin-3;Restin-4	COL15A1	P39059	2			0	0	0	0	0	0	0	0	0	0	0	0	0	0	0	0	0	0	0	0	0	0	0	0	0	0	0	0	0	0	0	0	0	0	0
Collagen alpha-1(XVIII) chain;Endostatin	COL18A1	P39060	4			0	0	0	0	0	0	0	0	0	0	0	0	0	0	0	0	0	0	0	0	0	0	0	0	0	0	0	0	0	0	0	0	0	0	0
Collagen alpha-1(I) chain	COL1A1	P02452	17			0	0	0	0	0	0	0	0	0	0.00549478	0	0	0	0	0.0168295	0	0.000744203	0	0	0	0	0	0	0	0	0	0	0	0	0	0	0	0	0	0
Collagen alpha-2(I) chain	COL1A2	P08123	14			0	0	0	0	0	0	0	0	0	0.0135182	0	0	0	0	0.0309133	0	0.0015523	0	0	0	0	0	0	0	0	0	0	0	0	0	0	0	0	0	0
Collagen alpha-1(XXVIII) chain	COL28A1	Q2UY09	2			0	0	0	0	0	0	0	0	0	0	0	0	0	0	0	0	0	0	0	0	0	0	0	0	0	0	0	0	0	0	0	0	0	0	0
Collagen alpha-1(III) chain	COL3A1	CON__P04258;P02461	1			0	0	0	0	0	0	0	0	0	0	0	0	0	0	0	0	0	0	0	0	0	0	0	0	0	0	0	0	0	0	0	0	0	0	0
Collagen alpha-1(IV) chain;Arresten	COL4A1	P02462	1			0	0	0	0	0	0	0	0	0	0	0	0	0	0	0	0	0	0	0	0	0	0	0	0	0	0	0	0	0	0	0	0	0	0	0
Collagen alpha-2(IV) chain;Canstatin	COL4A2	P08572	1			0	0	0	0	0	0	0	0	0	0.000621159	0	0	0	0	0.000186682	0	0.000104313	0	0	0	0	0	0	0	0	0	0	0	0	0	0	0	0	0	0
Collagen alpha-2(V) chain	COL5A2	P05997	2			0	0	0	0	0	0	0	0	0	0	0	0	0	0	0	0	0	0	0	0	0	0	0	0	0	0	0	0	0	0	0	0	0	0	0
Collagen alpha-1(VI) chain	COL6A1	P12109	32			0	0	0	0	0	0	0	0	0	0.0105102	0	0	0	0	0.000915066	0	0.000170609	0	0	0	0	0	0	0	0	0	0	0	0	0	0	0	0	0	0
Collagen alpha-2(VI) chain	COL6A2	P12110	28			0	0	0	0	0	0	0	0	0	0.00696064	0	0	0	0	0	0	0.000119585	0	0	0	0	0	0	0	0	0	0	0	0	0	0	0	0	0	0
Collagen alpha-3(VI) chain	COL6A3	P12111	90			0	0	0	0	0	0	0	0	0	0.0132003	0	0	0	0	0.00132329	0	0	0	0	0	0	0	0	0	0	0	0	0	0	0	0	0	0	0	0
Procollagen galactosyltransferase 1	COLGALT1	Q8NBJ5	2			0	0	0	0	0	0	0	0	0	0	0	0	0	1.29499e-05	0	0	0	0	0	0	0	0	0	0	0	0	0	0	0	0	0	0	0	0	0
Catechol O-methyltransferase	COMT	P21964	1			0	0	0	0	0	0	0	0	0	0	0	0	0	0	0	0	0	0	0	0	0	0	0	0	0	0	0	0	0	0	0	0	0	0	0
Coatomer subunit alpha;Xenin;Proxenin	COPA	P53621	19			0	2.99877e-05	0	6.00484e-05	0	0.000154246	0	6.99747e-05	0	0	6.63062e-06	0	0	4.37644e-05	0	5.84624e-05	0	6.07804e-05	5.94439e-05	0	8.82047e-06	0	2.88045e-05	9.89058e-06	0	5.1469e-05	0	1.22824e-05	1.20824e-05	4.76399e-05	2.72577e-05	0	4.34739e-05	6.93642e-05	1.75627e-05
Coatomer subunit beta	COPB1	P53618	13			0	0	0	0	0	3.20366e-05	0	0	0	0	5.06422e-05	0	0	0	0	2.84146e-05	0	0	2.62912e-05	0	6.71067e-05	0	5.96444e-05	2.96279e-05	0	0.000102822	0	0	7.99036e-05	0	0	0	3.94528e-05	0.000104818	0
Coatomer subunit beta	COPB2	P35606	11			0	0.000195398	0.000131945	0.000182303	0.000243427	0.000246686	0	5.40677e-05	0.000115265	0	3.75781e-05	0.000194377	6.68925e-05	0	0.000156453	0.000170956	0.000168906	0.000170629	6.59269e-05	0	8.15526e-05	0	7.35996e-05	5.47411e-05	0	0.000229565	6.34336e-05	0	5.15843e-05	2.12913e-05	6.7071e-05	0	0.000164064	0.000208581	5.45937e-05
Coatomer subunit epsilon	COPE	O14579	6			0	0	0	0	0	3.6169e-05	0	0	0	0	6.3631e-06	0	2.99206e-05	0	0	0	0	0	0	0	2.51422e-05	0	3.63723e-06	1.89457e-05	0	0	0	0	1.30074e-05	3.11651e-05	0	0	0	1.32847e-05	0
Coatomer subunit gamma-1	COPG1	Q9Y678	12			0	2.21984e-05	0	0	0	0.000241563	0	0.00013542	0	0	2.86198e-05	0	0	0	0	0	0	9.77416e-05	0	0	5.05118e-05	0	1.31091e-05	1.6712e-06	0	0	0	0	1.16139e-05	6.98589e-05	0	0	0.000164074	9.77872e-05	0
COP9 signalosome complex subunit 3	COPS3	Q9UNS2	1			0	0	0	0	0	0	0	0	0	0	0	0	0	0	0	0	0	0	0	0	0	0	0	0	0	0	0	0	0	0	0	0	0	0	0
COP9 signalosome complex subunit 4	COPS4	Q9BT78	3			0	0	0	0	0	0	0	0	0	0	0	0	0	0	0	0	0	0	0	0	0	0	0	0	0	0	0	0	0	0	0	0	0	0	0
Coatomer subunit zeta-1	COPZ1	P61923	2			0	0	0	0	0	0	0	0	0	0	0	0	0	0	0	0	0	0	0	0	9.09924e-06	0	0	7.60598e-06	0	0	0	0	0	0	0	0	1.75009e-05	5.20809e-06	0
Ubiquinone biosynthesis O-methyltransferase, mitochondrial	COQ3	Q9NZJ6	1			0	0	0	0	0	7.33792e-06	0	0	0	0	0	0	0	0	0	0	0	0	0	0	0	0	0	0	0	0	0	0	0	0	0	0	0	0	0
Ubiquinone biosynthesis protein COQ9, mitochondrial	COQ9	O75208	4			0	0	0	0	0	0	0	0	0	0	0	0	0	0	0	0	0	0	0	0	0	0	2.40713e-05	4.50536e-07	0	9.22966e-05	0	0	0	2.14149e-05	0	0	0	0	0
Coronin-1A	CORO1A	P31146	23			0	0.000283881	0	0	0	0.000112798	0.00151047	8.14825e-05	0	0	0.000418026	0	5.20874e-05	0.000125919	0	0	0.000135285	0.000404429	5.03074e-05	0	0.000124639	0.000174244	0.000334626	0.000210185	0	0.000106417	0.000613435	0	0.000112133	0.000316315	0.000193812	0	0.000116289	0.000113934	9.65924e-05
Coronin-1B	CORO1B	Q9BR76	18			0.000197667	0.000274898	0.000124625	0.000222259	0.000163084	0.000372402	8.03873e-05	0.000151159	0.000335377	0	0.000103636	0.000154801	0.000223015	0.000123071	0	0	0	0.000156421	0.00016737	0.000175266	0.000168657	4.63278e-05	0.000152603	8.45124e-05	0	0.000391273	0.000137017	0	5.62355e-05	2.80198e-05	0.000103307	0.000275376	0.000172981	0.000440696	0.000243487
Coronin-1C	CORO1C	Q9ULV4	12			0	0	0	1.73867e-05	0	9.45451e-05	0	2.41272e-05	0	0	2.46862e-05	0	0	0.000113174	0	0	0	9.82453e-06	3.07788e-05	0	1.91545e-05	0	7.44118e-05	1.96802e-05	0	1.92173e-05	0	0	2.03321e-05	9.0484e-05	2.58922e-05	0	6.98758e-05	9.34605e-05	0
Coactosin-like protein	COTL1	Q14019	7			0	0.000151265	0	0	4.191e-05	0	0	2.83322e-05	0	0	0.000112013	0	0	2.39529e-05	0	0	0	4.43617e-05	0.000102337	0	0.000103341	0.00012569	0.000174073	4.00692e-05	0	0.000201288	0	0	7.26371e-05	0	0.000180809	0	3.28941e-05	0.000243809	0.000125974
Cytochrome c oxidase copper chaperone	COX17	Q14061	2			0	0	0	0	0	3.4007e-05	0	0	0	0	0.000114206	0	0	0	0	0	0	0	4.32094e-05	0	4.80165e-05	4.46174e-05	0.000143434	7.42511e-05	0	0.000150848	0	3.30091e-05	5.6685e-05	2.72751e-05	6.19199e-05	0	0	0	3.04114e-05
Cytochrome c oxidase subunit 4 isoform 1, mitochondrial	COX4I1	P13073	17			0.000470247	0.000680878	0.000899451	0.0016354	0.000722068	0.001674	0.000773245	0.00146253	0.000611987	0.00038398	0.00132966	0.00113406	0.00148828	0.00157951	0.00164438	0.000992342	0.00154989	0.00146939	0.000626004	0.00193246	0.00171999	7.48724e-05	0.00147695	0.000684397	0.000840513	0.00398056	0.00132614	0.000331935	0.00246173	0.00117747	0.00186047	0.000901265	0.000733675	0.00129608	0.00100473
Cytochrome c oxidase subunit 5A, mitochondrial	COX5A	P20674	7			0.00220713	0.00139931	0.00190734	0.00180699	0.00218617	0.00304506	0.00103291	0.00242357	0.0035396	0	0.000359845	0.00195668	0.00224287	0.0023083	0.00274467	0.00219991	0.0013418	0.0011106	6.58839e-05	0.000302876	0.000318883	2.49594e-05	0.000278965	0.00055073	0.000480936	5.72104e-05	0.00127224	0	0.000673581	0.00237291	2.28108e-05	0.00252578	0.00345708	0.000113955	9.20625e-05
Cytochrome c oxidase subunit 5B, mitochondrial	COX5B	P10606	10			0.00110016	0.000336673	0.000272633	0.000934169	0.000806464	0.00300686	0.00130366	0.00297433	0.000908021	5.83645e-05	0.00236894	0.000573277	0.00275237	0.00135784	0.000233134	0.000679871	0	0.00135084	0.000934373	0	0.00173573	0.000639266	0.00284011	0.000844618	0.000649502	0.00295279	0.00031223	0.00082745	0.00439017	0.00193714	0.00208838	0.00269166	0.00205003	0.00113598	0.00144169
Cytochrome c oxidase subunit 6B1	COX6B1	P14854	5			0	2.13398e-05	0	3.43252e-05	4.48593e-05	0.000200168	4.55643e-05	0.000191759	0	0	0.00011944	0	5.71901e-05	0.000143982	0	0	0	5.05487e-05	0.000141616	0	7.70134e-05	0	0.000150393	3.3338e-05	0	0.00015426	0	0	0.000207816	9.15586e-05	0.000115028	9.71357e-05	0.000221675	0	4.86006e-05
Cytochrome c oxidase subunit 6C	COX6C	P09669	8			0	0.000159887	0	9.78573e-05	0.000104032	0.000474583	7.28677e-05	0.0003031	0	0	0.000344539	0	0	0.000104223	0	0	0.00012933	0.000314623	0.000389863	0	3.44809e-05	0	0.000857491	0.0003131	0	9.33498e-05	0.000180012	0.000161221	0.000518592	0.000219587	4.2354e-05	0	0.000488282	1.70612e-05	0.000565819
Cytochrome c oxidase subunit 7A2, mitochondrial	COX7A2	P14406	2			0	1.31646e-05	0	0	0	0	0	4.65907e-05	0	0	7.47665e-05	0	2.52706e-05	3.53274e-05	0	0	0	4.13786e-05	0	0	8.2613e-05	0	9.02854e-05	0.00013237	0	0	0	0	0.000169535	2.94836e-05	0	0	3.22253e-05	3.54409e-05	0
Cytochrome c oxidase subunit 7A-related protein, mitochondrial	COX7A2L	O14548	1			0	0	0	0	0	0	0	0	0	0	0	0	0	0	0	0	0	0	0	0	0	0	0	0	0	0	0	0	0	0	0	0	0	0	0
Cytochrome c oxidase subunit 7C, mitochondrial	COX7C	P15954	2			0	0	0	0	0	0	0	0	0	0	7.43175e-05	0	0	0	0	0	0	0	0.000161865	0	0.000162029	0	5.90091e-05	8.18092e-05	0	0.00021054	0	0.000100098	0.000186826	0	0.000157152	0	0	7.64266e-05	9.31669e-05
Ceruloplasmin	CP	P00450	21			0	3.91556e-05	0	0	0	0	8.42696e-05	0	0	0	7.81466e-05	0	0	0	0	0	0	0	4.46372e-05	0	0.000614484	0.000209911	0.000125949	0.000894152	0	0	0	0	0	9.01979e-06	3.16463e-05	0	0	0.000272694	0.000406547
Copine-3	CPNE3	O75131	2			0	0	0	0	0	2.71637e-05	0	0	0	0	0	0	0	0	0	0	0	0	0	0	0	0	1.33983e-05	0	0	5.30444e-05	0	0	3.05817e-05	0	1.42984e-05	0	0	9.69051e-06	1.94683e-05
Serine/threonine-protein phosphatase CPPED1	CPPED1	Q9BRF8	2			0	7.63004e-05	4.89461e-05	2.22063e-05	0.000130517	1.87929e-05	5.22675e-05	0	0.000116432	0	9.21059e-06	7.66801e-05	0	3.04526e-05	0	2.81433e-05	5.60346e-05	3.95935e-05	0	4.40627e-05	1.60655e-05	5.18364e-05	0	7.99471e-06	5.66445e-05	0	0	0	0	0	0	2.02031e-05	0	4.56066e-05	0
Cleavage and polyadenylation specificity factor subunit 6	CPSF6	Q16630	6			0	0	0	0	0	1.05334e-05	0	7.5784e-05	0	0	1.75823e-05	0	0	0	0	0	0	6.76064e-06	1.23033e-05	0	2.77862e-05	0	2.49772e-05	2.39315e-05	0	9.41152e-06	0	0	0	6.85652e-06	0	0	6.30075e-05	1.88801e-06	6.17172e-06
Cleavage and polyadenylation specificity factor subunit 7	CPSF7	Q8N684	2			0	0	0	0	0	0	0	6.71025e-06	0	0	0	0	0	0	0	0	0	0	0	0	0	0	0	0	0	0	0	0	0	0	0	2.3173e-05	0	0	0
Carnitine O-palmitoyltransferase 1, liver isoform	CPT1A	P50416	6			8.07586e-05	4.65251e-05	0	0.000123852	8.04789e-05	4.35163e-05	0	0	5.90021e-05	0	4.6606e-05	0	0	0.000156821	0	0.000279874	0	0	2.11392e-05	0.000538934	2.39709e-05	0	0	0	0	0.00013951	0.000232259	0	5.04289e-05	5.95586e-05	5.30178e-05	0	3.7193e-05	6.78572e-05	6.13691e-05
Carnitine O-palmitoyltransferase 2, mitochondrial	CPT2	P23786	11			0	0	0	0	0	5.82205e-05	0	0	0	0	1.62476e-05	0	0	2.3582e-05	0	0	0	0	0	0	0	0	6.87115e-05	2.5871e-05	0	1.50217e-05	0	0	4.95058e-05	2.19613e-05	0	0	0	1.34108e-05	6.504e-06
Carnitine O-acetyltransferase	CRAT	P43155	3			0	9.89237e-06	0	0	0	0	0	0	0	0	2.44038e-05	0	0	0	0	0	0	0	0	0	0	0	0	0	0	0	0	0	0	2.33052e-05	0	0	0	0	0
Cysteine-rich protein 1	CRIP1	P50238	5			0	0	0	0	0	0.000341833	0	0	0	0	0	0	0	2.96825e-05	0	0	0	0	0.000291833	0	1.31933e-05	5.71018e-05	3.2766e-05	0.000114427	0	3.37764e-05	0	0	0	9.22209e-05	0	9.96024e-05	0	1.13881e-05	0
Cysteine-rich protein 2	CRIP2	P52943	4			0	0	0	0	0	4.40688e-06	0	0	0	0	2.0617e-05	0	0	0	0	0	0	0	0	0	1.13054e-05	0.000101635	0	0	0	0	0	0	8.64642e-06	0	0	0	0	0	0
Adapter molecule crk	CRK	P46108	4			0	1.95674e-05	0	0	0	0	0	3.21146e-05	0	0	0	0	0	0	0	0	0	1.68038e-05	0	0	0	0	0	0	0	0	0	0	0	0	0	0	0	1.15572e-05	0
Crk-like protein	CRKL	P46109	1			0	0	0	0	0	0	0	0	0	0	0	0	0	0	0	0	0	0	0	0	0	8.20495e-06	0	0	0	0	0	0	0	8.48815e-06	0	0	0	0	0
Rootletin	CROCC	Q5TZA2	1			0.000660157	0.000360409	0.000677132	0.000439403	0	0.000233645	0.000383775	0.0004089	0.000463308	0	8.97706e-05	0	0.000451834	0.000308344	0.000327137	0.000602652	0.000270696	0.000353655	0.000193444	0.000712367	0.000172577	9.08824e-05	0.000131835	5.86847e-05	0.000802756	0.000171109	0.000603347	0	9.92567e-05	0.000404694	0.000151047	0.000518141	0.000280617	0.000155374	0.00020345
Lambda-crystallin homolog	CRYL1	Q9Y2S2	2			0	0	0	0	0	0	0	0	0	0	0	0	0	0	0	0	0	0	0	0	0	0	0	0	0	0	0	0	0	0	0	0	0	0	0
Ketimine reductase mu-crystallin	CRYM	Q14894	1			0	0	0	0	0	3.59149e-06	0	0	0	0	0	0	0	0	0	0	0	0	0	0	0	0	0	0	0	0	0	0	0	0	0	0	9.10924e-06	0	0
Quinone oxidoreductase	CRYZ	Q08257	3			0	0	0	0	0	0	0	0	0	0	5.54315e-06	0	0	0	0	0	0	0	0	0	0	0	4.11034e-05	5.54921e-05	0	0	0	0	0	1.00854e-05	0	0	0	0	0
Citrate synthase, mitochondrial	CS	O75390	10			0	0	0	0	2.35767e-05	0.000101467	0	5.57627e-05	0	0	0.000108963	0	3.62945e-05	0	0	0	0	4.9895e-05	7.01457e-05	0	4.57405e-05	0	0.000133081	0.000138151	0	0.000301303	0	0	0.000137421	0.000217397	0	0	0	9.34238e-05	4.47752e-05
Cold shock domain-containing protein E1	CSDE1	O75534	3			0	2.27184e-05	0	0	0	0	0	4.02471e-05	0	0	0	0	0	0	0	0	0	0	0	0	0	0	0	0	0	0	0	0	0	0	0	0	3.04493e-05	0	0
Casein kinase II subunit alpha 3;Casein kinase II subunit alpha	CSNK2A3;CSNK2A1	Q8NEV1;P68400	1			0	0	0	0	0	2.63713e-06	0	0	0	0	0	0	0	0	0	0	0	0	0	0	0	0	0	0	0	0	0	0	0	0	0	0	0	0	0
Cysteine and glycine-rich protein 1	CSRP1	P21291	11			0.000130431	6.56779e-05	0	0	0	0.000251421	0	0.000133405	7.85558e-05	0	0.000610218	0	0.000107589	5.68505e-05	0	0	0	0	0.000226831	0	0.000334799	0.00218824	0.000450911	0.000305055	0	0.000182264	0	0	0.000262872	0.000120031	0.00021408	0.000114079	0	0.000248829	8.62806e-05
Cystatin-C	CST3	P01034	4			0	0.000179315	0	4.77894e-05	0.000159225	0.000106384	5.86979e-05	0.000161773	0	0	1.54616e-05	0	5.80121e-05	0.000106212	0	3.36481e-05	0	7.60582e-05	0	0	9.12094e-05	0	0	1.60943e-05	0	0	0	0	0	0.000192928	0	0.00010791	0	1.83098e-05	0
Cystatin-A;Cystatin-A, N-terminally processed	CSTA	P01040	6			0	0	0	0	0	0	0	0	0	0	0	0	0	0	0	0	0	0	0	0	7.02384e-05	0.00134389	0	0	0	0	0	0	1.29792e-05	0	1.49765e-05	0	0	0	0
Cystatin-B	CSTB	P04080	5			0	8.27854e-05	0	0	0	3.26993e-05	0	1.73379e-05	0	0	0.000194103	0	0	0	0	0	0	0	0.000155823	0	0.000194317	0.000129975	9.22128e-05	6.04821e-05	0	2.81377e-05	0	0	6.55248e-05	3.98148e-05	0	0	3.14287e-05	6.21547e-05	4.27385e-05
Cleavage stimulation factor subunit 2	CSTF2	P33240	3			5.88424e-05	0	0	2.83471e-05	4.05667e-05	0	2.96527e-05	5.48077e-05	0	0	0	0	2.99669e-05	1.83777e-05	0	1.83313e-05	3.75088e-05	0	0	0	0	0	0	0	0	0	0	0	0	4.46866e-05	0	2.36785e-05	4.99703e-05	0	0
cTAGE family member 5;Melanoma inhibitory activity protein 2;cTAGE family member 2	CTAGE5;MIA2;CTAGE1	O15320;Q96PC5;Q96RT6	2			0	0	0	1.64854e-05	0	0	0	0	0	0	0	0	0	0	0	0	0	0	0	0	0	0	0	0	0	1.52261e-05	0	0	0	0	0	0	0	0	0
Catenin alpha-1	CTNNA1	P35221	55			0.000774333	0.000502237	0.000651668	0.00119513	0.000952385	0.00182192	0.000647336	0.00145502	0.000848428	0	0.000746394	0.000432576	0.000837593	0.00107776	0	0.0019096	0.000532386	0.0012912	0.000387885	0.000517419	0.000758308	1.96131e-05	0.00127471	0.000653231	0.000272386	0.00266382	0.00107393	0	0.00112725	0.00157958	0.000695808	0.000456002	0.00199382	0.000994308	0.000578174
Catenin alpha-2	CTNNA2	P26232	12			0	0	0	0	0	0	0	0	0	0	0	0	0	0	0	0	0	0	0	0	0	0	0	0	0	0	0	0	0	0	0	0	0	0	0
Catenin beta-1	CTNNB1	P35222	19			9.61663e-05	2.06264e-05	7.38617e-05	8.14668e-05	0.00011079	0.000667051	0.000281068	0.00029187	0	0	0.000164697	0	0.00018938	0.000628382	0	0.000272339	4.98026e-05	0.000303173	0.000123397	0	0.000104955	0	0.000254033	0.000152353	0	0.000350327	5.46345e-05	0	0.000171628	0.000513611	7.58744e-05	0.00013326	0.000526739	0.000192476	0.000116839
Catenin delta-1	CTNND1	O60716	33			3.35449e-05	0.000211757	0.000468658	0.000343037	0.000108259	0.000756314	0.000124456	0.000274472	5.61116e-05	0	0.00022333	0.000232052	7.31541e-05	0.000223258	0	0.000241381	0.000118274	0.00020759	0.000202791	0	7.88162e-05	0	0.000621666	0.00025853	0	0.000993991	0.00043271	0	0.000535012	0.000186472	0.000182691	0.000154193	0.000491684	0.000374315	0.000341837
Lysosomal protective protein;Lysosomal protective protein 32 kDa chain;Lysosomal protective protein 20 kDa chain	CTSA	P10619	2			0	0	0	0	0	0	0	0	0	0	5.0421e-06	0	0	0	0	0	0	0	0	0	0	0	0	1.59489e-05	0	3.28459e-05	0	0	0	0	0	0	0	4.68458e-06	0
Cathepsin B;Cathepsin B light chain;Cathepsin B heavy chain	CTSB	P07858	6			0	0	0	0	0	0	0	0	0	0	0.000116174	0	0	0	0	0	0	0	0.000147523	0	7.27658e-05	0	0.00014607	8.46052e-05	0	0.000204042	0	0	9.79528e-05	4.50204e-05	0	0	0	4.74832e-05	6.38966e-05
Dipeptidyl peptidase 1;Dipeptidyl peptidase 1 exclusion domain chain;Dipeptidyl peptidase 1 heavy chain;Dipeptidyl peptidase 1 light chain	CTSC	P53634	2			0	0	0	0	0	0	0	0	0	0	0	0	0	0	0	0	0	0	0	0	0	0	0	0	0	0	0	0	0	0	0	0	0	0	0
Cathepsin D;Cathepsin D light chain;Cathepsin D heavy chain	CTSD	P07339	15			0	0.000103642	0	7.87363e-05	0	0.000263454	0	7.95204e-05	0	0	0.000254637	0	0	8.14543e-05	0	0	0	0.000134397	0.000147288	0	0.000232133	7.45706e-05	0.000415309	0.000364181	0	0.000500789	0	0	6.75699e-05	0.00015694	3.80824e-05	9.92969e-05	0.000237004	0.000215307	9.59788e-05
Cathepsin G	CTSG	P08311	9			0	0	0	0	0	0	0	0	0	0	0	0	0	0	0	0	0	8.11168e-05	0	0	0	0	0	0	0	0	0	0	0	0	0	0	0	0	0
Cathepsin L1;Cathepsin L1 heavy chain;Cathepsin L1 light chain	CTSL	P07711	1			0	0	0	0	0	0	0	0	0	0	0	0	0	0	0	0	0	0	0	0	0	0	0	0	0	0	0	0	0	0	0	0	0	0	0
Cathepsin S	CTSS	P25774	8			0	1.89213e-05	0	0.000106192	0	0.000101178	5.50255e-05	2.97245e-05	0	0	0.000238183	0	7.46139e-05	0	0	0	7.44123e-05	3.22492e-05	9.46629e-05	0	0.000151713	1.3324e-05	0.0001561	0.000299767	0	0.000297041	2.89166e-05	0	0.000484637	0	0	0	0	2.06439e-05	1.83615e-06
Cathepsin Z	CTSZ	Q9UBR2	7			0.000233905	0.000399122	6.7647e-05	0.000354626	0.000589418	0.000186962	0.000703495	0.000340371	0.000477	0	0.0001422	0.000207894	0.000551778	0.000220807	0	5.62689e-05	0.00107112	0.000308929	0.000173491	0.000153706	0	0	0.000234483	4.46823e-05	5.9114e-05	0.000244002	0.000919205	0	5.16047e-05	0.000241298	8.63383e-05	0.000574843	0.000193508	0	9.55505e-05
Src substrate cortactin	CTTN	Q14247	25			0.00074649	0.000197886	0.000748604	3.41674e-05	0	0.000327789	0	0.000375303	0.000875103	0	9.31781e-05	0.000655893	0	1.86191e-05	0	0	0	0.000104191	0.000808217	0	0.000225561	5.01302e-05	9.47047e-05	0.000104006	0	0.000442282	0	0	0.000195482	0.00024059	0.000324656	0	0.000382093	0.000384696	0.000104957
Spliceosome-associated protein CWC15 homolog	CWC15	Q9P013	2			0	0	0	0	0	0	0	2.19333e-05	0	0	0	0	0	0	0	0	0	0	0	0	0	0	0	0	0	0	0	0	0	1.6775e-05	0	0	0	0	0
Cytochrome b5	CYB5A	P00167	7			0	0	0	0	0	4.58682e-05	0	0	0	0	0	0	0	1.56248e-05	0	0	0	0	9.36631e-06	0	2.33659e-05	0	7.10457e-05	0	0	6.4208e-05	0	0	6.7594e-05	3.455e-05	0	0	2.02034e-05	2.06985e-05	2.47935e-05
Cytochrome b5 type B	CYB5B	O43169	3			0	0	0	0	0	3.48524e-06	0	0	0	0	5.86017e-05	0	0	0	0	0	0	0	0	0	4.1043e-05	0	0	0	0	2.43243e-05	0	0	5.82007e-05	0	2.58149e-05	0	0	3.82753e-05	0
NADH-cytochrome b5 reductase 3;NADH-cytochrome b5 reductase 3 membrane-bound form;NADH-cytochrome b5 reductase 3 soluble form	CYB5R3	P00387	3			0	0	0	0	0	0	0	0	0	0	4.69665e-06	0	0	0	0	0	0	0	0	0	3.50682e-06	0	0	1.49101e-06	0	0	0	0	0	0	0	0	0	0	0
Cytochrome c1, heme protein, mitochondrial	CYC1	P08574	5			0	2.07594e-05	0	0	0	0	0	4.79517e-05	0	0	2.57894e-05	0	0	5.55228e-05	0	0	0	0.000167028	0	0	3.53244e-05	0	7.01646e-06	0	0	4.37038e-05	0	0	1.68994e-05	8.35325e-06	0	0	3.11635e-05	0	0
Cytochrome c	CYCS	P99999	19			0	0.000535042	0	0.000548623	0	0.000617585	0.000347771	0.000221901	0	0	0.000273924	0	0.000200372	0.00066958	0	0.000143026	0	0.000352906	0.000653743	0	0.000234567	0.000103375	0.00248223	3.41087e-05	0	0.0019442	0.000203889	0.000578663	0.000418176	0.000171887	0.000352137	0.000327087	0.000289692	0.000776606	0.00102706
Cytoplasmic FMR1-interacting protein 1;Cytoplasmic FMR1-interacting protein 2	CYFIP1;CYFIP2	Q7L576;Q96F07	2			0	1.89974e-05	4.33159e-05	2.4147e-05	0	1.72912e-05	0	0	0	0	0	0	2.45811e-05	1.47143e-05	0	4.38202e-05	0	0	0	0	0	0	0	0	0	0	0	0	0	0	0	0	0	0	0
Dystroglycan;Alpha-dystroglycan;Beta-dystroglycan	DAG1	Q14118	3			0	0	0	0	0	0	0	0	0	0	0	0	0	0	0	0	0	0	0	0	0	0	0	0	0	0	0	0	0	0	0	0	0	0	0
Death-associated protein 1	DAP	P51397	3			0	0	0	0	0	0	0	0	0	0	0	0	0	0	0	0	0	0	0	0	1.42265e-05	0	0	0	0	0	0	0	0	0	0	0	0	0	0
28S ribosomal protein S29, mitochondrial	DAP3	P51398	2			0	0	0	0	0	0	0	0	0	0	0	0	0	0	0	0	0	0	0	0	0	0	3.61562e-06	0	0	0	0	0	0	0	0	0	0	0	0
Aspartate--tRNA ligase, cytoplasmic	DARS	P14868	3			0	0	0	0	0	0	0	0	0	0	0	0	0	0	0	0	0	0	0	0	0	0	0	0	0	0	0	0	0	0	0	0	0	2.94307e-06	0
Acyl-CoA-binding protein	DBI	P07108	9			0	8.9635e-05	0	7.53203e-05	7.60593e-05	5.87988e-05	4.19779e-05	8.35157e-05	0	0	0.000334458	0.000117678	0	3.01272e-05	0.000241895	1.28674e-05	4.3986e-05	3.54821e-05	8.78036e-05	0	0.000247711	6.95358e-05	0.000196823	0.000189682	0	0.000188072	0	0.000448437	8.84053e-05	5.2696e-05	7.66443e-05	7.56498e-05	0.000148364	0.00031845	0.000168889
Drebrin-like protein	DBNL	Q9UJU6	14			0.000181047	0.000160665	0.000124926	5.83724e-05	0.000102209	0.000130185	0.000194181	0.000155876	0.000285266	0	1.46568e-05	0.000104561	4.64321e-05	3.40886e-05	0	9.67876e-05	9.23746e-05	0.000153278	0.000191074	0	6.3289e-05	4.87342e-05	2.43824e-05	1.91103e-05	0	4.23739e-05	0.000122626	0	1.30723e-05	0.000179192	3.77235e-05	0.000200607	0.000113774	3.26568e-05	5.82811e-05
Lipoamide acyltransferase component of branched-chain alpha-keto acid dehydrogenase complex, mitochondrial	DBT	P11182	4			0	0	0	0	0	3.74725e-06	0	0	0	0	4.9139e-06	0	0	0	0	0	0	0	0	0	0	0	0	5.50674e-07	0	0	0	0	0	0	0	0	0	0	0
Dermcidin;Survival-promoting peptide;DCD-1	DCD	P81605	3			0	0	0	0	0	0	0	0	0	0	5.103e-05	7.62453e-05	0	0	0	0	0	0	4.6852e-05	0	0.000127218	0.00113793	0	3.11327e-05	0	0	0	0.000106391	4.77635e-05	0	0.000144104	0	0	0	0
Decorin	DCN	P07585	21			0	0	0	0	0	0	0	0	0	0.00570399	2.75204e-06	0	0	0	0.00231059	0	0	0	0	0	0	0.000142149	4.41467e-06	2.96194e-05	0	0	0	0	0	0	3.12353e-05	0	0	4.76576e-05	2.13669e-05
m7GpppX diphosphatase	DCPS	Q96C86	3			0	3.30299e-05	0	0	8.34875e-05	0	5.25123e-05	2.9926e-05	0	0	0	0	0	0	0	0	0	0	0	0	9.24064e-06	0	1.36433e-05	0	0	0	0	0	0	0	0	0	0	0	0
Dynactin subunit 1	DCTN1	Q14203	12			0	0	0	2.35128e-05	0	3.06635e-05	0	0	0	0	8.1475e-07	0	2.11458e-05	0	0	2.8646e-05	0	9.02577e-06	0	0	5.73664e-06	0	0	0	0	0	0	0	0	2.69272e-05	0	0	2.04253e-05	2.60838e-05	0
Dynactin subunit 2	DCTN2	Q13561	19			0	1.69264e-05	0	4.80944e-05	0	0.000268849	0	0.000204794	0	0	4.35957e-05	0.000132352	4.59111e-05	4.8676e-05	0	0	0	7.22341e-05	9.2446e-05	0	4.27028e-05	0	3.42556e-05	1.81812e-05	0	0	0	0	3.72649e-05	0.000123958	1.42921e-05	2.77204e-05	0.00027394	3.1332e-05	3.82098e-05
Dynactin subunit 6	DCTN6	O00399	1			0	0	0	0	0	0	0	0	0	0	0	0	0	0	0	0	0	0	0	0	0	0	0	0	0	0	0	0	0	0	0	0	1.14873e-05	0	0
dCTP pyrophosphatase 1	DCTPP1	Q9H773	3			0	2.05901e-05	0	0	0	0	0	1.40398e-05	0	0	0	0	0	0	0	0	0	1.45138e-05	0	0	0	0	0	0	0	0	2.16363e-05	0	0	0	0	0	0	0	0
L-xylulose reductase	DCXR	Q7Z4W1	5			0	0	0	0	0	7.58967e-06	0	0	0	0	2.16797e-06	0	0	1.13985e-05	0	0	0	0	0	0	2.55632e-06	0	2.95038e-06	5.66173e-07	0	7.55657e-06	0	0	0	0	0	0	0	1.99733e-06	2.23262e-05
N(G),N(G)-dimethylarginine dimethylaminohydrolase 1	DDAH1	O94760	17			0.00160933	0.0010705	0.000692066	0.000682549	0.00136206	0.000531041	4.71677e-05	0.00107177	0.00186842	0	0.000155435	0.00127743	0.000278454	0.000348241	0	0.000357138	0.000460375	0.00038332	0.000219885	0.000466763	0.000260533	0.000137864	0.000150104	0.000134573	0.000321434	7.76565e-05	0.000711642	0	3.97484e-05	0.000139043	0.00011314	0.000695348	0.000993214	0.000153279	5.82764e-05
N(G),N(G)-dimethylarginine dimethylaminohydrolase 2	DDAH2	O95865	9			3.04412e-05	0.000111652	0	5.83234e-05	0.000179763	2.63778e-05	0	2.10858e-05	5.85929e-05	0	0	0	4.80043e-05	3.27414e-05	0	0	0	5.17654e-05	0	0	6.56188e-05	1.95427e-05	2.20675e-05	7.85351e-06	0	0	0	0	6.34629e-06	0	1.3635e-05	0	3.998e-05	7.48304e-06	5.87613e-06
Aromatic-L-amino-acid decarboxylase	DDC	P20711	2			0	0	0	0	0	0	0	0	0	0	0	0	0	0	0	0	0	0	0	0	0	0	0	0	0	0	0	0	0	0	0	0	1.92853e-05	0	0
D-dopachrome decarboxylase;D-dopachrome decarboxylase-like protein	DDT;DDTL	P30046;A6NHG4	2			0	0	0	0	0	1.23429e-05	0	0	0	0	2.91131e-05	0	0	0	0	0	0	0	0	0	3.99552e-05	0	1.12416e-05	9.67118e-05	0	0	0	0	2.35418e-05	0	0	0	0.000125977	6.34517e-06	0
ATP-dependent RNA helicase DDX1	DDX1	Q92499	9			0	0	0	0	0	0	0	3.65033e-06	0	0	0	0	0	1.58778e-05	0	0	0	1.89157e-05	3.16969e-05	0	5.30787e-05	2.75116e-05	8.9542e-05	3.59315e-05	0	4.6232e-05	0	0	2.21728e-05	0	1.58621e-05	0	0	4.26703e-05	6.0477e-05
Probable ATP-dependent RNA helicase DDX17	DDX17	Q92841	18			0.00016324	0.000217268	0.000118477	0.000108357	0.000162336	9.62549e-05	5.11833e-05	0.000202958	0.00029261	0	0	8.65678e-05	0.000120687	8.48733e-05	0	0	0	0.000232436	2.02436e-05	0	0.000154814	1.18354e-05	1.15073e-05	2.10453e-05	0	5.68244e-05	0.0001078	0	0	0.000169026	0	0.000150253	0.000265234	0.000130831	0
ATP-dependent RNA helicase DDX19A;ATP-dependent RNA helicase DDX19B	DDX19A;DDX19B	Q9NUU7;Q9UMR2	2			0	0	0	0	0	0	0	1.13502e-05	0	0	0	0	0	0	0	0	0	0	0	0	0	0	0	0	0	0	0	0	0	0	0	0	0	0	0
Spliceosome RNA helicase DDX39B	DDX39B	Q13838	9			0	4.22703e-05	0	0	2.71722e-05	4.75408e-05	2.91106e-05	2.96974e-05	0	0	2.40301e-05	0	0	2.10936e-05	0	0	0	1.0095e-05	0	0	5.46959e-05	1.63554e-05	0.000136915	3.37656e-05	0	0	0	0	1.45707e-05	9.03835e-05	0	0	1.3145e-05	2.37739e-05	2.41729e-05
ATP-dependent RNA helicase DDX3Y;ATP-dependent RNA helicase DDX3X	DDX3Y;DDX3X	O15523;O00571	7			0	0	0	0	0	0	0	1.75654e-05	0	0	1.321e-05	0	0	0	0	0	0	2.27721e-05	0	0	1.88267e-05	0	1.94097e-05	8.25715e-06	0	1.00798e-05	0	0	1.3915e-05	0	0	0	2.69428e-05	1.88906e-05	0
Probable ATP-dependent RNA helicase DDX5	DDX5	P17844	11			0	2.45012e-05	6.59099e-05	3.91271e-05	0	0	0	3.26072e-05	0	0	0	0	0	0	0	0	0	0	0	0	0	0	3.5156e-06	0	0	0	0	0	0	1.06805e-05	0	0	0.000102325	0	0
2,4-dienoyl-CoA reductase, mitochondrial	DECR1	Q16698	19			0	6.53756e-05	0.000207665	0.000144106	2.97144e-05	0.000443028	0.000117156	0.00022904	0.000137138	0	0.000431646	0.000155731	0	0.000151395	0	0.000350477	0.000170029	0.000687066	0.000227927	0	0.000176273	1.76273e-05	0.000484992	0.000356474	0	0.000762151	5.291e-05	0	0.00065796	0.000191614	0.000229821	2.69306e-05	0.00027918	0.000165629	0.000243003
Protein DEK	DEK	P35659	4			0	0	0	0	0	1.08554e-05	0	9.73989e-05	0	0	0	0	0	3.04917e-05	0	3.34807e-05	0	0	0	0	2.07629e-05	1.14283e-05	5.29811e-06	0	0	0	0	0	0	1.42882e-05	0	0	0	0	0
Density-regulated protein	DENR	O43583	4			0	0	0	0	0	0	0	1.9562e-05	0	0	2.16647e-05	0	0	1.47106e-05	0	0	0	0	6.73246e-05	0	0	0	7.86521e-06	0	0	1.16121e-05	0	0	0	2.70895e-05	1.70394e-05	0	0	0	0
Desmin	DES	P17661	55			0	9.81913e-05	0	0	0	0	0.000123881	0	0	0.0594098	7.81353e-05	0	0	0	0.000462204	0	0	5.2214e-05	0	0	3.10954e-05	0.000287119	0	1.23423e-05	0	0	0	0	0	0	0	0	0	1.3113e-05	0
Dehydrogenase/reductase SDR family member 11	DHRS11	Q6UWP2	8			0	1.32679e-05	0	3.69585e-05	0	1.9603e-05	0	5.35761e-05	0	0	2.87224e-05	0	0	6.19661e-05	0	0	0	0	7.53364e-05	0	5.31895e-05	0	3.64907e-05	1.25985e-05	0	5.71814e-05	3.56886e-05	0	0	0	5.81004e-05	0	0	3.37826e-05	5.37842e-05
Dehydrogenase/reductase SDR family member 4	DHRS4	Q9BTZ2	4			3.0522e-05	0	6.97154e-05	0.000149695	9.90008e-05	3.42074e-05	0.000112314	0.00010964	0	0	2.03328e-05	0	0.000101233	3.88918e-05	0	7.07757e-05	0	5.50348e-05	0	0	1.17488e-05	0	0	0	0	3.63046e-06	4.46571e-05	0	1.06646e-05	3.69479e-05	0	7.99811e-05	0.000104176	0	9.18996e-06
Dehydrogenase/reductase SDR family member 7	DHRS7	Q9Y394	2			0	0	0	0	0	0	0	0	0	0	6.74244e-06	0	0	0	0	0	0	0	0	0	4.53315e-06	0	1.65888e-06	0	0	6.42504e-05	0	0	8.18056e-06	0	0	0	0	3.04352e-06	0
Dehydrogenase/reductase SDR family member 9	DHRS9	Q9BPW9	1			2.22564e-05	0	0	0	0	0	0	0	0	0	0	0	0	0	0	0	0	0	0	0	0	0	0	0	0	0	0	0	0	0	0	0	1.58897e-05	0	0
Pre-mRNA-splicing factor ATP-dependent RNA helicase DHX15	DHX15	O43143	3			0	0	0	0	0	0	0	0	0	0	6.05229e-06	0	0	1.95956e-05	0	0	0	0	0	0	0	0	0	1.35054e-05	0	0	0	0	0	0	0	0	0	0	0
ATP-dependent RNA helicase A	DHX9	Q08211	8			0	4.84927e-05	0	5.84779e-05	7.41653e-05	4.87683e-05	0	0	0	0	1.35734e-05	0	5.92968e-05	5.44489e-05	0	0	0	8.67781e-05	0	0	0	0	0	7.96068e-06	0	1.74668e-05	5.71577e-05	0	0	8.07042e-05	0	0	0.000142849	0	2.68892e-05
Diablo homolog, mitochondrial	DIABLO	Q9NR28	4			0	0	0	0	0	7.03782e-05	0	3.60942e-05	0	0	0	0	2.53492e-05	0	0	4.17656e-05	0	1.12986e-05	0	0	0	0	0	9.59382e-06	0	1.31988e-05	0	0	0	0.000128728	0	0	0	0	0
H/ACA ribonucleoprotein complex subunit 4	DKC1	O60832	2			0	0	0	0	0	0	0	1.75049e-05	0	0	1.43123e-05	0	1.88181e-05	6.30096e-06	0	0	0	0	0	0	0	0	0	0	0	2.88741e-05	0	0	0	5.38312e-06	0	0	0	0	0
Dihydrolipoyllysine-residue acetyltransferase component of pyruvate dehydrogenase complex, mitochondrial	DLAT	P10515	10			0	0	0.000178934	0.000145858	0	0.000120168	8.05073e-05	0	0	0	3.08742e-05	0.000183743	4.29096e-05	0.00010537	0	0.000253609	0.000158805	0	0	0	2.84651e-05	0	1.93595e-05	3.21594e-05	0	0.00014126	0.000165075	0	9.88072e-05	4.03573e-05	0	6.99661e-05	0	2.23745e-06	5.13405e-05
Dihydrolipoyl dehydrogenase, mitochondrial	DLD	P09622	27			0.000309274	0.000489402	0.000445963	0.00150332	0.00092101	0.00155354	0.000695151	0.00113283	0.00100467	0.000271638	0.000600918	0.000738255	0.000877121	0.000582325	0	0.00204734	0.00116393	0.00145534	0.000577839	0.000390577	0.000457388	4.32256e-05	0.000625493	0.00048204	0.000284745	0.00106653	0.00151263	9.45781e-05	0.00122693	0.000867589	0.000388359	0.000525824	0.00135094	0.000484883	0.000660524
Disks large homolog 1;Disks large homolog 2	DLG1;DLG2	Q12959;Q15700	4			0	1.54385e-05	0	3.37949e-05	6.44134e-05	0	2.75707e-05	0	0	0	0	0	2.96138e-05	0	0	5.53142e-05	3.55162e-05	0	0	0	0	0	0	0	0	0	0	0	0	3.03842e-05	0	2.92962e-05	0	0	0
Disks large homolog 3	DLG3	Q92796	2			0	0	0	0	0	0	0	0	0	0	0	0	0	0	0	0	0	0	0	0	0	0	0	0	0	0	0	0	0	0	0	0	0	0	0
Dihydrolipoyllysine-residue succinyltransferase component of 2-oxoglutarate dehydrogenase complex, mitochondrial	DLST	P36957	17			0.00021692	0.000187365	0.000168277	0.000608845	0.000131239	0.00029805	0.000360881	0.000358656	0.000259326	0.000129716	0.000169658	0	0.00061628	0.000128002	0.000877299	0.000831955	0.000846929	0.000167975	0.000137896	0.000605196	0.00010943	0	0.000420293	0.000179309	0.000285154	0.000507706	0.000637736	0.000101878	0.000583437	8.22749e-05	0.000129728	0.000443349	0.00014791	0.000100371	0.000137183
Deleted in malignant brain tumors 1 protein	DMBT1	Q9UGM3	2			0	0	0	0	0	0	0	0	0	0	0	0	0	0	0	0	0	0	0	0	0	0	0	0	0	0	0	0	0	0	0	0.000243619	0	0	0
DnaJ homolog subfamily A member 1	DNAJA1	P31689	2			0	0	0	0	0	0	0	0	0	0	0	0	0	0	0	0	0	0	0	0	0	0	0	0	0	0	0	0	0	0	0	0	0	0	0
DnaJ homolog subfamily A member 2	DNAJA2	O60884	2			0	0	0	0	0	0	0	0	0	0	0	0	0	0	0	0	0	0	0	0	0	0	1.99776e-05	1.15195e-05	0	0	0	0	0	0	0	0	0	1.7811e-05	0
DnaJ homolog subfamily A member 3, mitochondrial	DNAJA3	Q96EY1	2			0	0	0	0	0	0	0	0	0	0	0	0	0	0	0	0	0	1.37415e-05	0	0	0	0	0	0	0	0	0	0	0	8.53312e-06	0	6.63761e-06	0	0	0
DnaJ homolog subfamily B member 1	DNAJB1	P25685	12			0	3.38694e-05	0	0	0	5.26619e-05	0	9.5585e-05	0	0	0	0	0	7.48787e-06	0	0	0	3.1048e-05	9.65917e-06	0	2.33017e-05	0	0	1.76833e-06	0	0	0	0	0	5.1669e-05	0	0	5.53077e-05	2.00689e-05	0
DnaJ homolog subfamily B member 11	DNAJB11	Q9UBS4	8			0	0	0	1.61427e-05	0	0	0	0	0	0	2.63099e-05	0	0	0	0	0	0	0	0	0	1.10137e-05	0	3.11759e-06	6.0409e-06	0	0	2.8775e-05	0	6.8246e-05	0	0	1.12178e-05	2.27327e-05	5.01502e-05	0
DnaJ homolog subfamily C member 3	DNAJC3	Q13217	3			0	0	0	2.88198e-05	0	0	0	0	0	0	0	0	0	0	0	0	0	0	0	0	0	0	0	0	0	0	0	0	0	0	0	0	2.82413e-05	1.68921e-05	0
DnaJ homolog subfamily C member 8	DNAJC8	O75937	7			0	0	0	0	0	0	0	1.19138e-05	0	0	0	0	0	0	0	0	0	0	0	0	0	0	0	2.78102e-05	0	0	0	0	0	1.2407e-05	0	0	2.60892e-05	0	0
Dynamin-2	DNM2	P50570	12			0	7.46782e-05	0	4.95256e-05	0	5.30239e-05	0	7.36475e-05	0	0	3.48333e-05	0	0	1.95617e-05	0	4.79919e-05	0	3.69071e-05	2.07476e-05	0	3.10978e-05	0	0.000159177	2.42905e-05	0	8.6678e-05	0	0	0	4.45539e-05	0	0	0	0.000125223	5.92498e-05
2-deoxynucleoside 5-phosphate N-hydrolase 1	DNPH1	O43598	2			0	1.5002e-05	0	0	0	0	0	2.31503e-05	0	0	0	0	0	0	0	0	0	1.11956e-05	0	0	0	0	0	0	0	0	0	0	0	0	0	0	5.09423e-05	0	0
Dipeptidyl peptidase 3	DPP3	Q9NY33	3			0	0	0	0	0	1.74068e-05	0	1.05779e-05	0	0	0	0	0	0	0	0	0	1.0354e-05	0	0	6.62222e-06	0	0	0	0	4.96839e-06	0	0	0	8.07081e-06	0	0	0	2.04989e-05	0
Dihydropyrimidinase-related protein 2	DPYSL2	Q16555	16			9.52838e-05	0.000371845	0.000112589	0.000142374	0.000138693	0.000134088	0.000213032	9.92254e-05	0.000125439	0.000193341	6.73134e-05	0.000124483	0.000134364	6.11742e-05	0	0.000130464	0.000174835	7.03595e-05	0	0.000180223	8.14401e-05	6.01956e-05	5.10261e-05	0.00019811	0	3.74136e-06	8.72052e-05	0	2.93149e-05	0.000208931	2.27325e-05	0.000182383	0.00012716	8.54424e-05	1.72618e-05
Dihydropyrimidinase-related protein 3	DPYSL3	Q14195	10			0	5.35595e-05	0	0	0	0	0	0	0	0	0	0	0	0	0	0	0	0	0	0	0	0	3.77318e-06	9.66274e-06	0	0	0	0	0	0	0	0	0	4.89997e-06	0
Desmocollin-1	DSC1	Q08554	2			0	0	0	0	0	0	0	4.62723e-05	0	0	0	0	0	0	0	0	0	0	0	0	0	0	0	0	0	0	0	3.98099e-05	0	0	0	4.32642e-05	0	0	0
Desmocollin-2	DSC2	Q02487	7			0	0	0	0	0	0	0	2.2118e-05	0	0	2.5491e-05	0.000114154	0	0	0	0	0	0	5.25308e-05	0	0	0	4.72691e-05	8.87064e-06	0	0.000129335	0	0	0.000108821	2.34443e-05	5.04067e-05	0	0	2.85517e-05	2.6003e-05
Desmoglein-1	DSG1	Q02413	9			0	6.69908e-05	0	0	0	0	0	0.000196727	0	0	0	0	0	0	0	0	0	0	0	0	0	0	0	0	0	0	2.12924e-05	0	0	0	0	0	0	0	0
Desmoglein-2	DSG2	Q14126	31			0.00031823	0.000448788	0.000610607	0.000570015	0.00122039	0.000883545	0.000156358	0.00123678	0.000806934	0	0.000245488	0.0011667	0.000867958	0.00050622	0	0.000674942	0.000464307	0.000564275	0.000625381	0.000311563	0.000411772	8.62584e-05	0.000449011	0.000282636	5.9014e-05	0.00078085	0.00125819	0	0.000384166	0.000606396	0.000280789	0.000689192	0.000720405	0.000379429	0.000167296
Desmoplakin	DSP	P15924	230	Desmosome		0.00387799	0.0033828	0.00286903	0.00437859	0.00492711	0.00661863	0.00181375	0.00629809	0.00424778	3.04624e-05	0.0013243	0.00514957	0.00357928	0.00257254	0.00414355	0.00714106	0.00781961	0.00358953	0.00282716	0.00748957	0.00188549	9.08992e-05	0.00259292	0.00114658	0.0035885	0.00605842	0.00648939	2.46156e-05	0.00472675	0.00304152	0.00134652	0.00308283	0.00306849	0.00218195	0.00151886
Destrin	DSTN	P60981	10	Bacterial adhesion; actin remodelling		3.49879e-05	0.000117769	0	3.79031e-05	4.29388e-05	0.000307124	5.13632e-05	0.000168849	5.40172e-05	0	0.000386813	0	3.58826e-05	0.000212661	0	0	5.5883e-05	0.000121459	0.000131815	0	0.000218234	0.000212582	0.000273624	0.000230705	0	0.000158781	5.1263e-05	0	0.000110478	0.000288986	6.93369e-05	0.000281051	8.27703e-05	0.000303748	9.78679e-05
D-tyrosyl-tRNA(Tyr) deacylase 1	DTD1	Q8TEA8	1			0	0	0	0	0	0	0	7.9798e-06	0	0	0	0	0	0	0	0	0	7.83762e-06	0	0	0	0	0	0	0	0	0	0	0	0	0	0	0	0	0
Thymidylate kinase	DTYMK	P23919	1			0	0	0	0	0	0	0	0	0	0	0	0	0	9.15054e-06	0	0	0	0	0	0	0	0	0	0	0	0	0	0	0	0	0	0	1.35866e-05	0	0
Deoxyuridine 5-triphosphate nucleotidohydrolase, mitochondrial	DUT	P33316	6			0	0	0	0	0	0	0	0	0	0	9.44394e-06	0	0	1.97945e-05	0	0	0	0	2.82479e-05	0	7.14507e-06	0	0	0	0	3.03557e-05	0	0	2.19759e-05	2.80263e-05	1.6181e-05	0	1.54312e-05	0	0
Cytoplasmic dynein 1 heavy chain 1	DYNC1H1	Q14204	25			0	0	0	4.30967e-05	0	8.06487e-05	0	1.43133e-05	0	0	1.7443e-05	0	0	0	0	0	0	0	1.32598e-05	0	0	0	2.37016e-05	0	0	0.000217058	0	0	0	1.35254e-05	0	0	0.000102328	5.51763e-05	2.58496e-06
Cytoplasmic dynein 1 intermediate chain 2	DYNC1I2	Q13409	7			0	9.3584e-05	0	0.000188118	0	4.47798e-05	2.78155e-05	4.29137e-05	0.000274853	0	1.30378e-05	0.000200913	0	7.44752e-05	0	6.37598e-05	3.10771e-05	3.23606e-05	0.000190642	0	5.85184e-05	2.30541e-05	0	0	0	0.000117859	9.44398e-05	0	9.4496e-05	3.75934e-05	5.3785e-05	1.92052e-05	8.957e-05	1.92692e-05	0.000151154
Cytoplasmic dynein 1 light intermediate chain 2	DYNC1LI2	O43237	6			0	0	0	2.33422e-05	0	3.96746e-05	0	4.19201e-05	0	0	0	0	0	0	0	0	0	0	1.64469e-05	0	4.02115e-06	0	1.77783e-05	0	0	3.07574e-05	0	0	0	0	0	0	0	0	1.25277e-06
Dynein light chain 1, cytoplasmic	DYNLL1	P63167	3			0	0	0	0	0	0	0	0	0	0	1.31197e-05	0	0	0	0	0	0	0	0	0	4.74565e-05	0	2.15457e-05	5.07468e-05	0	0	0	0	6.05003e-05	2.46813e-05	0	0	0	2.94092e-05	0
Dynein light chain 2, cytoplasmic	DYNLL2	Q96FJ2	2			0	0	0	0	0	0	0	0	0	0	1.20174e-05	0	0	0	0	0	0	0	0	0	1.16388e-05	0	0	2.78482e-05	0	0	0	0	0	0	0	0	0	0	0
Dynein light chain roadblock-type 1;Dynein light chain roadblock-type 2	DYNLRB1;DYNLRB2	Q9NP97;Q8TF09	6			0.000137222	2.59696e-05	0	0	0.00014958	5.51977e-05	0.000126549	2.10274e-05	0.000188927	0	0	0	0.000123701	3.38587e-05	0	0	0	9.76063e-06	0	0	1.05229e-05	0	0	0	0	0	0.000107337	0	0	1.92799e-05	0	0	9.02789e-05	6.33624e-06	0
3-beta-hydroxysteroid-Delta(8),Delta(7)-isomerase	EBP	Q15125	1			0	0	0	0	0	0	0	0	0	0	0	0	0	0	0	0	0	0	0	0	0	0	0	0	0	0.000155422	0	0	0	0	0	0	0	0	0
Delta(3,5)-Delta(2,4)-dienoyl-CoA isomerase, mitochondrial	ECH1	Q13011	16			0.000246471	0.000394717	0.000716134	0.00123422	0.00111338	0.000660625	0.000833652	0.000761837	0.000631266	9.588e-05	0.000804302	0.00107767	2.17971e-05	0.0006153	0	0.000227478	0.000461837	0.000921729	0.000690921	0	0.000612741	6.89405e-05	0.000746596	0.000678462	0.00045849	0.00165979	0.00106156	3.46331e-05	0.0010693	0.000807442	0.000192223	0.000259677	0.000885483	0.000297384	0.00116008
Ethylmalonyl-CoA decarboxylase	ECHDC1	Q9NTX5	4			0	0	0	0	0	0	0	0	0	0	0	0	0	0	0	0	0	0	0	0	0	0	3.94114e-05	1.48477e-06	0	0	0	0	0	0	0	0	0	2.19198e-05	0
Enoyl-CoA hydratase domain-containing protein 2, mitochondrial	ECHDC2	Q86YB7	2			0	0	0	0	0	0	0	1.37006e-05	0	0	0	0	0	0	0	0	0	4.20833e-06	0	0	0	0	0	0	0	0	0	0	0	0	0	0	0	0	0
Enoyl-CoA hydratase domain-containing protein 3, mitochondrial	ECHDC3	Q96DC8	2			0	0	0	0	0	4.45151e-05	0	0	0	0	0	0	0	0	0	0	0	0	0	0	0	0	0	0	0	0	0	0	0	0	0	0	0	0	0
Enoyl-CoA hydratase, mitochondrial	ECHS1	P30084	15			0.000131734	7.98849e-05	4.67522e-05	0.000385772	0.00052578	0.000851531	0.000204448	0.000674354	9.57384e-05	0	0.00106704	0	0.000353993	0.000185358	0	0.000380996	0.000237021	0.000712661	0.000223799	0	0.000668521	0	0.000805795	0.000948047	0.000160074	0.00140887	0.00023601	0	0.00115177	0.000167415	0.000174792	0.000270114	0.000434348	0.000702936	0.000376234
Enoyl-CoA delta isomerase 1, mitochondrial	ECI1	P42126	4			0	3.47608e-05	0	0.000100633	0	0.000168767	0	9.02277e-05	0	0	6.92402e-05	0	6.19335e-05	5.97858e-05	0	5.13222e-05	0	3.9657e-05	0	0	5.8038e-05	0	0.000127085	8.24112e-05	0	0.000164642	0	0	9.85843e-05	0.000131917	1.74992e-05	0	4.42398e-05	0.0001172	6.91887e-05
Enoyl-CoA delta isomerase 2, mitochondrial	ECI2	O75521	7			0	0	0	0	0	3.93798e-05	0	8.26317e-06	0	0	1.30557e-05	0	0	0	0	7.32401e-05	0	0	0	0	0	0	0	2.27681e-05	0	0	0	0	1.0425e-05	3.2871e-05	0	0	1.18381e-05	0	0
Endothelial differentiation-related factor 1	EDF1	O60869	5			0	0	0	0	0	0	0	4.40503e-05	0	0	2.45215e-06	0	0	0	0	0	0	2.63391e-05	0	0	1.1127e-05	0	0	0	0	0	0	0	0	0	0	0	1.6755e-05	0	0
Early endosome antigen 1	EEA1	Q15075	18			0	0	0	2.82141e-05	0	4.1971e-05	0	3.26009e-05	0	0	1.3163e-05	0	2.67615e-05	0	0	0.000111663	6.25858e-05	0	1.67707e-05	0	0	0	1.17434e-05	1.34711e-05	0	2.28583e-05	0	0	0	4.05982e-05	0	0	2.51901e-05	2.79001e-05	6.43343e-06
Putative elongation factor 1-alpha-like 3;Elongation factor 1-alpha 1	EEF1A1P5;EEF1A1	Q5VTE0;P68104	29			0.0042027	0.003559	0.0057544	0.00342676	0.00310764	0.00211465	0.00173176	0.00450669	0.00448791	0.000787009	0.00124777	0.00244688	0.00245933	0.00211563	0.00113772	0.0017009	0.00220269	0.00200554	0.00403216	0.0016019	0.00256877	0.00263714	0.00248023	0.00180676	0.001516	0.00428604	0.00340549	0.000749462	0.0013018	0.00268292	0.00220784	0.00151304	0.00432097	0.00264078	0.00133915
Elongation factor 1-beta	EEF1B2	P24534	8			0	0	0	0	0	0.000126807	0	0.000180007	0	0	0.000144488	0	0	2.05122e-05	0	0	0	7.23965e-05	9.0958e-06	0	0.000118637	3.34339e-05	4.76263e-05	0.000128846	0	0	0	0	0.000106718	4.57071e-05	0	0	7.95163e-05	0.000134202	3.90063e-06
Elongation factor 1-delta	EEF1D	P29692	13			0.00106557	0.000404927	0.0012161	0.000804838	0.000574046	0.000567518	0.000778641	0.000857095	0.00099615	0	0.000153251	0	0.000813966	0.000280467	0	0.000857443	0.000966095	0.000432355	0.000281232	0.000594186	0.000512542	0.000350425	0.000290082	0.000250044	0.000358078	0.00037061	0.00125112	0	0.000284772	0.000649651	0.000298845	0.00064835	0.00109686	0.000410204	0.000177149
Eukaryotic translation elongation factor 1 epsilon-1	EEF1E1	O43324	1			4.81561e-05	8.25902e-06	0	1.87459e-05	0	1.04668e-05	0	2.01882e-05	0	0	4.85177e-06	0	2.25499e-05	1.37875e-05	0	1.2522e-05	0	1.61813e-05	0	0	4.75995e-06	0	1.75119e-06	3.61762e-06	0	0	0	0	2.57727e-06	9.81634e-06	0	0	6.62636e-05	4.54653e-06	0
Elongation factor 1-gamma	EEF1G	P26641	4			0	2.30069e-05	0	0	0	0.000185783	0	0.000132581	0	0	0	0	3.18404e-05	2.30244e-05	0	0	0	9.84827e-05	0	0	2.43461e-05	0	0	2.83677e-05	0	0	0	0	0	8.69599e-05	0	1.16263e-05	4.46413e-05	1.33499e-05	0
Elongation factor 2	EEF2	P13639	42			2.72124e-05	0.000668336	0.000259096	0	0	0.00070785	0	0.000453445	0	0	0.000365163	0.00016611	0	0.000373732	0	4.54165e-05	0	0.000170452	0.00034617	0	0.000114508	1.71226e-05	0.000646447	0.00029535	0	0.000902995	0	3.20641e-05	0	0.000224264	0.000292708	0	0.000655853	0.00144331	0.000525429
EF-hand domain-containing protein D2	EFHD2	Q96C19	16			0.00043539	0.000246377	0.000297435	0.000167498	0.000256003	0.000204802	5.37914e-05	0.000380825	0.000373605	0	0.000120739	0.000107985	0.000101965	0.000249097	0	0.000210116	0.000133761	0.000208309	0.000303186	0	0.000202222	4.93253e-05	0.000134506	7.14635e-05	0	0.000291374	0.00013637	0	3.07284e-05	0.00026328	0.000111033	0.000105929	0.000359579	9.11764e-05	9.50442e-05
Ephrin-B1	EFNB1	P98172	2			0	0	0	0	0	1.45538e-05	0	0	0	0	0	0	0	1.37326e-05	0	0	0	0	0	0	0	0	0	0	0	0	0	0	0	0	0	0	0	3.68465e-06	0
Ephrin-B2	EFNB2	P52799	1			3.5087e-05	2.26286e-05	0	2.45078e-05	3.65421e-05	0	0	1.77387e-05	0	0	0	0	2.93119e-05	0	0	2.20697e-05	0	0	2.17499e-05	0	1.24181e-05	0	7.48868e-06	0	0	6.02339e-06	2.97827e-05	0	0	0	0	0	0	1.13398e-05	0
EH domain-containing protein 1	EHD1	Q9H4M9	3			0	0	0	0	0	0	0	0	0	0	4.15258e-06	0	0	0	0	0	0	0	0	0	0	0	0	1.27068e-06	0	1.20814e-05	0	0	0	0	0	0	0	0	0
EH domain-containing protein 4	EHD4	Q9H223	3			0	2.62529e-05	0	0	0	3.32889e-05	0	2.3502e-05	0	0	0	0	0	1.83199e-05	0	0	0	0	0	0	0	0	0	0	0	0	0	0	0	0	0	0	2.16022e-05	0	0
Peroxisomal bifunctional enzyme;Enoyl-CoA hydratase/3,2-trans-enoyl-CoA isomerase;3-hydroxyacyl-CoA dehydrogenase	EHHADH	Q08426	7			0	0	0	0	0	2.11724e-05	0	0	0	0	0	0	0	0	0	0	0	0	0	0	0	0	0	0	0	6.71623e-05	0	0	0	0	0	0	2.88678e-05	0	8.64552e-06
Eukaryotic translation initiation factor 1;Eukaryotic translation initiation factor 1b	EIF1;EIF1B	P41567;O60739	5			0	0	0	0	0	0	0	4.55825e-05	0	0	1.9624e-06	0	0	0	0	0	0	0	0	0	5.03094e-05	0	2.25411e-05	1.19046e-05	0	0	0	0	0	0	0	0	0	1.40162e-05	0
Eukaryotic translation initiation factor 1A, X-chromosomal;Eukaryotic translation initiation factor 1A, Y-chromosomal	EIF1AX;EIF1AY	P47813;O14602	3			0	0	0	0	0	3.50983e-05	0	0	0	0	0	0	0	0	0	0	0	0	0	0	0	3.9438e-05	0	0	0	0	0	0	0	0	0	0	8.0259e-05	0	0
Eukaryotic translation initiation factor 2 subunit 1	EIF2S1	P05198	5			0.000175168	0.000100109	0	9.45167e-05	0.000107254	8.63263e-05	0.000126634	0.000145627	0.000145348	0	2.47408e-05	0	0	0	9.79778e-05	0.000111037	0	0.000116619	2.89145e-05	0.000117244	4.52624e-05	1.74068e-05	2.80769e-05	2.32235e-05	0.000111363	3.7996e-05	0	0	2.59788e-05	0.000150072	3.55754e-05	0	0	9.63695e-05	2.92668e-05
Eukaryotic translation initiation factor 2 subunit 2	EIF2S2	P20042	12			0	0	0	0	0	1.93506e-05	0	5.33444e-05	0	0	2.95894e-06	0	0	0	0	0	0	0	6.14544e-05	0	7.27056e-05	0	2.86881e-05	1.41878e-05	0	6.61538e-05	0	0	8.70772e-06	1.95312e-05	5.62345e-06	0	6.24243e-05	5.97236e-05	0
Eukaryotic translation initiation factor 2 subunit 3;Putative eukaryotic translation initiation factor 2 subunit 3-like protein	EIF2S3;EIF2S3L	P41091;Q2VIR3	5			0	2.43215e-05	0	2.95783e-05	0	3.29446e-05	2.20412e-05	0	0	0	0	0	0	1.74956e-05	0	2.9054e-05	0	2.52296e-05	0	0	0	0	6.54741e-05	9.84473e-06	0	7.40685e-05	2.60724e-05	0	0	0	0	0	3.44809e-05	8.9181e-05	2.56549e-05
Eukaryotic translation initiation factor 3 subunit A	EIF3A	Q14152	10			0	8.53473e-06	0	0	0	1.8139e-05	0	1.18178e-05	0	0	0	0	0	0	0	0	0	2.64328e-05	0	0	4.06325e-05	0	0	0	0	0	5.07519e-05	0	0	2.34972e-05	0	0	9.58339e-05	1.83954e-05	0
Eukaryotic translation initiation factor 3 subunit B	EIF3B	P55884	6			0	5.3924e-05	0	0	0	4.41973e-05	3.12161e-05	6.03518e-05	0	0	0	0	0	3.17304e-05	0	3.57524e-05	0	3.33744e-05	0	0	1.54669e-05	0	2.87597e-06	1.12132e-05	0	3.83061e-05	0	0	0	3.57521e-05	0	0	5.6753e-05	3.79765e-05	0
Eukaryotic translation initiation factor 3 subunit C;Eukaryotic translation initiation factor 3 subunit C-like protein	EIF3C;EIF3CL	Q99613;B5ME19	12			3.42997e-05	3.26308e-05	0	0	0	2.654e-05	0	7.07011e-05	0	0	5.71955e-06	0	0	0	0	0	0	5.26647e-05	0	0	1.93827e-05	0	8.14469e-06	5.81671e-06	0	1.08914e-05	0	0	5.11998e-06	1.59169e-05	0	0	0	1.09749e-05	2.00383e-06
Eukaryotic translation initiation factor 3 subunit D	EIF3D	O15371	3			0	2.57243e-05	0	0	0	0	0	0	0	0	0	0	0	0	0	0	0	0	0	0	5.04982e-06	0	0	9.3356e-06	0	0	0	0	0	0	0	0	0	3.98211e-06	0
Eukaryotic translation initiation factor 3 subunit G	EIF3G	O75821	6			0	0	0	3.59718e-05	0	2.10374e-05	0	0	0	0	2.69509e-05	0	0	0	0	0	9.03329e-05	0	0	0	3.79282e-05	0	2.54143e-05	0	0	0	0	0	2.26781e-05	0	0	0	0	1.61176e-05	0
Eukaryotic translation initiation factor 3 subunit H	EIF3H	O15372	2			0	0	0	0	0	0	0	0	0	0	6.7191e-06	0	0	0	0	0	0	0	1.75175e-05	0	0	0	2.64654e-05	1.44274e-05	0	2.98983e-05	0	0	1.20176e-05	1.20467e-05	2.15748e-05	0	0	0	0
Eukaryotic translation initiation factor 3 subunit I	EIF3I	Q13347	6			0	5.68521e-05	9.50901e-05	0	5.77873e-05	2.76142e-05	0	6.86242e-05	0	0	0	0	0	0	0	6.02919e-05	0	0	0	0	0	0	0	0	0	0	0	0	0	0	0	0	0.000171607	0	0
Eukaryotic translation initiation factor 3 subunit J	EIF3J	O75822	4			0	0	0	0	0	0	0	9.84844e-06	0	0	7.49378e-06	0	0	0	0	0	0	0	0	0	0	0	6.90151e-06	1.05209e-05	0	0	0	0	0	9.02675e-06	0	0	0	1.0716e-05	0
Eukaryotic translation initiation factor 3 subunit K	EIF3K	Q9UBQ5	2			0	0	0	0	0	0	0	7.74925e-06	0	0	0	0	0	0	0	0	0	0	0	0	0	0	0	0	0	0	0	0	0	0	0	0	0	0	0
Eukaryotic translation initiation factor 3 subunit M	EIF3M	Q7L2H7	1			0	0	0	0	0	3.41391e-06	0	0	0	0	0	0	0	0	0	0	0	0	0	0	0	0	0	0	0	0	0	0	0	0	0	0	6.6215e-06	0	0
Eukaryotic initiation factor 4A-I	EIF4A1	P60842	8			0	0	0	9.06149e-05	0	0	0	0	0	0	0	0	6.80109e-05	0	0	6.25876e-05	0	0	0	0	2.48586e-05	0	0	1.4592e-05	0	2.09125e-05	0	0	0	7.30402e-05	0	0	0.0002158	4.32626e-05	0
Eukaryotic initiation factor 4A-II;Eukaryotic initiation factor 4A-II, N-terminally processed	EIF4A2	Q14240	8			0	6.04073e-05	0	3.53458e-05	0	7.86205e-05	0	8.09503e-05	0	0	4.36842e-06	0	3.69732e-05	1.97069e-05	0	1.3958e-05	0	5.78951e-05	2.42786e-05	0	7.8057e-05	0	5.90297e-05	9.06754e-05	0	4.84611e-05	0	0	1.75482e-05	3.20838e-05	3.87784e-05	0	0.000264368	0.000160441	9.57322e-05
Eukaryotic initiation factor 4A-III;Eukaryotic initiation factor 4A-III, N-terminally processed	EIF4A3	P38919	7			0	0	0	0	0	2.97632e-05	0	1.18877e-05	0	0	1.59812e-05	0	0	0	0	0	0	1.51623e-05	1.59356e-05	0	1.26358e-05	0	4.45108e-05	0	0	4.60111e-05	0	0	1.56471e-05	0	1.9615e-05	0	9.70943e-05	4.09784e-05	0
Eukaryotic translation initiation factor 4B	EIF4B	P23588	15			0.000215342	1.69511e-05	0	2.57793e-05	9.53866e-05	8.11027e-06	2.05268e-05	3.54461e-05	0.000260427	0	1.49043e-05	0	7.21884e-05	1.38487e-05	0	0	0.000139485	0	9.85678e-05	0	7.79582e-05	7.65787e-05	2.86365e-05	2.26663e-05	0	6.75774e-05	0	0	3.19841e-05	1.91304e-05	2.70446e-05	7.80446e-05	0	0	8.77438e-06
Eukaryotic translation initiation factor 4E	EIF4E	P06730	3			0	0	0	0	0	0	0	0	0	0	0	0	0	0	0	0	0	0	0	0	0	0	1.20387e-05	1.38173e-05	0	0	0	0	0	0	0	0	0	1.53657e-05	0
Eukaryotic translation initiation factor 4E-binding protein 2	EIF4EBP2	Q13542	1			8.37124e-05	0	0	0	0	0	0	2.38558e-05	0	0	0	0	1.83056e-05	1.18365e-05	0	0	0	0	0	0	9.325e-06	0	0	0	0	0	2.9921e-05	0	0	1.56824e-05	0	0	1.57017e-05	0	0
Eukaryotic translation initiation factor 4 gamma 1	EIF4G1	Q04637	7			0	0	0	0	0	0	0	0	0	0	0	0	0	0	0	0	0	0	7.59148e-06	0	3.72968e-06	0	7.73649e-06	0	0	6.14612e-06	0	0	3.83646e-06	0	0	0	0	1.53982e-05	0
Eukaryotic translation initiation factor 4H	EIF4H	Q15056	6			8.52258e-05	2.05072e-05	0	0	0.000149226	3.53483e-05	0	0.000206997	0	0	2.05295e-05	0	4.10186e-05	1.15482e-05	0	0	0	9.09843e-05	0	0	6.6795e-05	3.91944e-05	3.72748e-05	3.25251e-05	0	1.95614e-05	5.9677e-05	0	3.90946e-05	3.08352e-05	0	0	0.00011426	3.9892e-05	9.01603e-06
Eukaryotic translation initiation factor 5	EIF5	P55010	8			8.38792e-05	0	0	0	0	2.99129e-05	0	4.77398e-05	0	0	2.1002e-06	0	0	0	0	0	0	0	0	0	0	0	9.02166e-06	1.70921e-06	0	0	0	0	0	2.81281e-05	0	0	0	0	0
Eukaryotic translation initiation factor 5A-1;Eukaryotic translation initiation factor 5A-1-like;Eukaryotic translation initiation factor 5A-2	EIF5A;EIF5AL1;EIF5A2	P63241;Q6IS14;Q9GZV4	9			0.000122653	0.000272341	0	0	0	0.000243626	0	6.24737e-05	0	0	0.000438857	0	0	1.1981e-05	0	0	0	0.000255814	0.000119503	0	0.000832799	8.43468e-05	8.86884e-05	0.000385503	0	0.000558872	0	0	0.000343598	0.000402709	0	4.19482e-05	7.30759e-05	0.000224859	3.50864e-05
Eukaryotic translation initiation factor 5B	EIF5B	O60841	2			0	0	0	0	0	0	0	0	0	0	0	0	0	0	0	0	0	0	0	0	0	0	0	0	0	0	0	0	0	0	0	0	0	7.99395e-06	0
Eukaryotic translation initiation factor 6	EIF6	P56537	4			0	5.99616e-05	0	6.37731e-05	9.13923e-05	3.42664e-05	0	4.68234e-05	0	0	9.58701e-06	0	5.22356e-05	1.73827e-05	0	0	0	0	0	0	1.36979e-05	0	1.39503e-05	0	0	0	9.95062e-05	0	0	4.58141e-05	0	0	0	2.36673e-05	5.75306e-06
ELAV-like protein 1	ELAVL1	Q15717	4			0.000132295	7.50842e-05	0	7.47629e-05	0.000104374	4.57184e-05	8.46393e-05	3.93224e-05	0.000168311	0	1.41099e-05	0.000150355	6.01233e-05	4.10395e-05	0	0	0.000135303	3.76992e-05	2.65471e-05	0	3.1387e-05	0	3.56626e-05	0	0	0	8.64862e-05	0	1.64847e-05	4.72469e-05	0	6.23503e-05	0.000126653	0	2.6285e-05
ER membrane protein complex subunit 1	EMC1	Q8N766	2			0	0	0	0	0	0	0	0	0	0	0	0	0	0	0	0	0	0	0	0	0	0	0	0	0	1.82103e-05	0	0	0	0	0	0	0	0	0
ER membrane protein complex subunit 2	EMC2	Q15006	1			0	1.75704e-05	0	0	0	2.06247e-05	0	0	0	0	0	0	3.81514e-05	0	0	0	0	0	0	0	0	0	0	0	0	0	0	0	0	3.08726e-05	0	0	2.79338e-05	0	0
ER membrane protein complex subunit 8	EMC8	O43402	2			0	0	0	0	0	0	0	0	0	0	0	0	0	0	0	0	0	0	0	0	0	0	0	0	0	0	0	0	0	0	0	0	2.42762e-05	0	0
EMILIN-1	EMILIN1	Q9Y6C2	17			0	0	0	0	0	0	0	0	0	0.00129379	0	0	0	0	0.0013748	0	6.2847e-05	0	0	0	0	0	0	0	0	0	0	0	0	0	0	0	0	0	0
Echinoderm microtubule-associated protein-like 2	EML2	O95834	5			0	6.41076e-06	0	0	0	1.61386e-05	0	0	0	0	0	0	0	0	0	0	0	0	0	0	7.28004e-06	0	0	0	0	0	0	0	0	8.2847e-06	0	0	0	1.95669e-05	0
Echinoderm microtubule-associated protein-like 4	EML4	Q9HC35	7			0.000103838	5.81892e-05	0	3.59435e-05	5.3583e-05	3.93409e-05	0	0.000147401	0	0	1.49439e-05	0	0.000111937	4.67691e-05	0	0	0	4.93298e-05	4.4162e-05	0	1.89802e-05	0	1.10647e-05	3.91325e-05	0	5.85916e-05	0	0	3.92079e-05	6.72831e-05	4.24362e-05	5.42314e-05	1.28925e-05	0	5.40356e-06
Endonuclease domain-containing 1 protein	ENDOD1	O94919	5			0	1.81215e-05	0	9.18351e-05	0	3.81134e-05	0	1.94597e-05	0	0	0	0	1.92022e-05	0.000133699	0	0.000124069	2.00628e-05	1.25893e-05	0	0	1.37019e-05	0	0	0	0	1.04074e-05	2.27594e-05	0	3.19451e-05	4.40566e-05	0	3.97008e-05	0	1.18397e-05	0
Endonuclease G, mitochondrial	ENDOG	Q14249	3			0	9.94662e-06	0	0	0	6.54729e-06	0	0	0	0	0	0	0	0	0	0	0	3.9478e-06	0	0	0	0	0	0	0	0	0	0	0	0	0	0	2.56064e-05	0	0
Alpha-enolase	ENO1	P06733	47			0.00147324	0.00589044	0.0009456	0.00261021	0.00340064	0.00299371	0.00176344	0.00387984	0.002553	0	0.00237167	0.00292654	0.000962916	0.00220742	0	0.00230573	0.000818524	0.00183723	0.00278996	0	0.00291504	0.00317051	0.00286716	0.00296701	0.000337723	0.00221788	0.000995731	0.00391737	0.00126889	0.00175945	0.00253181	0.00182293	0.00642267	0.00377817	0.00310887
Gamma-enolase	ENO2	P09104	5			0	1.93411e-05	0	0	0	0	0	0	0	0	0	0	0	0	0	0	0	2.12451e-05	0	0	0	0	0	1.25645e-06	0	0	0	0	0	0	0	0	0	0	0
Alpha-endosulfine;cAMP-regulated phosphoprotein 19	ENSA;ARPP19	O43768;P56211	2			0	0	0	0	0	0	0	2.95669e-05	0	0	0	0	0	0	0	0	0	0	1.20537e-05	0	0	1.50181e-05	0	0	0	0	0	0	0	0	0	0	0	0	0
Ectonucleoside triphosphate diphosphohydrolase 5	ENTPD5	O75356	2			0	0	0	0	0	2.05999e-05	0	0	0	0	0	0	0	0	0	0	0	0	0	0	0	0	1.6721e-05	0	0	9.01924e-06	0	0	0	2.59041e-05	0	0	0	1.83891e-05	4.03491e-06
Protein 4.1	EPB41	P11171	9			0	1.96452e-05	0	1.79109e-05	0	0	0	0.000105518	0	0	7.0782e-05	0	5.56584e-05	0.000118012	0	2.99545e-05	9.92307e-05	4.78289e-05	0	0	1.55634e-05	2.76315e-05	3.1012e-05	0	0	1.64207e-05	0.000357961	0	0.000938737	0.000320103	1.9524e-05	0	1.40208e-05	0	0.000591602
Band 4.1-like protein 1	EPB41L1	Q9H4G0	1			0	0	0	0	0	1.2755e-05	0	0	0	0	0	0	0	0	0	0	0	0	0	0	0	0	0	0	0	0	0	0	0	0	0	0	0	0	0
Band 4.1-like protein 2	EPB41L2	O43491	13			6.39014e-05	1.92651e-05	0	2.61691e-05	0	7.56962e-05	0	0	0	5.97997e-05	1.77442e-05	0	0	0	0	0	0	3.44517e-05	1.44908e-05	0	4.16054e-05	0	3.30778e-05	7.09235e-06	0	0	3.78751e-05	0	0	1.3939e-05	2.03019e-05	0	4.71737e-05	9.52038e-06	0
Band 4.1-like protein 3;Band 4.1-like protein 3, N-terminally processed	EPB41L3	Q9Y2J2	13			5.00084e-05	6.82105e-05	0.000106701	6.79423e-05	3.75748e-05	9.70567e-05	0	3.83121e-05	8.93805e-05	7.4268e-05	1.1848e-05	0.000218384	4.19592e-05	2.15051e-05	0.000168582	3.95703e-05	9.3489e-05	3.48472e-05	5.07762e-05	0.000257927	2.41179e-05	1.52596e-05	4.3333e-05	0	0	2.74817e-05	0.00018271	0	4.72824e-05	0.000180172	5.9454e-05	4.43911e-05	0	1.89431e-05	0
Erythrocyte membrane protein band 4.2	EPB42	P16452	3			0	0	0	0	0	0	0	0	0	0	2.89794e-05	0	0	0	0	0	0	3.47899e-05	0	0	0	0	0	0	0	0	0	0	0	0	0	0	0	0	0
Epithelial cell adhesion molecule	EPCAM	P16422	22			0.00147976	0.000487415	0.00226633	0.00155887	0.000652554	0.00196896	0.00100948	0.000920604	0.000557995	0.000143819	0.000793167	0.00255412	0.0017228	0.00136862	0	0.00177474	0.00247292	0.000983099	0.000185518	0.00275326	0.000158815	0	0.00044135	0.000231594	0.000926727	0.000841231	0.00239745	0	0.00150609	0.00183496	5.24863e-05	0.000568059	0.000538487	0.000563893	0.000128711
Bifunctional epoxide hydrolase 2;Cytosolic epoxide hydrolase 2;Lipid-phosphate phosphatase	EPHX2	P34913	3			0	0	0	0	0	0	0	0	0	0	0	0	0	0	0	0	0	0	0	0	0	0	2.50557e-06	0	0	0	0	0	0	0	0	0	0	3.37222e-06	0
Epiplakin	EPPK1	P58107	27			0	3.33581e-05	0	0.000155062	8.62319e-05	0.000167559	4.45401e-05	0.000255382	0	0	8.07088e-07	0	5.83086e-05	4.24063e-05	0	0.000106956	0	6.73659e-05	3.6821e-05	0	2.59448e-05	0	1.23946e-05	6.79559e-05	0	0.000142306	0.00013316	0	7.80517e-05	0.000123427	0	0	0.000196435	2.78171e-05	2.33799e-05
Bifunctional glutamate/proline--tRNA ligase;Glutamate--tRNA ligase;Proline--tRNA ligase	EPRS	P07814	16			4.82969e-05	8.4354e-05	0	0	0	3.79077e-05	0	6.5562e-05	0	0	4.99532e-05	6.81631e-05	0	7.50739e-06	0	0	0	4.68546e-05	3.82015e-05	0	1.31524e-05	0	4.56783e-05	9.70465e-06	0	0.000180992	0	0	0	2.29431e-05	4.15402e-05	0	4.60919e-05	0.000170885	3.01506e-05
Epidermal growth factor receptor substrate 15-like 1	EPS15L1	Q9UBC2	4			0	0	0	0	0	0	0	0	0	0	0	0	0	0	0	0	0	0	0	0	6.81905e-06	0	0	0	0	0	0	0	0	0	0	0	3.04958e-05	0	0
Epidermal growth factor receptor kinase substrate 8	EPS8	Q12929	2			0	0	0	0	0	0	0	0	0	0	1.78628e-06	0	0	0	0	0	0	0	0	0	3.455e-06	0	2.66045e-06	1.51894e-06	0	0	0	0	3.05092e-06	0	0	0	0	0	0
Epidermal growth factor receptor kinase substrate 8-like protein 1	EPS8L1	Q8TE68	1			0	0	0	0	0	0	0	1.20453e-05	0	0	0	0	0	0	0	0	0	0	0	0	0	0	0	0	0	0	2.42721e-05	0	0	0	0	0	0	0	0
Epidermal growth factor receptor kinase substrate 8-like protein 2	EPS8L2	Q9H6S3	4			0	4.59239e-05	0	0	0	0	0	0	0	0	0	0	0	0	0	0	0	0	0	0	0	0	0	0	0	0	0	0	0	0	0	0	0	0	0
Epidermal growth factor receptor kinase substrate 8-like protein 3	EPS8L3	Q8TE67	4			0	0	0	0	0	2.59439e-05	0	5.38715e-05	0	0	0	7.22032e-05	0	1.75012e-05	0	0	0	0	0	0.000136802	0	0	0	0	0	3.32163e-06	0	0	0	0	0	0	2.02478e-05	0	0
Eosinophil peroxidase;Eosinophil peroxidase light chain;Eosinophil peroxidase heavy chain	EPX	P11678	4			0	0	0	0	0	0	0	0	0	0	0	0	0	0	0	0	0	3.09783e-05	0	0	0	0	5.60539e-06	0	0	0	0	0	0	0	0	0	0	0	0
Endoplasmic reticulum aminopeptidase 1	ERAP1	Q9NZ08	1			3.37665e-05	2.10911e-05	0	0	0	0	0	0	0	0	0	0	0	0	0	0	0	0	0	0	0	0	0	0	0	0	2.69146e-05	0	0	0	0	0	0	0	0
Enhancer of rudimentary homolog	ERH	P84090	3			0.000221599	0.000166671	8.13946e-05	7.86158e-05	9.66429e-05	0.000209914	0	0.000529844	0.00016018	0.000116939	6.89258e-05	0	0.000102207	0.000120316	0	0	3.3849e-05	0	6.37745e-05	0	0.000133725	5.64394e-05	8.41659e-05	0.000105364	0	4.35878e-05	0	3.79957e-05	0.000129872	0.000389399	4.41569e-05	0	0.000175115	8.02388e-05	3.5674e-05
Erlin-1	ERLIN1	O75477	8			0	0	0	0	0	0	0	0	0	0	3.16611e-05	0	0	0	0	0	0	0	0	0	2.55319e-05	0	0	8.6352e-06	0	0.000117426	0	0	4.2256e-05	0	2.81912e-05	0	0	1.982e-05	2.23121e-05
Erlin-2	ERLIN2	O94905	10			0	2.71166e-05	0	0.000243896	1.71755e-05	7.55193e-05	4.61849e-05	3.87765e-05	0	0	5.20419e-05	0	0	0.000126503	0	8.37594e-05	0.00018688	2.86717e-05	1.12957e-05	9.28249e-05	3.1346e-05	0	7.49556e-05	5.36131e-05	0	0.000206526	3.40516e-05	0	0.000173742	9.34114e-05	0.000130977	2.79959e-05	2.37438e-05	6.09365e-05	3.75101e-05
ERO1-like protein alpha	ERO1L	Q96HE7	1			0	0	0	0	0	2.47612e-05	0	0	0	0	0	0	0	0	0	0	0	0	0	0	1.24582e-05	0	0	0	0	0	3.66879e-05	0	0	0	0	0	0	0	0
Endoplasmic reticulum resident protein 29	ERP29	P30040	12			0.000143075	0.00012173	0	0.000428858	0.000103504	0.000269238	0.000188455	0.000300094	0.000141768	0	0.000433764	0	0.000112139	0.000285088	0	0.000211665	0	0.000371881	0.000174375	0	0.000152693	0	0.000170204	6.67858e-05	0	0.000483027	0.000498791	0	0.000436287	0.000240164	0	0.00048004	0.000498699	0.000355543	3.03559e-05
Endoplasmic reticulum resident protein 44	ERP44	Q9BS26	18			8.3131e-05	0	0	0	5.53444e-05	0.000177912	0	2.44518e-05	3.59271e-05	0	3.91312e-05	7.04698e-05	0	0.000169174	0	0	9.73049e-05	6.23188e-05	1.24414e-05	0	6.60744e-05	0	0.00015853	0.000126058	0	0.000215433	0.000105749	0	9.34187e-05	2.91434e-05	2.41767e-05	0.000119008	0.00015763	0.000244481	8.96707e-05
S-formylglutathione hydrolase	ESD	P10768	5			0	0	0	0	2.7841e-05	4.97335e-05	0	0	0	0	0	0	0	0	0	0	0	0	6.12006e-05	0	7.77172e-05	0	8.5818e-05	3.60299e-05	0	2.85148e-05	0	0	0	0	6.56407e-05	0	1.26949e-05	0	5.05594e-05
Extended synaptotagmin-1	ESYT1	Q9BSJ8	2			0	5.60765e-06	0	0	0	9.95447e-06	0	0	0	0	0	0	0	0	0	0	0	0	0	0	0	0	0	0	0	0	0	0	0	0	0	0	0	0	0
Eukaryotic peptide chain release factor subunit 1	ETF1	P62495	5			0	0	0	0	0	0	0	1.04008e-05	0	0	0	0	0	0	0	0	0	8.46933e-06	0	0	0	0	0	0	0	2.48286e-05	0	0	0	0	0	0	4.17116e-05	2.51969e-05	0
Electron transfer flavoprotein subunit alpha, mitochondrial	ETFA	P13804	19			0	0.000127117	0.00012783	0.000439968	0.000415505	0.00110481	0.000146265	0.000116779	0.000238566	0	0.00070478	0.000160056	0.000174535	0.000659318	0	0.000556161	0.000635344	0.000451018	0.000293424	0.000215021	0.000637437	0	0.000907329	0.000731034	0	0.00137348	0.000447463	0	0.000811109	0.000362392	0.00017263	0.000210905	0.000241421	0.000397933	0.000670235
Electron transfer flavoprotein subunit beta	ETFB	P38117	27			0.000699419	0.000614076	0.00069571	0.00108523	0.00206145	0.00120021	0.000551504	0.00174851	0.00084671	0.000404641	0.000550456	0.00226807	0.000942702	0.00113076	0.00292272	0.00214059	0.00118399	0.00187689	0.000556702	0.00393784	0.000876584	8.59608e-05	0.000661818	0.000710247	0.000527734	0.00138738	0.00183484	0	0.00116236	0.00127818	0.000336519	0.00166545	0.00111133	0.000523041	0.000750331
Electron transfer flavoprotein-ubiquinone oxidoreductase, mitochondrial	ETFDH	Q16134	4			0	1.90682e-05	0	0	0	0	0	2.66602e-05	0	0	1.83306e-05	0	0	6.10245e-05	0	0	0	0	0	0	0	0	4.02753e-05	1.24902e-05	0	6.85927e-05	0	0	2.42922e-05	2.80198e-05	0	0	0	2.62198e-05	3.28103e-05
Persulfide dioxygenase ETHE1, mitochondrial	ETHE1	O95571	17			0.000279763	0.00189697	0.0006134	0.00243967	0.00101919	0.00271802	0.000827956	0.00265287	6.60563e-05	8.19919e-05	0.000714362	0.00083877	0.000736033	0.00179956	0	0.00239009	0.00125683	0.00232894	0.00111994	0	0.000464169	1.14715e-05	0.00125447	0.000301117	0.000226553	0.00100865	0.00151609	0	0.000932533	0.00184669	0.000651914	0.00162739	0.00258398	0.000908928	0.000746685
Ena/VASP-like protein	EVL	Q9UI08	1			0	0	0	0	0	0	0	0	0	0	0	0	0	0	0	0	0	0	0	0	0	0	0	0	0	0	0	0	0	0	0	0	0	0	0
Envoplakin	EVPL	Q92817	3			0	0	0	0	0	0	0	2.32024e-05	0	0	0	0	0	0	0	0	0	0	0	0	0	0	0	0	0	0	0	0	0	0	0	0	0	0	0
RNA-binding protein EWS	EWSR1	Q01844	4			0	0	0	0	0	0	0	0	0	0	0	0	0	0	0	0	0	0	7.68266e-05	0	6.77808e-05	5.09267e-05	5.31676e-05	2.26036e-05	0	0	0	0	2.52878e-05	2.89733e-05	6.63887e-05	0	0	8.00603e-05	0
Exosome complex component RRP41	EXOSC4	Q9NPD3	1			0	0	0	0	0	0	0	0	0	0	0	0	0	0	0	0	0	0	0	0	0	0	0	0	0	0	0	0	0	0	0	0	1.40039e-05	0	0
Ezrin	EZR	P15311	60			0.0013395	0.00446041	0.00171174	0.00285814	0.00293859	0.00376771	0.00134988	0.00258232	0.00270237	0	0.00105763	0.00302208	0.00202694	0.00135647	0.000546925	0.00256447	0.000571321	0.00271437	0.00187629	0.00167223	0.000651304	0.000358822	0.0015104	0.000932913	0.00185902	0.00317927	0.00344228	0.000118845	0.000620513	0.0030544	0.00121212	0.00261865	0.00186472	0.00195149	0.00152075
Junctional adhesion molecule A	F11R	Q9Y624	2			0	0	0	0	0	0	0	0	0	0	0	0	0	0	0	0	0	0	0	0	0	0	0	0	0	0	0	0	2.17586e-05	0	0	0	0	0	0
Coagulation factor XIII A chain	F13A1	P00488	4			0	0	0	0	0	0	0	0	0	0	2.79384e-06	0	0	0	0	0	0	0	0	0	0	0	0	3.86937e-05	0	0	0	0	0	0	0	0	0	1.79207e-05	0
Prothrombin;Activation peptide fragment 1;Activation peptide fragment 2;Thrombin light chain;Thrombin heavy chain	F2	P00734	13			0	1.58058e-05	0	0	0	9.00112e-06	0	0	0	0	0.000124918	0	0	6.96026e-05	0	0	0	1.95829e-05	0	0	0.000142169	0	3.76795e-05	0.000191879	0	1.60015e-05	0	0	9.81831e-05	2.31467e-05	0	0	0	1.31241e-05	0
Fatty acid-binding protein, liver	FABP1	P07148	20			0.0104432	0.00784597	0.00323183	0.00431042	0.00590546	0.0102263	0.00145261	0.00849247	0.00573523	0	0.00340435	0.0041103	0.00258564	0.00513922	0	0.00189708	0.00058111	0.00450071	0.0158495	0.00123721	0.00983114	0.00187961	0.00649021	0.00401508	0.00029883	0.00860555	0.00392005	0.0105358	0.0053791	0.00467031	0.00612541	0.0124476	0.00914252	0.0135993	0.0069374
Fatty acid-binding protein, intestinal	FABP2	P12104	6			0	0	0	0	3.82287e-05	1.74044e-05	0	0	0	0	5.6706e-05	0	0	0	0	0	0	0	0.000352836	0	0.000185656	0	0	0	0	5.522e-05	0	7.24973e-05	2.67441e-05	5.22927e-05	0.000272819	0	0	0.000256301	0.000106342
Fatty acid-binding protein, epidermal	FABP5	Q01469	15			0.00247539	0.00154928	4.79261e-05	0.000678256	0.00150038	0.00027554	0.000562347	0.00174204	5.12409e-05	0.000166418	0.000738101	8.35709e-05	0.000417332	0.000256039	0	0.000186897	0.000636931	0.000368977	0.000823893	0.000388835	0.00110089	0.00109819	0.000909738	0.000506118	0	0.00076668	0.000803942	0.00101369	0.000592966	0.000217641	0.0009104	0.000736145	0.00122755	0.00214761	0.000352268
FAS-associated factor 2	FAF2	Q96CS3	1			0	0	0	0	0	0	0	0	0	0	0	0	0	0	0	0	0	7.97366e-06	0	0	0	0	0	0	0	2.26485e-05	0	0	0	0	0	0	0	0	0
Acylpyruvase FAHD1, mitochondrial	FAHD1	Q6P587	3			0	0	0	0	0	3.24228e-05	0	9.42094e-06	0	0	7.54216e-05	0	0	0	0	0	0	0	0	0	3.37699e-05	0	5.60402e-05	1.70203e-05	0	8.30252e-06	0	0	4.15576e-05	1.38811e-05	0	0	1.58348e-05	2.1725e-05	3.07972e-06
Protein NOXP20	FAM114A1	Q8IWE2	5			0	0	0	0	0	2.58873e-05	0	1.55918e-05	0	0	0	0	0	0	0	0	0	0	0	0	0	0	0	0	0	0	0	0	0	0	0	0	5.29496e-06	0	0
Constitutive coactivator of PPAR-gamma-like protein 1	FAM120A	Q9NZB2	6			9.08948e-05	0	0	0	0	3.97e-05	0	3.66254e-05	0	0	9.85057e-06	0	0	0	0	0	0	1.09541e-05	2.01658e-05	0	0	0	9.7169e-06	0	0	3.42294e-05	0	0	9.9019e-06	0	1.11431e-05	0	2.65044e-05	1.41716e-05	6.5322e-06
Niban-like protein 1	FAM129B	Q96TA1	2			0	0	0	0	0	0	0	0	0	0	6.18134e-05	0	0	0	0	0	0	0	0	0	0	0	0	0	0	0	0	0	0	0	0	0	0	0	0
Protein FAM136A	FAM136A	Q96C01	4			8.10545e-05	3.48351e-05	7.58993e-05	0.000108764	6.99713e-05	0	9.70654e-05	0.00013256	0.000100197	0	0	0.000187457	6.47094e-05	2.29311e-05	0.000115258	4.40258e-05	6.6917e-05	4.80235e-05	0	9.64284e-05	1.94863e-06	0	0	0	5.52724e-05	0	0.00014234	0	1.18911e-05	9.29901e-05	0	0.000102716	7.4312e-05	1.47576e-05	0
Protein FAM162A	FAM162A	Q96A26	11			0	0.000146772	0	0.000166078	0.000107556	0.000181237	7.07742e-05	0.00019179	0	0	0.000143697	0	0.000110459	0.000295197	0	0	0.000181103	0.000213898	8.92636e-05	0	8.36735e-05	0	0.000141417	9.96175e-05	0	0.000239628	0.000111774	0	0.000249201	0.000163679	3.86688e-05	5.42179e-05	0	4.15833e-05	0.000115374
BRISC complex subunit Abro1	FAM175B	Q15018	2			0	0	0	0	0	0	0	0	0	0	0	0	0	0	0	0	0	0	0	0	0	0	1.4479e-05	0	0	0	0	0	0	0	0	0	0	0	0
Protein FAM3C	FAM3C	Q92520	3			0	0	0	0	0	2.59409e-05	0	8.27277e-05	0	0	7.04921e-06	0	0	0	0	0	0	0	0	0	1.91835e-05	0	0	1.41616e-05	0	0	0	0	7.4528e-06	0	0	0	0	3.1656e-06	0
Protein FAM3D	FAM3D	Q96BQ1	11			0	0.000145743	6.22914e-05	0.000190208	0.000103659	0.000199514	7.65701e-05	0.000214198	0	0	0.000287385	0	6.93899e-05	0.000300491	0	0.000257584	0.000174906	3.62055e-05	4.55425e-05	0	0.000142771	0	0.00012924	0.000220222	0	0.000184256	0.000132842	0	0.000245671	0.000238966	6.85149e-05	8.95199e-05	7.94825e-05	6.82195e-05	7.34095e-05
Protein FAM49B	FAM49B	Q9NUQ9	2			0	0	0	0	0	0	0	0	0	0	3.68712e-06	0	0	0	0	0	0	0	1.23655e-05	0	0	0	1.45299e-05	7.287e-06	0	0	0	0	0	0	0	0	0	0	0
Protein FAM83H	FAM83H	Q6ZRV2	1			0	0	0	0	0	0	0	0	0	0	0	0	0	0	0	0	0	0	0	0	0	0	0	0	0	0	0	0	0	0	0	0	1.15539e-05	0	0
Protein FAM98B	FAM98B	Q52LJ0	4			0	2.61907e-05	0	0	3.46029e-05	0	1.7404e-05	2.80713e-05	0	0	0	0	0	1.42388e-05	0	1.40246e-05	0	0	0	0	4.63101e-05	0	1.8307e-05	0	0	1.81304e-05	2.59319e-05	0	0	1.45704e-05	0	0	5.49369e-05	0	0
Phenylalanine--tRNA ligase alpha subunit	FARSA	Q9Y285	3			0	2.32401e-05	0	2.27776e-05	0	1.94679e-05	0	2.88332e-05	0	0	1.75936e-06	0	0	0	0	0	0	1.56047e-05	0	0	1.87319e-06	0	2.25603e-06	2.20604e-06	0	0	0	0	0	1.48075e-05	0	0	0.000119395	2.91251e-06	0
Phenylalanine--tRNA ligase beta subunit	FARSB	Q9NSD9	5			0	7.50462e-06	0	0	0	5.42968e-06	0	8.28352e-06	0	0	0	0	0	0	0	0	0	0	0	0	0	0	6.21549e-06	0	0	0	0	0	0	0	0	0	2.20217e-05	2.68121e-05	0
Tumor necrosis factor receptor superfamily member 6	FAS	P25445	3			0	0	0	0	0	0	0	0	0	0	5.40657e-06	0	0	0	0	0	0	0	2.30981e-05	0	1.11302e-05	0	1.99666e-05	8.91761e-06	0	0.000113379	0	0	2.16007e-05	0	0	0	0	0	0
Fatty acid synthase;[Acyl-carrier-protein] S-acetyltransferase;[Acyl-carrier-protein] S-malonyltransferase;3-oxoacyl-[acyl-carrier-protein] synthase;3-oxoacyl-[acyl-carrier-protein] reductase;3-hydroxyacyl-[acyl-carrier-protein] dehydratase;Enoyl-[acyl-carrier-protein] reductase;Oleoyl-[acyl-carrier-protein] hydrolase	FASN	P49327	9			0	0	0	0	0	0	0	0	0	0	0	0	0	0	0	0	0	0	0	0	0	0	1.10799e-05	3.43591e-07	0	7.96603e-06	0	0	0	6.92906e-06	0	0	0	5.95503e-05	0
40S ribosomal protein S30	FAU	P62861	2			0	0	0	0	0	2.14472e-05	0	8.13865e-05	0	0	0	0	0	0	0	0	0	8.59808e-06	0	0	0	0	0	2.39726e-05	0	0	0	0	0	1.07742e-05	0	0	0	0	0
rRNA 2-O-methyltransferase fibrillarin	FBL	P22087	7			0	2.41712e-05	8.45871e-05	7.33167e-05	7.65683e-05	4.56123e-05	3.43609e-05	9.3793e-05	4.722e-05	0	0	0	4.53182e-05	5.29629e-05	0	3.65508e-05	0	9.14828e-05	7.12273e-05	0	7.02793e-05	0	4.89934e-05	0	0	9.88212e-05	0	0	3.94419e-05	5.61646e-05	4.26691e-05	2.46014e-05	8.84585e-05	0	0
Filamin-binding LIM protein 1	FBLIM1	Q8WUP2	3			5.12742e-05	0	0	0	0	1.15463e-05	0	0	0	0	2.20073e-06	0	0	0	0	0	0	0	0	0	4.86785e-06	0	0	0	0	0	0	0	0	2.35242e-05	0	0	0	3.01222e-06	0
Fibulin-1	FBLN1	P23142	4			0	0	0	0	0	0	0	0	0	0	0	0	0	0	0	0	0	0	0	0	1.628e-05	2.78009e-05	0	1.54145e-05	0	0	0	0	8.35647e-06	0	0	0	0	0	0
Fibulin-2	FBLN2	P98095	1			0	0	0	0	0	0	0	0	0	0	0	0	0	0	0	0	0	0	0	0	0	0	0	0	0	0	0	0	0	0	0	0	0	0	0
Fibrillin-1	FBN1	P35555	30			0	0	0	0	0	0	0	0	0	0.000151347	0	0	0	0	0	0	0.000137737	0	0	0	0	0	0	0	0	0	0	0	0	0	0	0	0	0	0
Fructose-1,6-bisphosphatase 1	FBP1	P09467	7			5.63162e-05	4.30563e-05	0	3.00596e-05	0	1.76226e-05	1.98613e-05	1.65624e-05	0	0	0	0	0	0	0	3.35721e-05	0	1.11695e-05	0	0	0	0	6.31792e-06	1.93935e-06	0	0	0	0	0	1.85339e-05	0	0	3.88221e-05	4.02827e-05	1.09913e-05
IgGFc-binding protein	FCGBP	Q9Y6R7	111			0.0154559	0.0113461	0.0066698	0.019823	0.0267483	0.00667994	0.00940375	0.00566551	0.0071348	0.000707131	0.0113406	0.0117356	0.0237088	0.00881037	0.00036512	0.0509714	0.00721656	0.00217458	0.00580053	0.00594312	0.018025	0.0018423	0.00428099	0.0138185	0.0326137	0.006442	0.00805502	0.00762644	0.00977875	0.0134275	0.0211244	0.00811314	0.00221358	0.022311	0.0160665
Adrenodoxin, mitochondrial	FDX1	P10109	3			0	0	0	0	0	3.11157e-05	0	2.84157e-05	0	0	0	0	0	4.80794e-05	0	0	0	0	0	0	0	0	0	9.83348e-06	0	0	0	0	2.59473e-05	0	0	0.000115387	2.81071e-05	0	0
NADPH:adrenodoxin oxidoreductase, mitochondrial	FDXR	P22570	5			0	0	0	2.84925e-05	2.71832e-05	2.42506e-05	0	4.24889e-05	0	0	0	0	0	0	0	5.25789e-05	3.7927e-05	2.83865e-05	0	0	0	0	0	0	0	0	2.56655e-05	0	0	0	0	0	3.90577e-05	0	0
Fer-1-like protein 6	FER1L6	Q2WGJ9	2			0	0	0	0	0	0	0	0	0	0	0	0	0	0	0	0	0	0	0	0	0	0	0	0	0	0	0	0	0	0	0	0	0	0	0
Fibrinogen alpha chain;Fibrinopeptide A;Fibrinogen alpha chain	FGA	P02671	48			0.00256964	0.000813965	0.000591911	0.000814178	0.00108987	0.000914852	0.00382785	0.000389216	0	0.000993044	0.00305015	0	0.000275035	0.000795321	0.00178099	9.98071e-05	0.000762043	0.00296064	0.0018858	0.0021848	0.00382769	0.00271436	0.00310547	0.00509972	0.00137895	0.000447816	0.000375424	0	0.00121894	0.00144081	0.00693397	0.000160111	0	0.001958	0.00496732
Fibrinogen beta chain;Fibrinopeptide B;Fibrinogen beta chain	FGB	P02675	26			0.00077883	0.000154608	0	0.000240898	0.00042053	0.000419062	0.00228701	4.80581e-05	0	0	0.00276833	0	0.000192264	0.00039163	0	0.000264542	4.39218e-05	0.00091843	0.00101105	0	0.00238367	0.000677877	0.00197319	0.00306883	0.000463261	0.000526405	0	0.000158376	0.00048512	0.000603329	0.00206391	0.000170687	0	0.00180657	0.00136711
Fibrinogen gamma chain	FGG	P02679	24			0	6.34909e-05	0	6.653e-05	7.13693e-05	0.000234028	0.000491907	0	0	0	0.00331954	0	5.20559e-05	0.000465803	0	5.58692e-05	0.000102324	0.000581387	0.00401238	0	0.00270133	0.00145087	0.00325044	0.00421338	0	0.0014155	0	0.00294979	0.00115146	0.000631548	0.00748387	0.000201644	0	0.00193742	0.00439787
Fumarate hydratase, mitochondrial	FH	P07954	22			0	0.000308014	0	0.000338416	0.000773221	0.000836496	0.000549256	0.000521118	7.41283e-05	0	0.000522528	9.5465e-05	0.000342036	0.000464046	0	0.00137897	3.8765e-05	0.000795618	0.000388595	0	0.000300952	0	0.000600258	0.000385896	4.47813e-05	0.000880325	0.00126839	0	0.000616185	0.000258538	0.000148529	0.000208218	0.000693676	0.000481574	0.000402936
Four and a half LIM domains protein 1	FHL1	Q13642	14			0	7.3139e-05	0	0	0	0	2.48916e-05	0	0	0	0.000426921	4.90331e-05	0	0	0	0	0	0	2.69234e-05	0	4.24088e-05	0.000498828	0.000105409	9.07851e-05	0	0	5.41156e-05	0	9.76946e-05	0	1.16091e-05	0	0	0.000176314	7.54615e-06
Four and a half LIM domains protein 2	FHL2	Q14192	6			0	0	0	0	0	0	0	0	0	0	6.3776e-06	0	0	0	0	0	0	0	6.46668e-05	0	8.24604e-06	0	1.81975e-05	0	0	5.57756e-05	0	0	0	0	2.66081e-05	0	0	0	0
Mitochondrial fission 1 protein	FIS1	Q9Y3D6	2			0	0	0	0	0	0	0	0	0	0	1.58061e-05	0	0	0	0	0	0	0	0	0	2.49936e-05	0	2.25273e-05	2.29679e-06	0	0	0	0	1.95166e-05	0	0	0	0	0	0
Peptidyl-prolyl cis-trans isomerase FKBP1A	FKBP1A	P62942	6			0.000310474	0.00046627	0	0.000197963	0.000488671	0.000254221	0.000198493	0.000263075	0.00056252	0	0.0001281	0.000211891	0.000127999	0.000186169	0.000304493	0	0.000187718	0.000111456	0.000331226	0.000348734	0.000382625	0.00015981	0.000335507	0.000129521	9.8393e-05	0.000202551	0.000188696	0.000204797	6.78522e-05	0.000177015	0.000195004	0.000292894	0.000202573	0.000349053	0.00010102
Peptidyl-prolyl cis-trans isomerase FKBP2	FKBP2	P26885	7			0	3.37934e-05	0	3.99444e-05	0	0	0	5.97256e-05	0	0	8.09611e-05	0	0	0	0	0	0	1.19346e-05	8.70983e-05	0	3.35064e-05	0	7.73236e-05	6.33991e-05	0	0.000147385	0	0	7.91141e-05	6.13702e-05	4.87764e-06	0.00017275	0	6.3898e-05	4.29415e-05
Peptidyl-prolyl cis-trans isomerase FKBP3	FKBP3	Q00688	6			0	4.38147e-05	0	0	0	1.87563e-05	0	4.2442e-05	0	0	1.83513e-05	0	0	0	0	0	0	2.7432e-05	0	0	6.82162e-05	5.33749e-05	2.17267e-05	0	0	6.16977e-05	0	2.7971e-05	0	2.00053e-05	0	0	2.8199e-05	3.77087e-05	0
Peptidyl-prolyl cis-trans isomerase FKBP4;Peptidyl-prolyl cis-trans isomerase FKBP4, N-terminally processed	FKBP4	Q02790	9			0	2.79976e-05	0	0	0	5.03543e-05	0	7.23439e-05	0	0	2.97193e-05	0	0	3.67744e-05	0	0	0	0	0	0	8.08616e-05	0	7.84112e-06	0	0	6.20748e-05	0	0	2.2015e-05	4.88717e-05	0.000103019	0	7.45751e-05	4.7258e-05	0
Peptidyl-prolyl cis-trans isomerase FKBP5;Peptidyl-prolyl cis-trans isomerase FKBP5, N-terminally processed	FKBP5	Q13451	2			0	0	0	0	0	0	0	0	0	0	0	0	0	0	0	0	0	0	0	0	0	0	0	0	0	0	0	0	0	0	0	0	0	0	0
Filaggrin	FLG	CON__P20930;P20930	25			0	2.81358e-05	0	0	0	0	0	0.00117802	0	0	0	0	0	0	0	0	0	0	0	0	0	0	0	0	0	0	0	0	0	0	0	0	0	0	0
Filaggrin-2	FLG2	CON__Q5D862;Q5D862	5			0	1.06019e-05	0	0	0	0	0	7.48571e-05	0	0	0	0	0	0	0	0	0	0	0	0	0	0	0	0	0	0	0	0	0	0	0	0	0	0	0
Protein flightless-1 homolog	FLII	Q13045	5			0	1.82597e-05	0	0	0	2.42789e-05	0	4.19827e-06	0	0	0	0	0	0	0	7.00519e-06	0	2.89215e-06	0	0	0	0	2.85808e-06	0	0	0	0	0	0	1.92155e-06	0	0	4.73385e-05	3.62033e-05	0
Filamin-A	FLNA	P21333	144			0	0.00123268	0	4.57933e-05	0.000167007	8.05838e-05	0.000903852	0	0	0.0472976	0.00162927	0	0.000137715	4.58687e-05	0.000256718	0	0.000582144	0.000125123	2.324e-05	0	0.00083553	0.00321142	0.000365816	0.000869483	0	1.9677e-05	0.000162929	0	0.000186399	0.000185107	5.70017e-05	0	2.96337e-05	0.000802073	0.000279098
Filamin-B	FLNB	O75369	180			0.00302874	0.00360858	0.00363439	0.00454167	0.00379865	0.00858075	0.00148633	0.0047649	0.00133978	0.00261385	0.00296289	0.00291387	0.00464771	0.00372256	0.000758511	0.00744568	0.00104821	0.00421957	0.00479593	0.0015893	0.00316867	0.000425465	0.00331405	0.0030542	0.00115827	0.00901947	0.00432754	0.000747118	0.00421278	0.00738249	0.00389565	0.00280502	0.00450037	0.00620235	0.0018686
Filamin-C	FLNC	Q14315	54			0	0	0	0	0	0	0	0	0	0.00269858	0	0	0	0	0	0	0	0	0	0	0	0	0	0	0	0	0	0	0	0	0	0	0	0	0
Flotillin-1	FLOT1	O75955	12			3.08297e-05	0	0	0.000213194	2.86141e-05	3.15343e-05	9.10247e-05	7.47684e-05	3.86025e-05	0.000195152	9.76586e-06	5.23849e-05	4.41072e-05	8.18231e-05	0	0.000146431	7.54536e-05	6.17453e-05	0	0.000129181	0	0	1.80764e-05	0	0	0	6.42251e-05	0	0	4.42047e-05	0	0.000152854	5.06443e-06	0	0
Flotillin-2	FLOT2	Q14254	4			0	0	0	0	0	0	0	0	0	0	2.25335e-06	0	0	0	0	0	0	0	0	0	1.87207e-05	0	9.93374e-06	1.18677e-06	0	1.65412e-05	0	0	5.06574e-05	0	9.40484e-06	0	7.94783e-06	0	5.79601e-06
Fibromodulin	FMOD	Q06828	2			0	0	0	0	0	0	0	0	0	0	0	0	0	0	0	0	0	0	0	0	0	0	0	0	0	0	0	0	0	0	0	0	0	0	0
Fibronectin;Anastellin;Ugl-Y1;Ugl-Y2;Ugl-Y3	FN1	P02751	12			0	1.97367e-05	0	0	0	0	0	0	0	9.34993e-05	0	0	0	0	0	0	0	2.47549e-05	0	0	0	0	0	0	0	0	0	0	0	0	0	0	0	0	0
Ferritin heavy chain;Ferritin heavy chain, N-terminally processed	FTH1	P02794	6			0	0	0	0	0	0	0	0	0	0	2.97325e-05	0	0	0	0	0	0	0	0	0	3.5694e-06	2.88611e-05	2.88513e-06	1.42004e-05	0	1.86126e-05	0	0	1.98064e-06	0	0	0	0	4.03604e-06	0
Far upstream element-binding protein 1	FUBP1	Q96AE4	21			0.000508544	8.16297e-05	0.00015687	0.000275468	0.000205539	0.000250866	0.000175749	0.000365127	0.000417342	0	7.64853e-05	0.000111046	0.00032246	0.000121474	0.000108771	0	0.000405678	8.46069e-05	0.000120537	0.000232414	0.000173485	0.000162041	9.02923e-05	4.05305e-05	7.23425e-05	0.000134771	0.000251204	0	3.55486e-05	0.000298753	5.12643e-05	0.000284537	6.18379e-05	9.87692e-05	6.19307e-05
Far upstream element-binding protein 3	FUBP3	Q96I24	7			8.93997e-05	3.82106e-05	0	0	0	1.44217e-05	0	1.42486e-05	0	0	0	6.68586e-05	0	9.40827e-05	0	0	0	0	0	0	5.54953e-05	0	0	0	0	0	0	0	0	0	0	0	0	0	0
Tissue alpha-L-fucosidase	FUCA1	P04066	2			0	0	0	0	0	0	0	0	0	0	0	0	0	0	0	0	0	0	0	0	3.70831e-06	0	0	2.52466e-06	0	0	0	0	0	8.93333e-06	0	0	0	1.63602e-06	0
RNA-binding protein FUS	FUS	P35637	5			0	0	0	0	0	0	0	0	0	0	3.84017e-05	0	0	0	0	0	0	0	0	0	2.14354e-05	0	0	1.33105e-05	0	0	0	0	0	0	0	0	0	0	0
FXYD domain-containing ion transport regulator 3	FXYD3	Q14802	1			0	5.21585e-05	0	0	0.00011865	0.000352722	0	0.000103774	0	0	0.000207535	0	0	0.000143023	0	6.10068e-05	0	0.000129921	0.000275814	0	0.000256821	0	0.000398134	0.000183559	0	0.000849241	0	0	0.00058132	0.000110177	0.000339068	0	0.000106347	0.00019077	0.000165621
Ras GTPase-activating protein-binding protein 1	G3BP1	Q13283	4			0	0	0	0	0	0	0	6.23944e-06	0	0	0	0	0	0	0	0	0	0	0	0	0	0	0	0	0	0	0	0	0	0	0	0	2.46967e-05	0	0
Ras GTPase-activating protein-binding protein 2	G3BP2	Q9UN86	1			0	0	0	0	0	0	0	0	0	0	0	0	0	0	0	0	0	0	0	0	0	0	0	0	0	0	0	0	0	0	0	0	0	1.49629e-05	0
Lysosomal alpha-glucosidase;76 kDa lysosomal alpha-glucosidase;70 kDa lysosomal alpha-glucosidase	GAA	P10253	2			0	0	0	0	0	0	0	0	0	0	0	0	0	0	0	0	0	0	0	0	1.63218e-05	0	0	0	0	0	0	0	0	0	0	0	0	0	0
Growth arrest and DNA damage-inducible proteins-interacting protein 1	GADD45GIP1	Q8TAE8	4			0	0	0	0	0	1.47973e-05	0	6.56006e-05	0	0	0	0	2.26263e-05	0	0	0	0	8.98591e-06	0	0	0	0	0	6.07381e-06	0	0	0	0	1.71916e-05	5.42035e-05	0	0	0.000109982	0	0
Cyclin-G-associated kinase	GAK	O14976	1			0	0	0	0	0	0	0	0	0	0	0	0	0	0	0	0	0	0	0	0	0	0	0	0	0	0	0	0	0	0	0	0	0	0	0
Galactokinase	GALK1	P51570	1			0	0	0	0	0	0	0	0	0	0	0	0	0	0	0	0	0	0	0	0	0	0	0	0	0	0	0	0	0	0	0	0	6.37681e-06	0	0
Aldose 1-epimerase	GALM	Q96C23	3			0	0	0	0	5.13088e-05	8.32487e-06	0	0	0	0	2.17146e-05	0	0	1.63861e-05	0	0	0	0	6.49743e-05	0	3.67601e-05	1.97817e-05	3.32003e-05	2.80836e-05	0	2.18269e-05	0	0	1.22204e-05	0	1.42137e-05	0	0	5.16031e-05	1.43142e-05
Polypeptide N-acetylgalactosaminyltransferase 3	GALNT3	Q14435	2			0	0	0	0	0	0	0	0	0	0	1.9078e-05	0	0	0	0	0	0	0	0	0	1.87834e-05	0	0	0	0	8.29025e-05	0	0	5.22994e-05	0	3.59508e-05	0	0	3.53752e-05	2.45646e-05
Polypeptide N-acetylgalactosaminyltransferase 5	GALNT5	Q7Z7M9	1			0	0	0	0	0	0	0	0	0	0	0	0	0	2.59141e-05	0	0	0	0	0	0	0	0	0	0	0	0	0	0	0	1.83676e-05	0	0	0	0	0
N-acetylgalactosaminyltransferase 7	GALNT7	Q86SF2	5			0	0	0	0	0	0	0	0	0	0	5.38002e-06	0	0	0	0	0	0	0	6.37229e-06	0	0	0	0	2.91497e-06	0	4.62298e-05	0	0	2.20744e-05	0	0	0	0	1.82526e-05	1.50352e-05
Neutral alpha-glucosidase AB	GANAB	Q14697	10			4.87584e-05	4.67998e-05	8.21732e-05	0.000177411	4.12425e-05	0.000143392	5.93824e-05	0.000156388	0	0	7.80732e-05	0	0.000123391	0.00011755	0	2.77073e-05	0	5.06819e-05	4.36137e-05	0	0	0	9.07673e-05	5.44682e-05	0	0.000163304	0	0	0.000103678	0.000138643	4.52611e-05	5.62577e-05	0.000293664	0.000119295	6.13738e-06
Neuromodulin	GAP43	P17677	3			0	0	0	0	0	0	0	0	0	0	0	0	0	0	0	0	0	0	0	0	0	1.58356e-05	0	0	0	0	0	0	0	0	0	0	0	0	0
Glyceraldehyde-3-phosphate dehydrogenase	GAPDH	P04406	31			0.00168298	0.00582203	0.00520818	0.00389162	0.00600602	0.00635214	0.00229186	0.00424983	0.00228769	0	0.00318984	0.00385038	0.00214997	0.0040725	0.000114971	0.00275518	0.00125888	0.00330257	0.00426009	0.000205001	0.00402991	0.00284524	0.00342487	0.00322073	0.000768293	0.00585871	0.0026637	0.00407692	0.00247733	0.00292658	0.00254108	0.00270335	0.00402389	0.00384354	0.00357094
Glycine--tRNA ligase	GARS	P41250	6			0	3.50234e-05	0	0	0	2.34948e-05	0	1.52119e-05	0	0	0	0	0	0	0	0	0	0	0	0	0	0	0	0	0	0	0	0	0	0	1.42003e-05	0	0	3.26647e-05	0
Trifunctional purine biosynthetic protein adenosine-3;Phosphoribosylamine--glycine ligase;Phosphoribosylformylglycinamidine cyclo-ligase;Phosphoribosylglycinamide formyltransferase	GART	P22102	4			0	5.30534e-05	0	0	0	0	0	2.0637e-05	0	0	0	0	0	1.38943e-05	0	0	0	0	0	0	0	0	1.58309e-05	0	0	0	0	0	0	1.25926e-05	0	0	1.71892e-05	2.21755e-05	0
Transcriptional repressor p66-beta;Transcriptional repressor p66-alpha	GATAD2B;GATAD2A	Q8WXI9;Q86YP4	1			3.36023e-05	0	0	1.32695e-05	0	0	0	2.45478e-05	4.66115e-05	0	0	0	0	0	0	0	0	0	0	0	0	0	0	0	0	0	2.79942e-05	0	0	1.61991e-05	0	0	0	0	0
Protein NipSnap homolog 2	GBAS	O75323	3			0	0	0	0	0	2.66797e-05	0	0	0	0	1.41476e-05	0	0	0	0	0	0	1.84816e-05	3.89584e-05	0	0	0	2.32632e-05	0	0	5.24107e-05	0	0	0	0	2.68322e-05	0	0	0	0
Interferon-induced guanylate-binding protein 1	GBP1	P32455	1			0	0	0	0	0	0	0	0	0	0	0	0	0	0	0	0	0	0	0	0	0	0	0	0	0	0	0	0	0	0	0	0	0	0	0
Vitamin D-binding protein	GC	P02774	22			0	0.000247361	0	0	0	0	0	0	0	0	0.000230785	0	0	0	0	0	0	0	0.000378123	0	0.000488922	0.000508722	0.000296732	0.00169416	0	0	0	0.00052385	4.89522e-05	0	0.000349479	0	0	0.000187021	0.00119696
GRIP and coiled-coil domain-containing protein 2	GCC2	Q8IWJ2	6			0	0	0	0	0	0	0	0	0	0	0	0	0	0	0	0	0	0	0	0	7.92774e-07	0	1.4183e-05	1.39839e-06	0	0	0	0	0	1.16798e-05	0	0	0	0	5.50232e-06
Glutaryl-CoA dehydrogenase, mitochondrial	GCDH	Q92947	1			0	0	0	2.26778e-05	0	0	3.22144e-05	0	0	0	0	0	0	1.32068e-05	0	4.76589e-05	0	0	0	0	0	0	0	0	0	0	0	0	0	1.20862e-05	0	0	0	0	0
Glucagon;Glicentin;Glicentin-related polypeptide;Oxyntomodulin;Glucagon;Glucagon-like peptide 1;Glucagon-like peptide 1(7-37);Glucagon-like peptide 1(7-36);Glucagon-like peptide 2	GCG	P01275	6	Glucagon; Somatostatin signaling		0	1.64591e-05	0	4.19254e-05	0	1.95239e-05	2.44944e-05	0.000170926	0	0	0	0	4.5426e-05	0	0	0	0	0	0	0	7.62968e-05	0	0	1.82217e-05	0	0	0	0	2.99836e-05	0	0	0	0	0	0
Glycine cleavage system H protein, mitochondrial	GCSH	P23434	1			0	0	0	0	0	0	0	0	0	0	0	0	0	0	0	0	0	0	0	0	0	0	0	7.11879e-06	0	0	0	0	0	0	0	0	0	0	0
Rab GDP dissociation inhibitor alpha	GDI1	P31150	10			0	1.80023e-05	0	0	0	6.20887e-06	0	9.37199e-06	0	0	4.56873e-06	0	0	0	0	0	0	6.62168e-06	0	0	7.22131e-06	0	3.37035e-06	5.24542e-06	0	0	0	0	0	8.16629e-06	0	0	0	9.88059e-06	0
Rab GDP dissociation inhibitor beta	GDI2	P50395	18			5.13041e-05	0.000207732	0	0.000103541	0.000179029	0.000239859	7.62053e-05	0.000219427	3.74051e-05	0	0.00019062	8.77104e-05	3.24904e-05	5.79439e-05	0	0	7.7095e-05	0.000123312	9.74389e-05	0	0.00019214	3.51406e-05	0.000319076	0.000258471	0	8.00441e-05	0	0	5.03528e-05	0.00018155	5.17684e-05	0	0.00030517	0.000539949	0.000171497
FAD-linked sulfhydryl oxidase ALR	GFER	P55789	1			0	0	0	0	0	0	0	0	0	0	1.27667e-05	0	0	0	0	0	0	0	0	0	0	0	2.02151e-05	0	0	0	0	0	0	0	0	0	0	0	0
Elongation factor G, mitochondrial	GFM1	Q96RP9	2			0	0	0	0	0	0	0	0	0	0	0	0	0	0	0	0	0	0	0	0	0	0	0	0	0	0	3.00564e-05	0	0	0	0	0	0	4.07626e-06	0
Glutamine--fructose-6-phosphate aminotransferase [isomerizing] 1	GFPT1	Q06210	15			0	2.72635e-05	0	1.68312e-05	3.28094e-05	5.27403e-05	0	1.82522e-05	0	0	1.7443e-05	0	0	2.26903e-05	0	3.89366e-05	0	8.55946e-05	8.92421e-05	0	4.081e-05	0	6.65005e-05	0	0	0.000183324	0	0	2.02113e-05	0.000110393	3.43424e-05	0	3.0294e-05	0.000241031	4.58265e-05
Gamma-glutamylaminecyclotransferase	GGACT	Q9BVM4	2			0	0	0	0	0	0	0	0	0	0	0	0	0	0	0	0	0	8.27968e-05	0	0	0	0	0	0	0	0	0	0	0	0	0	0	0	0	0
Gamma-glutamylcyclotransferase	GGCT	O75223	3			0	0	0	0	0	0	0	0	0	0	1.97492e-05	0	0	0	0	0	0	0	0	0	6.72875e-05	0.000153111	1.1802e-05	0	0	2.85327e-05	0	0	0	0	1.89683e-05	0	0	5.72347e-05	1.94235e-05
PDZ domain-containing protein GIPC1	GIPC1	O14908	6			0	1.1265e-05	0	0	0	0	0	0	0	0	0	0	0	0	0	0	0	1.19252e-05	1.16378e-05	0	0	0	1.15672e-05	0	0	0	0	0	0	0	0	0	8.12437e-05	0	0
PDZ domain-containing protein GIPC2	GIPC2	Q8TF65	1			0	0	0	0	0	0	0	0	0	0	0	0	0	0	0	0	0	0	0	0	1.279e-05	0	0	0	0	2.06686e-05	0	0	0	0	0	0	0	1.58372e-05	0
Beta-galactosidase	GLB1	P16278	1			0	0	0	0	0	0	0	1.24555e-05	0	0	0	0	9.37312e-06	0	0	0	0	0	0	0	0	0	0	0	0	0	0	0	0	0	0	0	0	0	0
Golgi apparatus protein 1	GLG1	Q92896	9			0	0	0	0	0	0	0	0	0	0	3.30147e-05	0	0	2.70574e-05	0	0	0	0	2.74738e-05	0	0	0	5.1581e-05	0	0	0.000211515	0	0	3.2285e-05	1.2132e-05	2.71295e-05	0	0	4.25422e-05	0
Golgi-associated plant pathogenesis-related protein 1	GLIPR2	Q9H4G4	3			0	1.34669e-05	0	3.97824e-05	0	0	4.11155e-05	6.14018e-05	0	0	8.05657e-06	0	0	7.65144e-05	0	1.9564e-05	4.4397e-05	0	1.9772e-05	0	2.22034e-05	0	1.44769e-05	1.51599e-05	0	0	0	0	1.39096e-05	0	8.39134e-06	0	0	0	0
Lactoylglutathione lyase	GLO1	Q04760	4	Methylglyoxal detoxification	Methylglyoxal detoxification	0	0	0	0	0	0	0	0	0	0	2.01238e-05	0	0	0	0	0	0	0	0.000126936	0	8.74896e-05	5.63304e-06	1.70128e-05	1.25411e-05	0	6.41611e-05	0	0	4.98531e-06	4.03225e-05	8.5941e-05	0	1.6941e-05	0.000148878	8.60942e-05
Glyoxalase domain-containing protein 4	GLOD4	Q9HC38	11			0	5.05001e-05	0	7.1927e-05	2.42538e-05	5.72972e-05	0	8.62919e-05	0	0	3.43485e-05	0	0	0	0	1.84304e-05	0	0	4.35642e-05	0	0.000124108	1.49875e-05	0.00012067	3.66741e-05	0	1.12671e-05	0	0	1.67779e-05	0	7.06932e-06	0	5.01108e-05	0.000169079	5.65631e-05
Glutaredoxin-1	GLRX	P35754	4			0	0	0	0	0	0	0	0	0	0	0	0	0	2.31654e-05	0	0	0	0	0	0	0	0	4.39938e-05	1.28269e-05	0	0	0	0	0	0	0	0	0	0	0
Glutaredoxin-related protein 5, mitochondrial	GLRX5	Q86SX6	2			0	0	0	0	0	1.44801e-05	0	0	0	0	0	0	0	0	0	0	0	0	0	0	0	0	0	0	0	0	0	0	0	0	0	0	0	0	0
Glutaminase kidney isoform, mitochondrial	GLS	O94925	2			0	0	0	0	0	0	0	0	0	0	1.89886e-05	0	0	0	0	0	0	0	0	0	0	0	0	0	0	3.23283e-05	0	0	0	0	0	0	0	0	0
Glycolipid transfer protein	GLTP	Q9NZD2	2			0	0	0	0	0	0	0	0	0	0	0	0	0	0	0	0	0	0	0	0	1.83576e-06	0	2.40011e-06	0	0	0	0	0	0	0	0	0	0	2.11931e-06	0
Glutamate dehydrogenase 1, mitochondrial;Glutamate dehydrogenase 2, mitochondrial	GLUD1;GLUD2	P00367;P49448	32			0	5.19823e-05	0	0.000632195	9.37052e-05	0.00087305	0.000176358	0.000265329	7.11697e-05	0	0.000641139	0	0.000126369	0.000330711	0	0.000754603	0.000140893	0.00038587	4.53833e-05	0.000123885	0.000277878	0	0.00041102	0.000432224	8.2645e-05	0.000638532	0.000224896	0	0.000612377	0.000627927	0.00014705	0.000193561	0.000288804	0.000263563	0.000164924
GDP-mannose 4,6 dehydratase	GMDS	O60547	9			0	0.000138864	0	0	0	4.15572e-05	0	2.36481e-05	0	0	7.07782e-06	0	0	0	0	0	0	0.000470045	3.53567e-05	0	0.000127828	0	3.46865e-05	7.72721e-05	0	0.000139649	0	0	0	0	1.06449e-05	0	0	7.41583e-05	4.03479e-05
Glia maturation factor beta	GMFB	P60983	5			0	1.18863e-05	0	0	0	2.88222e-05	0	1.32059e-05	0	0	3.62838e-06	0	0	1.41982e-05	0	0	0	2.71895e-06	0.000123777	0	3.55936e-05	2.81312e-05	0	2.21431e-05	0	0	0	4.81661e-05	3.35927e-06	7.43725e-05	0	0	0	3.3131e-05	3.48481e-05
Glia maturation factor gamma	GMFG	O60234	5			0	0	0	0	0	0	0	0	0	0	1.18113e-05	0	0	0	0	0	0	5.46663e-06	0	0	0	1.4642e-05	1.84722e-05	5.69295e-06	0	0	0	0	0	1.11581e-05	0	0	0	0	8.4893e-06
Mannose-1-phosphate guanyltransferase alpha	GMPPA	Q96IJ6	2			0	0	0	0	0	0	0	0	0	0	0	0	0	0	0	0	0	0	0	0	0	0	0	0	0	0	0	0	0	0	0	0	0	1.20755e-05	0
Mannose-1-phosphate guanyltransferase beta	GMPPB	Q9Y5P6	3			0	0	0	0	0	0	0	0	0	0	0	0	0	0	0	0	0	0	0	0	0	0	0	0	0	0	0	0	0	0	0	0	2.49693e-05	4.10945e-06	0
GMP reductase 2	GMPR2	Q9P2T1	3			0	0	0	0	0	0	0	0	0	0	0	0	0	0	0	0	0	0	0	0	0	0	0	0	0	0	0	0	0	0	0	0	0	0	0
Guanine nucleotide-binding protein subunit alpha-11;Guanine nucleotide-binding protein subunit alpha-14	GNA11;GNA14	P29992;O95837	4			0	0	0	0	0	8.35612e-06	0	7.64905e-06	0	0	2.90924e-05	0	0	0	0	0	0	4.51195e-06	0	0	0	0	2.34359e-05	9.72743e-06	0	3.48118e-05	5.23805e-05	0	3.28181e-05	0	1.25388e-05	0	0	1.86186e-05	0
Guanine nucleotide-binding protein G(q) subunit alpha	GNAQ	P50148	3			0	0	0	0	0	0	0	0	0	0	0	0	0	0	0	0	0	0	0	0	0	0	0	0	0	0	0	0	0	0	0	0	0	0	0
Guanine nucleotide-binding protein G(s) subunit alpha isoforms short;Guanine nucleotide-binding protein G(s) subunit alpha isoforms XLas	GNAS	P63092;Q5JWF2	2			0	0	0	7.28572e-05	0	0	0	0	0	0	0	0	4.39109e-05	0	0	0.000112182	0.000140813	0.000179945	2.51881e-05	0	0	6.32811e-05	0.00010598	7.21752e-05	0	0.000122313	0	0	6.94533e-05	0	4.55351e-05	0	1.30298e-05	7.89576e-05	4.09391e-05
Guanine nucleotide-binding protein G(I)/G(S)/G(T) subunit beta-1	GNB1	P62873	10			0	0	0	0	0	5.20776e-05	0	0	0	0	0.000198235	0	0	0.000118211	0	2.10262e-05	0	1.81704e-05	0	8.49865e-05	6.49263e-05	7.91024e-06	0.000256284	4.33293e-05	0	8.45247e-05	0	0	0.000148922	7.14128e-05	0	3.51367e-05	1.16648e-05	6.844e-05	3.80092e-05
Guanine nucleotide-binding protein G(I)/G(S)/G(T) subunit beta-2;Guanine nucleotide-binding protein subunit beta-4	GNB2;GNB4	P62879;Q9HAV0	10			0	0	0	0	0	6.58974e-05	0	3.19789e-05	0	0	2.31434e-05	0	0	0	0	0	0	1.49e-05	0	0	2.67265e-05	0	2.94612e-06	2.72729e-05	0	5.28882e-05	0	0	3.15271e-05	0	0	2.29946e-05	2.71172e-05	1.57133e-05	1.42717e-05
Guanine nucleotide-binding protein subunit beta-2-like 1;Guanine nucleotide-binding protein subunit beta-2-like 1, N-terminally processed	GNB2L1	P63244	11			2.30998e-05	0.000137197	0	3.5072e-05	5.19092e-05	0	0.000163233	3.93286e-05	4.36699e-05	0	0.000139894	0	1.3387e-05	0	0	3.64575e-05	3.47379e-05	0	5.87816e-05	0	0	0	2.39777e-05	7.98909e-05	0	9.87431e-05	2.98792e-05	0	4.22411e-05	0	3.69152e-05	0	0.000164867	6.47224e-05	2.69423e-05
Bifunctional UDP-N-acetylglucosamine 2-epimerase/N-acetylmannosamine kinase;UDP-N-acetylglucosamine 2-epimerase (hydrolyzing);N-acetylmannosamine kinase	GNE	Q9Y223	2			0	0	0	0	0	0	0	0	0	0	0	0	0	0	0	0	0	0	0	0	0	0	0	0	0	1.8057e-05	0	0	0	0	0	0	0	0	0
Guanine nucleotide-binding protein G(I)/G(S)/G(O) subunit gamma-12	GNG12	Q9UBI6	5			0	0	5.00631e-05	5.0486e-05	4.90462e-05	5.95476e-05	2.84341e-05	4.92198e-05	0	0	4.65834e-05	9.39578e-05	4.7088e-05	4.56583e-05	0.00037702	0	8.99139e-05	8.10991e-05	0	0.000417521	2.50145e-06	0	1.68256e-06	4.58609e-05	6.02953e-05	9.13661e-05	9.45512e-05	0	0.000131475	0.000113172	7.77266e-05	5.50985e-05	0.000124794	5.90987e-07	0
Glucosamine 6-phosphate N-acetyltransferase	GNPNAT1	Q96EK6	1			0	0	0	0	0	0	0	0	0	0	0	0	0	0	0	0	0	0	0	0	3.51991e-06	0	0	0	0	0	0	0	0	0	0	0	0	0	0
N-acetylglucosamine-6-sulfatase	GNS	P15586	2			0	1.25697e-05	0	0	0	8.64384e-06	0	1.66532e-05	0	0	0	0	0	0	0	0	0	1.75678e-05	0	0	0	0	0	1.09367e-05	0	0	0	0	0	5.79814e-06	0	0	1.76023e-05	1.03075e-05	0
Golgin subfamily A member 1	GOLGA1	Q92805	2			0	0	0	0	0	0	0	0	0	0	0	0	0	0	0	0	0	0	0	0	0	0	0	0	0	0	0	0	0	9.20392e-06	0	0	0	0	0
Golgin subfamily A member 2	GOLGA2	Q08379	11			6.78263e-05	5.12239e-05	7.11472e-05	9.76125e-05	8.80229e-05	7.22059e-05	1.98922e-05	0.000104035	7.37204e-05	0	7.58367e-06	8.97948e-05	0	1.74828e-05	0	6.06249e-05	0.000294384	3.24272e-05	0	0.000254492	1.12668e-05	0	0	0	7.35011e-05	1.80822e-05	0.000137691	0	1.33336e-05	0.000146142	0	3.53434e-05	0.000120927	0	1.96559e-06
Golgin subfamily A member 3	GOLGA3	Q08378	15			0	0	0	0	0	1.85741e-05	0	5.48589e-05	0	0	1.17689e-06	0	0	0	0	3.19745e-05	0	0	0	0	0	0	0	2.96138e-06	0	0	1.82074e-05	0	0	8.395e-06	0	6.34422e-05	5.51968e-05	7.28613e-06	0
Golgin subfamily A member 4	GOLGA4	Q13439	3			0	0	0	0	0	6.58443e-06	0	9.34037e-06	0	0	0	0	0	0	0	2.30324e-05	0	0	0	0	0	0	0	0	0	0	0	0	0	0	0	0	2.25288e-05	0	0
Golgin subfamily A member 5	GOLGA5	Q8TBA6	2			3.56019e-05	0	0	1.79196e-05	0	0	0	0	0	0	0	0	2.09288e-05	0	0	4.27358e-05	0	0	0	0	0	0	0	0	0	0	0	0	0	0	0	0	0	0	0
Golgin subfamily B member 1	GOLGB1	Q14789	24			3.62862e-05	0	0	0.000195251	0.000182649	1.07651e-05	7.05294e-05	7.53738e-05	6.91697e-05	0	1.10347e-05	0	0.000231164	0	0.000211685	0.000190223	0	0.000102836	0	0.000187791	4.0561e-06	0	0	2.26424e-05	0.000151882	0.000107992	0.000121561	0	2.32762e-05	7.9149e-05	7.88938e-06	4.52497e-05	8.88473e-05	1.26231e-05	0
Golgi integral membrane protein 4	GOLIM4	O00461	11			0	3.85769e-05	0	0.000165461	7.06091e-05	2.70075e-05	2.08705e-05	8.09722e-05	0	0	4.63151e-06	0	6.09632e-05	7.82891e-05	0	6.22678e-05	0.00016024	4.47063e-05	9.21428e-06	0	2.35266e-05	0	0	0	0.000110647	0.000191055	9.88095e-05	0	8.55875e-05	5.30696e-05	9.57061e-05	1.71393e-05	5.01837e-05	7.19844e-05	2.34472e-05
Golgi membrane protein 1	GOLM1	Q8NBJ4	18			8.20725e-05	6.21262e-05	0	0.000221528	0.0001222	5.25811e-05	6.70669e-05	0.000117322	0	0	0.000142492	7.65494e-05	8.86914e-05	0.000100567	0.000371594	0.0002961	7.11082e-05	0.000102408	0.000150806	0.000497748	0.000177888	0	5.6268e-05	5.99533e-05	0	0.000449891	2.41428e-05	0	0.000250352	7.96386e-05	3.13285e-05	8.90571e-05	0.000144804	0.000127397	9.15209e-05
Golgi phosphoprotein 3	GOLPH3	Q9H4A6	1			0	0	0	0	0	0	0	0	0	0	5.13849e-06	0	0	0	0	0	0	0	0	0	0	0	9.21578e-06	0	0	3.5171e-06	0	0	4.89021e-06	5.69609e-06	0	0	0	7.91361e-06	0
Golgi phosphoprotein 3-like	GOLPH3L	Q9H4A5	2			0	0	0	0	0	0	0	0	0	0	0	0	0	0	0	0	0	0	0	0	0	0	0	0	0	1.088e-05	0	0	0	2.03854e-05	0	0	0	1.80273e-05	0
Golgi-associated PDZ and coiled-coil motif-containing protein	GOPC	Q9HD26	2			0	0	0	0	0	0	0	0	0	0	0	0	0	0	0	0	0	0	1.75728e-05	0	0	0	1.11391e-05	0	0	2.28672e-05	0	0	0	0	2.1163e-05	0	0	0	0
Golgi reassembly-stacking protein 2	GORASP2	Q9H8Y8	4			0	0	0	0	0	0	0	0	0	0	6.98577e-06	0	0	0	0	0	0	0	0	0	2.22902e-05	0	8.40558e-06	1.38055e-05	0	0	0	0	4.65449e-05	0	0	0	0	0	0
Aspartate aminotransferase, cytoplasmic	GOT1	P17174	13			0.000102765	0.000149982	0	0	6.81416e-05	3.88079e-05	0	3.78601e-05	0	0	2.69829e-05	0	6.52125e-05	0	0	0	0	7.53442e-06	1.58108e-05	0	5.05239e-05	0	7.49763e-06	1.2794e-05	0	0	0	0	0	9.49757e-05	0	0	5.53045e-05	9.12604e-05	3.09365e-05
Aspartate aminotransferase, mitochondrial	GOT2	P00505	15			0.000218067	0.000119915	0.000120396	0.000261435	0.000441816	0.00012291	0.000253858	0.000417698	0.000212048	0	0.000384036	0.000102576	0.000141318	0.000553883	0.00026799	0.00052348	0.000271748	0.000328404	3.08583e-05	0	0.000164752	0	0.000161393	0.00049557	0.000277225	0.00026482	0.000450194	0	0.000244445	0.000690445	0	0.000131314	0.000117514	0.000272794	0.000101966
Pancreatic secretory granule membrane major glycoprotein GP2	GP2	P55259	1			0	0	0	0	0	0	0	0	0	0	0	0	0	1.14467e-05	0	0	0	0	0	0	0	0	0	0	0	0	0	0	0	0	0	0	0	0	0
Cell surface A33 antigen	GPA33	Q99795	16			0	2.78975e-05	0	0.000274293	8.95176e-05	0.000252264	0	7.78964e-05	0	0	0.000868488	0	0	6.80883e-05	0	0.00019231	0.000208893	0.000140413	0.000406614	0	0.000620429	2.12649e-05	0.000334895	0.000453236	0	0.000633266	0.000323812	0	0.00143851	0.000186524	0.00040932	5.92771e-05	7.17859e-06	0.000472974	0.00011985
Glycerol-3-phosphate dehydrogenase 1-like protein	GPD1L	Q8N335	3			0	0	0	0	0	0	0	0	0	0	0	0	0	0	0	0	0	0	0	0	0	0	8.3333e-05	0	0	7.83594e-05	0	0	0	0	0	0	0	3.28417e-05	4.15727e-05
Glycerol-3-phosphate dehydrogenase, mitochondrial	GPD2	P43304	15			0	2.03897e-05	0.0001202	9.4656e-05	2.23372e-05	9.99574e-05	2.32823e-05	0	0	0	1.20184e-05	0.000214211	6.89048e-05	6.26126e-05	0	7.07179e-05	0	9.35875e-06	0	0	1.27306e-05	0	3.93144e-05	9.76907e-06	0	0.000131482	0	0	2.48346e-05	2.01445e-05	0	0	4.65388e-05	0	3.03972e-05
Gephyrin;Molybdopterin adenylyltransferase;Molybdopterin molybdenumtransferase	GPHN	Q9NQX3	1			0	0	0	0	0	0	0	1.33833e-05	0	0	0	0	0	0	0	0	0	0	0	0	0	0	0	0	0	0	0	0	0	0	0	0	3.8877e-05	0	0
Glucose-6-phosphate isomerase	GPI	P06744	15			0	0.000387773	0	0	0	0.000182959	0.000172246	6.3796e-05	0	0	0.000367121	0	0.000107458	0	0	9.05799e-05	0	0.000167871	0.000356921	0	0.000368485	6.7796e-05	0.000720439	0.000431577	0	0.000417514	9.43729e-05	0.000163737	6.51235e-05	5.49457e-05	8.84042e-05	6.2211e-05	0.000323109	0.00075303	0.000195132
Alanine aminotransferase 1	GPT	P24298	4			0	1.94586e-05	0	0	0	0	0	0	0	0	0	0	0	2.12993e-05	0	0	0	0	0	0	0	0	0	0	0	0	0	0	0	0	0	0	2.04918e-05	0	0
Glutathione peroxidase 1	GPX1	P07203	2			0	0	0	0	0	1.60672e-05	0	2.46688e-05	0	0	7.2883e-06	0	0	2.5528e-05	0	0	0	2.26774e-05	0	0	0	0	4.67315e-06	0	0	0	0	0	0	0	0	0	2.03027e-05	0	0
Growth factor receptor-bound protein 2	GRB2	P62993	5			0.000127169	0	9.60155e-05	0	0	7.61325e-06	0	0	0.000122341	0	2.03111e-05	0	0	0	0	0	0	0	0	0	1.71894e-05	0	2.48251e-05	1.39152e-05	0	0	0	0	0	0	0	0	1.79182e-05	1.07811e-05	0
Glyoxylate reductase/hydroxypyruvate reductase	GRHPR	Q9UBQ7	8			0	0.000187814	0	0.000134145	0	2.25974e-05	0	0	0	0	0	0	0	0	0	3.63292e-05	0	1.00024e-05	0	0	1.28085e-05	0	0	0	0	0	0	0	0	0	0	0	0.000141138	8.93806e-06	0
GRIP1-associated protein 1	GRIPAP1	Q4V328	5			0	0	0	0	0	0	0	0	0	0	0	0	3.99837e-05	0	0	1.63811e-05	0	2.45145e-05	0	0	1.37164e-05	0	0	0	0	0	0	0	0	5.7408e-05	0	0	0	0	0
Granulins;Acrogranin;Paragranulin;Granulin-1;Granulin-2;Granulin-3;Granulin-4;Granulin-5;Granulin-6;Granulin-7	GRN	P28799	2			0	0	0	0	0	1.27827e-05	0	0	0	0	1.01603e-05	0	0	1.91411e-05	0	0	0	0	0	0	0	0	3.53074e-05	0	0	0	0	0	0	3.17384e-05	0	0	0	0	0
GrpE protein homolog 1, mitochondrial	GRPEL1	Q9HAV7	9			0	2.33092e-05	0.000115722	0.000130446	0	1.09668e-05	1.85677e-05	0.000105706	0	0	3.44502e-05	0	0.000119905	0	0	3.27418e-05	0.000192229	3.50397e-05	1.91994e-05	0	2.24629e-05	0	2.21928e-05	2.70119e-05	0	6.99159e-05	0.00018835	0	6.79878e-05	3.46659e-05	0	4.04911e-05	0.00013408	2.74574e-05	2.65918e-05
G-rich sequence factor 1	GRSF1	Q12849	1			0	0	0	6.43757e-05	0	0	0	0	0	0	0	0	0	0	0	4.66154e-05	0	3.52469e-05	0	0	0	0	0	0	0	0	0	0	0	0	0	0	5.12117e-05	0	0
Gelsolin	GSN	P06396;CON__Q3SX14	54	Bacterial adhesion; actin remodelling	Bacterial adhesion; actin remodelling	0.000299902	0.00258452	0.000683191	0.00179923	0.00158303	0.00110104	0.000773195	0.000416039	0.000353186	0.00106866	0.00196174	0.0004433	0.0012101	0.00039163	0	0.00183904	0.000246998	0.000755555	0.0028149	0	0.0030157	0.00400643	0.0016045	0.00260389	0.0014909	0.00262834	0.000505429	0.00361857	0.000835517	0.00222164	0.00398086	0.00109564	0.00148142	0.00552971	0.00319241
Eukaryotic peptide chain release factor GTP-binding subunit ERF3A;Eukaryotic peptide chain release factor GTP-binding subunit ERF3B	GSPT1;GSPT2	P15170;Q8IYD1	5			0	2.89098e-05	0	0	0	4.50298e-05	0	0	0	0	1.00577e-05	0	0	4.76217e-05	0	0	0	0	0	0	0	0	4.17973e-06	0	0	0	0	0	0	0	0	0	0	2.12503e-05	0
Glutathione reductase, mitochondrial	GSR	P00390	17			0.000220856	0.0006976	0.000189806	0.000419555	0.000338666	0.000329923	0.000134798	0.000456044	0.00028785	0	0.000481572	0.000217604	0.000439005	0.000409115	0	0.000476944	8.00131e-05	0.000247591	0.000475207	0	0.000640932	3.62632e-05	0.000518666	0.000208394	0.000504244	0.000464261	0.000421429	0	0.000347406	0.000456195	0.000234224	0.000475547	0.000363087	0.000198562	0.000323135
Glutathione synthetase	GSS	P48637	10			8.97425e-05	5.61957e-05	0.000182257	6.41121e-05	9.8421e-05	3.60116e-05	3.65793e-05	4.36944e-05	5.03111e-05	0	1.49279e-05	8.83149e-05	5.95663e-05	4.10699e-05	0	4.73125e-05	0.000122536	3.49835e-05	4.90861e-05	0	9.57967e-05	3.73063e-05	2.11169e-05	1.46319e-05	4.08148e-05	0	5.63997e-05	0	0	8.67409e-05	3.44136e-05	5.80909e-05	4.35468e-06	8.73537e-05	3.15064e-05
Glutathione S-transferase kappa 1	GSTK1	Q9Y2Q3	7			0	3.18621e-05	0	0	0	0.000184214	0	7.02701e-05	0	0	3.85806e-05	0	0	7.07741e-05	0	0	0	4.92122e-05	0	0	6.58358e-05	0	0.000103825	0.000103029	0	0.000188442	0	0	3.78203e-05	0.000103516	5.95855e-05	0	4.24892e-05	0.00010862	7.25186e-05
Glutathione S-transferase Mu 4;Glutathione S-transferase Mu 5;Glutathione S-transferase Mu 1	GSTM4;GSTM5;GSTM1	Q03013;P46439;P09488	1			0	0	0	0	0	0	0	0	0	0	0	0	0	0	0	0	0	0	0	0	0	0	1.84254e-05	0	0	0	0	0	0	0	0	0	0	0	0
Glutathione S-transferase omega-1	GSTO1	P78417	9			5.87759e-05	0.000129235	0	3.38168e-05	0.000160526	0	5.79884e-05	0.000121622	7.58555e-05	0	2.24431e-05	0	0	0	0	2.59191e-05	0	7.19791e-05	0	0	6.32456e-05	0	5.81273e-05	5.30309e-05	0	9.2011e-06	0	0	0	3.86616e-05	0	0	0.000227105	7.45941e-05	4.35775e-05
Glutathione S-transferase P	GSTP1	P09211	9			0	0	0	0	0	2.28557e-05	0	4.12188e-05	0	0	9.36882e-05	0	0	0	0	0	0	2.21174e-05	6.95157e-05	0	0.000224589	3.68279e-05	6.38957e-05	0.000304605	0	8.27285e-05	0	0	0	5.07413e-05	1.63155e-05	0	9.48472e-05	0.000529289	2.17433e-05
General transcription factor IIF subunit 1	GTF2F1	P35269	3			0	0	0	0	0	0	0	2.59265e-05	0	0	0	0	0	0	0	0	0	0	0	0	0	0	0	0	0	0	0	0	0	0	0	0	0	0	0
General transcription factor IIF subunit 2	GTF2F2	P13984	2			0	0	0	0	0	0	0	0	0	0	0	0	0	0	0	0	0	0	0	0	0	0	0	0	0	0	0	0	0	0	0	0	2.09493e-05	0	0
Guanylin;HMW-guanylin;Guanylin	GUCA2A	Q02747	4	Guanylin; cGMP signaling	Guanylin; cGMP signaling	0	0	0	0	8.92728e-05	3.24157e-05	0	2.54464e-05	0	0	2.01351e-05	0	0	0	0	0	0	3.12687e-05	8.41976e-05	0	2.80569e-05	0	3.44628e-05	0	0	5.45885e-05	0	0	0.00013222	3.58642e-05	5.91115e-05	4.50655e-05	3.71201e-05	5.89464e-05	2.10023e-05
Guanylate kinase	GUK1	Q16774	1			0	0	0	0	0	0	0	0	0	0	0	0	0	0	0	0	0	0	0	0	0	0	0	0	0	0	0	0	0	0	0	0	0	0	0
Beta-glucuronidase	GUSB	P08236	3			0	0	0	0	0	1.51487e-05	0	0	0	0	0	0	0	0	0	0	0	0	0	0	0	0	0	0	0	0	0	0	0	2.9423e-05	0	0	2.32535e-05	0	0
Glycogenin-1	GYG1	P46976	3			0	0	0	0	0	0	0	0	0	0	0	0	0	0	0	0	0	0	0	0	5.9493e-06	0	0	0	0	0	0	0	0	0	0	0	0	0	0
Glycophorin-C	GYPC	P04921	1			0	0	0	0	0	0	0	0	0	0	1.82045e-05	0	0	0	0	0	0	0	0	0	0	0	0	0	0	0	0	0	0	0	0	0	0	0	0
Glycogen [starch] synthase, muscle	GYS1	P13807	1			0	0	0	0	0	1.58167e-05	0	0	0	0	0	0	0	0	0	0	0	0	0	0	0	0	0	0	0	0	0	0	0	0	0	0	0	0	0
Granzyme A	GZMA	P12544	4			0	0	0	0	0	0	0	0	0	0	0	0	0	0	0	0	0	0	0	0	0	0	0	0	0	0	0	0	0	0	0	0	0	0	0
Histone H1.0;Histone H1.0, N-terminally processed	H1F0	P07305	20			0.0050217	0.001542	0.00397589	0.00544179	0.00650428	0.00297072	0.00294174	0.0042084	0.00526074	0.00930388	0.00174289	0.00481439	0.00645882	0.00280792	0.00633619	0.00347489	0.00613376	0.00215345	0.00281619	0.0115878	0.00146073	0.000539073	0.00159245	0.000872606	0.018876	0.00188552	0.00977561	0.000142893	0.00375788	0.0020138	0.00133191	0.00583335	0.00207644	0.00078506	0.00130481
Histone H1x	H1FX	Q92522	8			0	0	0	5.28399e-05	0	3.99158e-05	7.91033e-05	0.000139428	0	0.00057706	1.62014e-05	0	5.0659e-05	3.6948e-05	0	0	4.84019e-05	6.0567e-05	1.94489e-05	0	2.38014e-05	0	8.44275e-06	1.24978e-05	0	0	0	0	6.43007e-05	2.73408e-05	0	7.48411e-05	4.03424e-05	0	0
Histone H2A.V;Histone H2A.Z	H2AFV;H2AFZ	Q71UI9;P0C0S5	6			7.16822e-05	7.33049e-05	0	0.000132548	6.58739e-05	0.000212438	0.000210604	0.000225877	0	0	0.000344323	0	0.000138645	0.000167404	0	0.000192425	8.75441e-05	9.66226e-05	0	0	0.000258364	0	0.00025574	0.000229304	0	0.00010726	0	0	0.000421223	0.000199177	0	0.000301274	0.000519829	0.000150307	0
Histone H2AX	H2AFX	P16104	12			0	0	0	0.000475107	0	1.47902e-05	0	6.43294e-05	0	0	0.00014317	0	7.48924e-05	0	0	0	0.000130533	0	0	0	0	0	0.000275172	0	0	0.000141066	0	0	0.000127336	0	0.00012767	0	0.000106273	0	0
Core histone macro-H2A.1	H2AFY	O75367	19			0	0.000242887	0	2.64727e-05	0.000294625	0.000421509	0.000353676	0.000323797	0.000293987	0	0.00014413	0	0.000353741	0.000513553	0.000461988	0.00068702	0.000250332	0.00026922	2.52827e-05	0	0.000124406	0	0.000264055	0.000124899	0	0.000139914	0.000106312	0	0.000290158	0.000245847	5.17383e-05	0.000156211	0.000299	0.000114769	5.64073e-05
Histone H3.3	H3F3A	P84243	20			0	0	0	0	0	0	0	0	0	0	0	0	2.86674e-05	0	0	0	0	2.02345e-05	0	0	0	0	1.79442e-05	0	0	4.29719e-05	0	0	0	0	0	0	0	0	0
Very-long-chain (3R)-3-hydroxyacyl-CoA dehydratase 2	HACD2	Q6Y1H2	2			0	0	0	0	0	0	0	0	0	0	2.10265e-05	0	0	0	0	0	0	0	0	0	0	0	4.58352e-06	0	0	0.000262522	0	0	5.70528e-05	0	0	0	0	0	0
Hydroxyacyl-coenzyme A dehydrogenase, mitochondrial	HADH	Q16836	20		Butyrate metabolism	0	0.00016739	0	5.29792e-05	0.000152628	0.00086798	0	0.000421153	0	0	0.000450528	9.38759e-05	7.33068e-05	0.000276562	0	0.000238521	0	0.000542646	0.000763298	0	0.000657048	0	0.000914212	0.000474023	7.09454e-05	0.00181817	0	0	0.00108782	0.000232111	0.000481298	0	0.000157112	0.000486726	0.000687864
Trifunctional enzyme subunit alpha, mitochondrial;Long-chain enoyl-CoA hydratase;Long chain 3-hydroxyacyl-CoA dehydrogenase	HADHA	P40939	45			0	0.000401955	0.000150999	0.00093481	0.00074307	0.00130492	0.000629498	0.000578877	0.000298512	5.02554e-05	0.001265	0.000175085	0.000158733	0.000536397	0	0.00122426	0.000302676	0.000461468	0.000591923	0	0.000647247	1.12619e-05	0.00166755	0.000708953	0	0.0021585	0.000747314	0	0.00156783	0.000353772	0.000634817	0.000158331	0.00093479	0.000778339	0.000989712
Trifunctional enzyme subunit beta, mitochondrial;3-ketoacyl-CoA thiolase	HADHB	P55084	31			4.98533e-05	0.000600083	0.000807958	0.00165137	0.000975642	0.001083	0.00100353	0.000666015	0.000735985	0.000234247	0.000497809	0.000302013	0.00100438	0.000898327	0	0.00130637	0.00118533	0.00119294	0.000361136	0.000696761	0.000702014	9.71078e-06	0.000629547	0.000442716	0.000685464	0.00067564	0.00149613	0	0.00109701	0.00106731	0.000337506	0.00110628	0.000761324	0.000303323	0.000352127
Hydroxyacylglutathione hydrolase, mitochondrial	HAGH	Q16775	6			8.16372e-05	7.49961e-05	7.70992e-05	3.38657e-05	9.0645e-05	5.68161e-05	5.93924e-05	4.41787e-05	0.000183236	0	7.57426e-05	0	0	3.05264e-05	0	9.22406e-05	6.23067e-05	0	1.98295e-05	0	3.4513e-05	0	0.000107963	1.82881e-05	6.68744e-05	0	4.9572e-05	0	0	8.89146e-05	0	3.20837e-05	5.96404e-05	5.34698e-05	3.74546e-05
Histidine--tRNA ligase, cytoplasmic	HARS	P12081	3			0	0	0	0	0	0	0	0	0	0	1.11439e-05	0	0	0	0	0	0	0	8.74553e-06	0	1.57947e-05	0	2.18148e-05	0	0	1.33533e-05	0	0	0	0	1.2664e-05	0	0	2.839e-05	0
Hemoglobin subunit alpha	HBA1	P69905	16			0.0119993	0.0806433	0.0357049	0.0316267	0.0580463	0.0290068	0.0772446	0.0301243	0.0183668	0.0378086	0.0613004	0.0101303	0.0278054	0.13901	0.0228188	0.0335264	0.0714808	0.135271	0.00776415	0.0310123	0.0201009	0.0314515	0.0499007	0.0395882	0.0587028	0.00214911	0.0312938	0.0100131	0.0199606	0.0562252	0.014237	0.0373963	0.0521678	0.0276874	0.0313624
Hemoglobin subunit beta;LVV-hemorphin-7;Spinorphin	HBB	P68871	21			0.00941393	0.0968317	0.0160373	0.023935	0.044436	0.0476245	0.075286	0.0213624	0.0101017	0.0121791	0.169582	0.00155753	0.0218726	0.117621	0.00618913	0.0252641	0.0149265	0.14977	0.057771	0.0123766	0.077256	0.117054	0.152589	0.0995303	0.0221558	0.0155228	0.0148381	0.137127	0.0749088	0.0623185	0.124782	0.0268996	0.048824	0.104503	0.127968
Hemoglobin subunit delta	HBD	P02042	17			0	0.00212967	0.000228588	0.000326722	0.000594063	0.000464454	0.00151686	0.000411332	0	0.000136068	0.00596795	0	0.000276432	0.00411003	0	0.000442202	0.000475808	0.00318464	0.000564464	0	0.00142353	0.000769685	0.0066285	0.00248753	0.000258074	0.000149565	0.000228904	0.000426434	0.000822143	0.00224586	0.00155366	0.000511087	0.00104584	0.00346091	0.00305907
Hemoglobin subunit epsilon	HBE1	CON__P02070;P02100	4			0	0.00017313	0	0	8.90151e-05	1.5207e-05	0.000142748	0	0	0	0	0	0	0	0	5.2157e-05	0	0.000529843	0	0	0	0	0.000104259	0	0	0	0	0	0	0	0	0	0	0	0
Hemoglobin subunit gamma-1	HBG1	P69891	12			0	1.42426e-05	0	0	0	0	0	0	0	0	5.82808e-05	0	0	0	0	0	0	0	0	0	0	0	0	3.83055e-05	0	0	0	0	0	0	0	0	0	2.84924e-05	5.73926e-05
Hemoglobin subunit gamma-2	HBG2	P69892	12			0	0.000231002	0	0	0	0	0	0	0	0	0.000469175	0	0	0	0	0.000160143	0	2.32821e-05	0	0	5.54647e-05	0	0.000193113	0.000546201	0	0	0	0	0	0	0	0	1.4175e-05	0.00116685	0.000653031
Cytochrome c-type heme lyase	HCCS	P53701	1			0	0	0	0	0	0	0	0	0	0	0	0	0	0	0	0	0	0	0	0	0	0	0	0	0	2.73166e-05	0	0	0	0	9.87611e-06	0	0	0	0
Host cell factor 1;HCF N-terminal chain 1;HCF N-terminal chain 2;HCF N-terminal chain 3;HCF N-terminal chain 4;HCF N-terminal chain 5;HCF N-terminal chain 6;HCF C-terminal chain 1;HCF C-terminal chain 2;HCF C-terminal chain 3;HCF C-terminal chain 4;HCF C-terminal chain 5;HCF C-terminal chain 6	HCFC1	P51610	2			0	0	0	0	0	4.58293e-06	0	4.12939e-06	0	0	0	0	0	0	0	0	0	0	0	0	0	0	0	5.50477e-06	0	0	0	0	0	0	0	0	7.86584e-06	0	0
Hematopoietic lineage cell-specific protein	HCLS1	P14317	9			0	0	0	0	0	8.33195e-06	7.15737e-05	1.44364e-05	0	0	0	0	0	6.26191e-06	0	0	0	0	0	0	1.30592e-05	1.69016e-05	6.41759e-06	0	0	0	0	0	0	2.06302e-05	0	0	0	0	0
HD domain-containing protein 2	HDDC2	Q7Z4H3	1			0	0	0	0	2.6843e-05	0	0	1.26621e-05	5.91699e-05	0	0	0	0	0	0	0	0	8.06901e-06	0	0	0	0	0	0	0	0	1.28199e-05	0	0	7.28198e-06	0	0	2.25901e-05	0	0
Guanosine-3,5-bis(diphosphate) 3-pyrophosphohydrolase MESH1	HDDC3	Q8N4P3	3			0	6.39314e-06	0	0	0	0	0	1.02728e-05	0	0	0	0	0	0	0	0	0	1.53164e-05	0	0	7.26726e-07	0	9.92135e-07	1.14762e-06	0	0	0	0	0	7.70603e-06	0	0	1.07414e-05	5.74657e-07	0
Hepatoma-derived growth factor	HDGF	P51858	14			0.000210324	0	0	0	0	0.000124242	6.2685e-05	5.60821e-05	0	0	0.00010388	0.000111466	0	6.31853e-05	0	0	0.00017266	0.000128349	0.000363222	0	0.00024755	0.000404068	0.000139145	0.00010137	0	0.000127796	0.000171757	2.15476e-05	0.000139977	0.0001287	0.000317915	0.000175499	4.20032e-05	0.000161297	7.32526e-05
Hepatoma-derived growth factor-related protein 2	HDGFRP2	Q7Z4V5	3			0	0	0	0	0	0	0	0	0	0	0	0	0	0	0	0	0	0	0	0	1.43197e-05	0	1.50958e-05	1.44182e-05	0	0	0	0	0	0	0	2.27228e-05	2.95334e-05	1.89473e-05	0
Haloacid dehalogenase-like hydrolase domain-containing protein 3	HDHD3	Q9BSH5	2			0	0	0	0	0	6.14873e-05	0	2.32734e-05	0	0	0	0	0	2.83179e-05	0	0	0	2.26888e-05	0	0	0	0	0	0	0	0	0	0	0	0	0	0	0	0	0
Vigilin	HDLBP	Q00341	31			0.000113588	0.000231865	0	7.73315e-05	4.43864e-05	6.85033e-05	2.14751e-05	0.000130201	0	0	4.53475e-06	0	2.72161e-05	1.60394e-05	0	0	5.31816e-05	0.000106845	4.47039e-05	0	0.000110957	1.18903e-05	3.89984e-05	1.42213e-05	0	0.000134104	9.32526e-05	0	4.55549e-06	0.000140962	2.4306e-05	2.41624e-05	0.000302687	9.21005e-05	1.5401e-05
Heme-binding protein 2	HEBP2	Q9Y5Z4	6			6.12735e-05	5.92136e-05	0	0	3.90051e-05	0	0	0	9.63993e-05	0	4.66116e-06	0	0	0	0	0	0	0	0	0	8.58829e-06	4.08319e-05	2.37595e-05	8.68499e-06	0	0	0	0	1.83592e-05	0	0	0	0	4.70947e-05	7.21623e-06
Hephaestin	HEPH	Q9BQS7	6			0	0	0	0	0	0	0	0	0	0	2.33646e-05	0	0	0	0	0	0	1.16182e-05	0	0	6.07189e-06	0	1.89251e-05	0	0	2.1162e-05	0	0	5.89028e-06	0	0	0	0	2.09274e-05	0
Beta-hexosaminidase subunit beta;Beta-hexosaminidase subunit beta chain B;Beta-hexosaminidase subunit beta chain A	HEXB	P07686	2			0	0	0	0	0	0	0	0	0	0	3.27521e-06	0	0	0	0	0	0	0	0	0	3.08495e-06	0	0	0	0	0	0	0	0	0	0	0	0	3.01968e-06	0
Hepatocyte growth factor-regulated tyrosine kinase substrate	HGS	O14964	2			0	0	0	0	0	1.82799e-05	0	0	0	0	0	0	0	0	0	0	0	0	0	0	0	0	0	0	0	0	0	0	0	2.79103e-05	0	0	0	0	0
3-hydroxyisobutyrate dehydrogenase, mitochondrial	HIBADH	P31937	5			0	1.24529e-05	0	0	0	1.19927e-05	4.17086e-05	5.08156e-05	0	0	3.79471e-05	0	0	1.73476e-05	0	0	0	3.99308e-05	3.09014e-06	0	3.80745e-05	0	2.00754e-05	5.66623e-05	0	0.000104928	0	0	8.19802e-05	0	0	0	5.88914e-05	1.55237e-05	7.21174e-06
3-hydroxyisobutyryl-CoA hydrolase, mitochondrial	HIBCH	Q6NVY1	12			0	4.96433e-05	0.000102661	0.000207055	0	4.82902e-05	0	0.000141765	0	0	0.000101188	9.29029e-05	0	0.00010452	0	0.000127733	0	0.000144004	7.16143e-05	0	1.97081e-05	0	0.000225259	0.000110368	0	0.000331985	0.000111785	0	3.50991e-05	0.000155561	4.57899e-05	0	8.26108e-05	0.000137762	9.82679e-05
HIG1 domain family member 1A, mitochondrial	HIGD1A	Q9Y241	3			0	4.82993e-05	0	6.37618e-05	0	0.000217372	4.4601e-05	0.000114515	0	0	3.22645e-05	0	0	8.0836e-05	0.000175904	4.21666e-05	0	0.000103174	2.16294e-05	0	1.89465e-05	0	4.09781e-05	0	0	5.22166e-05	0.000101669	0	6.921e-05	0.000104088	2.65051e-05	0	0.00022907	2.98723e-05	9.99388e-06
Histidine triad nucleotide-binding protein 1	HINT1	P49773	8			0.00022491	8.22188e-05	0	0.000341391	9.00394e-05	0.000410071	0	0.000322931	0	0	0.000320377	0	0	0.000248988	0	0	0	2.79088e-05	0.000238034	0	0.000181543	0.000167096	0.000192982	0.0001229	0	7.68555e-05	0	0	0	0.00025801	0.000263319	4.28014e-05	0.000506464	0.000164069	0.000163036
Histidine triad nucleotide-binding protein 2, mitochondrial	HINT2	Q9BX68	3			0	0	0	0	0	0	0	0.000103714	0	0	3.84968e-05	0	0	5.55575e-05	0	0	0	0.000115193	4.20719e-05	0	2.12361e-05	0	2.05166e-05	3.73914e-05	0	4.73031e-05	0.000150622	0	6.51588e-05	0.000189165	0	9.17844e-05	0.000105893	1.3216e-05	0
Huntingtin-interacting protein 1-related protein	HIP1R	O75146	3			0	0	0	0	0	0	0	1.71521e-05	0	0	0	0	0	0	0	0	0	0	0	0	0	0	0	0	0	0	0	0	0	0	0	0	1.38644e-05	0	0
Histone H1.5	HIST1H1B	P16401	36			0.0232536	0.00307565	0.0193356	0.0175223	0.0118792	0.00558898	0.00670969	0.0110945	0.0261634	0.00984357	0.00186827	0.0203858	0.01874	0.00681664	0.0123151	0.00774718	0.0183314	0.00530353	0.00379778	0.0129905	0.0027272	0.0010369	0.00180536	0.00201848	0.0258051	0.00170237	0.0172582	0.000421545	0.00642728	0.00496422	0.0023664	0.0134217	0.00914178	0.00132847	0.00110733
Histone H1.2	HIST1H1C	P16403	37			0.000931838	0.000669217	0.00393921	0.00393418	0.000232591	0.000811262	0.00217064	0.00245749	0.000516225	0.00992369	0.000660389	0.0069177	0.00461267	0.00170298	0.00756538	0.00121858	0.00336421	0.0012634	0.00182193	0.00732846	0.00117014	0.000408826	0.000714519	0.000601868	0.00273477	5.60635e-05	0.0014793	8.09765e-05	0.00378928	0.00141723	0.000957198	0.00122342	0.000839589	0.000211012	0
Histone H1.3	HIST1H1D	P16402	36			0.00106541	0.000242852	0.00272704	0.00216994	0.000689533	0.000327117	0.000505587	0.000532829	0	0.00343258	0.000192164	0.00387066	0.00178973	0.000782153	0.00106996	0.00024273	0	0.000199669	2.37948e-05	0.00108739	3.65103e-05	1.78386e-05	2.87329e-05	0	0.00333179	0	0.0010037	0	0.000243907	9.1413e-05	2.01824e-05	6.60032e-05	0.000118719	1.60682e-05	0
Histone H1.4	HIST1H1E	P10412	38			0.0554415	0.00835231	0.0630108	0.0394284	0.0336218	0.0127892	0.0406224	0.0202853	0.047881	0.0891815	0.00778257	0.0545316	0.0462704	0.0221783	0.0658159	0.0210471	0.0308079	0.0171785	0.00860641	0.0361587	0.00752813	0.00381715	0.00712729	0.00337487	0.0752663	0.003547	0.0370223	0.000777898	0.0135364	0.0132123	0.00889111	0.0306342	0.0234331	0.00330869	0.00358605
Histone H2A type 1-B/E;Histone H2A type 3	HIST1H2AB;HIST3H2A	P04908;Q7L7L0	15			0.0354116	0.00918444	0.0351062	0.0233761	0.0243305	0.0120964	0.0328125	0.0207268	0.0334065	0.0248737	0.0134209	0.0355478	0.0274703	0.0161197	0.0798806	0.0214503	0.0383095	0.00869342	0.00237861	0.0118246	0.00886626	0.00271121	0.00828924	0.00916261	0.0347559	0.0064208	0.0207668	0.000237178	0.0196578	0.0153654	0.00171485	0.0228998	0.0263438	0.00575497	0.00369767
Histone H2A type 1-D	HIST1H2AD	P20671	15			0	0.00023634	0	0.000314425	0.000162117	0.000813326	0.00031337	0.000664606	0	0.000110167	0	0	0.000251345	0.000503422	0.000608708	0	0.000771004	0.000663792	0	0	0	0	0	0	0	0	0.000251466	0	0	0.000333723	0	0.00083953	0.00150921	0	0
Histone H2A type 1-J;Histone H2A type 1-H;Histone H2A type 1;Histone H2A.J;Histone H2A type 2-C;Histone H2A type 2-A	HIST1H2AJ;HIST1H2AH;HIST1H2AG;H2AFJ;HIST2H2AC;HIST2H2AA3	Q99878;Q96KK5;P0C0S8;Q9BTM1;Q16777;Q6FI13	15			0.000200951	0.00205176	0.00360812	0.000116809	0	0.000325885	0.00115832	0.000353615	0.000218959	0	0	0	0	0.00158784	0	0.00108626	0	0.000146148	0	0	0	0	0	0	0.000273681	0	0.000625362	0	0	2.8896e-05	0	5.55388e-05	0.00292397	0	0
Histone H2B type 1-C/E/F/G/I	HIST1H2BC	P62807	24			0.109576	0.0200166	0.0742096	0.0787589	0.0748095	0.0398444	0.103311	0.0497051	0.11432	0.0375753	0.0303998	0.105033	0.110809	0.0631831	0.211953	0.0710465	0.0958249	0.0361628	0.0125831	0.0186074	0.0344463	0.0167604	0.0184391	0.0170175	0.113723	0.0377483	0.0712813	0.00234362	0.0426665	0.0341531	0.0223511	0.061299	0.0813229	0.0189237	0.0173467
Histone H2B type 1-D	HIST1H2BD	P58876	24			0.00160164	0.00028338	0.00211037	0.00086683	0.000779921	0.000417611	0.00109931	0.000690865	0.00190055	0.000590322	0	0.0015926	0.00111025	0.00033338	0	0	0.00115689	0.000322096	0	0.000596131	0	0	0	0	0.00271955	0	0.000798758	0	0	0.000135293	0	0.000371402	0.00121096	0	0
Histone H2B type 1-H;Histone H2B type 2-F	HIST1H2BH;HIST2H2BF	Q93079;Q5QNW6	24			0.000635768	0	0	0.000247673	0.000311376	7.72763e-05	0.00051543	0.000274232	0.000983717	0	0	0.000318763	0.00038933	4.84764e-05	0	0.000484493	0.00013722	3.52604e-05	0	0	0	0	0	0	0.000375866	0	8.68373e-05	0	0	0	0	8.04439e-05	0.000642605	0	0
Histone H2B type 1-K;Histone H2B type F-S	HIST1H2BK;H2BFS	O60814;P57053	24			0.000393065	0	0	0.000756932	0	0.00104084	0.00170797	0.00141118	0.000351298	0	0	0.00190797	0.00153271	0	0	0.00179868	0.000632945	5.83656e-05	0	0	0	0	0	0	0	0	0	0	0	0	0	0.00021285	0.0042205	0	0
Histone H2B type 1-L;Histone H2B type 1-A	HIST1H2BL;HIST1H2BA	Q99880;Q96A08	22			0	0.000119818	0	0.000384002	0.000239407	0	0	0	0	0	6.81906e-05	0	0	0	0	0	0	0	0	0	0	0	7.65389e-05	0	0.000635121	0	0	0	0	0	0	0	0	1.83566e-05	0
Histone H2B type 1-M	HIST1H2BM	Q99879	24			0	0.000104039	0	8.80765e-05	0.000404784	0.000197745	0.000134863	0.000459405	0.000317069	0	0	0	0.000471059	0.000182748	0	9.84216e-05	0	0.000210224	0	0	0	0	0	0	0	0	0.000561266	0	0	0.000140151	0	0	0.000636593	0	0
Histone H2B type 1-N	HIST1H2BN	Q99877	24			0	0	0	0	0.000423822	0.000150143	0.000721782	0.000434554	0.000874159	0.000118904	0	0	0.000740974	0.000178286	0	0	0.00113906	8.92044e-05	0	0	0	0	0	0	0.00122049	0	0.000675358	0	0	3.65175e-05	0	0	0.000366373	0	0
Histone H4	HIST1H4A	P62805	23			0.0102375	0.00766873	0.00920443	0.0160267	0.0127792	0.0162936	0.0259574	0.0207205	0.0119498	0.00711444	0.00639671	0.00451119	0.0184354	0.0231546	0.0356796	0.00496216	0.0185311	0.0135406	0.00149275	0.0101496	0.00805805	0.00111412	0.00565103	0.00877134	0.0145223	0.00272719	0.00908336	0	0.00991472	0.0143539	0.0010063	0.0175463	0.0255324	0.00454223	0.00178128
Histone H2A type 2-B	HIST2H2AB	Q8IUE6	10			0	0	0	0	0	0.000293664	0	0.00023479	0	0	0.000478786	0	0	0.000358524	0	0	0	0.000230583	0	0	0.000301763	0	0.000424209	8.0521e-05	0	0	0	0	0.000294152	0.000275109	0	0	0.000304039	9.07248e-05	0
Histone H2B type 2-E	HIST2H2BE	Q16778	23			0	0.000170608	0	0	8.17029e-05	0.00111372	0.000268387	0.000601807	0	0	0	0	0.000226438	0.000388115	0	9.22672e-05	0.000240846	0.000476415	0	0	0.000401095	0	0.000609544	0	0	0.000309448	0	0	0.000590235	0.000244223	0	0.000417945	0.00146452	0.000367872	0
Histone H3.2;Histone H3.1;Histone H3.3C	HIST2H3A;HIST1H3A;H3F3C	Q71DI3;P68431;Q6NXT2	21			0.0497191	0.0145248	0.040282	0.0102475	0.0244323	0.0206141	0.0262487	0.021519	0.0188599	0.0205881	0.012922	0.0148232	0.0266267	0.0299363	0.0264636	0.0217393	0.016945	0.013218	0.00546574	0.00664463	0.0162374	0.00104235	0.0119823	0.00979522	0.0392291	0.0117232	0.020594	0	0.0222323	0.0138153	0.00516862	0.0324013	0.027059	0.00926099	0.00918418
Histone H2B type 3-B	HIST3H2BB	Q8N257	18			0	0	0	0	0	0	0	1.34637e-05	0	0	0	0	0	0	0	0	0	0	0	0	0	0	0	0	0	0	0	0	0	0	0	0	3.77117e-05	0	0
Histone H3.1t	HIST3H3	Q16695	17			0	0	0	0	0	0	0	0	0	0	0	0	0	0	0	0	0	0	0	0	0	0	3.55731e-05	0	0	0	0	0	0	0	0	0	0	0	0
Hexokinase-1	HK1	P19367	8			0	7.91818e-06	0	0	0	1.50809e-05	0	0	0	0	3.54291e-05	0	0	0	0	0	0	0	0	0	0	0	0	0	0	8.6504e-05	0	0	0	0	2.49578e-05	0	0	0	0
Hexokinase-2	HK2	P52789	15			0	0	0	0	0	2.80222e-05	0	9.97796e-06	0	0	6.69594e-05	0	0	9.60569e-05	0	0	0	0	3.58749e-05	0	0	0	0.000154007	0	0	0.000244515	0	0	6.444e-05	0	0	0	1.58644e-05	0.000143722	8.79432e-05
HLA class I histocompatibility antigen, A-66 alpha chain;HLA class I histocompatibility antigen, A-34 alpha chain;HLA class I histocompatibility antigen, A-74 alpha chain	HLA-A	P30457;P30453;P30459	13			3.67516e-05	0	0	9.22607e-05	2.76361e-05	3.8463e-05	7.40819e-05	5.97183e-05	3.95231e-05	0	0	0	3.70105e-05	0	0	0	0.000347931	7.37069e-05	0	0.000726508	1.42691e-05	0	1.74493e-05	0.000126992	0.000187815	0.000309582	0.000388656	0	0.000128815	5.33608e-05	0	6.89102e-05	0	0	0
HLA class I histocompatibility antigen, A-2 alpha chain	HLA-A	P01892	11			0	0	0	0	0	0	2.47448e-05	1.53163e-05	0	0	6.43756e-05	0	0	0	0	0	9.7501e-05	0.000114724	2.99918e-05	0	8.50554e-05	0	0	3.56671e-05	0	2.34764e-05	0	0	1.94423e-05	1.71294e-05	0	0	0	0	0
HLA class I histocompatibility antigen, A-23 alpha chain;HLA class I histocompatibility antigen, A-24 alpha chain	HLA-A	P30447;P05534	10			0	0	0	0	1.764e-05	2.27961e-05	0	0	0	0	1.24928e-05	0	0	1.69452e-05	0	0	0	3.13072e-05	9.48027e-06	0	2.47044e-05	1.49929e-05	7.92304e-06	3.41763e-05	0	2.47639e-05	0	0	1.16947e-05	3.25773e-05	1.02964e-05	0	0	2.74653e-05	0
HLA class I histocompatibility antigen, A-31 alpha chain;HLA class I histocompatibility antigen, A-33 alpha chain	HLA-A	P16189;P16190	11			0	0	0	0	0	0	0	0	0	0	0	0	0	0	0	0	0	0	0	0	0	0	0	0	0	0	0	0	0	0	0	0	3.30642e-05	0	0
HLA class I histocompatibility antigen, A-25 alpha chain;HLA class I histocompatibility antigen, A-43 alpha chain;HLA class I histocompatibility antigen, A-26 alpha chain;HLA class I histocompatibility antigen, A-32 alpha chain	HLA-A	P18462;P30456;P30450;P10314	13			0	0	0	0	0	0	0	0	0	0	0	0	0.000288965	0	0	0	0	0	0	0	0	0	0	5.12278e-05	0.000333293	0	0	0	0	0	0	0	0	0	0
HLA class I histocompatibility antigen, B-67 alpha chain	HLA-B	Q29836	9			0	0	0	0.000209126	0	5.67188e-05	0.000113269	0	0	0	1.56461e-05	0	0	0	0	2.99497e-05	0	4.27255e-05	0	0.000379441	2.05227e-05	0	0	0	0.000233971	2.64843e-05	4.56247e-05	0	0	5.49418e-05	0	0	0	0	0
HLA class I histocompatibility antigen, B-38 alpha chain;HLA class I histocompatibility antigen, B-44 alpha chain	HLA-B	Q95365;P30481	9			0	0	0	0	0	0	0	0	0	0	0	0	0	0	0	0	0	0	0	0	0	0	0	0	9.64938e-05	7.89083e-05	7.20895e-05	0	3.30912e-05	0	0	0	0	0	0
HLA class I histocompatibility antigen, B-42 alpha chain;HLA class I histocompatibility antigen, B-7 alpha chain;HLA class I histocompatibility antigen, B-81 alpha chain	HLA-B	P30480;P01889;Q31610	8			0	0	0	0	0	0	0	0	0	0	0	0	0	0	0	0	0	1.36541e-05	0	0	0	0	0	0	0	0	0	0	0	0	0	0	0	0	0
HLA class I histocompatibility antigen, B-37 alpha chain	HLA-B	P18463	9			0	0	0	0	0	0	0	0	0	0	0	0	0	7.8545e-06	0	0	0	0	0	0	0	0	0	0	0	0	0	0	0	0	0	0	0	1.19059e-05	0
HLA class I histocompatibility antigen, Cw-7 alpha chain	HLA-C	P10321	6			0	0	0	0	0	0	0	0	0	0	2.68832e-05	0	0	0	0	0	0	0	0	0	2.94605e-05	0	5.70011e-05	1.93845e-05	0	0	0	0	0	0	0	0	0	0	0
HLA class II histocompatibility antigen, DP beta 1 chain;HLA class II histocompatibility antigen, DRB1-12 beta chain;HLA class II histocompatibility antigen, DRB1-13 beta chain;HLA class II histocompatibility antigen, DRB1-11 beta chain;HLA class II histocompatibility antigen, DRB1-3 chain;HLA class II histocompatibility antigen, DRB1-15 beta chain	HLA-DPB1;HLA-DRB1	P04440;Q95IE3;Q5Y7A7;P20039;P01912;P01911	1			0	0	0	0	0	0	0	0	0	0	0	0	0	0	0	0	0	3.13124e-05	0	0	0	0	0	0	0	0	0	0	0	0	0	0	0	0	0
Porphobilinogen deaminase	HMBS	P08397	2			0	0	0	0	0	0	0	0	0	0	0	0	0	0	0	0	0	0	0	0	0	0	0	1.04993e-06	0	0	0	0	0	0	0	0	1.59426e-05	0	0
High mobility group protein HMG-I/HMG-Y	HMGA1	P17096	7			9.8716e-05	3.90312e-05	0	3.46845e-05	4.64744e-05	6.35567e-05	7.19934e-05	0.000259182	0.00012808	0.000155305	1.71183e-05	0	0.000163952	5.08108e-05	0	0	0	0.000144347	0.000153971	0	0.000294974	0	1.14495e-05	3.38387e-05	0	6.12246e-05	0	0	0.000228415	0.000105606	0	0.000105043	0	0	0
High mobility group protein B1;Putative high mobility group protein B1-like 1	HMGB1;HMGB1P1	P09429;B2RPK0	22			0.00120834	0.000552732	0.00108061	0.000903852	0.00084048	0.000976758	0.000476084	0.00221963	0.00111994	0.0014022	0.00045243	0.00143274	0.00155287	0.000832658	0.000555434	0.000305007	0.00121511	0.00134386	0.000536489	0.000470425	0.00111045	0.000775051	0.000587778	7.00459e-05	0.000530688	0.000614121	0.000535744	0	0.00059187	0.000984997	0.000219116	0.00110938	0.00181073	0.00059146	0.000136475
High mobility group protein B2	HMGB2	P26583	14			0.000562223	2.97113e-05	0.000353429	0.000179132	0.000160539	0.000277191	0.000340661	0.000440336	0.00062324	0.000334617	0.000135828	0.000489921	0.0002384	2.53804e-05	0.000346252	1.68602e-05	0.000498534	0.000375222	0.000372102	0.000246662	0.000601188	0.000288691	0.00032662	2.59635e-05	7.72995e-05	0.000265289	0.000387279	7.51178e-05	0.000186975	0.000133695	0.00026056	0.000330115	0.000116912	0.000189967	2.68573e-05
Hydroxymethylglutaryl-CoA lyase, mitochondrial	HMGCL	P35914	11		Butyrate metabolism	0	0	0	2.30032e-05	0	0	0	0	0	0	1.62758e-05	0	0	0	0	0	0	0	0	0	3.24049e-05	0	6.1092e-05	7.69711e-05	0	0.000119399	0	0	0	0	0	0	0	6.83613e-05	6.2044e-05
Hydroxymethylglutaryl-CoA synthase, cytoplasmic	HMGCS1	Q01581	4			0	0	0	0	0	0	0	0	0	0	0	0	0	0	0	0	0	0	0	0	0	0	0	0	0	0	0	0	0	0	0	0	0	0	0
Hydroxymethylglutaryl-CoA synthase, mitochondrial	HMGCS2	P54868	19		Butyrate metabolism	0	0.000252526	0	0.000148238	0	4.82554e-05	0	0.000264431	0	0	0.000740502	0	0.000126728	0.000150267	0	0.000264151	0	0.000106855	5.34102e-05	0	0.000575761	0	0.000460734	0.000270673	0	0.00157631	0	0	0.000706347	0.00020187	0.000137378	0	2.73485e-05	0.000822656	0.00078953
Non-histone chromosomal protein HMG-14	HMGN1	P05114	4			8.59323e-05	0	0.000172779	5.44141e-05	0	1.50284e-05	0	9.51185e-05	0	6.40392e-05	0.000166326	0.000135113	6.70452e-05	5.64882e-05	0.000238045	0	0	0	7.31324e-05	0.000155433	0.000183736	9.93884e-05	0.000156347	5.26483e-05	0	6.98266e-05	9.30185e-05	0	0.000101744	3.87428e-05	3.63152e-05	9.19282e-05	0	4.8347e-05	2.4875e-05
Non-histone chromosomal protein HMG-17	HMGN2	P05204	5			0.00012962	5.91083e-05	0	3.83663e-05	5.68042e-05	4.91899e-05	8.19062e-05	0.000138165	0	0	0.000554249	0.000726283	0	5.32297e-05	0	0	0	2.62871e-05	0.000642647	0	0.0010841	0.000431041	0.000188804	0.000152482	0	6.46699e-05	0.000175681	0	0.000429266	0.000124544	0.000292023	0.000150832	7.25381e-05	5.77912e-05	6.24133e-05
High mobility group nucleosome-binding domain-containing protein 4	HMGN4	O00479	4			9.94407e-05	0	0.000177095	0	0	1.91224e-05	0	6.4847e-05	0.000125352	0.000134088	1.54701e-05	0.000112242	8.62972e-05	5.24704e-05	0	0	0	1.90905e-05	0	0	3.08632e-05	0	2.71407e-05	1.02692e-05	0	0	5.16426e-05	0	4.77152e-05	2.31261e-05	0	0	0	0	0
Hematological and neurological expressed 1 protein;Hematological and neurological expressed 1 protein, N-terminally processed	HN1	Q9UK76	3			0.000282982	0.000167594	0	9.6155e-05	0	0.000122161	8.43095e-05	0.000156294	0.000438994	0	0	0.000244902	0.000161405	4.23716e-05	0.000146476	0	0.00010269	7.27118e-05	0	0	2.34262e-05	0	0	0	0	0	0.000357939	0	0	0.00011156	0	0	0	0	0
Hematological and neurological expressed 1-like protein	HN1L	Q9H910	2			0	0	0	0	0	0	0	0	0	0	0	0	0	0	0	0	0	0	0	0	0	0	0	0	0	0	0	0	0	0	0	0	0	0	0
Histamine N-methyltransferase	HNMT	P50135	5			0	0	0	0	0	0	0	0	0	0	0	0	0	0	0	0	0	0	2.59407e-05	0	2.63176e-05	0	8.86884e-06	0	0	0	0	0	0	2.29676e-05	0	0	0	0	3.68269e-05
Heterogeneous nuclear ribonucleoprotein A0	HNRNPA0	Q13151	5			0	0	0	0	0	0	0	2.0922e-05	0	0	1.24758e-05	0	0	0	0	0	0	1.54704e-05	0	0	3.55968e-05	1.78453e-05	0	0	0	0	0	0	0	0	0	0	0	0	0
Heterogeneous nuclear ribonucleoprotein A1;Heterogeneous nuclear ribonucleoprotein A1, N-terminally processed;Heterogeneous nuclear ribonucleoprotein A1-like 2	HNRNPA1;HNRNPA1L2	P09651;Q32P51	25			0.00131969	0.000755679	0.000868993	0.000722132	0.000707379	0.000214395	0.000489284	0.000861844	0.00122317	0	0.00042886	0.000802503	0.000627061	0.000114601	0.000170669	0	0.000673378	0.000521943	0.00021282	0	0.00109792	0.000212435	0.00047795	0.000376473	0	0.000484544	0.000475013	0	0.000413403	0.000539883	9.05057e-05	0.000517692	0.000735777	0.000962645	4.99139e-05
Heterogeneous nuclear ribonucleoproteins A2/B1	HNRNPA2B1	P22626	30			0.00232992	0.00144411	0.00217462	0.00146411	0.000955992	0.00117615	0.000783138	0.00252919	0.00223917	0	0.00111072	0.00271947	0.00126405	0.000905031	0.000344155	0.000266282	0.00195341	0.00140559	0.00127244	0.00104595	0.00175951	0.00178415	0.00163527	0.00106979	0	0.00141251	0.00190919	1.72658e-05	0.00124238	0.00198533	0.00103211	0.00109051	0.00129928	0.00184737	0.000640004
Heterogeneous nuclear ribonucleoprotein A3	HNRNPA3	P51991	21			0.000201694	0.00014396	0	0.000363763	0.000115848	0.000285298	5.62397e-05	0.000417041	0.00025366	6.07943e-05	9.71974e-05	0.000316871	9.3309e-05	8.17602e-05	0	0	0.000332436	0.000152924	0.000262353	0.000187703	0.000474509	0.00019733	0.000180399	0.000290372	0	7.07906e-05	0.000208042	0	0.00012641	0.000285803	4.56364e-05	0.000338728	0.000174882	0.00013029	9.4728e-06
Heterogeneous nuclear ribonucleoprotein A/B	HNRNPAB	Q99729	11			0	0.000123446	0	0	0.000161177	0.000137072	0	0.000318557	0	0	0.000114592	0	0.000161769	7.36182e-05	0	0	0	1.43994e-05	0.000243667	0	0.000253109	3.08771e-05	0	1.89615e-05	0	0.000382392	0.000169405	0	0	2.33142e-05	0	2.28459e-05	2.99222e-05	9.84699e-06	4.145e-05
Heterogeneous nuclear ribonucleoproteins C1/C2	HNRNPC	P07910	28			0.00313459	0.00096488	0.00464612	0.00083316	0.00175621	0.00104179	0.00113948	0.00192834	0.0041106	0.000530767	0.000498271	0.00396893	0.00275691	0.00122487	0.000734679	0.000699098	0.00277311	0.000734873	0.000419429	0.00161908	0.00109559	0.00127241	0.000797053	0.000364828	0.000961167	0.000376144	0.00159718	3.15222e-05	0.000579815	0.00161836	0.000206422	0.00103511	0.00152749	0.000507855	0.000181704
Heterogeneous nuclear ribonucleoprotein D0	HNRNPD	Q14103	12			0	0.000129485	0	0.000233908	0	0.000467331	0.000362525	0.000910564	0	0	0.00015103	0	6.95157e-05	1.65935e-05	0	0.00013168	0.000930878	0.000452454	0.00013395	0.000425703	0.000339145	0.000267818	0.000313507	0.000119895	0	0.0001165	0.000402868	0	0.00014353	0.000363229	8.76452e-05	0.000427255	0.000340731	0.000281453	0
Heterogeneous nuclear ribonucleoprotein D-like	HNRNPDL	O14979	7			0	0	0	0	0	0	0	0.000107376	0	0	0	0	2.39644e-05	0	0	0	0	0	0	0	3.94788e-05	7.04958e-05	0	3.06574e-05	0	1.2876e-05	0	0	2.79533e-05	0	0	0	0	0	0
Heterogeneous nuclear ribonucleoprotein F;Heterogeneous nuclear ribonucleoprotein F, N-terminally processed	HNRNPF	P52597	9			0	0.000106238	6.848e-05	6.39577e-05	0.000114553	6.12928e-05	8.04973e-05	0.000188001	9.73541e-05	0	4.99814e-06	0	8.26858e-05	6.09595e-05	0	2.19023e-05	4.92649e-05	8.2394e-05	0	0	5.25083e-05	0	5.93587e-05	5.86453e-05	0	0	4.68699e-05	0	0	0.000102557	0	1.81466e-05	0.00024197	3.18692e-05	1.35295e-05
Heterogeneous nuclear ribonucleoprotein H;Heterogeneous nuclear ribonucleoprotein H, N-terminally processed	HNRNPH1	P31943	10			7.88528e-05	0.000182131	0.000177154	9.13192e-05	0.000145625	0.000208411	7.99327e-05	0.000171542	0.000115569	0	0.000103551	0.000107384	7.74124e-05	6.40249e-05	0	3.57959e-05	9.92752e-05	0.000117972	0	0	0.000184226	1.90199e-05	8.72566e-05	9.70803e-05	0	0.000103092	0.000100682	0	0.000101437	0.000138746	1.94522e-05	9.94092e-05	0.000177027	0.00014964	4.51622e-05
Heterogeneous nuclear ribonucleoprotein H3	HNRNPH3	P31942	2			0	3.30022e-05	0	0	0	3.58541e-05	0	3.52384e-05	0	0	0	0	0	0	0	0	0	0	0	0	0	0	0	0	0	0	0	0	0	0	0	0	2.97214e-05	0	0
Heterogeneous nuclear ribonucleoprotein K	HNRNPK	P61978	24			0.000559304	0.000888144	5.01673e-05	0.000576757	0.00107846	0.000780015	0.000453745	0.000857085	0.0013782	0	0.00717572	0.000446205	0.000832113	0.000483115	0	0.000641506	0.000192372	0.000219227	0.000657291	0	0.000849188	0.000540163	0.000845376	0.000261706	0	0.000664885	0.000169232	0	0.000537334	0.00041142	0.000712686	0.000242433	0.000978297	0.000513531	0.000220289
Heterogeneous nuclear ribonucleoprotein L	HNRNPL	P14866	12			0	6.08116e-05	0	0	6.08623e-05	3.87331e-05	0	0.000183827	0	0	8.97555e-05	0	3.20758e-05	8.57064e-05	0	0	0	7.17095e-05	6.84491e-05	0	0.000225015	0	0.000216744	3.3985e-05	0	6.53348e-05	0	0	7.58041e-05	0.000110491	0	2.82664e-05	0.000175337	0.000129749	7.62249e-05
Heterogeneous nuclear ribonucleoprotein M	HNRNPM	P52272	36			0.000991161	0.000127217	7.79606e-05	0.000358904	0.000209527	0.000209401	0.000132295	0.00112218	0.000510521	0.000101242	0.000103786	0.000498208	0.000297472	0.000205484	0	3.84868e-05	0.000279085	0.000133023	0.000149284	0.000208422	0.000551675	3.50446e-05	0.00011645	0.000154145	0	0.000161855	0.000169193	0	0.000281428	0.000235307	0	0.000369326	0.000575686	0.000148422	3.76576e-05
Heterogeneous nuclear ribonucleoprotein R	HNRNPR	O43390	21			0	2.24835e-05	0	0	0	3.11015e-05	0	1.9562e-05	0	0	2.1803e-05	0	0	0	0	0	0	4.14942e-05	5.78355e-05	0	9.08157e-05	0	2.65556e-05	5.7869e-05	0	7.80939e-05	0	0	7.07071e-06	2.37008e-05	5.28617e-05	0	0.000109665	2.2017e-05	5.53512e-06
Heterogeneous nuclear ribonucleoprotein U	HNRNPU	Q00839	36			0.00071892	0.000648177	0.000743232	0.000848262	0.000532821	0.00107952	0.000651333	0.00144803	0.000740168	0.000435217	0.000214425	0.000775361	0.00102499	0.00034785	0	0.000503276	0.000732756	0.000708945	0.000139115	0.000785093	0.000347854	8.83881e-06	0.000341709	0.000134283	0	0.000453461	0.000864918	0	0.000383441	0.00067327	7.26139e-05	0.000410658	0.00100034	7.80807e-05	0.000107387
Heterogeneous nuclear ribonucleoprotein U-like protein 1	HNRNPUL1	Q9BUJ2	3			0	0	0	0	0	2.43043e-05	0	2.16787e-05	0	0	0	0	0	3.16241e-05	0	0	0	0	2.20745e-05	0	1.48186e-05	0	3.51491e-05	0	0	3.4573e-05	0	0	1.50774e-05	2.67043e-05	1.38789e-05	0	0	3.00881e-05	7.15074e-06
Heterogeneous nuclear ribonucleoprotein U-like protein 2	HNRNPUL2	Q1KMD3	23			0	0	0	0.000111883	6.3226e-05	7.32436e-05	0	6.74532e-05	0	0	0.000169102	0	6.01592e-05	3.90979e-05	0	0	0.000103555	1.77999e-05	2.32744e-05	0	0.000108683	0	0.000106992	0.000163807	0	8.98131e-05	8.25177e-05	0	4.5932e-05	3.94192e-05	2.65171e-05	3.29459e-05	0.000104036	0.000112379	9.45038e-06
Protein Hook homolog 1	HOOK1	Q9UJC3	2			0	0	0	0	0	0	0	0	0	0	0	0	0	9.22647e-06	0	0	0	0	0	0	0	0	0	0	0	0	0	0	0	0	0	0	0	0	0
Haptoglobin;Haptoglobin alpha chain;Haptoglobin beta chain	HP	P00738	34			0	0.00152777	0	0	0.000822827	0.000227961	0.00200941	9.20082e-05	0	0	0.0026678	0	1.92983e-05	0.000322489	0.000123249	0.000673255	0.000572061	5.39294e-05	0.00311637	0.000189258	0.00739332	0.0100055	0.0027202	0.00758066	0	0	0	0.000717095	0.0011705	0.00100658	0.00241249	0.000165134	0	0.00222417	0.00361968
Heterochromatin protein 1-binding protein 3	HP1BP3	Q5SSJ5	28			0	7.57147e-05	0.000125402	0.000394849	0.000365299	0.000282598	0.00032713	0.000586788	0.000617155	0.000393865	0.000189952	0.00011898	0.000543198	0.0002622	0	0.000331055	0.000650384	0.000198056	5.34554e-05	0.0010135	8.92491e-05	2.51125e-05	0.00011592	8.36826e-05	0.000524372	0.000163656	0.000482705	0	0.000186195	0.000255498	5.1541e-05	0.000142862	0.000322834	2.17786e-05	5.00567e-05
15-hydroxyprostaglandin dehydrogenase [NAD(+)]	HPGD	P15428	5			0	1.77916e-05	0	0	0	0	0	0	0	0	0	0	0	0	0	0	0	9.26486e-06	4.58134e-05	0	0	0	0	0	0	3.54366e-05	0	0	0	0	0	0	0	0	0
Haptoglobin-related protein	HPR	P00739	18			0	0	0	0	0	0	0	0	0	0	0	0	0	0	0	0	0	0	0	0	0	0	0	6.39729e-05	0	0	0	0	0	0	0	0	0	0	0
Hypoxanthine-guanine phosphoribosyltransferase	HPRT1	P00492	4			0	0	0	0	0	3.46655e-06	0	0	0	0	2.5411e-06	0	0	0	0	0	0	0	5.89386e-06	0	1.60165e-06	0	1.03351e-05	0	0	0	0	0	0	0	0	0	0	2.33344e-05	0
Hemopexin	HPX	P02790	15			0	0.000188747	0	0	0	5.20593e-06	0	0	0	0	0.000155548	0	0	0	0	0	5.05729e-05	0	0.000321937	0	0.000680314	0.000506123	0.000267132	0.00178572	0	5.10295e-05	0	0.000136114	0	0	0.000190303	0	0	0.000445679	0.0006704
Histidine-rich glycoprotein	HRG	P04196	8			0	4.64975e-05	0	0	0	1.65365e-05	0	0	0	0	7.16094e-06	0	0	2.90056e-05	0	0	0	1.13392e-05	0	0	5.2219e-06	7.53671e-05	0	0.000176338	0	0	1.63062e-05	0	5.16586e-06	2.14742e-05	0	0	0	1.26636e-06	0
Hornerin	HRNR	CON__Q86YZ3;Q86YZ3	12			0	0	0.000163348	0	0	1.9439e-05	3.62525e-05	0.000158872	7.50686e-05	0	0	0.00142989	0	0	0	0	0	0	8.55329e-05	0	3.37e-05	0.000277208	0	1.69579e-06	0	0	0.000101931	0.000286558	4.89114e-05	0	5.98184e-05	9.96518e-05	0	0	0
Ribonuclease UK114	HRSP12	P52758	3			0	0	0	0	0	0	0	8.93959e-06	0	0	0	0	0	0	0	0	0	0	0	0	0	0	0	4.52927e-05	0	2.28293e-05	0	0	0	0	0	0	2.49936e-05	1.98494e-05	0
Heat shock factor-binding protein 1	HSBP1	O75506	1			0	0	0	0	0	0	0	0	0	0	0	0	0	0	0	0	0	0	0	0	1.71308e-06	0	0	2.14067e-06	0	0	0	0	0	0	0	0	0	0	0
Corticosteroid 11-beta-dehydrogenase isozyme 2	HSD11B2	P80365	6			0	0	0	1.28409e-05	0	1.50337e-05	0	0	0	0	3.96197e-05	0	0	3.52688e-05	0	1.85662e-05	0	0	1.7301e-05	0	1.59064e-05	0	0	3.15631e-05	0	6.11242e-05	0	0	4.14777e-05	2.85417e-05	0	0	0	0	1.92819e-05
3-hydroxyacyl-CoA dehydrogenase type-2	HSD17B10	Q99714	10			0	0	0	3.68798e-05	0	0.000152967	0	3.93808e-05	0	0	9.66891e-05	0	0	2.72114e-05	0	2.27362e-05	0	6.34512e-05	0	0	1.5667e-05	0	0.000157222	3.62212e-05	0	8.10639e-05	0	0	4.34819e-05	4.31817e-05	6.28159e-06	0	7.77034e-05	3.24778e-05	5.39294e-06
Estradiol 17-beta-dehydrogenase 11	HSD17B11	Q8NBQ5	3			0	0	0	0	0	0	0	0	0	0	1.89039e-05	0	0	0	0	0	0	0	0	0	3.63504e-05	0	4.37343e-05	2.4127e-05	0	9.78193e-05	0	0	8.39139e-05	0	0	0	0	6.31156e-05	0
Very-long-chain 3-oxoacyl-CoA reductase	HSD17B12	Q53GQ0	3			0	0	0	0	0	0	0	0	0	0	3.32482e-05	0	0	0	0	0	0	0	0	0	8.53767e-06	0	2.07926e-05	3.35377e-06	0	6.54687e-05	0	0	6.21831e-05	0	0	0	0	4.1366e-05	0
Peroxisomal multifunctional enzyme type 2;(3R)-hydroxyacyl-CoA dehydrogenase;Enoyl-CoA hydratase 2	HSD17B4	P51659	23			8.64824e-05	6.88946e-05	0.000119878	0.00036699	0	0.000157736	6.44488e-05	1.082e-05	6.98097e-05	0	6.45356e-05	0	3.31192e-05	8.5125e-05	0	0.000216457	0.000200316	9.63676e-05	6.3968e-05	0	4.8145e-05	0	0.000152692	5.84681e-05	6.82783e-05	0.000400778	8.15535e-05	0	0.000331209	0.000238283	8.56807e-05	0.000108539	0.000306268	0.000145765	0.000100543
Estradiol 17-beta-dehydrogenase 8	HSD17B8	Q92506	4			0	1.49733e-05	0	0	0	0.000167989	3.23923e-05	5.7179e-05	0	0	0	0	0.000135362	3.71736e-05	0	7.31424e-05	0.000122911	4.22332e-05	0	0	0	0	0	0	0	0	0	0	0	0.000104219	0	8.55436e-05	3.57023e-05	1.16612e-05	0
Hydroxysteroid dehydrogenase-like protein 2	HSDL2	Q6YN16	11			0	0	0	0.000178872	0.000237352	7.9275e-05	3.67242e-05	6.84342e-05	7.30293e-05	0	3.74068e-05	8.82798e-05	4.88308e-05	8.78238e-05	0	0.000107054	0.000116536	0	0	0	6.59466e-06	0	0	6.1191e-05	0	0.000176596	0	0	0.000133897	4.12566e-05	0	0	2.64991e-05	0	3.49472e-06
Heat shock protein HSP 90-alpha	HSP90AA1	P07900	43			0	0.000457201	0	0.000296159	0.000201339	0.000681142	9.14794e-05	0.000783087	0	0	0.000790418	0.000224253	0.000242797	0.00024031	0.000188159	0.00016941	0.000324742	0.000731178	0.000935233	0.000262093	0.00146555	0.000711959	0.00209145	0.000657028	0.000122394	0.00258863	0	0.000526924	0.000651198	0.000567754	0.00149787	2.37324e-05	0.000492529	0.00264965	0.00141278
Heat shock protein HSP 90-beta	HSP90AB1	P08238	31			0.000388842	0.000188091	0	0	0.000138177	0.000464654	6.66972e-05	0.000365847	0.000108099	0	0.000230992	0.000136543	0	0.000200946	0	0.000101996	0.000401514	0.000302996	0.0001512	0	0.000452022	0.000219331	0.000316508	0.00034601	9.72003e-05	0.000443978	0.000146743	7.32407e-05	0.000204807	0.000453064	0.000236898	0	0.000639488	0.000878998	0.000151732
Endoplasmin	HSP90B1	P14625	56			0.00156254	0.000756819	0.000899428	0.00574648	0.000884997	0.00188111	0.00172546	0.00150063	0.00118714	0	0.00172566	0.000188491	0.000725746	0.00143214	0.000249788	0.00218735	0.00379938	0.00176406	0.000797767	0.00147395	0.00118083	0.00028864	0.00279206	0.00157709	0.000740986	0.005792	0.00250914	0.000115159	0.00258061	0.00260613	0.00178855	0.00101148	0.00309882	0.00321428	0.00125915
Heat shock 70 kDa protein 1B;Heat shock 70 kDa protein 1A	HSPA1B;HSPA1A	P0DMV9;P0DMV8	49			0.000167712	0.00234198	0.000148374	0.00126748	0.00133229	0.00252635	0.00068326	0.00325373	0.000399966	0.00010186	0.00186902	0.00130059	0.00069345	0.00104464	8.40827e-05	0.00178917	0.000476459	0.00157931	0.00182039	0.000438455	0.00157875	0.000588625	0.00198055	0.00103429	0	0.00299675	0.000813751	0.000992459	0.00102894	0.00178239	0.00169994	0.000750612	0.00252482	0.00235234	0.00206884
Heat shock-related 70 kDa protein 2	HSPA2	P54652	30			0	0.000120728	0	0.000180597	5.70001e-05	4.0579e-05	2.90417e-05	6.53251e-05	0	0	7.19596e-05	0	3.02822e-05	1.28625e-05	0	9.00248e-05	0	7.86687e-05	1.95362e-05	0	7.55866e-05	0	0.000110799	2.09792e-05	0	3.51822e-05	4.16535e-05	0	5.86595e-05	9.19245e-05	2.73093e-05	0.000132528	5.93097e-05	0.000102692	4.46029e-05
Heat shock 70 kDa protein 4	HSPA4	P34932	21			0	4.2716e-05	0	0	0	3.79147e-05	0	4.33897e-05	0	0	9.01236e-05	0	0	2.07888e-05	0	0	0	4.02462e-05	0.000119036	0	0.000127161	0	9.80433e-05	2.3877e-05	0	8.75594e-05	0	4.96087e-05	1.70335e-05	2.24251e-05	2.07646e-05	0	1.89969e-05	0.000240611	4.63587e-05
78 kDa glucose-regulated protein	HSPA5	P11021	70			0.00627647	0.00334255	0.0057499	0.0110022	0.00215242	0.00424085	0.00318067	0.00552482	0.00194606	0.000759288	0.00239435	0.00417718	0.00460638	0.0030329	0.00234077	0.00334745	0.00414344	0.00376388	0.00160624	0.00225702	0.00305563	0.00121158	0.00225046	0.00228224	0.00391291	0.00591026	0.00355247	0.000300969	0.00663829	0.00507465	0.00148014	0.00557275	0.0117451	0.00397629	0.00123696
Heat shock 70 kDa protein 6;Putative heat shock 70 kDa protein 7	HSPA6;HSPA7	P17066;P48741	14			0.000850172	0.000677734	0.000948393	0.00086796	0.000831396	0.000529744	0.000705544	0.000782669	0.000992648	0.00028447	0.000123591	0.000816815	0.000557842	0.000657887	0.000732953	0.000828003	0.00120494	0.000683662	0.00016168	0.00202331	0.00021576	9.47099e-05	0.000110902	0.000138832	0.000596092	0.000133421	0.00133466	0	0.000134817	0.00110556	0.000138915	0.000993283	0.000536078	0.000303701	0.00012995
Heat shock cognate 71 kDa protein	HSPA8	P11142	55			0.00236121	0.00417296	0.00121942	0.00308919	0.00293253	0.00363293	0.0025723	0.0041082	0.00202488	0.000678627	0.00190102	0.00184702	0.00202452	0.00209528	0	0.00328377	0.00241943	0.00334816	0.00202309	0.000694892	0.00348095	0.00206989	0.00311194	0.00233001	0.000528257	0.00397878	0.00316655	0.00221924	0.00243127	0.00483357	0.00269646	0.00315216	0.00609674	0.00550135	0.00209114
Stress-70 protein, mitochondrial	HSPA9	P38646	60			0.00219279	0.00105956	0.00338259	0.00406524	0.00287745	0.00288075	0.00287349	0.00382327	0.00320925	0.00111728	0.00178318	0.00269217	0.00313418	0.00191033	0.00197432	0.00393669	0.00367153	0.00271073	0.00109521	0.00290174	0.00187914	0.000242593	0.00199446	0.00150325	0.00236265	0.00377572	0.00421585	0.000127396	0.00399973	0.00153061	0.000854067	0.00260189	0.00446424	0.00112285	0.00127814
Heat shock protein beta-1	HSPB1	P04792	17			0	0.000515884	0	0.000348483	0.000587904	0.00114986	0.000153925	0.0021234	0.0013121	0.00127831	0.000394089	0	0.000565882	0.000251027	0	0	0.00049536	0.000539471	0.000409603	0.000230255	0.000313276	0.00113109	0.000177095	0.000200414	0	0.000193539	0.000277885	0	0.00026941	0.000591089	0.000264108	0.000295514	0.000831686	0.000331011	0.000179285
Heat shock protein beta-6	HSPB6	O14558	4			0	0	0	0	0	0	0	0	0	0	3.95793e-05	0	0	0	0	0	0	0	0	0	1.57923e-05	0	0	2.90006e-05	0	0	0	0	0	0	0	0	0	0	0
60 kDa heat shock protein, mitochondrial	HSPD1	P10809	64			0.0111648	0.00477136	0.0140278	0.013486	0.0105063	0.0110487	0.0103716	0.00992578	0.0114447	0.00645396	0.00576426	0.0179225	0.0142791	0.00799769	0.0202405	0.0156502	0.0162843	0.00966768	0.00196602	0.0245404	0.00491059	0.000524275	0.00403689	0.00262586	0.0134092	0.00910047	0.0161095	0.000106909	0.00920107	0.00790098	0.00232766	0.0114771	0.0113658	0.00308763	0.00261127
10 kDa heat shock protein, mitochondrial	HSPE1	P61604	19			0.00082899	0.000753157	0.00216298	0.00214772	0.00322025	0.00269981	0.00134389	0.00331197	0.00282997	0.000282398	0.00187316	0.000691848	0.00186263	0.00117875	0	0.000335948	0.00034474	0.00133044	0.00196987	0	0.00212779	0.0010994	0.00247266	0.0024158	0.000725947	0.00333011	0.000972154	0.00152043	0.00426442	0.00122117	0.00116812	0.00156781	0.00204359	0.00110006	0.00147024
Basement membrane-specific heparan sulfate proteoglycan core protein;Endorepellin;LG3 peptide	HSPG2	P98160	66			0	0	0	0	0	0	0	0	0	0.00288983	0	0	0	0	0.000166886	0	0	0	0	0	0	0	0	0	0	0	0	0	0	0	0	0	0	0	0
Heat shock protein 105 kDa	HSPH1	Q92598	5			0	0	0	0	0	0	0	1.95015e-05	0	0	0	0	0	0	0	0	0	0	0	0	0	0	0	0	0	0	0	0	0	0	0	0	5.84233e-05	0	0
Oxidoreductase HTATIP2	HTATIP2	Q9BUP3	8			0	1.32385e-05	0	2.07025e-05	0	1.71786e-05	0	0	0	0	1.34021e-05	0	0	1.43123e-05	0	0	0	3.87369e-05	2.80609e-05	0	3.92884e-05	0	2.10157e-05	3.82971e-06	0	8.67137e-05	0	0	8.68654e-05	0	0	0	0.000121592	1.00717e-05	6.38187e-06
Serine protease HTRA2, mitochondrial	HTRA2	O43464	2			0	0	0	0	0	0	0	3.49743e-05	0	0	0	0	0	0	0	2.08948e-05	0	2.23974e-05	0	0	0	0	0	0	0	0	0	0	0	0	0	0	2.09916e-05	0	0
Hypoxia up-regulated protein 1	HYOU1	Q9Y4L1	40			8.35442e-05	0.000217458	0.000180375	0.000489305	0.000240361	5.06939e-05	0.000265819	0.000242921	0.000178619	0	0.000114884	0	0.000251889	0.000173064	0	0.000421381	0.000135901	0.00031074	3.40493e-05	0	0.000123241	0	0.000135628	0.000110678	0	0.00037302	0.000225521	2.33532e-05	0.000274723	0.000322397	4.68393e-05	0.000219167	0.000795839	0.00037883	4.43492e-05
Isoleucine--tRNA ligase, mitochondrial	IARS2	Q9NSE4	4			0	0	0	1.74594e-05	0	3.24959e-05	0	0	0	0	0	0	0	4.97868e-05	0	0	0	0	0	0	0	0	0	0	0	5.52981e-05	0	0	0	0	0	0	0	0	0
Peptidyl-tRNA hydrolase ICT1, mitochondrial	ICT1	Q14197	5			0	0	0	0	0	0	0	0	0	0	0	0	0	0	0	0	0	0	0	0	0	0	1.30699e-05	0	0	0	0	0	2.92071e-05	2.03442e-05	0	0	2.35367e-05	0	0
Insulin-degrading enzyme	IDE	P14735	1			0	0	0	0	0	0	0	0	0	0	0	0	0	0	0	0	0	0	0	0	0	0	0	1.33788e-06	0	0	0	0	0	0	0	0	0	3.25061e-07	0
Isocitrate dehydrogenase [NADP] cytoplasmic	IDH1	O75874	24			0	0.000686924	6.24476e-05	0.000396657	0.00051774	0.000456583	8.44145e-05	0.000429419	7.09612e-05	0	0.000131526	6.36492e-05	0	0.000209378	0	0.000249	5.51519e-05	0.000222454	0.000140657	0	0.000283156	3.91831e-05	0.000331026	0.000151948	0	0.000116951	0.000103346	3.72837e-05	3.00542e-05	0.000172956	0.00037255	8.31443e-05	0.000174544	0.00052	0.000199922
Isocitrate dehydrogenase [NADP], mitochondrial	IDH2	P48735	21			0	0.000229844	7.64342e-05	0.000273246	5.20175e-05	0.000501951	0.00014692	0.000312692	0.000132614	0	0.000523864	0	0	0.000404256	0	0.000357848	0.000160953	0.000381009	0.000349997	0	0.000231819	0	0.000902028	0.0005853	0	0.0013999	7.80031e-05	0	0.000618729	0.00056912	0.000159201	5.21241e-05	0.000235589	0.000594033	0.000597112
Isocitrate dehydrogenase [NAD] subunit alpha, mitochondrial	IDH3A	P50213	20			0	7.08518e-05	0	0	0	0.000432563	0.000128408	2.62615e-05	0	0	6.61142e-05	0	0	0.000205638	0	0.000208886	0	0.000144962	1.67481e-05	0	3.46825e-05	0	0.000164876	7.14551e-05	0	0.000300679	0	0	8.63101e-05	7.45374e-05	8.89385e-05	0	0.000175833	8.99267e-05	0.00019361
Isocitrate dehydrogenase [NAD] subunit beta, mitochondrial	IDH3B	O43837	7			0	0	0	0	0	0	0	3.32804e-05	0	0	1.61007e-05	0	0	0	0	0	0	0	0	0	0	0	0	3.52845e-07	0	1.03753e-05	0	0	1.91953e-05	0	0	0	7.06903e-06	0	0
Isocitrate dehydrogenase [NAD] subunit gamma, mitochondrial	IDH3G	P51553	3			0	0	0	1.75411e-05	0	0	0	0	0	0	0	0	0	0	0	0	0	0	0	0	2.70479e-05	0	0	5.57875e-06	0	0	0	0	0	2.17332e-05	0	0	0	0	0
Gamma-interferon-inducible protein 16	IFI16	Q16666	3			0	0	0	0	0	0	0	0	0	0	0	0	0	0	0	0	0	0	0	0	0	0	9.86146e-06	9.94177e-06	0	0	0	0	0	0	0	0	0	0	0
Gamma-interferon-inducible lysosomal thiol reductase	IFI30	P13284	2			0	2.64291e-05	0	0	0	0	0	0	0	0	0	0	0	0	0	0	0	0	0	0	0	0	0	5.64119e-06	0	2.06441e-05	0	0	0	0	0	0	0	0	5.30739e-06
Interferon-induced 35 kDa protein	IFI35	P80217	1			0	0	0	0	0	0	0	0	0	0	0	0	0	0	0	0	0	0	0	0	9.74919e-07	0	0	7.32103e-07	0	0	0	0	0	0	0	0	0	0	0
Immunoglobulin-binding protein 1	IGBP1	P78318	2			0	0	0	0	0	0	0	0	0	0	0	0	0	0	0	0	0	0	0	0	0	0	0	0	0	0	0	0	0	0	0	0	2.37913e-05	0	0
Insulin-like growth factor 2 mRNA-binding protein 2	IGF2BP2	Q9Y6M1	4			0	0	0	0	0	2.45383e-05	0	5.86715e-05	0	0	4.80057e-05	0	0	0	0	0	0	2.08319e-05	0	0	0	0	0	0	0	0	0	0	0	3.48863e-05	0	0	0	0	0
Insulin-like growth factor-binding protein 2	IGFBP2	P18065	2			0	1.16968e-05	0	0	0	0	0	0	0	0	0	0	1.26567e-05	8.4971e-06	0	0	0	0	0	0	0	0	0	0	0	0	0	0	0	9.43185e-06	0	0	0	0	0
Ig alpha-1 chain C region	IGHA1	P01876	15			0.00915192	0.0036034	0.00209825	0.00304162	0.00430657	0.00203452	0.00619905	0.00207059	0.00251575	0.000580299	0.00258073	0.00259272	0.00467241	0.00242306	0.00140129	0.0198686	0.00719159	0.00372589	0.00195764	0.00902744	0.00216491	0.00254369	0.00260999	0.0048159	0.00541819	0.00217968	0.00325668	0.00247586	0.00174873	0.0029682	0.00231141	0.00505021	0.00305011	0.00478954	0.00186589
Ig alpha-2 chain C region	IGHA2	P01877	11			0	2.37342e-05	0	0	0	0.000118093	8.94858e-05	4.21456e-05	0	0	0.000214689	0	0	0.000210626	0	0.000286113	0	0.00020325	2.32335e-05	0	0.000118878	3.73608e-05	8.91083e-05	0.000394504	0	0.000153044	0	0	0.000170974	0.00033831	4.46309e-05	0	6.28543e-05	0.000399571	8.73803e-05
Ig gamma-1 chain C region	IGHG1	P01857	22	Immunoglobulin	Immunoglobulin	0.00191188	0.00395598	0.000501247	0.000696673	0.00169082	0.00109969	0.00477667	0.00113168	0.000562992	0	0.0115298	0.00045576	0.000821063	0.000625866	0	0.00140925	0.00114075	0.000787582	0.00917837	0	0.0199523	0.0205543	0.00944087	0.022796	0.00147377	0.00147421	0.000572357	0.00785618	0.00500184	0.00477159	0.0095454	0.0006355	4.45536e-05	0.0138503	0.0105101
Ig gamma-2 chain C region	IGHG2	P01859	18			0	0.000329504	0	9.80983e-05	0.000899363	0.000466948	0.000816314	2.67385e-05	8.92047e-05	0	0.00192936	0.000194837	0	0.000320819	0	5.1078e-05	0	6.93655e-05	0.000597643	0	0.00135838	0.000840114	0.000991859	0.00445304	0.000835833	0.000128302	0	0.000102008	0.000305761	0.00109019	0.000393976	3.36378e-05	0	0.00109481	0.000292066
Ig gamma-3 chain C region	IGHG3	P01860	20	Immunoglobulin	Immunoglobulin	0	0	0	0	7.73478e-05	4.96391e-05	0	0	0	0	0.00218125	0	0	0.000155203	0	0	0	3.26843e-05	0.00153081	0	0.00242601	0.00278131	0.00267786	0.00376698	0	9.78773e-05	4.29923e-05	0.00094052	0.00102017	0.000406755	0.00222313	0	0	0.000985801	0.00116877
Ig gamma-4 chain C region	IGHG4	P01861	13			0	5.38152e-05	0	0	0	0	0	0	0	0	0	0	0	0	0	0	0	0	0.000130482	0	0.00102818	0.000257731	0.000151481	0.000141301	0	0	0	0	0	0	5.59057e-05	0	0	0	4.77558e-05
Ig mu chain C region;Ig mu heavy chain disease protein	IGHM	P01871;P04220	20	Immunoglobulin	Immunoglobulin	0.00034928	0.000489764	0	0.000114899	0.000464789	0.000232041	0.000852239	0	0.000206592	0	0.000740718	0	0.000304812	6.53266e-05	0	0.000301934	0.000165099	0.000245884	0.000466606	0	0.00214418	0.00285832	0.00111053	0.00136244	0.000382227	3.83597e-05	0.000107839	0.00122389	0.000431866	0.000618302	0.000596238	0.000125136	0	0.000949255	0.00109207
Ig heavy chain V-I region V35	IGHV1-18	A0A0C4DH31;P23083	1			0	0	0	0	0	0	0	0	0	0	0	0	0	0	0	0	0	0	0	0	0	0	0	0	0	0	0	0	0	1.83779e-05	0	0	0	0	0
	IGHV3-15	A0A0B4J1V0	5		Immunoglobulin	0	0	0	0	0	0	0	0	0	0	6.21796e-05	0	0	0	0	0	0	0	1.90229e-05	0	0.000171605	5.79654e-05	0.000177852	0.000134579	0	0	0	0	3.59684e-05	0	0	0	0	9.59809e-05	0.00011017
Ig heavy chain V-III region JON;Ig heavy chain V-III region WEA;Ig heavy chain V-III region TRO;Ig heavy chain V-III region DOB	IGHV3-21	P01780;A0A0B4J1V1;P01763;P01762;P01782	6	Immunoglobulin	Immunoglobulin	4.37046e-05	8.50104e-05	0	0	0	0	0.000228811	2.86422e-05	0	0	6.80542e-05	0	0	0	0	5.76498e-05	0	3.79885e-05	6.44518e-05	0	0.000578026	0.000166413	0.000134251	0.000409384	7.46597e-05	0	0	0	0.000210342	7.91116e-05	7.0411e-05	2.76921e-05	0	0.000156077	0.000122292
Ig heavy chain V-III region BUT;Ig heavy chain V-III region KOL	IGHV3-66	A0A0C4DH42;P01767;P01772	5			0	0	0	0	0	0	0	0	0	0	9.07514e-05	0	0	0	0	0	0	0	0	0	6.05534e-05	0	0.000526644	0.000149354	0	7.21584e-05	0	0	0	0	0	0	0	0.000107759	0.000260915
	IGHV3-74	A0A0B4J1X5	5			0	0	0	0	0	0	0	0	0	0	0	0	0	0	0	0	0	0	0	0	0	0	0	0	0	0	0	0	0	0	0	0	0	0	0
	IGHV4-28	A0A0C4DH34	1			0	0	0	0	0	0	0	0	0	0	0	0	0	0	0	0	0	0	0	0	0	0	0	0	0	0	0	0	0	0	0	0	0	0	0
Ig heavy chain V-II region NEWM;Ig heavy chain V-II region ARH-77;Ig heavy chain V-II region WAH	IGHV4-61;IGHV4-4	A0A0C4DH41;P01825;P06331;P01824;A0A075B6R2	2			0	0	0	0	0	0	0	0	0	0	0	0	0	0	0	0	0	0	0	0	9.71143e-06	0	0	0	0	0	0	0	0	0	0	0	0	0	0
Immunoglobulin J chain	IGJ	P01591	10			0.00378922	0.000560419	0	0.00097089	0.00187307	0.000564246	0.00135078	0.00076477	0.0024511	0.000786979	0.000168481	0	0.00197857	0.000818969	0	0.00448304	0.00214928	0.000774873	0.000173646	0.00927542	0.000190911	0.000358721	0.000226195	0.000412534	0.00354148	0.000412672	0.00186383	0.000122879	0.000286592	0.00154144	0.000431321	0.00234799	0.000681674	0.000625065	0.00018476
Ig kappa chain C region	IGKC	P01834	11	Immunoglobulin	Immunoglobulin	0.000157309	0.00117778	0	7.93313e-05	0.000392737	0.00240749	0.000783688	0.000974595	0	0	0.00589124	0	0.000331965	0.000850339	0	0.000740704	0.000135392	0.000662782	0.00629939	0.000833073	0.0129676	0.0119008	0.00632459	0.010996	0	0.00509157	0.00023188	0.00262497	0.00596235	0.0032076	0.00936649	0.000311397	0.000169653	0.00701728	0.00422193
Ig kappa chain V-I region AU;Ig kappa chain V-I region AG	IGKV1-33; IGKV1D-33	P01594;P01593	1			0	0	0	0	0	0	0	0	0	0	0	0	0	0	0	0	0	0	0	0	0	0	0	0	0	0	0	0	0	0	0	0	0	0	0
Ig kappa chain V-II region RPMI 6410	IGKV2-30	P06310	3			0	5.58122e-05	0	0	0	0	5.83631e-05	0	0	0	0	0	0	0	0	0	0	0.000138925	0	0	7.01363e-06	3.86733e-05	0	7.38292e-05	0	0	0	0	0	8.82871e-05	0	0	0	0	0
Ig kappa chain V-II region FR;Ig kappa chain V-II region Cum	IGKV2D-28;IGKV2-40	A0A075B6P5;P01615;A0A087WW87;P01614	3			0	0.000275537	0	0	0	4.56176e-05	0.000384584	7.66941e-05	0	0	5.75804e-05	0	0	0	0	0.000130957	0	0.000276725	0	0	4.25196e-05	9.53345e-05	4.93259e-05	0.00011342	0	0	0	0	0	0.00014966	0	0	3.79621e-05	9.25836e-05	0
	IGKV2D-29	A0A075B6S2	2			0	0	0	0	0	0	0	0	0	0	0	0	0	0	0	0	0	0	0	0	0	0	0	2.80988e-05	0	0	0	0	0	0	0	0	0	0	0
Ig kappa chain V-III region VG	IGKV3D-11	A0A0A0MRZ8;P04433	3			0	0.000144763	0	0	0	3.61041e-05	3.21514e-05	5.3717e-05	0	0	0	0	0	0	0	0.00015009	0.000160953	0.000181444	0	0	2.62107e-05	0.000191176	0	4.77567e-05	0.00022761	0	9.39381e-05	0	0	0.000140615	0	0	0	3.90367e-05	0
	IGKV3D-20	A0A0C4DH25	2			0	5.49536e-05	0	0	0	0	0.000101312	0	0	0	0	0	0	0	0	0	0	0	0	0	0	0	0	1.08793e-05	0	0	0	0	0	0	0	0	0	5.90882e-06	0
Ig kappa chain V-III region POM	IGKV3D-7;IGKV3D-15	A0A0C4DH55;P01624;A0A087WSY6	2			0.000192609	0.000253546	0	9.92244e-05	0	7.55016e-05	0.000761154	9.41061e-05	0	0	2.3567e-05	0	0	8.53441e-05	0	0.000383451	0.000196081	0.000159992	2.1357e-05	0	4.62498e-05	5.09979e-05	4.14304e-05	0.000167354	0	0	0	0	0	0.000139094	0	0.000156988	0	5.58432e-05	3.16515e-05
Ig kappa chain V-IV region	IGKV4-1	P06312	1			0	0	0	0	0	0	0	0	0	0	0	0	0	0	0	0	0	0	0	0	0	0	0	1.78417e-05	0	0	0	0	0	0	0	0	0	0	0
Ig lambda-2 chain C regions	IGLC2	P0CG05	10	Immunoglobulin	Immunoglobulin	0.00134068	0.00231745	0.000574138	0.00107815	0.00163329	0.00134212	0.00296442	0.00142006	0	0	0.00427335	0	0.00138865	0.00206408	0.00109114	0.00270812	0.00387543	0.00216011	0.00802885	0.00393481	0.00902694	0.0102025	0.0065417	0.00555793	0.00153931	0.00228382	0.00143365	0.00759141	0.00347332	0.00367417	0.00891577	0.00279833	0.000220227	0.00613566	0.00462855
Ig lambda-3 chain C regions	IGLC3	P0CG06	8			0	0.000204156	0	0	7.27351e-05	4.50528e-05	0.000226817	8.66541e-05	0	0	0	0	0.000113599	0	0	0.000117333	0	8.82863e-05	0	0	0	0	0	0	0	0	0	0	0	0.000173201	0	8.29466e-05	2.81832e-05	0	0
Ig lambda-7 chain C region	IGLC7	A0M8Q6	4			0	0	0	0	0	0	0	0	0	0	0	0	0	0	0	0	0	0	0	0	0	0.000540247	0	2.80032e-05	0	0	0	0	0	0	0	0	0	0	0
Immunoglobulin lambda-like polypeptide 5;Ig lambda-1 chain C regions	IGLL5;IGLC1	B9A064;P0CG04	9	Immunoglobulin	Immunoglobulin	0	0.000407034	0	0	0.000114914	1.90104e-05	0.000377204	2.57449e-05	0	0	0.000809376	0	0	0	0	0.000188518	0	0.000212212	0.000592525	0	0.00137525	0.00183245	0.000699237	0.00167897	0	0.000606356	0	0.000892327	0.000446726	0	0.00127451	0.000162586	0	0.00151541	0.000714637
Ig lambda chain V-I region HA	IGLV1-47	P01700	1			0	6.62238e-05	0	0	0	0	0	1.71448e-05	0	0	0	0	0	0	0	0	0	0	0	0	0	0	0	0	0	0	0	0	0	0	0	3.50626e-05	0	0	0
Ig lambda chain V-I region NEW	IGLV1-51	P01701	2			0	0	0	0	0	0	0	0	0	0	0	0	0	0	0	0	0	0	0	0	1.78771e-05	0	2.01139e-05	3.6885e-05	0	0	0	0	0	0	0	0	0	0	0
Ig lambda chain V-II region MGC;Ig lambda chain V-II region BOH	IGLV2-8; IGLV2-11	P01709;P01706	1			0	0	0	0	0	0	0	0	0	0	4.55338e-05	0	0	0	0	0	0	0	0	0	9.4664e-05	0.000163219	4.184e-05	0.000139636	0	0	0	0	0	0	0	0	0	9.72096e-05	6.29538e-05
Ig lambda chain V-IV region Hil;Ig lambda chain V-IV region Bau	IGLV3-10	A0A075B6K4;P01717;P01715	2			0	0	0	0	0	0	0	0	0	0	1.1191e-05	0	0	0	0	0	0	0	0	0	4.60233e-05	0.000106037	2.67304e-05	0	0	0	0	0	2.66085e-05	0	0	0	0	5.63683e-05	0
Ig lambda chain V-III region LOI	IGLV3-12	P80748;A0A075B6K2	2			0	3.38798e-05	0	2.86269e-05	3.55603e-05	0	6.6877e-05	0	0	0	0	0	3.55102e-05	0	0	6.63441e-05	6.32241e-05	0	0	0	0	0	0	0	0	0	0	0	0	0	0	6.98852e-05	0	0	2.91736e-05
	IGLV8-61	A0A075B6I0	1			0	0	0	0	0	0	0	0	0	0	0	0	0	0	0	0	0	0	0	0	0	2.58574e-05	1.34623e-05	0	0	0	0	0	0	0	0	0	0	0	0
Ig kappa chain V-III region B6	IKV3-20	P01619	2			0.000179926	0.000259868	0.000155356	0	0.000301789	4.26007e-05	0	8.60665e-05	0.000168442	0	0	0	0	0	0	0.000271709	0.000332169	0	0	0	0	0	0	0	0	0	0.000125491	0	0	0.000169065	0	0	0.000215114	0	0
Interleukin-18	IL18	Q14116	5			0	3.1425e-05	0	0	0	2.1828e-05	0	0	0	0	1.71917e-05	0	0	0	0	1.29065e-05	0	0	3.03681e-05	0	1.38577e-05	0	1.23347e-05	0	0	3.62309e-05	0	0	0	0	2.53012e-05	0	0	2.7176e-05	1.94589e-05
Interleukin enhancer-binding factor 2	ILF2	Q12905	4			0	0	0	0	0	6.29731e-05	0	5.41637e-05	0	0	0	0	0	0	0	0	0	0	0	0	0	0	0	0	0	0	0	0	0	0	0	0	1.33404e-05	0	0
Interleukin enhancer-binding factor 3	ILF3	Q12906	21			6.46575e-05	0.000162634	0	0	0	0.000264291	0.000108702	0.000117113	0	0	4.17395e-05	0	6.11654e-05	0	0	0.00013057	0	7.71033e-05	7.12294e-05	0	6.69051e-05	7.71698e-06	0.000173343	8.66052e-05	0	0.000168824	0.000160978	0	5.20264e-05	6.69159e-05	4.88751e-05	9.856e-06	0.000337879	0.000165996	2.96173e-05
MICOS complex subunit MIC60	IMMT	Q16891	47			0.00025012	0.000297632	0.00114174	0.00139591	0.000291475	0.000938612	0.000579984	0.000262396	0.00027703	0.000142146	0.000329874	0.00096746	0.000510183	0.00107941	0.000270848	0.00201834	0.00111614	0.000802737	0.000162876	0.00025477	0.00037251	0	0.000621666	0.000258963	0.000874953	0.00138312	0.000600002	0	0.000714316	0.000429343	0.000293393	0.000760677	0.000558951	0.000336944	0.000295559
Inositol monophosphatase 1	IMPA1	P29218	6			0	0	0	0	0	4.78486e-05	0	0	0	0	1.52442e-05	0	0	4.01392e-05	0	0	0	0	1.49765e-05	0	1.35404e-05	0	4.26729e-05	0	0	0	0	0	0	1.65019e-05	3.68522e-05	0	4.20127e-05	5.05177e-05	3.1012e-05
Inosine-5-monophosphate dehydrogenase 2	IMPDH2	P12268	3			0	0	0	0	0	0	0	0	0	0	0	0	0	0	0	0	0	0	0	0	0	0	0	0	0	0	0	0	0	0	0	0	2.23418e-05	0	0
Immortalization up-regulated protein	IMUP	Q9GZP8	3			0	0	0	0.000249116	0	4.76776e-05	0	0	0	0	1.21586e-05	0.000511837	0	9.98209e-05	0	0	0.000207225	0	0.000184668	0	1.48001e-05	0.000101715	5.0145e-05	0	0	0.000109043	0	0	8.87694e-05	0	0.000113398	0	0	0.000125732	7.13811e-05
Inverted formin-2	INF2	Q27J81	3			0	0	0	0	0	2.03464e-05	0	1.50877e-05	0	0	0	0	0	0	0	2.92814e-05	0	0	1.39143e-05	0	8.12633e-06	0	0	9.02563e-06	0	1.91363e-05	0	0	0	0	0	0	0	1.94551e-05	0
Insulin-like peptide INSL5;Insulin-like peptide INSL5 B chain;Insulin-like peptide INSL5 A chain	INSL5	Q9Y5Q6	1			0	2.19911e-05	0	4.26899e-05	0	3.16381e-05	0	3.73487e-05	0	0	0	0	0	0	0	0	0	0	0	0	0	0	0	0	0	1.40807e-05	0	0	0	3.41029e-05	0	0	3.43499e-05	0	0
Ras GTPase-activating-like protein IQGAP1	IQGAP1	P46940	58			0	0.000389915	0	0.000137783	4.7004e-05	0.000392053	6.75765e-05	0.000429096	7.51119e-05	0	0.000303876	7.3067e-05	0.000150391	7.78812e-05	0	0.000291753	0.000107219	0.000268898	0.000208216	0	0.000235652	2.6822e-05	0.000551694	0.000271995	0	0.00103764	0.000236205	0	0.000128391	0.000473577	0.000243885	0	0.000258779	0.000858887	0.000465486
Ras GTPase-activating-like protein IQGAP2	IQGAP2	Q13576	13			0	1.7472e-05	0	0	0	7.89861e-05	0	0	0	0	1.06864e-05	0	0	0	0	0	0	0	5.96933e-05	0	3.93221e-05	0	5.53649e-05	1.92715e-05	0	0.000201237	0	0	5.76453e-05	0	0	0	0	3.84218e-05	7.59334e-06
Interferon regulatory factor 2-binding protein 2	IRF2BP2	Q7Z5L9	1			4.7885e-05	0	5.41337e-05	0	2.29705e-05	0	0	3.45756e-05	8.33098e-05	0	0	5.01776e-05	3.01308e-05	0	0	0	0	0	0	0	0	0	0	0	0	0	0	0	0	0	0	0	5.16343e-05	0	0
Isochorismatase domain-containing protein 2, mitochondrial	ISOC2	Q96AB3	2			0	0	0	0	0	5.48257e-05	0	0	0	0	0	0	0	0	0	0	0	0	0	0	0	0	0	0	0	0	0	0	0	0	0	0	0	0	0
IST1 homolog	IST1	P53990	6			0	4.94498e-05	0	2.37719e-05	0	0	0	3.0643e-05	0	0	0	0	0	0	0	0	0	0	0	0	1.66166e-05	0	0.00268998	0	0	0	0	0	0	0	0	0	5.82395e-05	2.92296e-05	0
Integrin alpha-1	ITGA1	P56199	4			0	0	0	0	0	0	0	0	0	0	0	0	0	0	0	0	0	0	0	0	0	0	0	0	0	0	0	0	0	0	0	0	0	0	0
Integrin alpha-3;Integrin alpha-3 heavy chain;Integrin alpha-3 light chain	ITGA3	P26006	4			0	0	0	0	0	9.6019e-05	0	0.000130671	0	0	3.95906e-05	0	0	0	0	3.22684e-05	0	3.3416e-05	0	0	1.41526e-05	0	2.47211e-05	0	0	6.81553e-05	0	0	3.00727e-05	1.71397e-05	0	0	0	2.07552e-05	5.40426e-05
Integrin alpha-5;Integrin alpha-5 heavy chain;Integrin alpha-5 light chain	ITGA5	P08648	2			0	0	0	0	0	0	0	0	0	0	0	0	0	0	0	0	0	0	0	0	0	0	0	0	0	0	0	0	0	0	0	0	0	0	0
Integrin alpha-6;Integrin alpha-6 heavy chain;Integrin alpha-6 light chain;Processed integrin alpha-6	ITGA6	P23229	10			0	0	0	0	5.55789e-05	5.42714e-05	0	0.000137883	0	0	0	0	2.13151e-05	4.55932e-05	0	0.000135441	0.000114815	0.000135906	1.39246e-05	0	0	0	0	0	0	0.000141202	0.000138968	0	5.46176e-05	7.94904e-05	0	5.40292e-05	4.51336e-05	0	0
Integrin beta-1	ITGB1	P05556	12			0	1.05628e-05	0.000125141	0.000113254	0	3.95832e-05	0	4.48279e-05	0	0.000127184	2.92138e-05	0	0	0	0	0	0.000137282	4.76093e-05	0	0	0	0	1.03757e-05	0	0	0.000100667	0	0	6.96428e-05	0	0	0	3.40583e-05	4.1116e-05	1.72146e-05
Integrin beta-4	ITGB4	P16144	14			0	0	0	0	0	7.46644e-05	0	3.10605e-05	0	0	1.25267e-05	0	0	0	0	0	0	0	0	0	0	0	0	5.5945e-07	0	2.68123e-05	0	0	1.38574e-05	0	0	0	6.21992e-05	3.86271e-05	0
Inter-alpha-trypsin inhibitor heavy chain H1	ITIH1	P19827	11			0	8.24779e-05	0	0	0	0	0	0	0	0	8.86909e-06	0	0	0	0	0	0	0	0	0	4.58698e-05	2.16405e-05	2.20062e-05	0.000135566	0	0	0	0	0	0	0	0	0	3.95549e-05	4.97723e-05
Inter-alpha-trypsin inhibitor heavy chain H2	ITIH2	P19823	14			0	0.000139795	0	0	0	0	0	0	0	0	5.70806e-05	0	0	0	0	3.09212e-05	0	1.65758e-05	0	0	0.000134914	0.000103279	6.19071e-05	0.000541307	0	0	0	0	0	2.34186e-05	2.90297e-05	0	0	0.000140314	7.97542e-05
Inter-alpha-trypsin inhibitor heavy chain H4;70 kDa inter-alpha-trypsin inhibitor heavy chain H4;35 kDa inter-alpha-trypsin inhibitor heavy chain H4	ITIH4	Q14624	10			0	3.65954e-05	0	0	0	0	3.5514e-05	0	0	0	0	0	0	0	0	0	0	0	0	0	5.24657e-05	0	0	7.78122e-05	0	0	0	0	1.32311e-05	0	0	0	0	2.10713e-05	5.38279e-05
Intelectin-1	ITLN1	Q8WWA0	14			0	2.15351e-05	0	3.526e-05	0	0	1.57657e-05	2.80661e-05	0	0	0.000444664	0	4.36391e-05	0.00106833	0	3.24496e-05	0	1.43067e-05	0.000131015	0	0.000475714	6.05561e-05	0.000279929	0.000673877	0	0	0	0	0.000175624	4.12309e-05	0.00095665	6.66412e-05	0	0.000248687	0.00019938
Intelectin-2	ITLN2	Q8WWU7	5			0	0	0	0	0	0	0	0	0	0	0	0	0	0	0	0	0	0	0	0	0	0	0	0	0	0	0	0	0	0	0	0	0	0	0
Isovaleryl-CoA dehydrogenase, mitochondrial	IVD	P26440	9			0	1.81301e-05	0	2.98506e-05	3.71947e-05	8.8213e-05	2.65125e-05	0	0	0	0	0	0	3.22272e-05	0	9.1317e-05	0	8.07619e-05	0	0	0	0	6.59491e-05	6.47267e-05	0	5.55659e-05	0	0	0	3.01046e-05	0	0	2.13275e-05	0	8.60871e-06
Junction plakoglobin	JUP	P14923	27			0	0.000333546	0	0.000136668	0	0.00137248	0.000109257	0.000679875	0	0	0.000231058	0.000293453	0.000276702	0.000387356	0	0.000257473	0	0.000229751	0.000287747	0	0.000107719	0	0.000377759	0.000139366	0	0.00102244	0.000327998	0	0.000269856	0.000148062	7.59237e-05	0.000137173	0.000600493	0.000215176	9.87328e-05
Kalirin	KALRN	O60229	1			0	0	0	0	0	0	0	0	0	0	0	0	0	0	0	0	0	0	0	0	0	0	0	0	0	0	0	0	0	0	0	0	0	0	0
KN motif and ankyrin repeat domain-containing protein 2	KANK2	Q63ZY3	7			0	0	0	0	0	0	0	0	0	0.000566561	0	0	0	0	0	0	0	0	0	0	0	0	0	0	0	0	0	0	0	0	0	0	0	0	0
Lysine--tRNA ligase	KARS	Q15046	4			0	0	6.64069e-05	3.96807e-05	0	0	3.00609e-05	6.30874e-05	0	0	0	7.89984e-05	0	2.03757e-05	0	2.51434e-05	0	2.30927e-05	0	0	0	0	0	1.60507e-05	0	0	0	0	0	0	0	0	5.36268e-05	1.86496e-05	0
BTB/POZ domain-containing protein KCTD12	KCTD12	Q96CX2	7			0	3.27483e-05	0	0	0	0	1.97723e-05	1.65666e-05	0	0	0	0	0	0	0	0	0	1.2861e-05	0	0	1.8515e-06	0	0	0	0	0	0	0	0	0	0	0	5.15846e-05	4.5824e-06	0
KH domain-containing, RNA-binding, signal transduction-associated protein 1;KH domain-containing, RNA-binding, signal transduction-associated protein 2	KHDRBS1;KHDRBS2	Q07666;Q5VWX1	10			5.96454e-05	0.000105414	0.000133126	5.01771e-05	6.76198e-05	5.61451e-05	0.000100468	0.000210963	0.000196193	0	0.000161939	0.000104388	0.000110683	0	0	5.28631e-05	8.66927e-05	4.04741e-05	0.000164729	0	0.00022193	0	0.00031295	0.000172254	0	0.000393526	7.58572e-05	0	7.21318e-05	7.7903e-05	6.53147e-05	4.84847e-05	6.371e-05	0.000419588	0.000112806
Far upstream element-binding protein 2	KHSRP	Q92945	24			0.000362197	0.000236599	0.000539373	0.000357639	0.000248897	0.000232424	9.95686e-05	0.000744877	0.000682648	0	4.63208e-05	0.000459386	0.000513238	0.000168721	0.000141334	8.83108e-05	0.000516641	0.000204301	0.000203677	0	0.000207806	9.40601e-05	7.86659e-05	4.94276e-05	0.000108809	0.000167204	0.000568177	0	0.000103518	0.000247187	5.24068e-05	0.000436282	0.000643503	0.000138266	1.72606e-05
Sickle tail protein homolog	KIAA1217	Q5T5P2	2			0	0	0	0	0	3.58777e-05	0	0	0	0	0	0	0	0	0	0	0	0	0	0	0	0	0	0	0	0	0	0	0	0	0	0	0	0	0
Uncharacterized protein KIAA1522	KIAA1522	Q9P206	5			4.97308e-05	0	0	0	0	0	0	0	6.6219e-05	0	0	0	0	0	0	0	0	0	0	0	0	0	0	0	0	0	0	0	1.88962e-05	0	0	0	0	0	0
Shootin-1	KIAA1598	A0MZ66	10			0.000215877	1.07022e-05	0	7.57986e-05	0	5.29101e-06	0	3.48105e-05	0	0	0	5.70548e-05	0	0	0.000112169	0	0	0	4.06571e-05	0.000118835	2.08047e-05	2.08104e-05	1.98606e-05	8.85629e-06	0	3.21386e-05	4.81769e-05	0	0	2.49622e-05	3.55918e-05	6.04273e-05	2.39656e-05	5.39739e-06	0
Kinesin-like protein KIF13B	KIF13B	Q9NQT8	6			0	1.71636e-05	0	0	0	1.9281e-06	0	1.59373e-05	0	0	0	0	0	0	0	2.37442e-05	0	1.62406e-05	0	0	0	0	0	0	0	1.43815e-05	0	0	0	6.58555e-06	0	0	0	0	0
Kinesin-1 heavy chain	KIF5B	P33176	33			7.39594e-05	0.000115221	0	0.000124307	0	0.000173266	4.13843e-05	0.000208959	0.000100276	0	4.06589e-05	0	0.000124568	5.21515e-05	0	0.000179765	0.00017784	4.73782e-05	0.000216746	0.000267649	8.62524e-05	2.92514e-05	4.04928e-05	1.93803e-05	0	0.000246211	0.000140322	0	5.40213e-05	0.000350113	0.000192147	8.27489e-05	0.000194787	0.000106157	1.6116e-05
Kinesin light chain 4	KLC4	Q9NSK0	12			6.6193e-05	6.58507e-05	0	3.56343e-05	0	3.11169e-05	0	7.90246e-05	6.19397e-05	0	0	0	4.64321e-05	3.90436e-05	0	4.79386e-05	0	3.15143e-05	3.08089e-05	0	0	0	0	0	0	1.40635e-05	0	0	0	7.87637e-05	0	4.53665e-05	0.000149653	0	6.89468e-06
Kallikrein-1	KLK1	P06870	2			0.000148341	0.000233679	0	0	0.000472907	2.85168e-05	0	2.29822e-05	0	0	0	0	0	2.38748e-05	0	0.000343927	0	2.73061e-05	0	0	6.58109e-05	0	1.26762e-05	1.24317e-05	0	0	8.56891e-05	0	0	6.08496e-05	1.41208e-05	4.44351e-05	1.70783e-05	5.28239e-05	3.36764e-05
Plasma kallikrein;Plasma kallikrein heavy chain;Plasma kallikrein light chain;Granzyme H	KLKB1;GZMH	P03952;P20718	2			0	0	0	0	0	0	0	0	0	0	0	0	0	0	0	0	0	0	0	0	0	0	0	1.18849e-05	0	0	0	0	0	0	0	0	0	0	1.37608e-05
Kininogen-1;Kininogen-1 heavy chain;T-kinin;Bradykinin;Lysyl-bradykinin;Kininogen-1 light chain;Low molecular weight growth-promoting factor	KNG1	P01042	19			0	0.000213381	0	0	0	1.88848e-05	5.91676e-05	2.5223e-05	0	0	0.000137682	0	0	7.84518e-05	0	0	0	0	0.000126674	6.23933e-05	0.00039151	0.000311656	0.000163162	0.0011108	0.000175016	3.898e-05	0	0.000160478	7.21114e-05	1.99989e-05	0.000136786	0	0	0.00024142	0.00060654
Importin subunit alpha-3	KPNA4	O00629	1			0	1.6317e-05	0	0	0	0	0	0	0	0	0	0	2.30746e-05	0	0	0	0	0	0	0	0	0	0	0	0	0	0	0	0	0	0	0	0	0	0
Importin subunit beta-1	KPNB1	Q14974	10			0	0	0	0	0	5.76869e-05	2.70416e-05	2.46125e-05	0	0	4.51837e-07	5.54949e-05	0	3.09277e-05	0	6.40706e-05	0	6.78749e-05	0	0	1.41132e-06	0	5.34643e-05	5.17538e-07	0	2.97778e-05	0	0	0	2.54209e-05	0	0	0.00024346	2.27148e-05	0
GTPase KRas;GTPase KRas, N-terminally processed;GTPase NRas	KRAS;NRAS	P01116;P01111	6			0	0	0	5.50845e-05	0	1.80105e-05	1.00748e-05	0	0	0	0	0	0	0	0	0	0	0	0	0	0	0	2.06446e-05	1.36306e-05	0	0	0	0	1.66191e-05	0	8.49053e-06	0	7.35524e-05	1.09644e-05	7.79477e-06
Keratin, type II cytoskeletal 1	KRT1	P04264	72			0.0052639	0.0068784	0.00467996	0.000326496	0.00231786	0.00331769	0.0120239	0.0319142	0.018456	0.00480252	0.00187222	0.0501601	0.00554428	0.002117	0.0121359	0.000646523	0.00822322	0.00289423	0.0101793	0.00714741	0.00729812	0.00840659	8.36772e-05	0.000951084	0.00879815	0.00522656	0.0129983	0.025462	0.0103445	0.00299552	0.00665751	0.0257412	6.20873e-05	0.000616191	0.00111642
Keratin, type I cytoskeletal 10	KRT10	CON__P13645;P13645	40			0.0011398	0.00521896	0.000430651	0.000215672	0.000326676	0.000130616	0.00187346	0.00971651	0.00216415	0.00139426	0.000765813	0.0140756	0.00157062	0.000596426	0.00294917	0.000317032	0.00356972	0.00115703	0.000967035	0.00503	0.00327697	0.00288816	4.57216e-05	0.000492279	0.00889038	0.00245921	0.00406045	0.00493556	0.00519205	0.000825803	0.00203813	0.00978636	1.02348e-05	0.000158319	0.000480673
Keratin, type I cytoskeletal 14	KRT14	CON__P02533;P02533	36			0	0.000252181	0	0	0	1.52442e-05	0.000103071	0.00167326	0.000203366	0	0	0.000355478	3.79057e-05	0	0.000240332	0	0.000119407	1.23957e-05	0.00100927	0	7.9659e-05	0	0	0	0	0	0.000120781	0	8.72964e-05	1.83754e-05	8.51409e-05	0.000203842	0	0	0
Keratin, type I cytoskeletal 15	KRT15	CON__P19012;P19012	14			0.000131343	0.000167312	0.00019356	0.000283256	0	0	0.000143577	0	0	0	0	0	5.22131e-05	0	0	0.000236794	0	0.000190801	0	0	0	0	0	0	0.000142054	0	0.000269251	0	0	0	0	0	0.000112422	0	0
Keratin, type I cytoskeletal 16	KRT16	CON__P08779;P08779	38			0	0.000174478	0	0	4.4523e-05	7.78777e-05	7.91782e-05	0.000895566	0.000566297	0	2.30408e-05	0.000921678	0.000164931	0	0.000609725	0	0.00043682	0	0.0025687	0	2.424e-05	6.63497e-05	0	0	0	0.000141251	0.000960896	8.50267e-05	0.000164427	0	0.000290516	0.000246085	0	0	0
Keratin, type I cytoskeletal 17	KRT17	CON__Q04695;Q04695	30			0	3.65695e-05	0	0	0	0	0	0.000563993	0	0	0	0	0	0	0	0	0	0	0.000219111	0	0	0	0	0	0	0	3.2671e-05	0	0	0	0	4.3355e-05	0	0	0
Keratin, type I cytoskeletal 18	KRT18	P05783	60			0.011783	0.00935339	0.022048	0.0144897	0.0189511	0.0120463	0.00528421	0.0114462	0.015041	0.0027678	0.00455009	0.0231955	0.0108487	0.0120604	0.0162067	0.0151391	0.0125318	0.00981569	0.00659226	0.0170455	0.0079896	0.00137168	0.00564511	0.00631909	0.0109616	0.0106497	0.0168419	0.00107296	0.00855188	0.0108397	0.00517821	0.0145387	0.0101782	0.00867184	0.00658565
Keratin, type I cytoskeletal 19	KRT19	P08727	55			0.0410962	0.0289564	0.0569618	0.0398879	0.0316794	0.0344279	0.018793	0.0338419	0.0459007	0.00335062	0.00788404	0.0331476	0.0377566	0.0197336	0.0154526	0.0408318	0.0327746	0.0332005	0.0164465	0.0331512	0.0138891	0.00345063	0.0124056	0.00730978	0.0170504	0.0168005	0.0571298	0.000437228	0.0153037	0.0473319	0.00744551	0.0414989	0.0216022	0.0163759	0.00989429
Keratin, type II cytoskeletal 2 epidermal	KRT2	CON__P35908;P35908	69			0.000423294	0.00597474	0.000242577	4.28782e-05	0.000100251	3.3862e-05	0.00062685	0.00597371	0.000990537	0.000184055	0.000311143	0.00362127	0.00043516	0.000148141	0.000883958	0	0.000243521	0.000273529	0.000587171	0.00185127	0.00137212	0.00151426	0	4.35937e-05	0.00201648	0.00148195	0.00136448	0.00396569	0.0009924	0.000214923	0.000663203	0.00255853	0	1.41139e-05	0.000135331
Keratin, type I cytoskeletal 20	KRT20	CON__P35900;P35900	72			0.0184827	0.0141172	0.0228117	0.0184687	0.0196971	0.0275847	0.00973302	0.0170624	0.0297738	0.000989806	0.00658421	0.0172607	0.0174301	0.014078	0.00203401	0.0161253	0.00917951	0.0153757	0.0229949	0.0130468	0.0106474	0.00212435	0.0120697	0.00768417	0.0107648	0.0275107	0.0204759	0.00256221	0.0167245	0.0188547	0.0172561	0.0250547	0.0125797	0.0154791	0.00992768
Keratin, type I cuticular Ha1	KRT31	CON__Q9UE12;CON__Q15323;Q15323	16			0	0	0	0	0	0	0	0	0	0	0	0	0	0	0	0	0	0	0	0	0	0	0	0	0	0	0	0.00061988	0	5.93563e-05	0	0	0	0	0
Keratin, type I cuticular Ha3-I	KRT33A	CON__O76009;O76009;CON__Q6NTB9	12			0	0	0	0	0	0	0	0	0	0	0	0	0	0	0	0	0	0	0	0	0	0	0	0	0	0	0	0	0	2.61631e-05	0	0	0	0	0
Keratin, type I cuticular Ha3-II	KRT33B	CON__Q14525;Q14525	13			0	0	0	0	0	0	0	0	0	0	0	0	0	0	0	0	0	0	0	0	0	0	0	0	0	0	0	4.74871e-05	0	0	0	0	0	0	0
Keratin, type I cuticular Ha4	KRT34	CON__Q8IUT8;CON__O76011;O76011	11			0	0	0	0	0	0	0	0	0	0	0	0	0	0	0	0	0	0	0	0	0	0	0	0	0	0	0	0	0	0	0	0	0	0	0
Keratin, type II cytoskeletal 5	KRT5	CON__P13647;P13647	46			6.8585e-05	0.00152361	0.000230616	0	2.99148e-05	1.73284e-05	0.000193551	0.00286443	0.000582965	7.59534e-05	1.37541e-05	0.000859477	0.000102436	0	0	0	0.000338178	7.213e-05	0.000551262	0.000283886	0.000162896	0.000112468	0	0	4.08375e-05	5.89955e-05	0.000722121	0.000197105	0.000151768	1.41813e-05	0.000207594	0.000552243	0	0	1.15374e-05
Keratin, type II cytoskeletal 6A	KRT6A	CON__P02538;P02538	56			0	0.000437784	5.63157e-05	0	0	0	0	0.00185413	0.000596722	0	0	0.00144787	9.58514e-05	0	0.000435721	0	0.000587226	0	0.00314325	7.31634e-05	0	0	0	0	0	4.11087e-05	0.00161485	0	0.000102128	0	0.000140216	6.01892e-05	0	0	0
Keratin, type II cytoskeletal 6C	KRT6C	CON__P48668;P48668	54			0	5.48776e-05	0	0	0	0	0	0	0.000190685	0	0	0	0	0	0	0	0.000197213	0	0.000189687	0	0	0	0	0	0	0	0.000280806	0	0	0	0	0	0	0	0
Keratin, type II cytoskeletal 8	KRT8	CON__P05787;P05787	97			0.113312	0.0601914	0.139353	0.0790752	0.0891697	0.0914675	0.0336594	0.0599187	0.133348	0.0140898	0.0285634	0.105199	0.0755438	0.0517002	0.0478204	0.0867212	0.0536149	0.0574236	0.0716315	0.105822	0.048803	0.0161181	0.0403256	0.0278091	0.0368392	0.0876308	0.101869	0.00910069	0.0583028	0.0797662	0.0449679	0.0858446	0.040298	0.0485408	0.030717
Keratin, type II cytoskeletal 80	KRT80	CON__Q6KB66-1;Q6KB66	2			0	0	0	0	0	0	0	1.49979e-05	0	0	0	0	0	0	0	0	0	0	0	0	0	0	0	0	0	0	0	0	0	0	0	0	0	0	0
Keratin, type II cuticular Hb2	KRT82	CON__Q9NSB4;Q9NSB4	2			0	0	0	0	0	0	0	0	0	0	0	0	0	0	0	0	0	0	0	0	0	0	0	0	0	0	0	0	0	0	0	0	0	0	0
Keratin, type II cuticular Hb5	KRT85	CON__P78386;P78386;CON__Q61726	19			0	0	0	0	0	0	0	0	0	0	0	0	0	0	0	0	0	0	0	0	0	0	0	0	0	0	0	0.000762258	0	8.46548e-05	0	0	0	0	0
Keratin, type II cuticular Hb6;Keratin, type II cuticular Hb1	KRT86;KRT81	CON__O43790;O43790;CON__Q14533;Q14533	21			0	0	0	0	0	0	0	0	0	0	0	0	0	0	0	0	0	0	0	0	0	0	0	0	0	0	0	0.000896244	0	0.00027056	0	0	0	0	0
Keratin, type I cytoskeletal 9	KRT9	P35527;CON__P35527	39			0.00292224	8.2934e-05	0.00256398	1.71615e-05	0.00102448	0.00223386	0.0041775	0.0132174	0.012629	0.00106159	0.000991741	0.0134275	0.00267669	0.000694116	0.00791869	0	0.00223808	0.000698796	0.00449038	0.00208561	0.00382874	0.00397373	4.45046e-05	0.000450873	0.000108062	0.000612827	0.0056996	0.00621152	0.00274147	0.000761506	0.00216069	0.0122396	0	0.000242638	0.000567872
Keratin-associated protein 11-1	KRTAP11-1	Q8IUC1	2			0	0	0	0	0	0	0	0	0	0	0	0	0	0	0	0	0	0	0	0	0	0	0	0	0	0	0	0	0	3.49404e-05	0	0	0	0	0
Keratin-associated protein 2-2;Keratin-associated protein 2-1;Keratin-associated protein 2-4;Keratin-associated protein 2-3	KRTAP2-2;KRTAP2-1;KRTAP2-4;KRTAP2-3	CON__Q9BYR9;Q9BYT5;Q9BYU5;Q9BYR9;P0C7H8	1			0	0	0	0	0	0	0	0	0	0	0	0	0	0	0	0	0	0	0	0	0	0	0	0	0	0	0	0	0	0.00013175	0	0	0	0	0
Keratin-associated protein 3-1	KRTAP3-1	CON__Q9BYR8;Q9BYR8	1			0	0	0	0	0	0	0	0	0	0	0	0	0	0	0	0	0	0	0	0	0	0	0	0	0	0	0	0	0	2.00994e-05	0	0	0	0	0
Keratin-associated protein 3-2	KRTAP3-2	Q9BYR7	2			0	0	0	0	0	0	0	0	0	0	0	0	0	0	0	0	0	0	0	0	0	0	0	0	0	0	0	0.000141549	0	2.05761e-05	0	0	0	0	0
Keratin-associated protein 3-3	KRTAP3-3	Q9BYR6	2			0	0	0	0	0	0	0	0	0	0	0	0	0	0	0	0	0	0	0	0	0	0	0	0	0	0	0	0.000227471	0	5.23816e-05	0	0	0	0	0
Kinectin	KTN1	Q86UP2	59			0	0.000379861	0	0.000611745	0.000503354	0.000540675	0.000276806	0.000814157	0.000443558	0	0.000139998	0.000411166	0.000571811	0.000147657	0	0.000895009	0.000156442	0.000685182	0.000712079	0.000582595	0.000203853	0	0.000345475	0.000141096	0.000332498	0.000674234	0.00106969	0	0.000191396	0.00110126	0.000344273	0.000682677	0.000176235	0.000324836	0.000159603
Neural cell adhesion molecule L1	L1CAM	P32004	2			0	0	0	0	0	0	0	0	0	0	0	0	0	0	0	0	0	0	0	0	0	0	0	0	0	0	0	0	0	0	0	0	0	0	0
Serine beta-lactamase-like protein LACTB, mitochondrial	LACTB	P83111	3			0	0	0	0	0	0	0	0	0	0	0	0	0	0	0	3.50251e-05	0	0	0	0	0	0	3.81627e-05	0	0	4.75217e-05	0	0	0	0	3.57699e-05	0	3.13009e-05	0	0
Ladinin-1	LAD1	O00515	18			0.000765052	6.23059e-05	0.000130303	0.000276835	6.13577e-05	7.30372e-05	0	0.000410779	0.000604906	0	0	0.000206431	5.96876e-05	1.28575e-05	0.000140847	0	5.5727e-05	9.66663e-05	4.47684e-05	0.000406107	2.16274e-05	0	0	0	0	0	0.000117743	0	7.31497e-06	0.000167982	0	8.77811e-05	0.000100474	0	0
Laminin subunit alpha-4	LAMA4	Q16363	23			0	0	0	0	0	0	0	0	0	0.00112408	0	0	0	0	0	0	0	0	0	0	0	0	0	0	0	0	0	0	0	0	0	0	0	0	0
Laminin subunit alpha-5	LAMA5	O15230	7			0	0	0	0	0	0	0	0	0	0.000140957	0	0	0	0	0	0	0	0	0	0	0	0	0	0	0	0	0	0	0	0	0	0	0	0	0
Laminin subunit beta-1	LAMB1	P07942	17			0	0	0	0	0	0	0	0	0	0.000262413	0	0	0	0	0	0	0	0	0	0	0	0	0	0	0	0	0	0	0	0	0	0	0	0	0
Laminin subunit beta-2	LAMB2	P55268	33			0	0	0	0	0	0	0	0	0	0.0028094	0	0	0	0	0	0	0	0	0	0	0	0	0	0	0	0	0	0	0	0	0	0	0	0	0
Laminin subunit gamma-1	LAMC1	P11047	31			0	0	0	0	0	0	0	0	0	0.00608941	0	0	0	0	0.000849984	0	0	0	0	0	0	0	0	0	0	0	0	0	0	0	0	0	0	0	0
Laminin subunit gamma-2	LAMC2	Q13753	2			0	0	0	0	0	0	0	0	0	0	0	0	0	0	0	0	2.75938e-05	0	0	0	0	0	0	0	0	0	0	0	0	0	0	0	0	0	0
Lysosome-associated membrane glycoprotein 1	LAMP1	P11279	4			0	0	0	3.0237e-05	0.000123766	5.23683e-05	0	0	0	0	5.49524e-05	0	0.000104417	0.000106127	0	0.000137164	0.000531129	0	3.61888e-05	0.000237164	0.000109904	0	0	0	0.00023706	0.000232577	9.05382e-05	0	6.13863e-05	0.000208351	6.07965e-05	0.000271984	0	3.77392e-05	0
Lysosome-associated membrane glycoprotein 2	LAMP2	P13473	2			0	0	0	0	0	1.16843e-05	0	0	0	0	0	0	0	0	0	0	0	0	0	0	0	0	0	0	0	0	0	0	0	2.58474e-05	0	0	0	0	0
Ragulator complex protein LAMTOR1	LAMTOR1	Q6IAA8	2			0	0	0	0	0	4.97016e-06	0	0	0	0	5.70486e-06	0	0	0	0	0	0	0	0	0	1.95723e-06	0	0	5.57143e-06	0	2.43332e-05	0	0	2.46136e-05	0	1.0049e-05	0	8.24555e-06	0	0
Ragulator complex protein LAMTOR5	LAMTOR5	O43504	2			0	1.49555e-05	0	2.18929e-05	0	2.33173e-05	0	5.63179e-05	0	0	3.93053e-06	0	2.84464e-05	0	0	0	0	0	0	0	4.96594e-06	0	1.49897e-06	8.22171e-06	0	0	0	0	3.60631e-06	1.52366e-05	0	0	0	9.86484e-07	0
Cytosol aminopeptidase	LAP3	P28838	13			0	6.86734e-05	0	0	0	4.87942e-05	0	2.31283e-05	0	0	0	0	0	3.35788e-05	0	4.0711e-05	0	1.78144e-05	0	0	1.88452e-05	0	6.22299e-05	1.72327e-05	0	1.20113e-05	0	0	0	0	0	0	0	7.70883e-05	0
La-related protein 1	LARP1	Q6PKG0	1			0	0	0	0	0	0	0	0	0	0	0	0	0	0	0	0	0	0	0	0	0	0	0	0	0	0	0	0	0	0	0	0	5.48418e-06	0	0
LIM and SH3 domain protein 1	LASP1	Q14847	20			0.000270925	0.000399019	0.000513861	0.000486744	0.00025168	0.000841508	0	0.00105393	0.00129376	0	0.000460271	0.000174686	0.000387282	0.000217162	0.000348903	0	0.000188859	0.000460865	0.00120943	0.000282977	0.000576548	0.000634529	0.000292664	6.30109e-05	0	0.000340375	0.000799093	0	0.000124946	0.000560616	0.000670518	0.000965111	0.00037063	0.000170895	5.99661e-05
Lamin-B receptor	LBR	Q14739	1			4.81666e-05	0	7.9932e-05	0	0	0	0	0	0	0	0	4.74088e-05	0	0	0	0	0	0	0	0	0	0	0	0	0	0	0	0	0	0	0	0	0	0	0
Lipocalin-1	LCN1	P31025	7			0	0	0	0	0	0	2.96742e-05	7.00718e-05	0	0	0	6.42439e-05	2.01553e-05	0	0	0	0	0	0	0	0	2.83409e-05	0	0	0	0	0	0	0	0	0	0	0	0	0
Neutrophil gelatinase-associated lipocalin	LCN2	P80188	2			0	0	0	0	0	0	0	0	0	0	0	0	0	0	0	0	0	0	0	0	0	0	0	0	0	0	0	0	0	0	0	0	0	0	0
Plastin-2	LCP1	P13796	22			0	0.000153677	0	0	0	0.000160873	0.000125475	0	0	0	0.000124438	0	1.97609e-05	2.5541e-05	0	0	0	0.000283105	5.65238e-05	0	1.22052e-05	7.70188e-05	0.000447882	9.51394e-05	0	0.000152539	0	0	0	0.000294965	0.000102394	0	0	0.000237923	0.000102135
L-lactate dehydrogenase A chain	LDHA	P00338	14			0	1.2893e-05	0	0	0	8.08491e-05	0	6.179e-05	0	0	0.000109867	0	0	0	0	5.09448e-05	0	0	1.94061e-05	0	7.43204e-05	0	0.000483154	0.000124632	0	0.000606021	0	0	0	0.000147109	0.000218223	0	0	0.00120014	0.000373815
L-lactate dehydrogenase B chain	LDHB	P07195	14			0	0.000187451	0	0	0	9.31714e-05	0	7.96989e-05	0	0	0.000220431	0	0	5.99702e-05	0	0	0	1.60356e-05	1.37012e-05	0	0.000223802	2.08197e-05	0.00028019	0.000137192	0	3.66571e-05	0	0	0	7.36844e-05	5.74319e-05	0	8.89667e-05	0.00042015	0.000131744
Probable D-lactate dehydrogenase, mitochondrial	LDHD	Q86WU2	5			0	0	0	1.56554e-05	0	0	0	1.70165e-05	0	0	1.78713e-05	0	0	0	0	0	0	8.59642e-06	0	0	0	0	0	0	0	0	0	0	1.53941e-05	0	0	0	2.56962e-05	2.11479e-05	0
Left-right determination factor 1;Left-right determination factor 2	LEFTY1;LEFTY2	O75610;O00292	1			0	0	0	0	0	0	0	0	0	0	0	0	0	0	0	0	0	0	0	0	0	0	0	0	0	0	0	0	0	0	0	0	0	0	0
LETM1 and EF-hand domain-containing protein 1, mitochondrial	LETM1	O95202	18			0	0.000111325	0	0.000195587	0.000147261	0.000213133	9.2004e-05	0.000111216	0	0	0.000233797	0	0	0.000140726	0	0.000328697	0.000424035	0.00025751	4.50888e-05	0	5.48453e-05	0	0.00010006	3.70088e-05	0.000111667	0.000381767	0.000546607	0	0.000193606	9.24734e-05	5.38426e-05	5.68104e-05	0	0.000179213	7.70603e-05
Galectin-1	LGALS1	P09382	10			0	0.00014691	0	0	0	5.34254e-05	0	1.91675e-05	0	0	0.000155388	0	0	4.09224e-05	0	0	0	0	0	0	0.000242633	0.000130159	0.000117944	0.000913561	0	0.000113437	0	0	4.99089e-05	0.000156875	3.75016e-05	0	0	1.95391e-05	0
Galectin-3	LGALS3	P17931	20			0.00175494	0.00310519	0.00175145	0.00285701	0.00124281	0.00387166	0.00394992	0.00506079	0.00249595	0	0.00117972	0.00191778	0.00241499	0.00508043	0	0.00128354	0.000959854	0.00345453	0.00387455	0.000229518	0.00149536	0.000287957	0.00435161	0.0016109	0.00188664	0.00497196	0.00100638	0	0.00509286	0.00431623	0.000588731	0.00346694	0.0105491	0.00254568	0.000640771
Galectin-3-binding protein	LGALS3BP	Q08380	9			0	8.17731e-05	8.84447e-05	0.000138773	9.91941e-05	4.70851e-05	5.69342e-05	0	0	0	4.76781e-06	0.0001368	0.000156235	0	0	4.54742e-05	0.000145226	2.75684e-05	0	0	4.19388e-05	0	0	7.26759e-05	0.000269569	0.000133919	0.000248144	0	2.86127e-05	4.9936e-05	2.32615e-05	5.03314e-05	5.70552e-06	4.17346e-05	5.42055e-05
Galectin-4	LGALS4	P56470	12			0.00262947	0.00058362	0.000864141	0.00174899	0.00137668	0.000503991	0.000381556	0.000960515	0.00132627	0.000117917	0.00218906	0.00276763	0.00241877	0.000790267	0.00184604	0.00125846	0.00149033	0.000332297	0.00191543	0.00405249	0.00241219	0.000152608	0.00173412	0.00113367	0.00266798	0.00470888	0.00176913	0.000246499	0.00452354	0.00264363	0.00194297	0.00164136	0.000468747	0.00317379	0.00230932
Galectin-7	LGALS7	P47929	6			0	8.88386e-05	0	0	0	0	0	0.00143968	0	0	0	0	0	0	0	0	0	0	0	0	0	0	0	0	0	0	0	0	0	0	0	0	0	0	0
Legumain	LGMN	Q99538	1			0	0	0	0	0	0	0	0	0	0	0	0	0	0	0	0	0	0	0	0	0	0	0	5.80096e-07	0	0	0	0	0	0	0	0	0	0	0
Phospholysine phosphohistidine inorganic pyrophosphate phosphatase	LHPP	Q9H008	2			0	3.76026e-05	0	0	0	0	0	0	0	0	1.00002e-05	0	0	0	0	0	0	0	0	0	0	0	0	0	0	0	0	0	0	0	0	0	0	0	0
LIM domain and actin-binding protein 1	LIMA1	Q9UHB6	46			0.00235104	0.000603883	0.00237157	0.00115705	0.00111203	0.000881599	0.000207926	0.00220064	0.00221307	0	0.000282038	0.00174912	0.00136871	0.000578224	0.00117586	0.00073169	0.00132976	0.000652134	0.00146835	0.00233276	0.000746394	0.00014095	0.000723605	0.000140927	0	0.00148867	0.0027079	0	0.00127331	0.00107023	0.000614541	0.000857008	0.000792818	0.000368581	0.000164559
Protein lin-7 homolog C	LIN7C	Q9NUP9	5			0.000230854	5.61059e-05	0.000245582	0.000145801	0	0.000115463	0.000103396	0	0.000164993	0	4.33359e-05	0.000159535	0.000175662	0.000102797	0.000213504	0.000195094	0.000119353	0	1.74844e-05	0.00018589	5.47096e-05	0	6.91459e-05	3.40581e-05	0	9.79688e-05	0.000234132	0	7.85792e-05	9.2427e-05	1.75559e-05	0.000135435	0.000128143	4.08115e-05	1.58718e-05
Lethal(2) giant larvae protein homolog 2	LLGL2	Q6P1M3	2			0	3.3771e-05	0	2.52678e-05	0	3.29045e-05	0	1.66877e-05	0	0	0	0	0	1.48896e-05	0	3.31312e-05	0	1.59971e-05	0	0	0	0	0	0	0	0	3.01361e-05	0	0	0	0	0	0	0	0
Protein ERGIC-53	LMAN1	P49257	5			0	0	0	0	0	0	0	0	0	0	9.96259e-06	0	0	1.63405e-05	0	0	9.11888e-05	0	0	0.000183299	0	0	0	8.51312e-06	0	9.80692e-05	6.64712e-05	0	1.22613e-05	0	0	0	0	0	0
Prelamin-A/C;Lamin-A/C	LMNA	P02545	99			0.0105243	0.00768532	0.0167721	0.00777232	0.0123534	0.0087423	0.00676914	0.00973895	0.0103229	0.0353113	0.00430234	0.0156076	0.0110939	0.00441419	0.0197294	0.00747409	0.014955	0.00768087	0.00801509	0.0144597	0.00538965	0.0021184	0.00406395	0.00452646	0.0108902	0.00640116	0.01335	0.00207656	0.00394493	0.00984005	0.00414498	0.00902927	0.00741398	0.00459305	0.00266968
Lamin-B1	LMNB1	P20700	52			0.00076835	0.000333961	0.00139241	0.000781676	0.000704738	0.00101697	0.00089206	0.00148216	0.00164023	0.00107375	0.00104916	0.00153822	0.00173268	0.000736768	0.000533483	0.00108604	0.00194681	0.00107365	0.00093319	0.00102714	0.00148475	0.000217709	0.000899413	0.000986527	0.000927613	0.000939746	0.00082919	0.000119869	0.00116582	0.00136066	0.000953033	0.000661829	0.00121254	0.000606215	0.000392965
Lamin-B2	LMNB2	Q03252	51			9.18268e-05	0.000125399	0.000176941	7.87363e-05	0.000178017	0.000391163	0.000308674	0.000622472	0.000568408	0.000774147	0.000265151	0.000567194	0.00045408	0.000198342	0.00114395	0.000322507	0.000328246	9.77395e-05	0	0.000372446	0.000181985	0	7.50176e-05	0.000254702	0	0.000161336	0.000263644	0	0.000183641	0.000441545	9.99393e-05	0.000133431	0.000312153	9.02522e-05	4.90962e-05
LIM domain only protein 7	LMO7	Q8WWI1	13			0.00015916	3.97671e-05	8.39694e-05	1.98294e-05	0	9.82476e-05	0	0	0.000156351	0	6.32752e-06	0	5.67858e-05	2.09582e-05	0	0	0	8.72309e-06	0.000144192	0	1.46997e-05	0	1.22673e-05	0	0	4.5297e-05	0	0	0	6.46095e-05	0	4.27902e-05	3.90799e-05	1.25564e-05	0
Leiomodin-1	LMOD1	P29536	7			0	0	0	0	0	0	0	0	0	0	0	0	0	0	0	0	0	0	0	0	0	1.02981e-05	0	0	0	0	0	0	0	0	0	0	0	0	0
Lon protease homolog, mitochondrial	LONP1	P36776	7			0	0	0	0	0	0	0	0	0	0	1.13124e-05	0	0	0	0	0	0	6.24166e-06	0	0	0	0	5.20215e-05	0	0	6.25969e-05	0	0	0	7.50928e-06	0	0	0	0	4.65675e-05
Lipoma-preferred partner	LPP	Q93052	15			0	0	0	0	0	0.000127904	0	0.000142893	0	0	4.05855e-05	0	0	0	0	0	0	1.53601e-05	2.31819e-05	0	6.75735e-05	0.000144119	4.74749e-05	8.19893e-05	0	7.63579e-06	0	0	2.68166e-05	7.36136e-05	0	0	0	4.13591e-05	0
Lipopolysaccharide-responsive and beige-like anchor protein	LRBA	P50851	3			0	0	0	1.56143e-05	0	1.29672e-05	0	1.46733e-05	0	0	0	0	0	0	0	0	0	1.41121e-05	0	0	0	0	0	0	0	0	0	0	0	0	0	0	1.76245e-05	0	0
Leucine-rich alpha-2-glycoprotein	LRG1	P02750	3			0	9.06352e-05	0	0	6.36087e-05	0	7.06993e-05	0	0	0	0	0	3.04906e-05	0	0	4.23926e-05	0	0	0	0	0	0	0	3.15462e-05	7.93441e-05	0	0	0	0	0	0	0	0	0	0
Alpha-2-macroglobulin receptor-associated protein	LRPAP1	P30533	6			0	0	0	0	0	0	0	0	0	0	0	0.000108394	2.27642e-05	0	0	0	0	0	0	0	0	0	0	0	0	0	0.000123222	0	2.52507e-05	0	0	0	0	0	0
Leucine-rich PPR motif-containing protein, mitochondrial	LRPPRC	P42704	22			0	0	0	6.69255e-05	0	2.28238e-05	0	7.40535e-06	0	0	0.000102224	0	0	3.59869e-05	0	0	0	3.59588e-05	0	0	2.16306e-05	0	9.88211e-05	3.75517e-05	0	0.0003005	0	0	5.05924e-05	0	0	0	1.04034e-05	3.82637e-05	5.34668e-05
Leucine-rich repeat-containing protein 16A	LRRC16A	Q5VZK9	3			0	0	0	0	0	1.74191e-05	0	0	0	0	0	0	0	0	0	0	0	2.07257e-05	0	0	0	0	0	0	0	0	0	0	0	0	0	0	2.29683e-05	0	0
Leucine-rich repeat-containing protein 47	LRRC47	Q8N1G4	7			0	0	0	0	0	6.88748e-05	0	7.5427e-05	0	0	2.76437e-05	0	0	1.49874e-05	0	0	0	5.6314e-05	0	0	0	0	9.23436e-06	1.52069e-05	0	1.78834e-05	0	0	0	4.3018e-05	0	0	7.40067e-05	3.90409e-05	0
Leucine-rich repeat-containing protein 59	LRRC59	Q96AG4	15			0	5.36407e-05	0	0.000150392	0	3.01747e-05	0	0.000165551	0	0	2.5779e-05	0	4.73754e-05	5.92326e-05	0	0	0	3.60317e-05	0.000106782	0	8.84457e-05	0	0.000234566	0.000114467	0	0.000338277	0	0	0.000126441	9.1766e-05	8.88042e-05	0	0.0002631	0.000132931	0.000113996
Leucine-rich repeat flightless-interacting protein 1	LRRFIP1	Q32MZ4	16			0.000361859	0.000159994	0.000163487	0.000182461	0.000148698	4.09175e-05	0.000110146	0.000120098	0.000236821	0	4.98657e-05	0.000308857	0.000131301	2.14518e-05	0	0.000166293	0.000113451	4.34874e-05	0.000354706	0.000735321	5.32345e-05	0.000131651	3.20349e-05	2.8483e-05	0	0.000183632	0.00040541	0	8.69472e-05	0.000338761	0.000174474	0.000205908	9.83917e-05	5.35275e-05	6.28594e-05
Leucine-rich repeat flightless-interacting protein 2	LRRFIP2	Q9Y608	9			0	0	0	0	0	1.92362e-05	0	2.1901e-05	0	0	0	0	0	0	0	0	0	1.17982e-05	0	0	0	0	0	0	0	0	3.52126e-05	0	1.81766e-05	1.88586e-05	0	0	0	8.39722e-06	0
U6 snRNA-associated Sm-like protein LSm2	LSM2	Q9Y333	2			0	0	0	0	0	0	0	0	0	0	0	0	0	0	0	0	0	0	0	0	1.40907e-05	0	0	0	0	0	0	0	0	0	0	0	0	0	0
U6 snRNA-associated Sm-like protein LSm3	LSM3	P62310	1			0	4.90317e-06	0	0	0	5.75259e-06	0	0	0	0	0	0	0	0	0	0	0	0	0	0	0	0	0	0	0	0	0	0	0	0	0	0	4.18278e-05	0	0
U6 snRNA-associated Sm-like protein LSm5	LSM5	Q9Y4Y9	2			0	0	0	0	0	0	0	1.59477e-05	0	0	1.98075e-06	0	0	0	0	0	0	0	0	0	4.36581e-06	0	0	6.3385e-06	0	0	0	0	0	0	0	0	0	1.02293e-06	0
U6 snRNA-associated Sm-like protein LSm8	LSM8	O95777	1			0	0	0	0	0	0	0	0	0	0	0	0	0	0	0	0	0	6.18577e-06	0	0	0	0	0	0	0	0	0	0	0	4.10415e-06	0	0	0	0	0
Lymphocyte-specific protein 1	LSP1	P33241	5			0	0	0	0	0	0	0	0	0	0	3.56682e-05	0	0	0	0	0	0	0	0	0	4.18448e-05	0.000130507	3.31941e-05	3.33493e-05	0	0	0	0	0	5.90174e-05	0	0	0	0	0
Lipolysis-stimulated lipoprotein receptor	LSR	Q86X29	4			2.01538e-05	0	0	5.57172e-05	0	0	0	0	0	0	0	0	1.67025e-05	0	0	0	3.86572e-05	0	0	0	0	0	0	0	0	0	8.67426e-05	0	0	0	0	0	0	0	0
Leukotriene A-4 hydrolase	LTA4H	P09960	9			0	0	0	0	0	0	0	0	0	0	1.6433e-05	0	0	0	0	0	0	0	0	0	1.60133e-05	0	2.87879e-05	1.00436e-05	0	0	0	0	0	0	0	0	0	0	0
Latent-transforming growth factor beta-binding protein 4	LTBP4	Q8N2S1	2			0	0	0	0	0	0	0	0	0	0	0	0	0	0	0	0	0	0	0	0	0	0	0	0	0	0	0	0	0	0	0	0	0	0	0
Lactotransferrin;Lactoferricin-H;Kaliocin-1;Lactoferroxin-A;Lactoferroxin-B;Lactoferroxin-C	LTF	P02788	14			0	0	0	0	0	0	0	0	0	0	0.000145335	0	0	1.3735e-05	0	0	0	1.8212e-05	0	0	0	0	0	0	0	0	0	0	0	9.77962e-06	0	0	0	0	0
Putative RNA-binding protein Luc7-like 2	LUC7L2	Q9Y383	8			0	0	0	0	0	0	0	0.000114817	0	0	0	0	0	0	0	0	0	2.66493e-05	2.85597e-05	0	3.39249e-05	2.87634e-05	2.78662e-05	0	0	0	0	0	1.95724e-05	9.23793e-05	0	0	1.51449e-05	3.09398e-05	1.09814e-05
Lumican	LUM	P51884	14			0	0.000139643	0	0	0	2.59911e-05	0.000205792	0	0	0.000810893	5.53054e-05	0	0	0	0	0	0	1.7294e-05	8.6664e-05	0	2.39556e-05	0.000219922	0.000131091	0.000116478	0	5.24241e-05	0	0	7.31367e-06	0	0.000133953	0	0	0.000351846	4.55858e-05
Leucine zipper protein 1	LUZP1	Q86V48	1			0	0	0	3.03643e-05	2.55803e-05	0	0	0	4.44594e-05	0	0	0	0	0	0	0	0	0	0	0	0	0	0	0	0	0	0	0	0	0	0	0	3.4762e-05	0	0
Latexin	LXN	Q9BS40	2			0	2.57052e-05	0	0	0	2.34547e-05	0	1.89358e-05	0	0	0	0	0	0	0	0	0	1.39726e-05	9.5351e-06	0	1.9839e-05	4.34059e-06	1.44955e-05	1.61261e-05	0	0	0	0	0	0	1.74534e-05	0	0	3.63419e-05	0
Ly6/PLAUR domain-containing protein 8	LYPD8	Q6UX82	2			0	0	0	2.18342e-05	0	4.38884e-05	0	0	0	0	0	0	0	1.18157e-05	0	0	0	2.44115e-05	0	0	0	0	0	0	0	8.95476e-05	7.11531e-05	0	0	6.42874e-05	0	2.82821e-05	0	0	0
Lysozyme C	LYZ	P61626	4			0	2.59868e-05	0	0	0	0	0	1.37872e-05	0	0	2.40659e-05	0	0	0	0	0	0	0	0	0	0	0	0	0	0	0	0	0	0	0	0	0	0	0	0
Cation-dependent mannose-6-phosphate receptor	M6PR	P20645	2			0	0	0	0	0	0	0	0	0	0	0	0	0	0	0	0	0	0	0	0	4.02428e-06	0	0	0	0	0	0	0	0	0	0	0	0	0	0
Alpha-mannosidase 2	MAN2A1	Q16706	1			0	0	0	0	0	0	0	0	0	0	6.13051e-06	0	0	0	0	0	0	0	0	0	5.24665e-06	0	1.06001e-05	0	0	4.57612e-05	0	0	1.03418e-05	0	0	0	0	6.78204e-06	1.03334e-05
Lysosomal alpha-mannosidase;Lysosomal alpha-mannosidase A peptide;Lysosomal alpha-mannosidase B peptide;Lysosomal alpha-mannosidase C peptide;Lysosomal alpha-mannosidase D peptide;Lysosomal alpha-mannosidase E peptide	MAN2B1	O00754	2			0	0	0	0	0	0	0	0	0	0	0	0	0	0	0	0	0	1.82839e-05	0	0	0	0	0	0	0	0	0	0	0	0	0	0.000131755	0	0	0
Mesencephalic astrocyte-derived neurotrophic factor	MANF	P55145	4			0	0	0	0	0	0	0	0	0	0	4.74108e-05	0	0	0	0	0	0	0	0	0	2.20885e-05	0	3.83066e-05	2.5228e-05	0	0	0	0	2.49516e-05	0	0	0	0	7.2814e-05	0
Amine oxidase [flavin-containing] A	MAOA	P21397	15			0.0001087	0.000105569	0	0.000208505	8.92277e-05	0.000534808	0	0.000299207	7.72286e-05	9.67534e-05	0.000813244	0	0.00014629	0.000655479	0.000308362	0.000628673	0.000189243	0.000282699	3.09487e-05	0.00046742	0.000291359	0	0.00104218	0.000349807	0.000401673	0.00112176	0.000584508	0	0.000549185	0.000278742	0.000301284	0	8.10747e-05	0.000784167	0.000403951
Microtubule-associated protein 4	MAP4	P27816	29			0.0002825	0	0.000295683	7.96176e-05	3.42016e-05	2.60258e-05	0	0.00028089	0.000217241	0.000394572	0.000181772	0.000124067	5.2312e-05	5.63364e-05	0	0	8.05935e-05	7.97231e-05	9.32739e-05	0	0.000135661	0.000326253	0.000115183	7.19895e-05	0	4.43822e-05	0	0	2.9822e-05	0.000237085	2.99749e-05	3.3791e-05	8.14096e-05	7.85007e-05	5.41595e-05
Ensconsin	MAP7	Q14244	9			0.00020451	5.70145e-05	0.000148419	6.51742e-05	7.43263e-05	1.41151e-05	0	6.39181e-05	4.95911e-05	0	4.6637e-05	0.000144028	0.000207837	0	0.00012468	0	0	1.24613e-05	0.000154526	0.000262119	3.25335e-05	0	0	0	0	1.24759e-05	0.000261749	0	0	3.41273e-05	0	0.000148712	3.74582e-05	1.51131e-05	2.23994e-05
Mitogen-activated protein kinase 1	MAPK1	P28482	5			0	2.90514e-05	0	0	1.85304e-05	2.04449e-05	0	5.21703e-05	0	0	0	0	0	1.00211e-05	0	0	0	2.26274e-05	0	0	0	0	0	0	0	9.61279e-06	0	0	0	2.41672e-05	0	0	0	0	0
MAPK-interacting and spindle-stabilizing protein-like	MAPK1IP1L	Q8NDC0	1			0	0	0	2.75596e-05	0	1.8096e-05	0	2.59923e-05	0	0	1.5872e-05	5.61442e-05	0	0	0	0	0	1.42942e-05	0	0	1.38931e-05	1.74194e-05	4.48763e-06	0	0	0	0	0	1.65625e-05	1.41955e-05	0	0	2.97922e-05	7.44838e-06	0
Mitogen-activated protein kinase 3	MAPK3	P27361	5			5.50218e-05	6.52668e-05	0	2.51409e-05	0	0.000110358	0	5.34749e-05	0.000153544	0	0	0	3.63727e-05	4.93659e-05	0	6.39286e-05	0	5.06954e-05	0	9.98526e-05	0	0	0	0	0	0	0	0	0	2.91756e-05	0	0	0.000153435	0	0
Microtubule-associated protein RP/EB family member 1	MAPRE1	Q15691	7			0	6.68146e-06	0	0	0	3.96929e-05	0	3.90218e-05	0	0	3.31173e-05	0	0	1.24924e-05	0	0	0	7.07342e-06	0	0	3.37016e-05	0	0	2.26767e-05	0	0	0	0	0	9.03409e-05	0	1.62896e-05	0	3.75554e-05	0
Microtubule-associated protein RP/EB family member 2	MAPRE2	Q15555	4			0	3.09707e-05	0	0	0	0	0	0	0	0	0	0	0	0	0	0	0	0	0	0	2.83357e-06	0	0	7.17842e-06	0	0	0	0	0	1.19952e-05	0	0	0	3.36057e-06	0
Myristoylated alanine-rich C-kinase substrate	MARCKS	P29966	17			0.000992426	0.000711766	0.00267852	0.000798172	0.000766134	0.000640402	0.000326771	0.000440054	0.00116702	0.000160723	0.000489545	0.00316208	0.000469846	0.000155977	0.00250667	0.000935772	0.00265658	0.000444565	0.00232808	0.00455046	0.001154	0.00107341	0.000878624	0.000440635	0.00125191	0.00186711	0.00392356	0.000119804	0.00120811	0.00101176	0.00133821	0.000710175	0.000379906	0.000691699	0.000395337
MARCKS-related protein	MARCKSL1	P49006	3			9.11633e-05	4.95482e-05	0.000404902	0.000244747	0.000181631	7.40277e-05	0.000182694	0.000100912	0.000305908	0.000229335	4.90571e-05	0.000497291	0	7.00191e-05	0	0.000124465	0	5.31102e-05	6.01556e-05	0.000286437	6.75349e-05	5.51692e-05	7.15138e-05	2.11972e-05	0	0.000124848	0.000403582	0	8.4421e-05	7.92714e-05	0.000121823	4.82061e-05	7.23923e-05	4.24403e-05	3.7693e-05
S-adenosylmethionine synthase isoform type-2	MAT2A	P31153	9			0.000128641	0.000106383	0	3.92213e-05	0.000133848	1.71226e-05	0	2.12288e-05	0	0	1.78459e-05	4.94425e-05	2.91619e-05	1.38081e-05	0	0	0	2.75892e-05	0	0	4.60313e-05	1.26935e-05	1.37541e-05	0	0	0	4.84639e-05	0	0	2.61386e-05	0	2.83926e-05	8.89192e-05	0	0
Methionine adenosyltransferase 2 subunit beta	MAT2B	Q9NZL9	3			0	6.24717e-06	0	0	0	2.92839e-05	6.08414e-05	1.19013e-05	0	0	0	0	0	0	0	2.67699e-05	0	2.62569e-05	0	0	6.99114e-06	0	0	0	0	0	0	0	0	0	0	0	9.87805e-05	0	0
Matrin-3	MATR3	P43243	6			0	0	0	0	0	1.68785e-05	0	3.06879e-05	0	0	0	0	0	0	0	1.46058e-05	0	0	0	0	0	0	0	1.29302e-05	0	0	0	0	0	0	0	0	2.93654e-05	0	0
Mitochondrial antiviral-signaling protein	MAVS	Q7Z434	4			0	0	0	0	0	3.78906e-05	0	0	7.31369e-05	0	1.02619e-05	0	0	0	0	0	0	2.74383e-05	0	0	1.04072e-05	0	1.73164e-05	2.50061e-05	0	0	0	0	3.53146e-05	3.41441e-05	0	0	9.48165e-06	0	9.29604e-06
Muscleblind-like protein 1	MBNL1	Q9NR56	1			0.00014546	0	0	0	0	4.21532e-05	0	0	0.000179655	5.87237e-05	0	9.86959e-05	0	0	0	0	0	4.18949e-05	0	0	0	3.19134e-05	0	0	0	0	0	0	0	0	0	0	0	0	0
Lysophospholipid acyltransferase 7	MBOAT7	Q96N66	3			0	0	0	0	0	0	0	0	0	0	0	0	0	0	0	0	0	0	0	0	0	0	0	0	0	0.000169768	0	0	0	0	0	0	0	0	0
Cell surface glycoprotein MUC18	MCAM	P43121	3			0	0	0	0	0	0	0	0	0	0.000173893	0	0	0	0	0	0	0	0	0	0	0	0	0	0	0	0	0	0	0	0	0	0	0	0	0
Methylcrotonoyl-CoA carboxylase subunit alpha, mitochondrial	MCCC1	Q96RQ3	9			0	0	0	0.000113834	6.35308e-05	4.03173e-05	0	3.89915e-05	0	0	2.3343e-05	6.8165e-05	3.64733e-05	5.4245e-05	0	5.43417e-05	0	2.48059e-05	0	0	0	0	4.35856e-05	5.66623e-05	0	0.000127004	0.000187536	0	5.5864e-05	6.15905e-05	3.52959e-05	4.55687e-05	0	1.37967e-05	0
Methylcrotonoyl-CoA carboxylase beta chain, mitochondrial	MCCC2	Q9HCC0	6			0	0	0	0	0	1.38834e-05	0	0	0	0	0	0	0	0	0	0	0	0	0	0	0	0	7.5582e-06	0	0	2.26351e-06	0	0	0	0	0	0	2.57173e-05	0	2.48514e-05
Calcium uniporter protein, mitochondrial	MCU	Q8NE86	2			0	0	0	0	0	0	0	0	0	0	0	0	0	0	0	0	0	0	0	0	0	0	0	0	0	0	0	0	0	2.12681e-05	0	0	0	0	0
Malate dehydrogenase, cytoplasmic	MDH1	P40925	20			8.27022e-05	0.000685715	0	6.13251e-05	6.51781e-05	0.000894452	0	0.00029377	0	0	0.000440466	0	0.000139615	0.000641117	0	0.000105513	0	0.000235517	7.35216e-05	0	0.000592953	2.15952e-05	0.000926603	0.000251886	0	0.000645606	0	0.000109974	0.000228898	0.000481102	0.000700329	0	0.00062774	0.00102434	0.000434276
Malate dehydrogenase, mitochondrial	MDH2	P40926	37			0.00178322	0.00289564	0.00649065	0.00438537	0.00521966	0.00621123	0.00703296	0.00724097	0.00788561	0.00172926	0.0036987	0.00540383	0.00582142	0.00377832	0.00368511	0.00862505	0.00817169	0.00447136	0.0025287	0.00447395	0.00292323	0.000528383	0.00370889	0.00288431	0.00590435	0.0045779	0.00380674	4.77801e-05	0.00672838	0.00421612	0.00112195	0.00512974	0.00569654	0.00206958	0.0029111
NAD-dependent malic enzyme, mitochondrial	ME2	P23368	5			0	3.37036e-05	0	5.64554e-05	0	6.88335e-05	2.67248e-05	0	0	0	9.58325e-06	0	2.63819e-05	4.60748e-05	0	0	0	2.52077e-05	0	0	0	0	8.5405e-06	6.68167e-06	0	3.84132e-06	0	0	0	3.3764e-05	0	0	0	0	1.35956e-06
Methyl-CpG-binding protein 2	MECP2	P51608	11			0	0	0	0	0	0	0	0	0	6.39179e-05	7.45264e-06	0	0	0	0	0	0	0	0	0	0	0	0	0	0	0	0	0	0	0	0	0	0	0	0
Meprin A subunit alpha	MEP1A	Q16819	6			0	7.23133e-06	0	0	0	0	0	0	0	0	0	0	0	0	0	6.1624e-05	0	0	0	0	0	0	0	0	0	7.29305e-05	0	0	0	2.13724e-05	1.18998e-05	0	0	0	3.67761e-05
LDLR chaperone MESD	MESDC2	Q14696	5			0	0	0	0	0	0	0	0	0	0	1.60763e-05	0	2.85528e-05	0	0	0	0	1.06106e-05	0	0	2.86868e-05	0	0	0	0	0	0	0	0.000118582	0	0	4.12091e-05	1.41349e-05	2.26502e-05	0
Methionine aminopeptidase 1	METAP1	P53582	3			0	0	0	0	0	1.3025e-05	0	0	0	0	0	0	0	0	0	0	0	0	0	0	0	0	0	0	0	8.15213e-06	0	0	0	0	0	0	2.74161e-05	0	0
Methionine aminopeptidase 2	METAP2	P50579	1			0	0	0	0	0	0	0	0	0	0	0	0	0	0	0	0	0	0	0	0	0	0	0	0	0	0	0	0	0	0	0	0	0	0	0
Methyltransferase-like protein 7A	METTL7A	Q9H8H3	4			0	0	0	0	0	1.31429e-05	0	0	0	0	3.47919e-05	0	0	0	0	0	0	0	0	0	1.88677e-05	0	1.4258e-05	1.21569e-05	0	7.65743e-06	0	0	3.67225e-05	2.94965e-05	0	0	0	1.44882e-05	2.87464e-06
Methyltransferase-like protein 7B	METTL7B	Q6UX53	1			0	0	0	0	0	0	0	0	0	0	0	0	0	0	0	0	0	0	0	0	0	0	0	0	0	0	0	0	0	0	0	0	0	0	0
Microfibrillar-associated protein 5	MFAP5	Q13361	1			0	0	0	0	0	0	0	0	0	0	0	0	0	0	0	0	0	0	0	0	0	0	0	0	0	0	0	0	0	0	0	0	0	0	0
Microsomal glutathione S-transferase 2	MGST2	Q99735	1			0	0	0	0	0	0	0	0	0	0	1.22057e-05	0	0	0	0	0	0	0	0	0	2.10088e-05	0	0	2.28852e-05	0	3.23037e-05	5.13377e-05	0	3.38936e-05	0	2.2944e-05	0	0	3.13473e-05	9.19043e-06
Melanoma inhibitory activity protein 3	MIA3	Q5JRA6	3			0	0	0	0	0	0	0	0	0	0	0	0	0	0	0	0	0	0	0	0	0	0	0	0	0	0	0	0	0	0	0	0	8.63202e-06	0	0
Calcium uptake protein 1, mitochondrial	MICU1	Q9BPX6	1			0	0	0	0	0	0	0	0	0	0	0	0	0	0	0	0	0	0	0	0	0	0	0	0	0	0	0	0	0	0	0	0	5.16364e-06	0	0
Macrophage migration inhibitory factor	MIF	P14174	3			3.55758e-05	8.02736e-05	0	1.50452e-05	0	0.000196248	0	0.000132623	0	0	2.63043e-05	0	1.18585e-05	5.55272e-05	0	0	0	0	0	0	2.76183e-05	2.10414e-05	6.97172e-05	3.92e-05	0	0	0	0	0	6.84815e-05	0	8.71251e-06	0.000338914	3.3875e-05	0
Mitotic interactor and substrate of PLK1	MISP	Q8IVT2	27			0.000643094	0.000121072	0.000263474	0.000244043	0.000202885	0.00054884	5.20577e-05	0.000366693	0.000766489	0	1.6802e-05	0.000134189	0.000637302	0.000381867	0	7.40127e-05	0	0.000201772	0.000137763	0	0.000122108	0	5.6988e-05	0	0	0.000110993	0.000824174	0	0.000160604	0.000178935	4.59324e-05	0.000359661	0.000206387	8.3237e-05	2.96633e-05
Malectin	MLEC	Q14165	6			0	0	0	9.4995e-05	0	5.15034e-05	0	4.60052e-05	0	0	2.60831e-05	0	0	5.05201e-05	0	6.56204e-05	0.000103929	3.79188e-05	0	0	0	0	0	1.6896e-05	0	0.000195897	0.000116417	0	4.27111e-05	6.63967e-05	0	0	2.07803e-05	0	0
Afadin	MLLT4	P55196	5			0	1.43701e-05	0	0	0	1.6487e-05	0	5.92998e-06	0	0	0	0	0	0	0	0	0	6.03724e-06	0	0	0	0	0	0	0	0	0	0	0	1.36272e-05	0	2.62615e-05	0	0	0
Melanophilin	MLPH	Q9BV36	2			0	0	0	0	0	0	0	0	0	0	0	0	0	0	0	0	0	0	0	0	0	0	0	0	0	0	0	0	0	0	0	0	0	0	0
Mannose-P-dolichol utilization defect 1 protein	MPDU1	O75352	1			0	0	0	8.95302e-05	0	0	0	0	0	0	0	0	0	7.89985e-05	0	6.51141e-05	0.000159161	0	0	0	0	0	0	0	0	0	9.06831e-05	0	0	0	0	0	0	0	0
3-mercaptopyruvate sulfurtransferase	MPST	P25325	10			0	8.26749e-05	0	4.81396e-05	0	7.63801e-05	0	7.6645e-05	0	0	0	6.22999e-05	0	3.09147e-05	0	4.01058e-05	0	0.000124748	0	0	0	0	8.97347e-05	2.89893e-06	0	0.000166872	0	0	0	2.04872e-05	0	0	5.94048e-06	4.22912e-05	2.09138e-05
39S ribosomal protein L1, mitochondrial	MRPL1	Q9BYD6	1			0	0	0	0	0	0	0	0	0	0	0	0	0	0	0	0	0	0	2.905e-05	0	0	0	0	0	0	3.57222e-05	0	0	0	0	9.54842e-06	0	0	0	0
39S ribosomal protein L11, mitochondrial	MRPL11	Q9Y3B7	5			0	0	0	0	0	4.32233e-05	0	8.82008e-05	0	0	0	0	0	3.76834e-05	0	0	0	0	0	0	0	0	0	0	0	0	0	0	0	0	0	0	0.000117916	0	0
39S ribosomal protein L12, mitochondrial	MRPL12	P52815	12			9.02522e-05	0.000131924	0	0.000302321	6.24194e-05	0.000320325	7.36472e-05	0.00038024	0.000349488	0	0.000255268	0	0.000817425	0.000100782	0	0.000276034	0.000189225	0.000575849	0.000134795	0	0.000146427	0	0.000154695	0.000108824	0.00022641	0.000806689	0.000232538	0	0.000680026	0.000229354	6.05472e-05	0.000280983	0.000398258	0.000233349	0.000295453
39S ribosomal protein L14, mitochondrial	MRPL14	Q6P1L8	2			0	0	0	0	0	1.57094e-05	0	1.18825e-05	0	0	0	0	0	0	0	0	0	0	0	0	0	0	0	0	0	0	0	0	0	0	0	0	0	0	0
39S ribosomal protein L15, mitochondrial	MRPL15	Q9P015	1			0	0	0	0	0	0	0	0	0	0	0	0	0	0	0	0	0	0	0	0	0	0	0	0	0	0	0	0	0	0	0	0	1.92167e-05	0	0
39S ribosomal protein L17, mitochondrial	MRPL17	Q9NRX2	4			0	0	0	0	0	1.15664e-05	0	0	0	0	0	0	0	0	0	0	0	7.44095e-06	0	0	0	0	0	0	0	0	0	0	0	0	0	0	1.72896e-05	0	0
39S ribosomal protein L18, mitochondrial	MRPL18	Q9H0U6	1			0	1.04644e-05	0	4.03737e-05	0	2.16995e-05	2.81238e-05	3.07004e-05	0	0	0	0	0	2.34713e-05	0	2.79573e-05	0	2.40211e-05	0	0	0	0	0	0	0	0	0	0	0	2.73073e-05	0	2.50363e-05	3.30272e-05	0	0
39S ribosomal protein L19, mitochondrial	MRPL19	P49406	1			0	0	0	0	0	1.97527e-05	0	1.82219e-05	0	0	4.3238e-06	0	0	0	0	0	0	2.05353e-05	0	0	0	0	4.46044e-06	0	0	0	0	0	0	9.59691e-06	0	0	4.37042e-05	0	0
39S ribosomal protein L2, mitochondrial	MRPL2	Q5T653	3			9.16078e-05	0	0.000111943	5.48359e-05	6.5468e-05	3.74631e-06	0	0	7.07133e-05	0	0	7.92246e-05	7.61861e-05	0	0	0	7.19748e-05	0	0	0.000101825	0	0	0	0	9.32179e-05	0	5.48898e-05	0	0	0	0	0	0	0	0
39S ribosomal protein L22, mitochondrial	MRPL22	Q9NWU5	1			0	0	0	0	0	0	0	0	0	0	0	0	0	0	0	0	0	0	0	0	0	0	1.47013e-05	0	0	1.92994e-05	0	0	0	0	0	0	0	0	1.04437e-05
39S ribosomal protein L24, mitochondrial	MRPL24	Q96A35	3			0	0	0	0	0	0	0	8.77479e-06	0	0	0	0	0	0	0	0	0	3.87338e-06	0	0	0	0	0	1.1663e-06	0	0	0	0	0	0	0	0	3.83393e-06	0	0
39S ribosomal protein L27, mitochondrial	MRPL27	Q9P0M9	2			0	0	0	0	0	0	0	3.97503e-05	0	0	0	0	0	0	0	0	0	6.92853e-06	0	0	0	0	0	0	0	0	0	0	0	0	0	0	5.65977e-05	0	0
39S ribosomal protein L39, mitochondrial	MRPL39	Q9NYK5	2			0	0	0	0	0	0	0	0	0	0	0	0	0	0	0	0	0	0	0	0	0	0	0	0	0	0	0	0	0	0	0	0	6.16235e-05	0	0
39S ribosomal protein L4, mitochondrial	MRPL4	Q9BYD3	1			0	0	0	0	0	1.76432e-05	0	1.62305e-05	0	0	0	0	0	0	0	0	0	1.12257e-05	0	0	0	0	0	0	0	0	0	0	0	0	0	0	1.93445e-05	0	0
39S ribosomal protein L40, mitochondrial	MRPL40	Q9NQ50	3			0	0	0	0	0	1.21619e-05	0	0	0	0	0	0	0	0	0	0	0	0	0	0	0	0	0	1.65953e-06	0	0	0	0	0	0	0	0	0	0	0
39S ribosomal protein L43, mitochondrial	MRPL43	Q8N983	2			0	0	0	1.94856e-05	0	4.00578e-05	2.18408e-05	6.93485e-05	0	0	0	0	0	2.4031e-05	0	0	0	4.56941e-05	0	0	0	0	0	9.28694e-06	0	2.56163e-05	0	0	1.62311e-05	4.69286e-05	0	0	4.25748e-05	0	6.49314e-06
39S ribosomal protein L44, mitochondrial	MRPL44	Q9H9J2	2			0	0	0	0	0	0	0	0	0	0	0	0	0	0	0	0	0	0	0	0	0	0	0	0	0	0	0	0	1.5547e-06	0	0	0	0	0	0
39S ribosomal protein L45, mitochondrial	MRPL45	Q9BRJ2	3			0	0	0	0	0	0	0	0	0	0	0	0	0	0	0	0	0	0	0	0	5.30128e-06	0	0	0	0	0	0	0	1.00746e-05	0	0	0	3.88612e-05	0	0
39S ribosomal protein L46, mitochondrial	MRPL46	Q9H2W6	6			0	0	0	0	0	3.04288e-05	0	4.913e-05	0	0	0	0	1.83375e-05	2.37815e-05	0	0	0	2.88154e-05	0	0	0	0	0	0	0	6.18807e-06	0	0	0	0	0	0	2.86385e-05	0	0
39S ribosomal protein L47, mitochondrial	MRPL47	Q9HD33	5			0	0	0	0	0	1.28558e-05	0	1.41734e-05	0	0	0	0	0	0	0	0	0	0	0	0	0	0	0	0	0	8.69078e-06	0	0	4.66991e-05	0	0	0	2.38758e-05	0	0
39S ribosomal protein L48, mitochondrial	MRPL48	Q96GC5	1			0	0	0	0	0	0	0	0	0	0	0	0	0	0	0	0	0	0	0	0	1.0281e-05	0	0	0	0	1.01262e-05	0	0	0	0	0	0	0	0	0
39S ribosomal protein L49, mitochondrial	MRPL49	Q13405	4			0	0	0	0	0	2.26234e-05	0	2.1282e-05	0	0	0	0	0	7.76382e-06	0	0	0	8.68187e-06	0	0	1.27563e-05	0	0	2.03983e-05	0	0	0	0	3.70439e-05	8.48931e-06	0	9.89374e-06	0	0	3.57684e-05
39S ribosomal protein L50, mitochondrial	MRPL50	Q8N5N7	2			0	0	0	0	0	7.80368e-06	0	0	0	0	0	0	0	0	0	0	0	0	0	0	0	0	0	0	0	0	0	0	0	0	0	0	0	0	0
39S ribosomal protein L53, mitochondrial	MRPL53	Q96EL3	2			0	0	0	0	0	0	0	2.90586e-05	0	0	0	0	0	0	0	0	0	0	0	0	0	0	0	0	0	0	0	0	0	0	0	0	0	0	0
39S ribosomal protein L55, mitochondrial	MRPL55	Q7Z7F7	2			0	0	0	0	0	0	0	0	0	0	0	0	0	0	0	0	0	0	0	0	0	0	0	3.17206e-06	0	0	0	0	0	0	0	0	2.48172e-06	0	0
39S ribosomal protein L9, mitochondrial	MRPL9	Q9BYD2	2			0	0	0	0	0	9.29414e-06	0	0	0	0	0	0	0	0	0	0	0	0	0	0	0	0	0	0	0	0	0	0	0	0	0	0	0	0	0
28S ribosomal protein S10, mitochondrial	MRPS10	P82664	2			0	0	0	0	0	0	0	2.24249e-05	0	0	0	0	0	0	0	0	0	0	0	0	0	0	0	0	0	0	0	0	9.3218e-06	1.50227e-05	0	0	0	0	0
28S ribosomal protein S11, mitochondrial	MRPS11	P82912	2			0	0	0	0	0	0	0	0	0	0	0	6.17968e-05	0	0	0	0	0	0	0	0	0	0	0	0	0	0	0	0	8.71069e-06	0	0	4.98057e-05	0	0	0
28S ribosomal protein S12, mitochondrial	MRPS12	O15235	2			0	0	0	0	0	1.45644e-05	0	0	0	0	0	0	0	0	0	0	0	0	0	0	0	0	0	0	0	0	0	0	0	0	0	0	0	0	0
28S ribosomal protein S17, mitochondrial	MRPS17	Q9Y2R5	2			0	0	0	0	0	0	0	0	0	0	9.99647e-06	0	0	0	0	0	0	0	0	0	0	0	0	0	0	0	0	0	0	1.6775e-05	0	0	0	0	0
28S ribosomal protein S18a, mitochondrial	MRPS18A	Q9NVS2	1			0	0	0	0	0	0	0	0	0	0	0	0	0	0	0	0	0	0	0	0	0	0	0	0	0	1.16907e-05	0	0	0	0	0	0	0	0	0
28S ribosomal protein S22, mitochondrial	MRPS22	P82650	5			0	0	0	6.12837e-05	0	0	5.46958e-05	6.0094e-05	0	0	0	0	5.73518e-05	3.51842e-05	0	2.69031e-05	0	3.55841e-05	0	0	0	0	0	0	0	2.76937e-05	0	0	3.91781e-05	2.85533e-05	0	5.07807e-05	3.93007e-05	0	0
28S ribosomal protein S23, mitochondrial	MRPS23	Q9Y3D9	4			0	9.78285e-06	0	0	2.06905e-05	0	0	3.65733e-05	0	0	0	0	3.85364e-05	0	0	0	0	3.9911e-05	0	0	0	0	2.10411e-06	0	0	0	0	0	0	1.78007e-05	0	3.37735e-05	8.9833e-05	0	0
28S ribosomal protein S25, mitochondrial	MRPS25	P82663	3			0	0	0	0	0	2.60642e-05	0	0	0	0	0	0	0	1.21357e-05	0	0	0	2.9493e-05	0	0	0	0	0	0	0	0	0	0	0	0	0	0	2.73496e-05	0	8.25885e-06
28S ribosomal protein S28, mitochondrial	MRPS28	Q9Y2Q9	4			0	0	0	0	0	0	0	0	0	0	0	0	0	0	0	0	6.52034e-05	0	0	0	0	0	0	0	0	0	0	0	4.79306e-06	0	0	0	4.79112e-05	0	0
28S ribosomal protein S31, mitochondrial	MRPS31	Q92665	8			7.93573e-05	0	0	3.14444e-05	5.1274e-05	0	0	0	0	0	0	8.56767e-05	4.98594e-05	0	0	0	0.000189439	0	0	0	1.86998e-06	0	6.13832e-06	2.70201e-06	0	0	0	0	4.45128e-05	0	0	0	5.10152e-06	0	0
28S ribosomal protein S33, mitochondrial	MRPS33	Q9Y291	1			0	0	0	0	0	0	0	1.21319e-05	0	0	0	0	0	0	0	0	0	0	0	0	0	0	0	0	0	0	0	0	0	0	0	0	0	0	0
28S ribosomal protein S36, mitochondrial	MRPS36	P82909	7			2.55465e-05	3.22577e-05	0	2.88201e-05	0.000102402	0.000301317	0.000120633	0.000201726	0.000179157	0	3.45735e-05	0	0.000264533	1.83434e-05	0	9.54022e-05	0	4.74604e-05	4.82819e-06	0	4.01601e-05	5.47416e-06	2.40376e-05	2.11859e-05	0	3.35912e-05	8.45633e-05	0	0.000136295	5.83886e-05	0	0.000190744	0.000175421	1.30931e-05	2.7714e-06
28S ribosomal protein S6, mitochondrial	MRPS6	P82932	3			0	0	0	0	0	0	0	0	0	0	0	0	0	0	0	0	0	0	0	0	0	0	9.23712e-06	0	0	1.0984e-05	0	0	4.02536e-05	0	0	0	5.71925e-05	5.13132e-06	0
28S ribosomal protein S7, mitochondrial	MRPS7	Q9Y2R9	3			0	0	0	0	0	4.12464e-06	0	0	0	0	0	0	0	0	0	0	0	0	0	0	0	0	0	0	0	0	0	0	2.1532e-05	0	0	0	0	0	0
28S ribosomal protein S9, mitochondrial	MRPS9	P82933	2			0	0	0	0	0	0	0	0	0	0	0	0	0	0	0	0	0	0	0	0	0	0	0	0	0	0	0	0	1.08206e-05	0	0	0	0	0	0
Ribosome-recycling factor, mitochondrial	MRRF	Q96E11	3			0	0	0	0	0	3.90255e-06	0	1.75206e-05	0	0	0	0	0	0	0	0	0	2.71364e-05	0	0	0	0	0	0	0	6.29941e-05	0	0	0	1.49686e-05	0	0	0	1.80651e-05	0
Moesin	MSN	P26038	48	Bacterial adhesion; actin remodelling		0	0.000612089	0	0	0	5.829e-05	0.000547507	8.78773e-05	0	0	0.00032144	0	0.000303141	0.000265129	0	8.45409e-05	0.000472893	0.00047424	1.55378e-05	0	9.31295e-05	0.000676283	0.000347072	0.000510084	0	5.85514e-05	0.00073795	0.000137119	3.39605e-05	0.000598884	0.000111587	0.000531665	0.000205288	0.000506674	0.000255534
Metallothionein-1X;Metallothionein-2;Metallothionein-1G;Metallothionein-1M;Metallothionein-1H;Metallothionein-1A	MT1X;MT2A;MT1G;MT1M;MT1H;MT1A	P80297;P02795;P13640;Q8N339;P80294;P04731	2			0	0	0	0	0	0	0	6.26532e-05	0	0	0	0	0	0	0	0	0	0	0	0	0	0	3.0502e-05	0	0	0	0	0	0	0	0	1.75737e-05	0	0	0
S-methyl-5-thioadenosine phosphorylase	MTAP	Q13126	3			0	0	0	0	0	0	0	0	0	0	1.01979e-05	0	0	0	0	0	0	0	0	0	5.58913e-06	0	0	0	0	0	0	0	0	0	0	0	0	7.63164e-06	0
Mitochondrial carrier homolog 2	MTCH2	Q9Y6C9	3			0	0	0	0	0	0	0	0	0	0	0	0	0	9.30717e-05	0	0	0	0	0	0	0	0	0	0	0	2.98559e-05	0	0	0	0	0	0	0	2.24071e-05	0
Cytochrome c oxidase subunit 2	MT-CO2	P00403	2			0	0	0	3.93154e-05	0	4.22251e-05	0	1.13022e-05	0	0	7.12357e-06	0	0	2.52958e-05	0	0	0	1.3397e-05	0	0	1.77518e-05	0	0	0	0	4.7756e-06	0	0	2.37554e-05	4.29085e-05	0	0	0	2.15307e-05	0
Protein LYRIC	MTDH	Q86UE4	2			0	0	0	0	0	1.93878e-05	0	3.82849e-05	0	0	0	0	0	0	0	0	0	0	0	0	1.06072e-05	0	1.47502e-05	0	0	0	0	0	0	4.33118e-05	0	0	0	3.53752e-05	0
C-1-tetrahydrofolate synthase, cytoplasmic;Methylenetetrahydrofolate dehydrogenase;Methenyltetrahydrofolate cyclohydrolase;Formyltetrahydrofolate synthetase;C-1-tetrahydrofolate synthase, cytoplasmic, N-terminally processed	MTHFD1	P11586	13			0	0	0	0	0	0	0	0	0	0	9.7668e-06	0	0	0	0	0	0	0	2.31131e-05	0	0	0	2.87921e-05	3.20779e-05	0	0.000139908	0	0	0	0	0	0	0.000117345	6.07422e-05	5.78528e-05
5-formyltetrahydrofolate cyclo-ligase	MTHFS	P49914	1			9.13915e-05	0	0	5.71333e-05	0	0	5.98121e-05	0	0	0	0	0.000110231	0	0	0.000159866	5.4617e-05	0.000106791	0	0	0	0	0	0	0	4.07375e-05	0	0	0	0	0	0	0	0	0	0
Translation initiation factor IF-2, mitochondrial	MTIF2	P46199	3			0	0	0	0	0	0	0	0	0	0	0	0	0	0	0	0	0	1.66549e-05	0	0	0	0	0	0	0	0	0	0	6.04315e-06	0	0	0	0	0	0
Myotrophin	MTPN	P58546	4			0	0.000119659	0	0	0	0	0	9.62133e-05	0	0	4.47243e-05	0	0	0	0	0	0	2.08382e-05	0.000135139	0	9.77972e-05	0.000129425	5.88143e-05	6.60207e-05	0	3.96271e-05	0	0	4.11192e-05	0.000105469	2.87639e-05	0	2.56064e-05	7.64949e-05	1.72323e-05
Metaxin-2	MTX2	O75431	1			0	0	0	0	0	0	0	0	0	0	0	0	0	0	0	0	0	0	0	0	0	0	1.22859e-05	0	0	0	0	0	0	0	0	0	0	0	0
Mucin-12	MUC12	Q9UKN1	24	Glycocalyx		0.000551	0.000173027	0	0.00144991	0.000274473	0.00040013	0.000439405	0.000236826	0.000574309	0.00015354	4.35957e-05	0.00100287	0.000414404	0.000150977	0.00185036	0.000235639	0.000709201	0.000121219	0.000139481	0.00430097	7.96991e-05	0	1.85045e-05	1.24368e-05	0.000996652	0.000306927	0.00111607	0	0.000457239	0.000428131	7.11069e-05	0.000325999	0.000248024	4.31581e-05	1.74659e-05
Mucin-13	MUC13	Q9H3R2	7	Glycocalyx		0	0	0	0	0	9.89728e-05	0	3.35549e-05	0	0	8.88933e-05	0	0	0	0	0	0	2.99676e-05	1.60568e-05	0	1.74473e-05	0	2.49359e-05	1.30205e-05	0	0.000113435	0	0	0.000121405	0	0	0	0	0	4.74407e-06
Mucin-2	MUC2	Q02817	108			0.0147689	0.00365384	0.0254481	0.031635	0.0116537	0.0104291	0.0108667	0.015572	0.0109334	0.00273695	0.023087	0.0141665	0.0286377	0.033581	0.0172223	0.0182052	0.0546892	0.00836295	0.00959015	0.113628	0.0166753	0.000900104	0.00714381	0.0110995	0.066813	0.0653036	0.0384865	0.00151514	0.0370773	0.0388729	0.0716385	0.0691618	0.00184602	0.0349557	0.0176972
Mucin-4;Mucin-4 alpha chain;Mucin-4 beta chain	MUC4	Q99102	2	Glycocalyx		0.000148745	0	0.000145705	0.000172003	0	0	0	0	0	0	0	0	8.57582e-05	0	0.000200839	0	0.000154516	0	0	0.000560954	0	0	0	0	0.000214179	0	5.08132e-05	0	0	0	2.35249e-05	7.50073e-05	0	0	0
Mucin-5B	MUC5B	Q9HC84	31			0	0	0	0.000142656	0	3.04624e-05	2.36325e-05	2.14229e-05	0	0	0	0	4.20876e-05	0.000344487	0	0	0.000150005	5.39023e-05	0	0.000180816	0	0	0	4.41675e-05	8.93263e-05	0.000122244	6.09422e-05	0	0	0.000131389	0.000285228	0.00018728	0	0	0
Methylmalonyl-CoA mutase, mitochondrial	MUT	P22033	4			0	0	0	0	0	1.74368e-05	0	0	0	0	4.01149e-06	0	0	0	0	0	0	0	0	0	0	0	0	0	0	5.68489e-06	0	0	0	0	0	0	0	5.46617e-06	0
Diphosphomevalonate decarboxylase	MVD	P53602	2			0	0	0	0	0	0	0	0	0	0	0	0	0	0	0	0	0	0	0	0	0	0	0	0	0	0	0	0	0	0	0	0	0	2.34305e-05	0
Major vault protein	MVP	Q14764	64			0.000841699	0.00145243	0.00241417	0.00312433	0.00149149	0.00257434	0.00126314	0.00173838	0.000998812	0	0.000922095	0.00212963	0.00115871	0.000704812	0.000423419	0.00428708	0.00131594	0.0015562	0.00120429	0.000188839	0.001675	4.36155e-05	0.00118295	0.00107606	0.000758183	0.00231662	0.00249075	0.000964009	0.00118941	0.00115639	0.000643612	0.00105843	0.0038165	0.00311309	0.00219144
Matrix-remodeling-associated protein 7	MXRA7	P84157	1			0	0	0	0	0	0	0	0	0	0	0	0	0	0	0	0	0	0	0	0	0	0	0	0	0	0	0	0	0	0	0	0	0	0	0
C-Myc-binding protein	MYCBP	Q99417	4			0	0	0	3.57767e-05	0	3.25071e-05	0	6.87787e-05	0	0	0	0	0	0	0	0	0	4.72012e-05	0	0	0	0	0	0	0	0	0	0	0	1.20587e-05	0	0.000103907	8.57888e-05	0	0
Myeloid-derived growth factor	MYDGF	Q969H8	7			0.000126876	6.29122e-05	0	0.000157239	0	0.000123647	6.77914e-05	0.000132998	0	0	7.66848e-05	0	2.50088e-05	6.86393e-05	0	0	0	8.77826e-05	0	0	6.04313e-05	0	0.000108658	4.85669e-05	0	0.000216846	8.16371e-05	0	0.000252507	0.000118131	0	0.000123281	1.72516e-05	5.9209e-05	8.53248e-05
Myosin-10	MYH10	P35580	38			0	0	0	0	0	0	0	0	0	5.32256e-05	0	0	0	0	0	0	0	0	0	0	0	0	0	0	0	0	0	0	0	0	0	0	0	0	0
Myosin-11	MYH11	P35749	192			0	0.00011045	0	0.00013022	0	0.000178678	0.000126539	0	0	0.0854608	0.000979786	0	6.85185e-05	6.67953e-06	0	9.83684e-05	0.000288357	1.062e-05	3.42558e-05	0	0.000287446	0.00380156	0.000127897	0.000222494	0	0	0	0	0.000119856	1.46232e-05	9.04975e-05	0	0	0.000191069	0.000243912
Myosin-14	MYH14	Q7Z406	215			0.0113463	0.00452779	0.0105941	0.0117118	0.00755504	0.013512	0.00618107	0.0084408	0.0156023	0.000924755	0.00248039	0.0109828	0.0130933	0.0078801	0.00983755	0.015144	0.0110785	0.00915151	0.00439104	0.0186094	0.00270704	0.000259589	0.00254563	0.00151475	0.0144846	0.00801691	0.0100521	0.000236735	0.00838414	0.00927002	0.00199153	0.00837643	0.0125628	0.00534015	0.00231463
Myosin-9	MYH9	P35579	260			0.00765208	0.00890286	0.00925484	0.016888	0.00731345	0.0232471	0.0100428	0.0177669	0.011069	0.00340004	0.00909256	0.00933669	0.0170775	0.0141696	0.0105735	0.0184996	0.0174799	0.0150999	0.0115454	0.0146776	0.00854892	0.00480634	0.0108782	0.00497736	0.01096	0.0194282	0.0136393	0.0027006	0.0147119	0.0228272	0.00802857	0.0122409	0.0164793	0.013877	0.00676961
Myosin light chain 1/3, skeletal muscle isoform;Myosin light chain 3	MYL1;MYL3	P05976;P08590	2			5.4692e-05	8.88749e-05	0	0	0	0.000173661	6.28849e-05	2.45102e-05	0	0	0	0	5.55865e-05	0	0	6.42838e-05	0	0	0	0	3.29978e-05	0	0	0	0	0	0	0	0	0.000144441	0	0	9.57452e-05	2.88788e-05	3.26439e-05
Myosin regulatory light chain 12A;Myosin regulatory light chain 12B	MYL12A;MYL12B	P19105;O14950	14			0.000352421	0.00049759	0.000115197	0.000601425	0.00034869	0.00113571	0.000417336	0.000932795	0.000303994	0.00109495	0.000283713	0	0.000462031	0.000263046	0	0.000469396	0.000226545	0.000877638	0.000118155	0.000280174	0.000363962	4.02182e-05	0.000250784	0.000256674	0	6.83695e-05	0.000448349	0	0.00035231	0.00124551	0	0.000761306	0.00101227	0.000325949	6.18706e-05
Myosin light polypeptide 6	MYL6	P60660	17			0.00513602	0.00299549	0	0.00438198	0.0036517	0.00556033	0.00354955	0.00553296	0.00480161	0.00957142	0.00196258	0.00432966	0.00493788	0.00373753	0.000886949	0.00237944	0.00288402	0.00451205	0.00184625	0.00577217	0.0026451	0.00204562	0.0014828	0.00146342	0.00467873	0.00181637	0.00592812	0.000185125	0.00376736	0.00613728	0.00111198	0.00618022	0.00484384	0.00169777	0.0016437
Myosin light chain 6B	MYL6B	P14649	5			0	0	0	0	0	0	0	0	0	0	0	0	0	0	0	0	0	0	0	0	0	0	0	0	0	0	0	0	0	0	0	0	0.000301842	0	0
Myosin regulatory light polypeptide 9	MYL9	P24844	12			0	0	0	0	0	1.4351e-05	0	0	0	0.00149561	0	0	0	0	0	0	0	0	0	0	0	2.11873e-05	0	0	0	0	0	0	0	0	0	0	0	0	0
Myosin light chain kinase, smooth muscle;Myosin light chain kinase, smooth muscle, deglutamylated form	MYLK	Q15746	22			0	4.0541e-05	0	0	0	0	0	1.3877e-05	0	0	5.07194e-05	0	0	0	0	0	0	0	2.1952e-05	0	4.23084e-05	0.000239445	3.43575e-05	2.52882e-05	0	1.26265e-05	0	0	0	1.64774e-05	0	0	0	4.16726e-05	0
Unconventional myosin-XVB	MYO15B	Q96JP2	6			4.37919e-05	0	0	0	0	1.53055e-05	0	0	0	0	0	0	0	0	0	0	0	0	0	0.000112408	0	0	0	0	0	0	5.08935e-05	0	0	0	0	0	0	0	0
Unconventional myosin-XVIIIa	MYO18A	Q92614	7			0	0	0	0	0	1.63939e-05	0	0	0	0	0	0	0	0	0	1.61293e-05	0	0	0	0	0	0	1.16429e-05	0	0	3.28437e-05	0	0	0	0	0	0	0	3.00429e-06	0
Unconventional myosin-Ia	MYO1A	Q9UBC5	8			0	1.808e-05	0	0	0	0	0	1.3757e-05	0	0	5.54296e-06	0	0	1.16205e-05	0	0	3.78253e-05	0	5.16728e-06	0.000209283	4.942e-06	0	1.71209e-06	9.12605e-06	0	4.8691e-05	6.32441e-05	0	2.62853e-05	0	0	0	0	1.63875e-05	0
Unconventional myosin-Ic	MYO1C	O00159	12			0	0	0	1.86412e-05	0	2.55837e-05	0	4.98898e-05	0	0	0	0	0	0	0	0	0	0	0	0	0	0	0	0	0	0	0	0	4.61976e-06	0	0	0	0	3.65693e-06	0
Unconventional myosin-Id	MYO1D	O94832	21			0	0	0	0	0	8.33372e-05	0	1.96434e-05	0	0	1.97313e-05	0	2.1931e-05	3.45941e-05	0	0	0	9.12414e-06	5.09332e-05	0	1.33355e-05	0	9.55927e-05	4.90028e-05	0	0.000240677	4.03002e-05	0	6.25026e-05	8.36265e-05	0	0	0	4.13423e-06	1.69845e-05
Unconventional myosin-If;Unconventional myosin-Ie	MYO1F;MYO1E	O00160;Q12965	1			0	0	0	0	0	0	0	0	0	0	0	0	0	0	0	0	0	0	0	0	0	0	0	3.61481e-07	0	0	0	0	0	0	0	0	0	0	0
Unconventional myosin-Vb;Unconventional myosin-Va	MYO5B;MYO5A	Q9ULV0;Q9Y4I1	6			0	0	0	0	0	0	0	0	0	0	8.65853e-07	0	0	0	0	0	0	0	0	9.78778e-05	9.50898e-07	0	0	1.08107e-06	0	9.76386e-05	0	0	0	0	0	0	0	0	6.08204e-05
Unconventional myosin-VI	MYO6	Q9UM54	7			0	7.50738e-06	0	0	0	2.54003e-05	0	7.23105e-06	0	0	2.50467e-05	0	0	0	0	0	0	1.9816e-05	5.43241e-06	0	0	0	5.78244e-05	0	0	4.59129e-05	0	0	2.09729e-05	2.0799e-05	4.94641e-06	0	0	4.75058e-05	0
Myoferlin	MYOF	Q9NZM1	18			0	2.48467e-05	0	0.000127042	0	2.83111e-05	0	1.5118e-05	0	0	4.52204e-05	0	0	1.13352e-05	0	2.49484e-05	5.27536e-05	1.32263e-05	9.80689e-06	0.000376865	0	0	0	0	0	0.000116864	0.000110408	0	6.19658e-05	2.17693e-05	5.05656e-05	0	1.67857e-05	0	0
Marginal zone B- and B1-cell-specific protein	MZB1	Q8WU39	4			0	9.35719e-06	0	0	0	1.03748e-05	0	0	0	0	1.11543e-05	0	0	0	0	0	0	9.27891e-06	0	0	7.96983e-06	4.16779e-06	2.41801e-05	7.00346e-06	0	0	0	0	0	1.58499e-05	0	0	2.33222e-05	1.67052e-05	0
Putative uncharacterized protein LOC400499	N/A	Q6ZTK2	1			0	0	0	0	0	3.37034e-05	0	2.5533e-05	0	0.00034177	0	0	0	0	0	0	0	0	0	0	0	0	0	0	0	0	0	0	0	0	0	0	5.17494e-05	0	0
N-alpha-acetyltransferase 10	NAA10	P41227	2			0	0	0	0	0	0	0	0	0	0	0	0	0	0	0	0	0	0	0	0	0	0	0	0	0	9.53068e-06	0	0	0	6.51455e-06	0	0	0	0	0
Nascent polypeptide-associated complex subunit alpha;Nascent polypeptide-associated complex subunit alpha, muscle-specific form	NACA	Q13765;E9PAV3	6			0.000313015	9.39364e-05	0	0.000185538	0.000102138	9.83656e-05	0	0.000159404	0	6.85826e-05	0.000128025	5.39545e-05	0.000121235	8.04498e-05	0	0.000135064	0.000263349	0.000116556	5.87321e-05	0	0.000235378	9.44919e-05	0.000120016	8.17474e-05	0	9.38965e-05	0.000281118	0	0.000158295	0.000209318	4.89271e-05	0.00019176	0.000341608	0.000138235	0
N-acetyl-D-glucosamine kinase	NAGK	Q9UJ70	4			0	0	0	0	0	0	0	0	0	0	0	0	0	0	0	0	0	0	0	0	0	0	0	0	0	0	0	0	0	0	0	0	0	0	0
Nicotinamide phosphoribosyltransferase	NAMPT	P43490	4			0	0	0	0	0	0	0	0	0	0	0	0	0	0	0	0	0	0	0	0	0	0	8.06484e-06	0	0	0	0	0	0	0	0	0	0	7.48724e-05	1.29714e-05
Sialic acid synthase	NANS	Q9NR45	23			0	0.000156044	0	0.000146554	0.000114244	0.000758318	5.69741e-05	0.000451003	0.000292912	0	0.000512531	0	0.000115341	0.000433652	0	0.000205187	0	0.000302819	0.000367285	0	0.000534755	7.84023e-05	0.000421339	0.000552136	0	0.000338724	0	0.000233504	0.000156235	0.000365897	0.000192656	0.000102936	0.000265466	0.000492953	0.000138859
Nucleosome assembly protein 1-like 1	NAP1L1	P55209	4			0	0	0	0	0	0	0	0	0	0	0	0	0	0	0	0	0	0	0	0	0	0	0	0	0	0	0	0	0	0	0	0	2.15832e-05	7.81647e-06	0
Nucleosome assembly protein 1-like 4	NAP1L4	Q99733	8			0	5.56843e-05	0	0	0	0	0	0.000112156	0	0	1.31074e-05	0	0	3.6219e-05	0	0	4.42651e-05	0	2.2053e-05	0	3.74808e-05	0	2.72137e-05	2.31856e-05	0	3.57847e-05	0	0	1.72674e-05	9.54189e-05	0	0	5.65047e-05	1.73689e-05	2.0974e-05
Alpha-soluble NSF attachment protein	NAPA	P54920	8			0	0	0	8.72366e-05	7.48933e-05	3.34439e-06	4.55598e-05	3.41373e-06	0.000130824	0	0	0	0	0	0	0	0	6.94675e-05	0	0	0	0	3.19461e-05	1.66381e-05	0	4.7544e-05	0	0	2.77657e-05	2.49712e-05	0	0	4.73174e-06	6.38088e-06	0
Gamma-soluble NSF attachment protein	NAPG	Q99747	5			0	0	0	0	0	2.1742e-05	0	0	0	0	0	0	0	0	0	0	0	0	0	0	0	0	0	0	0	0	0	0	1.48528e-05	0	0	0	4.46328e-05	0	0
Nicotinate phosphoribosyltransferase	NAPRT	Q6XQN6	5			0	3.09793e-05	0	0	3.20447e-05	7.15986e-06	0	2.95262e-05	0	0	0	0	0	0	0	0	0	0	0	0	0	0	0	0	0	0	0	0	0	0	0	0	0	1.73179e-05	0
Asparagine--tRNA ligase, cytoplasmic	NARS	O43776	1			0	0	0	0	0	0	0	0	0	0	0	0	0	0	0	0	0	0	0	0	0	0	0	0	0	0	0	0	0	0	0	0	0	0	0
Nuclear autoantigenic sperm protein	NASP	P49321	4			9.10486e-05	0	0	0	0	0	0	0	9.12558e-05	0	0	0	0	0	0	0	0.000103671	0	0	0	1.26478e-05	0	0	0	0	0	5.83226e-05	0	0	0	0	0	0	8.9202e-06	0
Neutral cholesterol ester hydrolase 1	NCEH1	Q6PIU2	2			0	0	0	0	0	0	0	0	0	0	0	0	0	0	0	3.00789e-05	0	0	0	0	0	0	0	0	0	0	0	0	1.15878e-05	0	0	0	0	0	0
Nucleolin	NCL	P19338	48			0.00218836	0.000258642	0.00186261	0.000577999	8.2315e-05	0.000477937	0.000271165	0.00163172	0.000751499	0.0002816	0.000625128	0.00188799	0.00113122	0.000267776	0.00134191	7.705e-05	0.00167301	0.000656673	0.000995204	0.000490803	0.00147439	0.00205987	0.000943812	0.000345785	0.000294218	0.00130913	0.00110893	0.000124322	0.00107276	0.000709541	0.000793267	0.000651495	0.00142162	0.00108877	0.00033051
Nicastrin	NCSTN	Q92542	1			0	0	0	3.29818e-05	0	0	0	2.14699e-05	0	0	0	0	3.01982e-05	0	0	0	0	0	0	0	0	0	0	0	0	0	0	0	0	0	0	0	0	0	0
Protein NDRG1	NDRG1	Q92597	8			0	6.28828e-05	0	7.88643e-05	4.13952e-05	0.000152772	0	0	4.74377e-05	0	0	0	4.9015e-05	9.28114e-05	0	4.59138e-05	0.00014092	0	0	0.000116916	0	0	0.000118591	1.62744e-05	0	7.14109e-05	0.00010008	0	0	4.38659e-05	1.75718e-05	5.09874e-05	1.7765e-05	3.21995e-05	0
Protein NDRG2	NDRG2	Q9UN36	4			0	0	0	0	0	8.65327e-06	0	0	0	0	0	0	0	0	0	0	0	0	0	0	2.20917e-05	0	3.59152e-05	0	0	9.35038e-05	0	0	7.29306e-06	0	2.60815e-05	0	0	5.24737e-05	2.84302e-05
NADH dehydrogenase [ubiquinone] 1 alpha subcomplex subunit 10, mitochondrial	NDUFA10	O95299	8			0	0	0	0	0	7.85498e-05	0	0	0	0	5.10921e-05	0	0	4.69123e-05	0	0	0	0	0	0	1.87834e-05	0	7.56371e-05	0	0	0.0001661	0	0	0	4.87145e-05	0	2.86514e-05	0	3.33447e-05	5.52674e-05
NADH dehydrogenase [ubiquinone] 1 alpha subcomplex subunit 12	NDUFA12	Q9UI09	4			0	2.76314e-06	0	0	0	1.15228e-05	0	1.52255e-05	0	0	3.57416e-06	0	0	0	0	0	0	0	0	0	1.3444e-06	0	1.5347e-05	4.76527e-07	0	0	0	0	0	0	0	0	4.77537e-05	0	0
NADH dehydrogenase [ubiquinone] 1 alpha subcomplex subunit 13	NDUFA13	Q9P0J0	2			0	0	0	0	0	0	0	0	0	0	0	0	0	0	0	0	0	0	0	0	0	0	0	0	0	0	0	0	0	0	0	0	0	0	0
NADH dehydrogenase [ubiquinone] 1 alpha subcomplex subunit 2	NDUFA2	O43678	8			0.000160112	4.85532e-05	0	0	0.000132759	0.000326586	0	0.000371546	0.000291889	0	2.88326e-05	0	0.000174328	0.000310752	0	0.00012065	0.000148275	0.000110759	0	0	3.47605e-05	0	0.000196692	1.84178e-05	0	0	0	0	0.000103458	0.000266025	0	2.44436e-05	0.000283247	0	0
NADH dehydrogenase [ubiquinone] 1 alpha subcomplex subunit 5	NDUFA5	Q16718	9			0	3.03574e-05	0	0	0	0.000310367	0	0.000446776	0	0	0.000117209	0	6.15607e-05	0.000117756	0	2.67277e-05	0	0.000112559	0.000147181	0	0.000136473	0	7.11283e-05	0.000118987	0	0	0	0	0.000317426	0.000204241	0	0.000306221	0.000209166	0	8.14581e-05
NADH dehydrogenase [ubiquinone] 1 alpha subcomplex subunit 6	NDUFA6	P56556	4			0	0	0	0	0	0	0	1.79453e-05	0	0	2.74075e-05	0	0	5.01035e-05	0	0	0	0	0	0	1.90091e-05	0	2.15278e-05	0	0	1.83672e-05	0	0	9.23413e-05	3.99385e-05	0	4.04304e-05	0	1.22923e-05	1.1412e-05
NADH dehydrogenase [ubiquinone] 1 alpha subcomplex subunit 7	NDUFA7	O95182	12			0	2.71045e-05	2.6364e-05	0.000157796	6.75102e-05	0.000270812	0.00020214	0.000520012	0.000503531	0	0.000212345	0	0.000670452	0.000128453	0	0	8.2061e-05	0.000187814	0.000117615	0	0.000244907	0	0.000251431	0.000137591	0.000275362	0.000350171	8.44797e-05	0	0.000536703	0.000260974	2.93475e-05	0.000389684	0.000195294	0.000150506	1.86671e-05
NADH dehydrogenase [ubiquinone] 1 alpha subcomplex subunit 8	NDUFA8	P51970	8			0	0	0	0	0	3.74802e-05	0	1.80946e-05	0	0	0.000229119	0	0	9.5738e-05	0	0	0	0	0	0	8.9466e-05	0	0.000250281	0.000135712	0	0.000139504	0	0	0.000482854	4.99167e-05	0	4.17047e-05	0	1.13913e-05	1.24192e-05
NADH dehydrogenase [ubiquinone] 1 alpha subcomplex subunit 9, mitochondrial	NDUFA9	Q16795	2			0	0	0	0	0	0	0	0	0	0	4.45342e-06	0	0	0	0	0	0	0	0	0	3.24178e-06	0	1.93794e-06	1.89291e-05	0	2.68703e-05	0	0	0	0	0	0	0	2.38779e-06	0
Acyl carrier protein, mitochondrial	NDUFAB1	O14561	2			0	0	0	0	0	0	0	0	0	0	1.13745e-06	0	0	0	0	0	0	0	0	0	3.66219e-06	0	0	2.02394e-05	0	0	0	0	1.05008e-05	0	0	0	0	0	0
Mimitin, mitochondrial	NDUFAF2	Q8N183	2			0	0	0	0	0	0	0	0	0	0	9.43264e-06	0	0	0	0	0	0	0	0	0	1.28166e-05	0	2.36934e-05	0	0	7.00297e-06	0	0	2.82282e-05	0	0	0	0	0	0
NADH dehydrogenase [ubiquinone] 1 beta subcomplex subunit 1	NDUFB1	O75438	1			0	0	0	0	0	0	0	0	0	0	0	0	0	0	0	0	0	3.27707e-05	0	0	0	0	0	0	0	0	0	0	0	0	0	0	0	0	0
NADH dehydrogenase [ubiquinone] 1 beta subcomplex subunit 10	NDUFB10	O96000	13			0	5.12447e-05	7.89167e-05	0.000214414	6.60285e-05	0.000164982	7.26979e-05	0.000197113	8.66212e-05	0	0.000230446	8.82856e-05	0.000158571	3.41407e-05	0	6.05538e-05	0.000108975	3.77845e-05	0.000195218	0	0.000259384	0	0.00022868	7.4704e-05	0	0.000322256	0.000103062	0	0.000423656	0	0.000163862	0.000152594	0.0002171	9.93153e-05	0.000141113
NADH dehydrogenase [ubiquinone] 1 beta subcomplex subunit 3	NDUFB3	O43676	2			0	0	0	0	0	0	0	0	0	0	0	0	0	0	0	0	0	0	0	0	0	0	6.81333e-05	3.70876e-05	0	1.40492e-05	0	0	1.9394e-05	0	0	0	0	0	1.37891e-05
NADH dehydrogenase [ubiquinone] 1 beta subcomplex subunit 4	NDUFB4	O95168	5			0	2.33748e-05	0	0	0	3.7423e-05	0	0.000147381	0	0	0	0	2.57302e-05	0	0	0	0	4.75187e-05	0	0	0	0	8.43173e-06	0	0	0	0	0	0	8.81415e-05	0	0	9.49644e-05	0	0
NADH dehydrogenase [ubiquinone] 1 beta subcomplex subunit 5, mitochondrial	NDUFB5	O43674	1			0	0	0	0	0	6.13517e-06	0	0	0	0	0	0	0	0	0	0	0	0	0	0	0	0	0	0	0	0	0	0	0	0	0	0	0	0	0
NADH dehydrogenase [ubiquinone] 1 beta subcomplex subunit 6	NDUFB6	O95139	4			9.82702e-05	5.28201e-05	0	0	0.000110301	7.16517e-05	0.000101237	8.08511e-05	9.25319e-05	0	0	0.00011765	0.000111986	0	0	9.36438e-05	0.000113897	5.19164e-05	0	0.000179233	0	0	1.93732e-05	0	0	0	8.16928e-05	0	0	4.93253e-05	0	5.99376e-05	0.000119173	0	0
NADH dehydrogenase [ubiquinone] 1 beta subcomplex subunit 7	NDUFB7	P17568	2			0	4.8415e-05	0	0	0	0	0	5.81559e-05	0	0	0	0	0	0	0	0	0	5.20475e-05	0	0	0	0	7.70138e-05	2.53751e-05	0	0.000207514	0	0	6.80212e-05	0	0	0	0	4.68069e-05	0
NADH dehydrogenase [ubiquinone] 1 beta subcomplex subunit 8, mitochondrial	NDUFB8	O95169	2			0	0	0	0	0	1.64009e-05	0	0	0	0	1.8645e-05	0	0	1.44876e-05	0	0	0	0	0	0	0	0	0	1.00464e-05	0	2.75375e-05	0	0	0	0	0	0	0	1.90439e-05	0
NADH dehydrogenase [ubiquinone] 1 beta subcomplex subunit 9	NDUFB9	Q9Y6M9	1			0	2.35182e-05	0	2.43496e-05	0	3.5113e-05	0	4.09025e-05	0	0	2.46297e-05	0	0	0	0	0	0	5.60621e-05	0	0	1.00529e-05	0	2.05462e-05	0	0	3.61238e-06	0	0	1.46264e-05	8.58737e-06	0	0	0.000117039	1.15908e-05	5.47813e-06
NADH dehydrogenase [ubiquinone] 1 subunit C2;NADH dehydrogenase [ubiquinone] 1 subunit C2, isoform 2	NDUFC2;NDUFC2-KCTD14	O95298;E9PQ53	3			0	0	0	0	0	2.88039e-05	0	0	0	0	4.68262e-05	0	0	0	0	0	0	0	0	0	0	0	3.85895e-05	0	0	0	0	0	0	0	0	0	1.32284e-05	0	0
NADH-ubiquinone oxidoreductase 75 kDa subunit, mitochondrial	NDUFS1	P28331	31			6.4269e-05	7.87793e-05	0.000256966	0.00051371	0.000267271	0.000287379	0.000355655	0.000297579	0.000257765	0	0.00016626	0.000497194	0.000119416	0.000596708	0.000132128	0.00050967	0.000364711	0.000282148	7.37861e-05	0.000179928	9.74517e-05	0	0.0003285	0.000131006	0.000310507	0.000389555	0.000477377	0	0.000177687	0.000180867	7.0674e-05	0.000476625	0.000282296	8.37464e-05	0.000176205
NADH dehydrogenase [ubiquinone] iron-sulfur protein 3, mitochondrial	NDUFS3	O75489	9			2.9547e-05	3.02659e-05	0	0.000154042	0	0.000132125	0	0.000218999	0.000186291	0	7.00459e-06	0	0.000335567	9.61653e-05	0	0.000219711	0	7.83315e-05	0	0	7.67708e-05	0	0.000103185	3.49245e-05	0	0.00026154	0	0	9.76649e-05	0.000274851	0	0	6.29145e-05	2.08849e-05	6.24959e-05
NADH dehydrogenase [ubiquinone] iron-sulfur protein 4, mitochondrial	NDUFS4	O43181	4			0	0	0	0	0	6.45355e-05	0	8.33101e-05	0	0	7.57887e-05	0	6.98526e-05	3.0854e-05	0	0	0	3.94114e-05	0	0	0.000181366	0	5.17338e-05	8.91424e-05	0	0.000179778	0	0	0.000399453	6.55733e-05	0	0	2.71531e-05	4.05626e-05	2.70603e-05
NADH dehydrogenase [ubiquinone] iron-sulfur protein 5	NDUFS5	O43920	4			0	0	0	0	0	5.70761e-05	0	2.97026e-05	0	0	3.50234e-05	0	0	0	0	0	0	0	0	0	5.09023e-05	0	0	2.68274e-05	0	7.70384e-05	0	0	7.86813e-05	0	4.73407e-05	0	0	0	0
NADH dehydrogenase [ubiquinone] iron-sulfur protein 6, mitochondrial	NDUFS6	O75380	6			0	0	0	8.29846e-05	0	0.000294083	7.15887e-05	0.00019323	0	0	0.00012073	0	0.000125798	4.85871e-05	0	0	0	1.60928e-05	3.87777e-05	0	0.000199346	0	0.000150765	7.24987e-05	0	2.1486e-05	0	0	0.000384407	8.52616e-05	4.09402e-05	0.000140727	2.51119e-05	5.82166e-05	0.000103322
NADH dehydrogenase [ubiquinone] iron-sulfur protein 7, mitochondrial	NDUFS7	O75251;sp|Q4FM90|NUOB_PELUB;sp|Q1GIP1|NUOB_RUEST;sp|B9KQW1|NUOB1_RHOSK;sp|A4WU33|NUOB2_RHOS5;sp|Q3J3G0|NUOB1_RHOS4;sp|A3PIW9|NUOB1_RHOS1;sp|Q5LPR4|NUOB_RUEPO;sp|Q28T75|NUOB_JANSC;sp|O84970|NUOB_RHOCA;sp|A8LIT6|NUOB_DINSH;sp|B2IHW6|NUOB_BEII9;sp|A5FX09|NUOB1_ACICJ;sp|B8EIL8|NUOB_METSB;sp|Q0APY9|NUOB_MARMM;sp|Q11JK5|NUOB_CHESB;sp|Q0C1E6|NUOB_HYPNA;sp|A7HY48|NUOB_PARL1;sp|O68853|NUOB1_RHIME;sp|A8I3Y…	3			0	0	0	0	0	1.55207e-05	0	0	0	0	5.92701e-06	0	0	2.73655e-05	0	0	0	1.52622e-05	0	0	1.67604e-05	0	4.83642e-05	1.09533e-05	0	0	0	0	0	1.71977e-05	0	0	1.97111e-05	6.91437e-06	0
NADH dehydrogenase [ubiquinone] iron-sulfur protein 8, mitochondrial	NDUFS8	O00217;sp|Q0C1D6|NUOI_HYPNA;sp|Q9A6Y4|NUOI_CAUVC	3			0	0	0	0	0	3.48118e-05	0	2.44925e-05	0	0	3.58828e-05	0	0	6.52224e-05	0	0	0	0	1.78151e-05	0	2.4089e-05	0	6.45091e-05	0	0	3.35533e-05	0	0	4.54416e-05	0	1.36761e-05	0	0	0	7.27652e-05
NADH dehydrogenase [ubiquinone] flavoprotein 1, mitochondrial	NDUFV1	P49821	12			0	0.000185482	0.000199031	0.000309288	0.000302227	0.000251533	9.6161e-05	2.58065e-05	0	0	0.000116767	0.000228172	0	0.000316805	0	0.000243219	8.47348e-05	0.000241346	4.11495e-05	0	7.75396e-05	0	0.000188177	7.68502e-05	0	0.000322457	0	0	0.000155587	0	6.91369e-05	6.2265e-05	0.000181823	5.88939e-05	0.000126611
NADH dehydrogenase [ubiquinone] flavoprotein 2, mitochondrial	NDUFV2	P19404	12			0	2.85332e-05	0	9.71116e-05	0	0.000332046	0.000135228	0.000193084	0.000102217	0	2.90058e-05	0	0.000152368	0.000267689	0	0.000165401	0	0.000194476	1.27906e-05	0	2.08135e-05	0	8.74219e-06	3.58893e-05	0	2.70577e-05	3.83271e-05	0	1.08136e-05	0.000100862	0	0.000169326	0.000107171	7.46413e-06	7.98686e-05
NADH dehydrogenase [ubiquinone] flavoprotein 3, mitochondrial	NDUFV3	P56181	1			0	0	0	0	0	0	0	0	0	0	0	0	0	0	0	0	0	0	0	0	0	0	0	0	0	3.04606e-05	0	0	0.00014801	0	0	0	0	0	0
Nebulin	NEB	P20929	1			0	0	0	0	0	0	0	0	0	0	0	0	0	0	0	0	0	0	0	0	0	0	0	0	0	0	0	0	0	0	0	0	0	0	0
E3 ubiquitin-protein ligase NEDD4-like	NEDD4L	Q96PU5	1			0	0	0	0	0	0	0	0	0	0	0	0	0	0	0	0	0	0	0	0	0	0	0	0	0	0	0	0	0	0	0	0	0	0	0
NEDD8	NEDD8	Q15843	3			0	3.20106e-05	0	0	0	2.9538e-05	0	7.43301e-05	0	0	0	0	0	0	0	0	0	0	0	0	2.13084e-05	2.52743e-05	0	0	0	0	0	0	1.68597e-05	0	0	0	6.29568e-05	0	0
Neudesin	NENF	Q9UMX5	3			0	0	0	3.38322e-05	3.36153e-05	0	1.8808e-05	0	0	0	0	0	0	0	0	0	5.54952e-05	0	0	0	0	0	0	0	0	0	5.12418e-05	0	0	2.27086e-05	0	0	1.44032e-05	0	0
Nexilin	NEXN	Q0ZGT2	5			0	0	0	0	0	0	0	0	0	8.32259e-05	0	0	0	0	0	0	0	0	0	0	0	0	0	0	0	0	0	0	0	0	0	0	0	0	0
Cysteine desulfurase, mitochondrial	NFS1	Q9Y697	2			0	0	0	0	0	0	0	0	0	0	0	0	0	0	0	0	0	1.55974e-05	0	0	0	0	0	0	0	0	0	0	0	0	0	0	0	0	0
NFU1 iron-sulfur cluster scaffold homolog, mitochondrial	NFU1	Q9UMS0	2			0	0	0	0	0	0	0	0	0	0	0	0	0	0	0	0	0	0	0	0	0	0	8.87435e-06	0	0	7.9493e-06	0	0	0	0	0	0	0	0	0
H/ACA ribonucleoprotein complex subunit 2	NHP2	Q9NX24	1			0	0	0	0	0	7.74355e-06	0	0	0	0	0	0	0	0	0	0	0	0	0	0	0	0	0	0	0	0	0	0	0	0	0	0	5.02312e-05	0	0
NHP2-like protein 1;NHP2-like protein 1, N-terminally processed	NHP2L1	P55769	6			0	3.3035e-05	0	0	0	4.13425e-05	0	3.3558e-05	0	0	0	0	0	1.00157e-05	0	0	0	2.1802e-05	0	0	4.97221e-05	0	3.68431e-05	3.64772e-05	0	0	0	0	5.14951e-05	0	0	0	1.29727e-05	1.61754e-05	0
Nidogen-1	NID1	P14543	12			0	0	0	0	0	0	0	0	0	0.000605672	0	0	0	0	0	0	0	0	0	0	0	0	0	0	0	0	0	0	0	0	0	0	0	0	0
Nidogen-2	NID2	Q14112	4			0	0	0	0	0	0	0	0	0	0	0	0	0	0	0	0	0	0	0	0	0	0	0	0	0	0	0	0	0	0	0	0	0	0	0
Omega-amidase NIT2	NIT2	Q9NQR4	2			0	0	0	0	0	0	0	0	0	0	0	0	0	0	0	0	0	0	0	0	0	0	0	0	0	0	0	0	0	0	0	0	0	0	0
Nucleoside diphosphate kinase A	NME1	P15531	6			0	0	0	0	0	0	0	0	0	0	3.39908e-05	0	0	0	0	0	0	0	3.81542e-05	0	0.000102385	0	8.18943e-05	8.92043e-05	0	4.58817e-05	0	0	9.79992e-06	0	0	0	0	0.00010977	5.45276e-05
Nucleoside diphosphate kinase B;Putative nucleoside diphosphate kinase	NME2;NME2P1	P22392;O60361	7			0.000102864	0.000562371	0	0.000321005	0.000383512	0.000573679	0.000221061	0.000147694	0.000396687	0	0.00031166	0	0.000102086	0.000587444	0	0	0.000127475	0.000487563	1.89949e-05	0	0.000623032	9.65083e-05	0.000360295	0.000364659	0	0.000158154	0	0	0.000159627	0.000922441	0	0.00013322	0.000594777	0.000582691	0.00025413
Normal mucosa of esophagus-specific gene 1 protein	NMES1	Q9C002	7			0	0	0	0	0	0	0	0	0	0	0.000148987	0	0	0	0	0	0	0	6.75073e-05	0	0.00013673	0	0.000203445	0.000174712	0	2.38155e-05	0	0	0.000272958	0	2.47707e-05	0	0	0.000105795	4.22654e-05
NAD(P) transhydrogenase, mitochondrial	NNT	Q13423	18			0	0	0	5.86323e-05	0	4.08208e-05	4.53824e-05	0	0	0	0.000200748	0	0	0.000120869	0	0.00010653	0.000174398	1.58264e-05	0	0	1.64632e-05	0	4.93637e-05	0	0	0.000400533	6.59473e-05	0	0.00011243	0	6.95479e-05	0	0	4.3303e-05	7.06519e-05
Nucleolar and coiled-body phosphoprotein 1	NOLC1	Q14978	3			0	0	0	2.86668e-05	0	0	0	0	0	6.15649e-05	0	0	0	0	0	0	5.90748e-05	0	0	0	0	0	0	0	0	0	0	0	0	0	0	0	0	0	0
Non-POU domain-containing octamer-binding protein	NONO	Q15233	29			8.10675e-05	0.000146244	0	8.85736e-05	0.000224383	0.00035916	0	0.000468944	0.000159393	0	4.09517e-05	0	7.76909e-05	0.000106396	0	0	0.000301089	0.000116348	0	0	1.70095e-05	0	6.50095e-05	3.18585e-05	0	8.11263e-05	0.000131081	0	0	0.000256387	0	0.000105682	0.000215093	6.29581e-06	9.66042e-06
Nucleolar protein 58	NOP58	Q9Y2X3	4			0	0	0	0	0	0	0	0	0	0	1.26349e-05	0	0	0	0	0	0	0	0	0	2.33282e-05	0	0	0	0	4.86151e-05	0	0	0	0	0	0	0	0	0
Epididymal secretory protein E1	NPC2	P61916	3			0	0	0	0	0	0	0	0	0	0	8.72734e-05	0	0	0	0	0	0	0	0.000292822	0	0.000182507	0	0.000131622	0.000123099	0	0.000278454	0	9.03793e-05	0.000270896	2.81628e-05	0.000128681	0	0	8.09792e-05	0.000135307
Puromycin-sensitive aminopeptidase	NPEPPS	P55786	9			0	0	0	0	0	0	0	1.23699e-05	0	0	7.82248e-06	0	0	0	0	0	0	0	0	0	3.10954e-06	0	1.7368e-05	1.20495e-05	0	0	0	0	0	0	0	0	1.45691e-05	1.09975e-05	0
Nucleophosmin	NPM1	P06748	19			0.00245037	0.000225284	0.00123338	0.000462904	0.000807881	0.000272357	0.000534417	0.00182929	0.00154777	0.000137213	0.000171041	0.00121987	0.000722917	0.000138405	0.0019483	0.000323874	0.00140269	0.000198004	0.000771512	0.00107916	0.000460602	0.000647777	0.000522673	0.000126663	0.000249214	0.000588348	0.00128829	0.000159105	0.000281187	0.000463772	0.000363206	0.00042486	0.000783352	0.000410735	0.000353908
Nucleoplasmin-3	NPM3	O75607	1			0	0	0	0	0	0	0	1.60208e-05	0	0	0	0	0	0	0	0	0	1.74439e-06	0	0	0	0	0	0	0	0	0	0	0	0	0	0	3.01652e-05	0	0
Neuroplastin	NPTN	Q9Y639	3			0	0	0	0	0	9.54766e-06	0	0	0	0	0	0	0	0	0	0	0	0	0	0	0	0	0	0	0	0	0	0	0	0	0	0	0	0	0
Vesicle-fusing ATPase	NSF	P46459	11			0	0	0	0	0	8.61613e-05	0	3.18818e-05	0	0	9.63031e-06	0	0	0	0	0	0	0	4.06893e-05	0	0	0	4.50119e-05	1.53838e-05	0	0.000163232	0	0	9.91564e-06	0	3.67645e-05	0	0	8.71752e-05	0
NSFL1 cofactor p47	NSFL1C	Q9UNZ2	9			0	4.93565e-05	0	3.70881e-05	0	0.000157276	0	0.000200891	0.000139184	0	2.11338e-05	0	0	0	0	0	0	6.47294e-05	2.11704e-05	0	4.03625e-05	9.76528e-06	0	0	0	2.44894e-05	5.32422e-05	0	1.50223e-05	4.50899e-05	3.08846e-05	3.8919e-05	2.07243e-05	2.45201e-05	0
Cancer-related nucleoside-triphosphatase	NTPCR	Q9BSD7	3			0	0	0	0	0	0	0	0	0	0	0	0	0	0	0	0	0	1.1309e-05	0	0	0	0	0	0	0	0	0	0	0	1.54324e-05	0	0	7.92068e-06	0	0
Nucleobindin-1	NUCB1	Q02818	28			0.000735332	0	0.000468161	0.000781262	6.42317e-05	0.000153138	0.000256136	0.000425933	0.000551346	0.00033434	0.000118433	0.000373476	0.000510722	2.69468e-05	0.00190742	2.53325e-05	0.00126423	0.000154121	0.000269771	0.00228139	0.00024195	4.17927e-05	0.000120264	0.000175449	0.0007503	0.000536022	0.000418095	0	0.000344713	0.000249983	0.000208948	0.000782828	0.000312037	0.000202516	0.000130269
Nucleobindin-2;Nesfatin-1	NUCB2	P80303	18			0	0	0	2.58799e-05	0	0	0	0	0	0	4.05017e-06	0	0	0	0	0	0	0	0	0	1.1511e-05	0	0	0	0	2.64084e-05	3.22853e-05	0	6.23782e-05	0	0	0	5.00178e-05	2.30136e-05	0
Nuclear ubiquitous casein and cyclin-dependent kinase substrate 1	NUCKS1	Q9H1E3	5			0.00025948	4.84306e-05	0.000224087	0	0	4.29374e-05	0	0.000241491	0.000332623	0.000206204	7.74802e-05	0.00063774	0	8.28861e-05	0	0	0.000364666	0.000101418	0.000157311	0.000150572	8.68389e-05	0.000107852	4.89005e-05	0	0	0.000134378	0.000271877	0	9.63739e-05	8.5424e-05	0	0.000130614	0	3.08516e-05	0
Nuclear migration protein nudC	NUDC	Q9Y266	7			0	5.22224e-05	0	2.90529e-05	0	0	0	2.07852e-05	0	0	0	0	9.55684e-05	0	0	0	0.000112078	2.09683e-05	0	0	1.47077e-05	0	0	0	0	0	4.5375e-05	0	0	5.01989e-05	0	2.45385e-05	0	4.31943e-05	0
ADP-sugar pyrophosphatase	NUDT5	Q9UKK9	7			0	2.65673e-05	0	0	0	0	0	3.61954e-05	0	0	8.74569e-06	0	0	0	0	0	0	2.01012e-05	3.36666e-06	0	8.10625e-06	1.6207e-05	0	1.31217e-05	0	4.033e-06	0	0	0	5.74828e-06	0	3.37816e-05	1.76435e-05	2.87565e-05	0
Nuclear mitotic apparatus protein 1	NUMA1	Q14980	44			5.42697e-05	2.66934e-05	5.9087e-05	2.39259e-05	4.16935e-05	4.64312e-05	5.31219e-05	0.000286339	5.39635e-05	8.94532e-05	2.33722e-05	0	8.36201e-05	1.54296e-05	0	0.000194166	0.000102743	7.50913e-05	0	0	7.02343e-05	0	6.71021e-05	6.49152e-05	8.63253e-05	2.67721e-05	1.70247e-05	0	8.2088e-06	0.000136723	0	0	0.000280448	2.89859e-05	1.58966e-05
Nuclear pore complex protein Nup153	NUP153	P49790	1			0	0	0	0	0	0	0	0	0	0	0	0	0	0	0	0	0	0	0	0	0	0	0	0	0	0	0	0	0	0	0	0	0	0	0
Nuclear pore glycoprotein p62	NUP62	P37198	2			0	0	0	0	0	0	0	0	0	0	0	0	0	0	0	0	0	0	0	0	0	0	0	0	0	0	0	0	0	0	0	0	1.12528e-05	0	0
NXPE family member 1	NXPE1	Q8N323	2			0	0	0	0	0	0	0	0	0	0	0	0	0	0	0	0	0	0	0	0	0	0	0	0	0	0	0	0	0	0	0	0	0	7.09237e-06	0
Ornithine aminotransferase, mitochondrial;Ornithine aminotransferase, hepatic form;Ornithine aminotransferase, renal form	OAT	P04181	1			0	0	0	0	0	0	0	0	0	0	0	0	0	0	0	0	0	0	0	0	0	0	0	1.03696e-06	0	0	0	0	0	0	0	0	0	0	0
OCIA domain-containing protein 1	OCIAD1	Q9NX40	4			0	0	0	0	0	0	0	6.94738e-05	0	0	4.29274e-05	0	0	0	0	9.17299e-05	0	8.16165e-05	0	0	3.87823e-05	0	5.07446e-05	0	0	0.000122985	0.000146916	0	0.000109856	0	2.53302e-05	0	1.33584e-05	2.27243e-05	2.21834e-05
OCIA domain-containing protein 2	OCIAD2	Q56VL3	1			0	0	0	0	0	0	0	0	0	0	1.46681e-05	0	0	0	0	0	0	0	0	0	0	0	1.82416e-05	0	0	3.09671e-05	0	0	0	0	0	0	0	0	0
Occludin	OCLN	Q16625	3			0	0	0	0	0	0	0	0	0	0	0	0	0	0	0	0	0	0	2.21025e-05	0	0	0	0	0	0	0	4.97888e-05	0	0	0	0	5.64644e-05	3.03109e-05	1.89667e-05	0
2-oxoglutarate dehydrogenase, mitochondrial	OGDH	Q02218	20			0	6.46345e-05	0	0.000334883	0	0.000106537	2.97926e-05	8.63869e-05	0	0	2.11827e-05	0	0	0.000281769	0	0.000417247	0.000181584	1.63832e-05	0	0	1.4621e-05	0	3.24073e-05	1.37701e-05	0	0.000171163	0	0	1.40562e-05	0.000114315	0	0	6.97511e-05	6.21442e-05	3.03524e-05
Mimecan	OGN	P20774	9			0	0	0	0	0	0	0	0	0	0	0	0	0	0	0	0	0	0	0	0	0	0	0	0	0	0	0	0	0	0	0	0	0	0	0
Obg-like ATPase 1	OLA1	Q9NTK5	4			0	3.04006e-05	0	0	0	0	0	0	0	0	0	0	0	0	0	0	0	0	0	0	5.98232e-06	0	1.21399e-05	9.12717e-06	0	0	0	0	0	0	0	0	0	3.81834e-06	0
Dynamin-like 120 kDa protein, mitochondrial;Dynamin-like 120 kDa protein, form S1	OPA1	O60313	10			0	0	0	0	0	0	0	6.56559e-06	0	0	0	0	0	0	0	0	0	0	0	0	0	0	1.11404e-05	7.09685e-06	0	6.55669e-05	2.24595e-05	0	2.8349e-05	0	0	0	1.55834e-05	0	0
5-oxoprolinase	OPLAH	O14841	3			0	0	0.00247428	0	0	0	0	1.76301e-05	0	0	0	0	0	0	0	0	0	0	0	0	0	0	0	0	0	0	0	0	0	0	0	0	0	0	0
Optineurin	OPTN	Q96CV9	3			0	0	0	0	0	0	0	0	0	0	0	0	0	0	0	0	0	0	1.15759e-05	0	0	0	0	0	0	0	0	0	0	0	0	0	0	0	0
Alpha-1-acid glycoprotein 1	ORM1	P02763	13		Immune response	0	0	0	0	0	0	0	0	0	0	0.000644424	0	0	1.68046e-05	0	0	0	0	0.000655936	0	0.000825889	0.0020774	0.00061567	0.00235892	0	0.000139709	0	0.00118952	0.00028232	2.64259e-05	0.000749346	0	0	0.000298245	0.0010034
Alpha-1-acid glycoprotein 2	ORM2	P19652	10			0	0	0	0	0	0	0	0	0	0	4.17847e-05	0	0	0	0	0	0	0	1.04625e-05	0	9.02373e-05	0.000118635	3.5293e-05	0.000383899	0	2.46523e-06	0	0	3.81955e-05	0	1.12543e-05	0	0	4.45748e-05	9.74089e-06
Oxysterol-binding protein 1	OSBP	P22059	2			0	0	0	0	0	0	0	0	0	0	0	0	0	0	0	0	0	0	0	0	0	0	0	0	0	0	0	0	0	0	0	0	0	2.88405e-05	0
Osteoclast-stimulating factor 1	OSTF1	Q92882	5			0	0	0	0	0	3.28054e-05	0	1.16978e-05	0	0	0	0	0	0	0	0	0	0	0	0	0	0	0	1.6219e-05	0	0	0	0	1.19102e-05	0	0	0	4.48938e-05	0	0
Ubiquitin thioesterase OTUB1	OTUB1	Q96FW1	3			0	0	0	0	0	0	0	7.93983e-06	0	0	1.25116e-05	0	0	0	0	0	0	0	0	0	1.04626e-05	0	1.59927e-05	0	0	0	0	0	0	0	0	0	0	0	0
Succinyl-CoA:3-ketoacid coenzyme A transferase 1, mitochondrial	OXCT1	P55809	5		Butyrate metabolism	0	0	0	0	0	0	0	0	0	0	0	0	0	0	0	0	0	0	0	0	0	0	3.47726e-05	2.06478e-05	0	3.60904e-05	0	0	0	0	0	0	0	0	2.10648e-05
Serine/threonine-protein kinase OSR1	OXSR1	O95747	4			0	3.8506e-05	0	0	0	2.60253e-05	0	0	0	0	0	0	0	0	0	0	0	0	1.77581e-05	0	1.97683e-05	0	0	0	0	3.2384e-05	0	0	0	0	0	3.92043e-05	2.39297e-05	1.55993e-05	3.61956e-05
P2X purinoceptor 4	P2RX4	Q99571	2			0	0	0	1.52433e-05	0	0	0	0	0	0	0	0	0	0	0	0	0	0	0	0	0	0	0	0	0	0	0	0	0	0	0	0	0	0	0
Protein disulfide-isomerase	P4HB	P07237	47			0.00461044	0.0030024	0.00459784	0.00520075	0.00307188	0.0030058	0.00383235	0.0044998	0.00303023	0.000692319	0.00276023	0.0021932	0.0029241	0.00223085	0.00166165	0.00386942	0.00455953	0.00282325	0.00190147	0.003578	0.00348834	0.000627822	0.00361906	0.0024702	0.00295172	0.00659038	0.00412316	0.000500318	0.00604594	0.00467444	0.00214896	0.00560376	0.00495223	0.00454984	0.00208194
Proliferation-associated protein 2G4	PA2G4	Q9UQ80	23			0.000114203	0.000127464	0.000153661	0	0	2.15633e-05	2.86709e-05	9.18882e-05	0	0	0.000115167	0.000122451	0	2.64153e-05	0	4.08158e-05	8.25817e-05	4.79569e-05	8.45051e-05	0	0.000341756	6.06442e-05	0.000142677	0.000171444	0	0.000204087	9.57774e-05	0	7.6913e-05	2.19149e-05	6.646e-05	0	0.000359907	0.000266078	0.000108127
Polyadenylate-binding protein 1	PABPC1	P11940	28			8.11301e-05	0.000169019	4.8513e-05	0.000121611	3.34369e-05	9.91143e-05	0	0.000385772	0.000143682	0	4.37313e-05	0	5.118e-05	1.85113e-05	0	3.71351e-05	0	4.149e-05	4.36373e-05	0	6.41928e-05	1.27438e-05	7.30558e-05	8.70327e-05	0	0.000123482	0.000109795	3.0084e-05	6.34667e-05	4.37937e-05	7.89404e-06	5.35844e-05	0.000417127	0.000226413	8.1169e-06
Polyadenylate-binding protein 2	PABPN1	Q86U42	5			0.000102685	5.46599e-05	9.40867e-05	8.3139e-05	2.49361e-05	3.16198e-05	1.1154e-05	7.89297e-05	4.68476e-05	0	1.95684e-05	8.99683e-05	0.000138632	1.41487e-05	0.000394778	0	8.3853e-05	0	3.70984e-05	0.000156526	5.02636e-05	5.59112e-05	1.50434e-05	0	0	0	0.000130607	0	1.07812e-05	4.78551e-05	4.7464e-05	6.04902e-05	2.16117e-05	2.6141e-05	0
Protein kinase C and casein kinase substrate in neurons protein 2	PACSIN2	Q9UNF0	19			7.01231e-05	0.000167815	0.000237678	5.10622e-05	6.46176e-05	0.000151664	0.000113688	0.000239623	0.000469066	0	2.57066e-05	0	9.50024e-05	0.000133248	0	9.62636e-05	0	0.000152373	0.000221326	0	9.10326e-05	0	0	6.90923e-05	0	0.000140838	0.000192107	0	0.000117865	9.50375e-05	0.000127407	0.00027441	7.94624e-05	0.000133399	6.43697e-05
Protein-arginine deiminase type-2	PADI2	Q9Y2J8	9			0	0	0	0	0	1.4555e-05	0	0	0	0	2.92571e-05	0	0	0	0	0	0	0	7.65943e-05	0	0	0	9.66665e-05	0	0	0.000102204	0	0	1.15565e-05	1.44609e-05	1.86538e-05	0	0	1.33782e-05	2.94426e-05
Platelet-activating factor acetylhydrolase IB subunit alpha	PAFAH1B1	P43034	3			0	0	0	0	0	0	0	0	0	0	1.88446e-05	0	0	0	0	0	0	0	7.73899e-05	0	7.23352e-05	5.69592e-05	4.56521e-05	0	0	1.37319e-05	0	0	0	0	4.73516e-05	0	0	3.14287e-05	5.76286e-05
Platelet-activating factor acetylhydrolase IB subunit gamma	PAFAH1B3	Q15102	3			0	5.55237e-05	0	0	0	0	0	1.56075e-05	0	0	0	0	0	0	0	0	0	2.37557e-05	0	0	0	0	0	0	0	0	0	0	0	0	0	0	7.03385e-05	0	0
Phosphoprotein associated with glycosphingolipid-enriched microdomains 1	PAG1	Q9NWQ8	2			0	0	0	0	0	0	0	0	0	0	0	0	0	0	0	0	0	0	2.3713e-05	0	0	0	1.14832e-05	0	0	1.66595e-05	0	0	1.14546e-05	0	0	0	0	0	0
Multifunctional protein ADE2;Phosphoribosylaminoimidazole-succinocarboxamide synthase;Phosphoribosylaminoimidazole carboxylase	PAICS	P22234	7			0.000154885	0.000105046	0	5.44895e-05	5.87917e-05	3.98987e-06	4.68129e-05	0.000136944	8.34199e-05	0	0	0	0.000107831	6.99345e-05	0	0.000102973	4.34939e-05	3.94374e-05	0	0	1.13945e-05	0	2.12167e-05	0	0	2.06923e-05	2.54203e-05	0	0	0.000110864	0	0	0.000262793	0	1.62635e-05
Serine/threonine-protein kinase PAK 1	PAK1	Q13153	3			0	0	0	0	0	0	0	0	0	0	0	0	0	0	0	0	0	0	0	0	0	0	7.89894e-06	0	0	0	0	0	0	0	0	0	1.3837e-05	9.83701e-06	0
Serine/threonine-protein kinase PAK 2;PAK-2p27;PAK-2p34	PAK2	Q13177	6			0	2.81048e-05	0	0	0	0	2.43815e-05	3.76357e-05	3.40426e-05	0	0	0	0	0	0	0	0	0	0	0	0	0	2.50577e-05	0	0	0	4.99114e-05	0	0	1.67931e-05	0	0	2.64558e-05	1.304e-05	0
Palladin	PALLD	Q8WX93	8			0	2.06972e-05	0	0	0	0	0	0	0	0.000584904	0	0	0	0	0	0	0	0	0	0	0	0	0	0	0	0	0	0	0	0	0	0	0	0	0
Mitochondrial import inner membrane translocase subunit TIM16	PAM16	Q9Y3D7	2			0	0	0	0	0	0	0	0	0	0	0	0	1.35429e-05	0	0	0	0	0	0	0	0	0	0	0	0	0	0	0	0	0	0	0	0	0	0
Bifunctional 3-phosphoadenosine 5-phosphosulfate synthase 2;Sulfate adenylyltransferase;Adenylyl-sulfate kinase	PAPSS2	O95340	12			0	0.000141581	0	0.000109544	0	2.51668e-05	0	9.29528e-05	7.5327e-05	0	0	0	0	0	0	0	0	0.00010951	0	0	0	0	4.45019e-05	6.36297e-06	0	4.00756e-05	0	0	0	0	2.16083e-05	0	5.31451e-05	0.000173589	3.32232e-05
Protein deglycase DJ-1	PARK7	Q99497	17	Methylglyoxal detoxification	Methylglyoxal detoxification	0.000225067	0.000330333	0	6.92417e-05	0	0.000435364	2.3661e-05	0.000463172	0	0	0.000642608	0	0.000160183	0.000312705	0	9.97271e-05	3.48645e-05	0.000194559	0.000518513	0	0.000900685	0.00051501	0.000496831	0.000453996	0	0.000470911	4.22309e-05	0.000316094	0.000298183	0.000559314	0.000539604	0.000341653	0.000383351	0.00115231	0.00039214
Poly [ADP-ribose] polymerase 1	PARP1	P09874	8			0	2.06454e-05	0	1.79471e-05	0	2.24819e-05	6.61076e-05	1.86832e-05	0	0	1.89895e-05	0	0	0	0	0	0	1.40475e-05	0	0	2.65819e-05	0	0	1.40165e-05	0	0	0	0	0	4.66349e-05	5.96375e-06	0	0.000144064	9.08508e-06	0
Poly [ADP-ribose] polymerase 4	PARP4	Q9UKK3	5			0	0	0	0	0	3.92607e-06	0	0	0	0	0	0	0	0	0	0	0	0	0	0	9.9404e-07	0	0	1.16652e-06	0	4.09503e-05	0	0	0	0	0	0	0	0	1.97846e-05
Alpha-parvin	PARVA	Q9NVD7	1			0	0	0	0	0	0	0	0	0	0	0	0	0	0	0	0	0	0	0	0	0	0	0	0	0	0	0	0	0	0	0	0	0	0	0
Protein PBDC1	PBDC1	Q9BVG4	3			0	0	0	0	0	0	0	0	0	0	0	0	0	0	0	0	0	0	0	0	0	0	0	0	0	0	0	0	0	0	0	0	0	0	0
Phenazine biosynthesis-like domain-containing protein	PBLD	P30039	1			0	0	0	0	0	0	0	0	0	0	0	0	0	0	0	0	0	0	0	0	0	0	0	0	0	0	0	0	0	0	0	0	0	0	0
Pyruvate carboxylase, mitochondrial	PC	P11498	7			0	0	0	0	0	2.20049e-05	0	5.57857e-05	0	0	0	0	0	1.86317e-05	0	0.000125406	0	2.2973e-05	0	0	0	0	0	0	0	3.89175e-05	0	0	1.43105e-05	2.21481e-05	0	0	0	3.0986e-05	0
Pterin-4-alpha-carbinolamine dehydratase	PCBD1	P61457	1			0	2.76781e-05	0	0	0	3.44952e-05	0	0	0	0	0	0	0	0	0	0	0	0	0	0	0	0	0	0	0	0	0	0	0	0	0	0	0	0	0
Poly(rC)-binding protein 1	PCBP1	Q15365	12			9.77957e-05	0.000312298	0	8.2269e-05	7.52927e-05	0.000666167	0.000147939	0.000310761	0.000290486	0	8.64111e-05	0.000128273	4.83681e-05	0.000294265	0	3.17405e-05	0.000130926	0.000213357	8.19098e-05	0.000140193	0.000231201	1.75854e-05	0.0001872	0.000162367	0	0.000107325	4.78324e-05	0	5.96904e-05	0.000584427	4.87244e-05	5.49502e-05	0.000200914	0.000296181	7.50154e-05
Poly(rC)-binding protein 2;Poly(rC)-binding protein 3	PCBP2;PCBP3	Q15366;P57721	8			0	0	0	0	0	4.89988e-05	0	0	0	0	1.16964e-05	0	0	2.01737e-05	0	0	0	0	0	0	1.10668e-05	0	3.24232e-05	2.42598e-06	0	1.39243e-05	0	0	0	3.09009e-05	0	0	0	2.54615e-05	4.40695e-06
Propionyl-CoA carboxylase alpha chain, mitochondrial	PCCA	P05165	15			0	0	0	3.10102e-05	0	0.000132255	0	1.95224e-05	3.89264e-05	0	4.54105e-05	0	0	8.37582e-05	0	5.78985e-05	3.42618e-05	7.69523e-05	1.85645e-05	0	3.3937e-05	0	2.79853e-05	0.000134986	0	0.000257568	0	0	0.000136509	4.2223e-05	1.17667e-05	0	2.07792e-05	1.17583e-05	0
Propionyl-CoA carboxylase beta chain, mitochondrial	PCCB	P05166	10			0	1.81906e-05	0	7.41001e-05	0	5.14084e-05	3.2072e-05	2.67813e-05	0	0	2.78555e-05	0	0	7.64168e-05	0	0.000111965	0	7.12525e-05	2.76545e-05	0	1.96189e-05	0	6.75365e-05	2.91666e-05	0	0.000129795	2.98324e-05	0	2.9378e-05	5.72135e-05	2.8868e-05	0	2.24115e-05	2.2217e-05	1.59744e-05
Phosphoenolpyruvate carboxykinase, cytosolic [GTP]	PCK1	P35558	6			0	8.38789e-05	0	0	0	0	0	9.37982e-06	0	0	0	0	0	0	0	0	0	2.81117e-05	0	0	0	0	0	0	0	0	0	0	0	0	0	0	9.4639e-05	1.69241e-05	0
Phosphoenolpyruvate carboxykinase [GTP], mitochondrial	PCK2	Q16822	19			0	0.000125747	0	9.82e-05	6.15697e-05	7.70287e-05	5.15131e-05	0	0	0	9.459e-05	0	4.55607e-05	0.000135413	0	0.000264919	0.000109635	0.000157088	1.01137e-05	0	8.88233e-06	0	0.000122267	4.96723e-05	0	0.000210629	7.68772e-05	0	3.03365e-05	0	0	0	2.04422e-05	5.42364e-05	4.26335e-05
Protein-L-isoaspartate(D-aspartate) O-methyltransferase	PCMT1	P22061	6			0	0	0	0	0	0	0	0	0	0	1.77847e-05	0	0	0	0	0	0	2.76777e-05	0	0	4.04911e-05	0	0	6.26143e-06	0	0	0	0	1.05463e-05	0	0	0	0	0	0
PEST proteolytic signal-containing nuclear protein	PCNP	Q8WW12	5			0	0	0	0	0	0	0	0	0	0	0	0	0	0	0	0	0	0	0	0	0	7.0718e-05	0	0	0	0	0	0	0	2.66617e-05	0	0	0	0	0
ProSAAS;KEP;Big SAAS;Little SAAS;Big PEN-LEN;PEN;Little LEN;Big LEN	PCSK1N	Q9UHG2	6	Somatostatin signaling	Somatostatin signaling	0	1.86605e-05	6.58342e-05	7.45596e-05	7.00292e-05	9.68268e-06	7.39719e-05	0.000105727	5.86375e-05	0	0	5.78932e-05	6.59627e-05	2.66929e-05	0.000212135	5.01189e-05	0.000136034	0	0	0	0	0	0	0	0	0	0	0	0	4.83821e-05	0	2.44387e-05	4.64775e-05	0	0
Choline-phosphate cytidylyltransferase A;Choline-phosphate cytidylyltransferase B	PCYT1A;PCYT1B	P49585;Q9Y5K3	2			0	0	0	0	0	0	0	1.14744e-05	0	0	0	0	0	0	0	0	0	9.4264e-06	0	0	0	0	0	0	0	0	0	0	0	0	0	0	0	0	0
28 kDa heat- and acid-stable phosphoprotein	PDAP1	Q13442	10			0	0	0	2.08923e-05	0	0	0	3.59951e-05	0	0	0	0	2.87383e-05	0	0	0	0	0	0	0	6.42852e-05	1.8965e-05	0	0	0	0	0	0	0	6.66196e-05	0	0	3.33156e-05	0	0
Programmed cell death protein 10	PDCD10	Q9BUL8	3			0	0	0	0	0	0	0	1.22572e-05	0	0	0	0	0	0	0	4.66465e-05	0	0	0	0	0	0	0	0	0	0	0	0	0	0	0	0	1.22321e-05	0	0
Programmed cell death protein 4	PDCD4	Q53EL6	17			0	2.43613e-05	0	0	0	4.51265e-05	0	1.41045e-05	0	0	3.64627e-05	0	0	4.67192e-06	0	0	0	3.77137e-06	9.6495e-05	0	6.43045e-05	0	2.27324e-05	6.20264e-05	0	7.99772e-05	0	0	1.27074e-05	0	0	0	2.52714e-05	5.47037e-05	0
Programmed cell death protein 5	PDCD5	O14737	4			0	7.20317e-05	0	0	0	6.06442e-05	0	4.73192e-05	0	0	3.42582e-06	0	0	0	0	1.91377e-05	0	2.21299e-05	1.60437e-05	0	1.21835e-05	9.34354e-06	1.32227e-05	0	0	1.2986e-05	4.76368e-05	0	0	4.88202e-05	0	0	5.22925e-05	0	6.5178e-06
Programmed cell death 6-interacting protein	PDCD6IP	Q8WUM4	35			0.000357127	0.000661271	0.000163996	0.000413529	0.000202524	0.000468321	0.000238249	0.000258378	0.000340347	0	0.000194545	0.00022786	0.000176934	0.000179531	0	0.000503453	0.00011075	0.000329008	0.00027347	0.000247364	0.000165829	0	0.000406814	5.05696e-05	0	0.000854976	0.000404708	0	0.000130202	0.000277093	0.000375947	0.000196051	0.000645426	0.000901104	0.000287606
Pyruvate dehydrogenase E1 component subunit alpha, somatic form, mitochondrial	PDHA1	P08559	17			0	5.11358e-05	0.000185196	0.000191651	0.00017392	0.00014759	0.000185332	0.000243964	0.000128148	0	6.0906e-05	0.000358072	7.31316e-05	0.000193979	0	0.000328359	0.00038083	0.000145128	3.46127e-05	0.000207905	2.94757e-05	0	0.000113662	3.6916e-05	0.000187978	0.000266181	0.000481278	0	0.000253027	0.000117059	0	5.07582e-05	0.000232292	2.53397e-05	0.000128806
Pyruvate dehydrogenase E1 component subunit beta, mitochondrial	PDHB	P11177	10			0	0	0	0	0	0.000124478	5.20177e-05	3.62675e-05	0	0	0.000102422	0	0	6.63722e-05	0	0	0	3.42279e-05	4.74583e-05	0	2.70696e-05	0	8.33605e-05	6.67858e-05	0	0.000191508	0	0	0.000154513	0	5.65441e-05	0	0.000117631	0.000117961	5.25736e-05
Pyruvate dehydrogenase protein X component, mitochondrial	PDHX	O00330	11			5.6049e-05	0	0.000163421	4.3221e-05	4.81862e-05	8.38619e-05	0.000125385	8.97831e-05	6.80065e-05	0	3.5111e-05	0.000150024	0.000182854	0.000113627	0	7.34888e-05	0.000269465	5.72289e-05	1.87128e-05	9.59208e-05	2.2238e-05	0	3.5993e-05	2.11527e-05	8.53371e-05	7.11677e-05	0.000135261	0	9.68011e-05	2.97168e-05	0	4.60719e-05	4.62863e-05	8.69442e-06	2.28607e-05
Protein disulfide-isomerase A3	PDIA3	P30101	58			0.0154898	0.00490853	0.00732061	0.015333	0.00779212	0.00549683	0.00833352	0.00800402	0.00939495	0.00183364	0.00463782	0.00459776	0.00710474	0.00523576	0.00463838	0.00752916	0.0115127	0.00700431	0.00324581	0.00746382	0.00472444	0.00111093	0.00425469	0.00396557	0.00746257	0.00954853	0.0118083	0.000185196	0.0103265	0.00845053	0.00360521	0.0122014	0.0137535	0.0064922	0.00331017
Protein disulfide-isomerase A4	PDIA4	P13667	50			0.00322492	0.00113017	0.000951209	0.00483807	0.00144484	0.0015065	0.00198747	0.00218676	0.00180901	0.000694407	0.000911326	0.00127753	0.00158975	0.00148449	0.00081604	0.00199623	0.00434217	0.0016656	0.000392745	0.00279315	0.00111222	0.000271008	0.00128765	0.00132064	0.000839241	0.0032808	0.00256694	9.706e-05	0.00239449	0.00220167	0.000711535	0.002604	0.0041027	0.00290096	0.000599413
Protein disulfide-isomerase A5	PDIA5	Q14554	4			0	0	0	3.32322e-05	0	0	0	0	0	0	1.73959e-05	0	0	0	0	0	0	0	1.46697e-05	0	0	0	2.47583e-05	0	0	5.20849e-05	0	0	2.57355e-05	0	0	1.20855e-05	2.47506e-05	3.47393e-05	1.9899e-05
Protein disulfide-isomerase A6	PDIA6	Q15084	22			8.28077e-05	0.000236461	0.000113964	0.000572915	0.000191179	0.000309907	0.000363724	0.000428062	8.47156e-05	0	0.000235312	0	0.000165803	0.000250225	0	0.000227344	0.000154267	0.000426225	2.76631e-05	0	0.000120043	0	0.000156802	0.000123563	0	0.000397945	0.000135044	0	0.00022145	0.00014756	3.51589e-05	9.15598e-05	0.00136563	0.0003222	2.66213e-05
PDZ and LIM domain protein 1	PDLIM1	O00151	24			0.00134954	0.000989859	0.000652236	0.000734749	0.00030331	0.00224524	0.000237645	0.00194535	0.00176298	0.000269735	0.000543603	0.000800982	0.000934931	0.000556551	0	6.17172e-05	0.00019946	0.000578826	0.00157756	0	0.000734294	0.000637506	0.000480022	0.000183643	0.000177992	0.000609212	0.000200846	0	0.000444701	0.00144905	0.000626761	0.00125963	0.000788919	0.000424629	0.000296267
PDZ and LIM domain protein 5	PDLIM5	Q96HC4	8			0	0	0	0	3.56543e-05	0	0	2.98633e-05	0	0	4.77722e-06	0	0	0	0	0	0	0	0.000139337	0	8.16972e-05	2.21704e-05	0.000100549	9.93024e-06	0	5.95957e-05	0	0	3.00542e-05	3.80753e-05	5.04861e-05	0	0	0.000149283	0
PDZ and LIM domain protein 7	PDLIM7	Q9NR12	7			0	0	0	0	0	0	0	0	0	0.000151385	0	0	0	0	0	0	0	0	0	0	0	0	0	0	0	0	0	0	0	0	0	0	0	0	0
Pyridoxal-dependent decarboxylase domain-containing protein 1	PDXDC1	Q6P996	20			0	0.00012164	0	0.000103284	0	0.000201978	0	2.09042e-05	0	0	1.44572e-05	0	5.26578e-05	3.16545e-05	0	7.19835e-05	0	0.000216126	1.77373e-05	0	5.13377e-05	0	0.000163699	9.41549e-06	0	0.000119383	3.56774e-05	0	0	0.00016489	3.98606e-05	0	8.45526e-05	0.000167566	0
Pyridoxal kinase	PDXK	O00764	4			0	2.78387e-05	0	0	0	0	0	2.05922e-05	0	0	1.47114e-05	0	0	0	0	0	0	0	0	0	1.93594e-05	0	0	9.15192e-07	0	0	0	0	0	0	0	0	0	0	0
Pyridoxal phosphate phosphatase	PDXP	Q96GD0	1			0	1.64505e-05	0	0	0	0	0	0	0	0	0	0	0	0	0	0	0	0	0	0	0	0	0	0	0	0	0	0	0	0	0	0	0	0	0
Astrocytic phosphoprotein PEA-15	PEA15	Q15121	1			0	0	0	0	0	0	0	0	0	0	1.40572e-05	0	0	0	0	0	0	0	0	0	0	4.13094e-05	0	1.81241e-05	0	0	0	0	0	1.01812e-05	2.51633e-05	0	0	0	0
Phosphatidylethanolamine-binding protein 1;Hippocampal cholinergic neurostimulating peptide	PEBP1	P30086	11			0.000809424	0.000493513	0	0	0.00029775	0.000214071	0.00022958	0.000415486	0.000593916	0	0.000524128	0	0.00030819	0.000172892	0	0	0.000498302	0.000257552	0.000340622	0	0.000920931	0.000820662	0.000704193	0.000306208	0	0.000207103	0.000456041	0.00272004	0.000171794	0.000409332	0.000653448	0.00054128	0.00015016	0.00089202	0.000186164
Xaa-Pro dipeptidase	PEPD	P12955	3			0	0	0	0	0	0	0	0	0	0	0	0	0	0	0	0	0	0	0	0	0	0	0	6.28984e-07	0	0	0	0	0	1.60599e-05	0	0	0	1.24646e-05	9.96827e-06
Peroxisomal membrane protein PEX14	PEX14	O75381	2			0	0	0	0	0	0	0	0	0	0	0	0	0	0	0	0	0	0	0	0	0	0	0	0	0	0	0	0	0	0	0	0	0	0	0
Prefoldin subunit 1	PFDN1	O60925	3			5.66473e-05	2.35839e-05	0	1.86755e-05	1.70164e-05	0	1.90134e-05	7.31298e-05	0	0	0	0	1.90867e-05	1.37908e-05	0	0	0	1.92415e-05	0	0	0	8.50888e-06	0	0	0	0	0	0	0	5.8694e-05	0	0	2.94605e-05	7.42003e-06	0
Prefoldin subunit 2	PFDN2	Q9UHV9	3			0	9.70874e-06	0	0	0	0	0	9.02173e-06	0	0	0	0	0	0	0	0	0	0	0	0	7.61939e-06	0	0	0	0	0	0	0	0	8.34668e-06	0	0	0	0	0
Prefoldin subunit 5	PFDN5	Q99471	2			0	0	0	0	0	0	0	0	0	0	0	0	0	0	0	0	0	0	0	0	0	0	0	0	0	0	0	0	0	0	0	0	0	0	0
Prefoldin subunit 6	PFDN6	O15212	3			0	0	0	0	0	0	0	1.05247e-05	0	0	0	0	0	0	0	0	0	0	0	0	3.07853e-05	0	0	6.55706e-06	0	0	0	0	0	0	0	0	1.79594e-05	0	0
ATP-dependent 6-phosphofructokinase, liver type	PFKL	P17858	9			0	7.53381e-05	0	0	2.9661e-05	0.000129531	9.10447e-05	0	7.70502e-05	0	4.22375e-06	9.56463e-05	9.71315e-05	6.67649e-05	0	0.000166715	0	0.000117316	8.97388e-05	0	2.95553e-05	0	0	1.85013e-05	0	2.36705e-05	0	0	1.34293e-05	1.14325e-05	0	0	0.000167286	3.68791e-05	2.27357e-05
ATP-dependent 6-phosphofructokinase, platelet type	PFKP	Q01813	5			0	0	0	0	0	1.52507e-05	0	0	0	0	0	0	0	0	0	0	0	9.52778e-06	0	0	6.83777e-06	0	9.3741e-06	4.50086e-06	0	2.09192e-05	0	0	0	0	0	0	0	0	2.86815e-05
Profilin-1	PFN1	P07737	17	Bacterial adhesion; actin remodelling	Bacterial adhesion; actin remodelling	0	0.00130148	0	0.000233173	5.34084e-05	0.00146363	0.000297701	0.001273	0.000508396	0	0.00147396	0	0.000247905	0.000572627	0	2.17989e-05	0	0.000357267	0.00118769	0	0.00259239	0.000934438	0.00200361	0.00115499	0	0.000847032	5.44506e-05	0.000468337	0.000568651	0.000449353	0.00109244	0.000163575	0.00132918	0.00268557	0.00144747
Profilin-2	PFN2	P35080	1			0	0	0	0	0	0	0	1.60667e-05	0	0	0	0	0	0	0	0	0	0	0	0	2.06448e-05	0	0	7.43242e-06	0	0	0	0	0	0	0	0	0	1.09008e-05	0
Phosphoglycerate mutase 1	PGAM1	P18669	20			0	0.00101831	0.000228216	0.000305661	0.00029391	0.000670117	0.000211194	0.000387629	5.72119e-05	0	0.000284015	0.000127601	9.66509e-05	0.000254477	0	0.000149429	0.000119166	0.000530186	0.00041014	0	0.000398339	0.000240778	6.07024e-05	0.000436106	0	0.000351621	0.000214685	0.000181322	8.99377e-05	0.000123297	0.000318573	0.000191234	0.000717859	0.000942639	0.00056084
Serine/threonine-protein phosphatase PGAM5, mitochondrial	PGAM5	Q96HS1	2			0	0	0	0	0	0	0	0	0	0	0	0	0	0	0	0	0	0	0	0	0	0	0	0	0	0	0	0	0	0	0	0	0	0	0
6-phosphogluconate dehydrogenase, decarboxylating	PGD	P52209	7			0	7.33412e-05	0	0	0	2.03547e-05	0	2.44152e-05	0	0	4.00885e-05	0	0	1.49115e-05	0	1.76178e-05	0	2.48757e-05	2.96112e-05	0	4.5162e-05	0	0.000142346	1.43433e-05	0	0	0	0	0	2.10426e-05	2.5593e-05	0	2.28035e-05	0.000269685	9.58974e-05
Phosphoglycerate kinase 1	PGK1	P00558	47			7.54767e-05	0.00169311	0.000167797	0.000538379	0.000401248	0.00139931	0.000481605	0.00151827	0.000296676	0	0.00162222	0.000192447	7.61726e-05	0.000699128	0	0.000192825	0.000163111	0.000763601	0.00134385	0	0.00156019	0.000842001	0.00187874	0.00206942	0	0.00137299	0.000133522	0.000899361	0.000616092	0.000607234	0.000900975	0.000543527	0.00165987	0.00177779	0.00109602
6-phosphogluconolactonase	PGLS	O95336	3			0	5.94296e-05	0	1.35919e-05	0	0	0	8.25763e-06	0	0	0	0	0	2.18225e-05	0	0	0	1.43463e-05	0	0	0	0	0	0	0	0	0	0	0	0	0	0	7.59612e-05	1.89578e-05	0
Phosphoglucomutase-1	PGM1	P36871	8			0	0	0	0	0	2.10386e-05	0	0	0	0	4.2726e-06	0	0	0	0	0	0	1.07084e-05	8.2228e-06	0	3.03169e-06	0	1.78203e-05	0	0	1.42288e-05	0	0	0	0	0	0	0	4.10057e-05	8.76281e-06
Phosphoglucomutase-2	PGM2	Q96G03	3			0	0	0	0	0	0	0	0	0	0	0	0	0	0	0	0	0	0	0	0	0	0	0	0	0	0	0	0	0	0	0	0	0	0	0
Phosphoglucomutase-like protein 5	PGM5	Q15124	3			0	0	0	0	0	0	0	0	0	0	0	0	0	0	0	0	0	0	0	0	0	0	0	0	0	0	0	0	0	0	0	0	0	1.06451e-05	0
Membrane-associated progesterone receptor component 1	PGRMC1	O00264	6			0.000124111	4.28023e-05	0	0.000101439	3.41681e-05	9.50167e-05	0.00016776	3.04217e-05	0	8.54915e-05	0	0	0.000116119	9.38267e-05	0	0.000290638	4.97214e-05	0.000138019	0	0	1.2165e-05	0	3.39479e-05	0	0	3.11902e-05	0.000198344	0	1.94108e-05	0.000102725	0	7.93521e-05	8.0202e-05	3.64958e-05	0
Prohibitin	PHB	P35232	20			0	0	0.000496111	0.000669518	4.95339e-05	0.000419433	0.000131536	0.000214313	0	9.65154e-05	0.000185509	0.000212027	3.79767e-05	0.000358828	0	0.000906598	4.54999e-05	0.000260394	0.000119163	0.000175986	0.000209276	0	0.000443642	0.000183348	0	0.000740886	0.000156068	6.17378e-05	0.000309736	0.000110331	0.000252929	1.95269e-05	0.000807883	0.000237303	0.000326592
Prohibitin-2	PHB2	Q99623	23			0	0.000214349	0.000771702	0.000718592	0.000331669	0.000579911	0.000312761	0.000392117	0	0.000176088	0.000479426	0.000526832	0.000517011	0.000529563	0.000261762	0.00123665	6.13001e-05	0.000496639	0.000387777	0.00019321	0.000374735	0	0.000866784	0.00124607	0.000548339	0.00109467	0	0.000158419	0.000430752	0.000285082	0.00039973	6.51136e-05	0.0002042	0.000521607	0.000687498
Pleckstrin homology-like domain family B member 1	PHLDB1	Q86UU1	1			0	0	0	0	0	1.04975e-05	0	0	0	0	0	0	0	0	0	0	0	0	0	0	0	0	0	0	0	0	0	0	0	1.92619e-05	0	0	1.97438e-05	0	0
14 kDa phosphohistidine phosphatase	PHPT1	Q9NRX4	2			0	3.82832e-05	0	0	0	0	0	0	0	0	0	0	0	0	0	0	0	0	2.54763e-05	0	0	0	0	0	0	0	0	0	0	0	0	0	0	0	0
Polymeric immunoglobulin receptor;Secretory component	PIGR	P01833	38			0.00188803	0.00144573	0.00191553	0.00206237	0.00168921	0.00200021	0.00198503	0.0017985	0.0014582	0.000279436	0.000634061	0.00230454	0.00255154	0.00271377	0.000202236	0.00770366	0.00301151	0.0021726	0.0011735	0.00295553	0.00112146	0.000230361	0.0006805	0.00109761	0.00256938	0.0062617	0.00211252	0.000133989	0.00248012	0.00260201	0.00136605	0.00168679	0.00104492	0.00225809	0.00097121
Peptidyl-prolyl cis-trans isomerase NIMA-interacting 1	PIN1	Q13526	2			0	0	0	0	0	0	0	2.1041e-05	0	0	0	0	0	0	0	0	0	0	0	0	3.41105e-06	0	0	0	0	0	0	0	0	0	0	0	0	0	0
Phosphatidylinositol transfer protein beta isoform	PITPNB	P48739	1			0	0	0	0	0	0	0	0	0	0	0	0	0	0	0	0	0	0	0	0	0	0	0	0	0	0	0	0	0	0	0	0	0	0	0
Presequence protease, mitochondrial	PITRM1	Q5JRX3	2			0	0	0	0	0	0	0	0	0	0	6.93503e-06	0	0	0	0	0	0	0	0	0	0	0	0	0	0	0	0	0	0	0	0	0	0	0	2.58118e-05
cAMP-dependent protein kinase inhibitor beta	PKIB	Q9C010	1			0	0	0	0	0	0	0	0	0	0	0	0	0	0	0	0	0	0	0	0	0	0	0	0	0	0	0	0	0	0	0	0	0	0	0
Pyruvate kinase PKM	PKM	P14618	52			0.00105369	0.002144	0.000588764	0.00147402	0.00171929	0.0026478	0.000695051	0.00291046	0.00145833	0	0.00141071	0.00128903	0.00178609	0.0012319	0	0.00108799	0.000932126	0.00125612	0.0017513	0.000140696	0.00181872	0.000655909	0.00219704	0.00144024	0.000133483	0.00217453	0.00178005	0.000214661	0.000536814	0.00179295	0.00098742	0.0010047	0.00330082	0.00337144	0.00146033
Plakophilin-2	PKP2	Q99959	21	Desmosome	Desmosome	0.000235834	4.81421e-05	0	6.76486e-05	0.000101971	0.000178761	4.11735e-05	0.000261154	0.000290328	8.05766e-05	0	0.000355166	0.000128139	4.31374e-05	0	5.17885e-05	8.86443e-05	0.00012302	1.67456e-05	0	0	0	6.03837e-05	0	0	0.000185865	0.000104261	0	3.90946e-05	0	0	0.000110961	0.000102507	7.25462e-05	7.39369e-05
Plakophilin-3	PKP3	Q9Y446	7	Desmosome	Desmosome	0.000110257	1.62264e-05	0	4.22455e-05	0	9.84186e-05	0	5.75568e-05	6.03358e-05	0	0	5.71113e-05	0	3.28585e-05	0	0	2.66193e-05	2.24515e-05	5.98976e-06	0	0	0	0	0	0	0	2.59269e-05	0	0	1.07332e-05	0	0	1.18391e-05	0	0
Phospholipase A2, membrane associated	PLA2G2A	P14555	3			0	0	0	0	0	0	0	0	0	0	0	0	0	0	0	0	0	0	0	0	0	0	0	0	0	5.41155e-05	0	0.000342571	0	0	0	0	0	0	0
1-phosphatidylinositol 4,5-bisphosphate phosphodiesterase beta-3	PLCB3	Q01970	3			0	0	0	0	0	0	0	1.8296e-05	0	0	0	0	0	0	0	0	0	0	0	0	0	0	0	0	0	0	0	0	0	0	0	0	1.59299e-05	0	0
1-phosphatidylinositol 4,5-bisphosphate phosphodiesterase delta-1	PLCD1	P51178	3			0	0	0	1.6667e-05	0	0	0	0	0	0	0	0	0	0	0	0	0	0	0	0	0	0	0	0	0	0	0	0	0	0	0	0	0	0	0
Plectin	PLEC	Q15149	319			0.00524056	0.00449375	0.00561074	0.00475446	0.00437422	0.00780604	0.0023635	0.00477064	0.00474508	0.000763433	0.000842603	0.00402587	0.00544411	0.00284524	0.00179474	0.00747632	0.00448446	0.00463373	0.00358641	0.00725624	0.00201869	8.14458e-05	0.00189444	0.00149186	0.00343743	0.00409816	0.00669171	6.8683e-05	0.0023644	0.00529563	0.00136024	0.00255031	0.00496417	0.00391002	0.00168252
Pleckstrin homology domain-containing family A member 6	PLEKHA6	Q9Y2H5	5			0	1.42039e-05	0	0	0	0	0	3.40266e-05	0	0	0	0	0	2.03579e-05	0	0	0	0	1.71982e-05	0	1.06217e-05	0	0	0	0	0	0	0	0	1.84449e-05	0	0	0	0	0
Plasminogen;Plasmin heavy chain A;Activation peptide;Angiostatin;Plasmin heavy chain A, short form;Plasmin light chain B	PLG	P00747	17			0	5.71769e-05	0	0	0	0	0	1.09463e-05	0	0	1.37654e-05	0	0	0	0	0	0	2.37672e-05	4.32847e-05	0	3.9098e-05	8.15506e-05	1.82739e-05	0.000158851	0	0	0	0	0	2.56516e-05	7.1507e-05	0	0	1.01909e-05	0.000173845
Perilipin-3	PLIN3	O60664	14			0	0.000168076	0	4.29234e-05	0	0.000201324	2.04263e-05	0.000175947	0	0	1.56517e-05	0	0	6.1491e-05	0	2.75661e-05	2.92824e-05	0.000242845	1.29095e-05	0	9.05345e-05	4.06764e-06	4.63288e-05	2.27856e-05	0	0	5.88465e-05	0	0	4.6957e-05	0	0	0.000381618	9.11186e-05	2.71075e-05
Proteolipid protein 2	PLP2	Q04941	1			0	0	0	0.000394661	0	0	0	0	0	0	5.83561e-05	0	0	0	0	0.000341765	0	0	5.40553e-05	0	8.1424e-05	0	3.63558e-05	2.4749e-05	0	0.000173015	0	0	0.000109748	0	0	0	0	0	0
Pleiotropic regulator 1	PLRG1	O43660	1			0	0	0	0	0	0	0	0	0	0	0	0	0	0	0	0	0	0	0	0	0	0	0	0	0	0	0	0	0	0	0	0	3.95226e-05	0	0
Plastin-1	PLS1	Q14651	25			0	0.000423964	0	0.000191843	0.000129461	0.00124059	6.34195e-05	0.000311544	0	0	0.000225344	0	0.000132271	0.000293852	0	0.000124909	4.66348e-05	0.000442493	0.00035705	0	0.000248594	0	0.000667579	0.000123018	0	0.00101099	0.000126332	0	5.51897e-05	0.000559611	0.000223001	3.46757e-05	0.000213297	0.000570981	0.000275004
Plastin-3	PLS3	P13797	7			0	0	0	0	0	0	0	0	0	0	0	0	0	0	0	0	0	0	0	0	0	0	0	0	0	0	0	0	0	0	0	0	0	1.34648e-05	0
Plexin-B2	PLXNB2	O15031	2			0	0	0	0	0	9.23695e-06	0	0	0	0	0	0	0	0	0	0	0	0	0	0	0	0	0	0	0	0	2.10594e-05	0	0	1.44828e-05	0	0	0	0	0
Protein PML	PML	P29590	2			0	0	0	0	0	0	0	0	0	0	0	0	0	0	0	0	0	0	0	0	0	0	0	0	0	0	0	0	0	6.86953e-06	0	0	0	0	0
Phosphomannomutase 2	PMM2	O15305	5			0	2.53684e-05	0	0	0	4.34291e-06	0	0	0	0	3.89693e-05	0	0	0	0	0	0	0	2.5401e-05	0	1.21168e-05	0	7.21609e-05	0	0	7.86919e-05	0	0	0	0	2.56497e-05	0	0	3.93517e-05	8.53909e-05
Mitochondrial-processing peptidase subunit beta	PMPCB	O75439	1			0	0	0	0	0	0	0	0	0	0	0	0	0	1.9068e-05	0	0	0	0	0	0	0	0	0	0	0	0	0	0	0	0	0	0	0	0	0
Pinin	PNN	Q9H307	8	Desmosome		5.06211e-05	0	0	2.91542e-05	0	1.61468e-05	0	2.32901e-05	0	0	1.40544e-05	0	2.44432e-05	1.24405e-05	0	6.69036e-05	6.00537e-05	1.63447e-05	0	0	3.82528e-05	0	8.07861e-06	0	0	9.45972e-06	4.5181e-05	0	3.27977e-05	2.23143e-05	0	0	0	7.01466e-06	0
Purine nucleoside phosphorylase	PNP	P00491	6			0	0	0	0	0	0	0	0	0	0	1.86573e-05	0	0	0	0	0	0	0	1.19961e-05	0	2.28823e-05	0	2.28391e-05	0	0	1.13519e-05	0	0	0	0	2.01698e-05	0	0	0.000104697	5.3219e-06
Polyribonucleotide nucleotidyltransferase 1, mitochondrial	PNPT1	Q8TCS8	6			0	0	0	3.01511e-05	0	0	0	0	0	0	9.95223e-06	0	0	2.28791e-05	0	2.12993e-05	6.13813e-05	2.65827e-05	0	0	0	0	0	0	0	0	8.37328e-05	0	0	0	0	0	0	5.62265e-06	8.09117e-06
Protein POF1B	POF1B	Q8WVV4	34			0.000805266	0.000419662	0.00101922	0.000625002	0.000580135	0.0015246	0.000384279	0.00120641	0.00105932	0	0.000222803	0.000498403	0.000543602	0.000729348	0.000394778	0.000892522	0.00107308	0.000436758	0.000327635	0.000982364	0.000644539	0	0.00040742	0.000342719	0.000808276	0.00119964	0.00126672	2.00336e-05	0.00214911	0.000770706	0.000189264	0.000491497	0.000771793	0.000400963	0.00026062
DNA-directed RNA polymerase II subunit RPB1	POLR2A	P24928	1			0	0	0	0	0	0	0	6.33264e-06	0	0	0	0	0	0	0	0	0	0	0	0	0	0	0	0	0	0	0	0	0	0	0	0	0	0	0
DNA-directed RNA polymerases I, II, and III subunit RPABC1	POLR2E	P19388	2			0	0	0	0	0	0	0	1.23323e-05	6.20709e-05	0	0	0	0	0	0	0	0	0	0	0	0	0	0	0	0	0	0	0	0	0	0	0	2.16086e-05	0	0
Serum paraoxonase/arylesterase 1	PON1	P27169	2			0	0	0	0	0	0	0	0	0	0	0	0	0	0	0	0	0	0	0	0	0	0	0	3.57683e-05	0	0	0	0	0	0	0	0	0	0	0
Periostin	POSTN	Q15063;CON__Q2KJC7	10			0	0	0	0	0	0	0	0	0	0	0	0	0	0	0.00117909	0	0	0	0	0	0	0	0	4.27667e-05	0	0	0	0	0	0	0	0	0	0	0
Inorganic pyrophosphatase	PPA1	Q15181	10			7.92139e-05	9.28378e-05	0	5.46928e-05	0	0.000171479	7.43017e-05	0.000118011	0.000238985	0	3.59628e-05	0	0	4.34498e-05	0	0	0	7.46562e-05	6.66902e-06	0	7.59039e-05	0	8.53637e-05	0.000100641	0	4.79502e-05	0	0	0	9.68659e-05	3.03229e-05	3.49404e-05	0.000216329	6.05427e-05	1.00806e-05
Inorganic pyrophosphatase 2, mitochondrial	PPA2	Q9H2U2	9			0	0	0	0	0	1.59794e-05	0	0	0	0	0.000392319	0	0	3.73905e-05	0	0	0	0	0.000169184	0	0.000162173	0	0.000497155	0.000218661	0	0.000264686	0	0	0.000224125	1.64091e-05	5.06779e-05	0	0	0.000163576	0.000257658
Platelet basic protein;Connective tissue-activating peptide III;TC-2;Connective tissue-activating peptide III(1-81);Beta-thromboglobulin;Neutrophil-activating peptide 2(74);Neutrophil-activating peptide 2(73);Neutrophil-activating peptide 2;TC-1;Neutrophil-activating peptide 2(1-66);Neutrophil-activating peptide 2(1-63)	PPBP	P02775	2			0	0	0	0	0	0	0	0	0	0	0	0	0	2.5823e-05	0	0	0	0	0	0	0	0	0	0	0	0	0	0	0	0	0	0	0	0	0
Peptidyl-prolyl cis-trans isomerase A;Peptidyl-prolyl cis-trans isomerase A, N-terminally processed	PPIA	P62937	18			0.000224584	0.00329711	0.000586586	0.00105796	0.00118689	0.00376871	0.00117081	0.00597851	0.000967888	0	0.00201784	0	0.0012278	0.00273698	0	0.000186209	0.000567995	0.00187637	0.00123601	0	0.00301948	0.00186447	0.00337552	0.00171663	0	0.00112375	8.22112e-05	0.00203939	0.00153776	0.00260703	0.00119245	0.00223144	0.0075546	0.00262518	0.000750154
Peptidyl-prolyl cis-trans isomerase B	PPIB	P23284	25			0.000469999	0.00053601	0.000333194	0.001308	0.000750801	0.000723179	0.000517978	0.000609217	0.000244716	0	0.00043945	0.000779202	0.00048705	0.000645911	0	0.000551587	0.000397903	0.000810627	0.000259708	0.000215238	0.000470235	7.20008e-05	0.000427933	0.000749009	0.000227337	0.000960565	0.000358385	0	0.000922819	0.00137509	0.000122157	0.000572777	0.0014155	0.000742528	0.000231746
Peptidyl-prolyl cis-trans isomerase C	PPIC	P45877	1			0	0	0	0	0	0	0	0	0	0	0	0	0	0	0	0	0	0	0	0	0	0	1.36736e-05	0	0	0	0	0	0	0	0	0	0	2.44187e-05	0
Peptidyl-prolyl cis-trans isomerase F, mitochondrial	PPIF	P30405	6			0	0	0	0	0	0.000129395	0.000151796	0.000181249	0	0	0	0	0.000241603	0	0	0	0	0	0	0	0.000159168	0	0	0	0	0.000224098	0	0	0.000146955	0	0	0.000174246	2.44421e-05	0	0
Periplakin	PPL	O60437	5			0	0	0	0	0	0	0	6.96888e-05	0	0	0	0	0	0	0	0	0	0	0	0	0	0	0	0	0	0	0	0	0	0	0	0	0	0	0
Protein phosphatase 1B	PPM1B	O75688	3			0	3.32354e-05	0	0	0	0	0	0	0	0	0	0	0	0	0	0	0	0	0	0	0	0	0	0	0	0	0	0	0	0	0	1.51398e-05	1.37419e-05	0	0
Protein phosphatase 1G	PPM1G	O15355	6			0	0	0	0	0	0	0	0	0	0	2.75505e-06	0	0	0	0	0	0	9.97889e-06	0	0	8.74575e-06	0	0	0	0	0	0	0	0	6.36277e-06	0	0	1.32633e-05	0	0
Serine/threonine-protein phosphatase PP1-alpha catalytic subunit	PPP1CA	P62136	4			0	2.10825e-05	0	2.14022e-05	0	0	0	1.52766e-05	0	0	0	0	0	0	0	0	0	1.03688e-05	0	0	0	0	0	9.9294e-06	0	0	0	0	0	9.58287e-06	0	0	0	3.52755e-05	2.72986e-05
Serine/threonine-protein phosphatase PP1-beta catalytic subunit	PPP1CB	P62140	4			4.43759e-05	0	0	1.50626e-05	0	1.13235e-05	0	8.82311e-06	0	0	1.04153e-05	0	0	1.12018e-05	0	0	0	0	0	0	1.78056e-05	0	0	0	0	1.87063e-05	0	0	1.05656e-05	1.52288e-05	0	0	0	0	9.91671e-06
Protein phosphatase 1 regulatory subunit 12A	PPP1R12A	O14974	4			4.94584e-05	0	0	0	0	1.34124e-05	0	0	0	0	0	0	0	0	0	0	0	0	0	0	0	0	0	0	0	0	0	0	0	2.79064e-05	0	0	0	0	0
Protein phosphatase 1 regulatory subunit 12B	PPP1R12B	O60237	1			0	0	0	0	0	0	0	0	0	0	0	0	0	0	0	0	0	0	0	0	0	0	0	0	0	0	0	0	0	0	0	0	0	0	0
Protein phosphatase 1 regulatory subunit 14B	PPP1R14B	Q96C90	1			0	0	0	0	0	0	0	2.08573e-05	0	0	0	0	0	0	0	0	0	0	0	0	0	0	0	0	0	0	0	0	0	0	0	0	2.94098e-05	0	0
Protein phosphatase 1 regulatory subunit 1B	PPP1R1B	Q9UD71	6			0.000119011	1.57046e-05	0	3.78617e-05	4.98812e-05	0	1.59286e-05	0.000178963	0.000308859	0	0	0	6.92417e-05	0	0	0	7.39647e-05	0	0	0	2.49848e-05	1.8135e-05	0	0	0	0	4.11496e-05	0	0	6.81452e-06	0	0	4.69762e-05	1.16858e-05	0
Protein phosphatase 1 regulatory subunit 7	PPP1R7	Q15435	7			0	0	0	0	0	1.91018e-05	0	0	0	0	0	0	0	0	0	0	0	1.48542e-05	0	0	0	0	0	9.19524e-06	0	0	0	0	6.09238e-06	1.30191e-05	0	0	7.90272e-05	1.65492e-05	0
Serine/threonine-protein phosphatase 2A catalytic subunit alpha isoform	PPP2CA	P67775	3			0	0	0	0	0	0	0	0	0	0	0	0	0	0	0	0	0	0	0	0	0	0	0	0	0	0	0	0	0	0	0	0	0	3.75354e-06	0
Serine/threonine-protein phosphatase 2A catalytic subunit beta isoform	PPP2CB	P62714	3			0	0	0	0	0	0	0	0	0	0	0	0	0	0	0	0	0	0	0	0	2.53463e-06	0	3.95491e-06	4.30761e-06	0	0	0	0	0	0	0	0	0	5.79015e-06	0
Serine/threonine-protein phosphatase 2A 65 kDa regulatory subunit A alpha isoform	PPP2R1A	P30153	9			0	2.88027e-05	0	0	0	0.000106455	0	0	0	0	4.49672e-05	0	0	0	0	0	0	0	2.66094e-05	0	2.72744e-05	0	5.57903e-05	3.48204e-05	0	8.53994e-05	0	0	0	0	0	0	4.7459e-05	0.000133483	3.73307e-05
Serine/threonine-protein phosphatase 2A 55 kDa regulatory subunit B alpha isoform	PPP2R2A	P63151	3			0	0	0	0	0	0	0	0	0	0	0	0	0	0	0	0	0	0	0	0	0	0	0	0	0	0	0	0	0	0	0	0	0	0	0
Serine/threonine-protein phosphatase 2B catalytic subunit alpha isoform	PPP3CA	Q08209	3			0	0	0	0	0	0	0	0	0	0	0	0	0	0	0	0	0	0	0	0	0	0	0	0	0	3.18842e-05	0	0	0	0	0	0	0	0	0
Peroxiredoxin-1	PRDX1	Q06830	21			0.0014477	0.00326775	0.00139554	0.00142728	0.00221072	0.00170595	0.000534866	0.00296974	0.00139945	0.000335461	0.00152856	0.000964224	0.00144988	0.00193927	0.00107797	0.00137861	0.00124676	0.00243001	0.00145441	0.000629186	0.00193666	0.00142056	0.00220097	0.00171298	0.000715429	0.00151866	0.00153537	0.000698153	0.000565327	0.00340487	0.00060865	0.00142992	0.00243174	0.00356567	0.00153243
Peroxiredoxin-2	PRDX2	P32119	19			0	0.0017643	0	0.000576681	0.000875977	0.00122933	0.000715237	0.000784329	7.66568e-05	0	0.00182007	0	0.000519481	0.00226751	0	0.000456163	0.000285495	0.00358089	0.000773598	0	0.00103927	0.000760379	0.00196162	0.00165824	0.000197895	0.000542003	0.000196632	0.0013148	0.000493237	0.00232356	0.00146918	0.000405643	0.00119099	0.00220569	0.00324032
Thioredoxin-dependent peroxide reductase, mitochondrial	PRDX3	P30048	9			0	5.00268e-05	0	0	5.1399e-05	9.99397e-05	0	0.000250028	0	0	0.000260699	0	3.13535e-05	1.46045e-05	0	8.4683e-05	0	0.000199805	2.76588e-05	0	0.000147704	0	0.000260627	0.000157534	0	0.000165624	0	0	0.000125085	7.57164e-05	0	0	0.000178358	0.000118597	0.000111099
Peroxiredoxin-4	PRDX4	Q13162	6			0	3.67958e-05	0	5.04521e-05	0	0	0	2.17465e-05	0	0	0	0	0	4.85849e-05	0	3.76489e-05	0	0.00010034	0	0	0	0	0	0	0	0	0	0	0	2.31248e-05	0	0	0.000324419	0	0
Peroxiredoxin-5, mitochondrial	PRDX5	P30044	13			0.00047434	0.000161986	0.000138957	0.000300961	0.000257291	0.000794341	0.000408222	0.000992285	0.000187603	0	0.00122029	0.000192607	0.000524108	0.000320276	0	0.000184384	9.05558e-05	0.000318922	7.09133e-05	0	0.0015013	0.000471244	0.00117331	0.000803241	9.32633e-05	0.000302821	0.000281842	0	0.000901718	0.000221417	6.6186e-05	0.000663986	0.000749734	0.000754395	0.000272113
Peroxiredoxin-6	PRDX6	P30041	20			0	0.000534144	0	0.000130058	0.000604365	0.000503201	0	0.000318297	0.000161466	0	0.000406373	0	0.00012645	0.000495416	0	0.000139389	0	0.000245249	0.000161112	0	0.00036736	1.39692e-05	0.000650047	0.000134086	0	0.000389644	0	4.91955e-05	5.50987e-05	0.000227022	0.000431349	6.31591e-05	0.00043346	0.000811314	0.000580663
Prolargin	PRELP	P51888	5			0	0	0	0	0	0	0	0	0	0.000159496	0	0	0	0	0	0	0	0	0	0	0	0	0	0	0	0	0	0	0	0	0	0	0	0	0
Prolyl endopeptidase	PREP	P48147	4			0	0	0	0	0	0	0	0	0	0	3.68053e-06	0	0	0	0	0	0	0	0	0	0	0	1.7368e-05	0	0	1.17672e-05	0	0	0	0	6.86629e-06	0	0	1.56119e-05	0
Proteoglycan 3	PRG3	Q9Y2Y8	1			0	0	0	0	0	0	0	0	0	0	0	0	0	0	0	0	0	0	0	0	0	0	0	0	0	0	0	0	0	0	0	0	0	0	0
5-AMP-activated protein kinase subunit beta-1	PRKAB1	Q9Y478	1			0	0	0	0	0	0	0	0	0	0	0	0	0	0	0	0	0	0	0	0	5.95251e-06	0	0	0	0	0	0	0	0	0	0	0	0	0	0
cAMP-dependent protein kinase type I-alpha regulatory subunit;cAMP-dependent protein kinase type I-alpha regulatory subunit, N-terminally processed	PRKAR1A	P10644	8			0	1.38646e-05	0	4.08031e-05	6.89018e-05	0.000110334	4.86221e-05	4.05404e-05	0	0	1.01866e-05	0	0	0	0	0.000181004	0	4.00786e-05	0	0	0	0	2.08952e-05	4.72589e-05	0	5.28123e-05	6.0513e-05	0	6.0725e-05	2.92916e-05	0	7.21587e-05	1.99985e-05	2.73597e-05	8.70346e-05
cAMP-dependent protein kinase type II-alpha regulatory subunit	PRKAR2A	P13861	13			0.00014241	6.39435e-05	0.000176052	7.43712e-05	0	7.04195e-05	0	0.000211568	0.000154489	0	4.15381e-05	0	0	7.78899e-05	0	0.000155907	0	0	4.36717e-05	0	2.082e-05	0	5.16436e-05	3.51467e-05	0	6.9088e-05	0.000172772	0	3.51585e-05	7.61777e-05	3.78715e-05	5.01157e-05	4.45452e-05	1.69898e-05	1.57019e-05
cAMP-dependent protein kinase type II-beta regulatory subunit	PRKAR2B	P31323	3			0	0	0	0	0	0	0	0	0	0	0	0	0	0	0	0	0	0	0	0	0	0	0	5.07384e-07	0	0	0	0	0	0	0	0	0	0	0
Protein kinase C delta type;Protein kinase C delta type regulatory subunit;Protein kinase C delta type catalytic subunit;Protein kinase C theta type	PRKCD;PRKCQ	Q05655;Q04759	2			0	0	0	0	0	0	0	0	0	0	0	0	0	0	0	0	0	0	0	0	0	0	0	0	0	2.72652e-05	0	0	0	0	0	0	0	9.18117e-06	0
Protein kinase C delta-binding protein	PRKCDBP	Q969G5	9			0	0	0	0	0	0	0	0	0	0.0011693	0	0	0	0	0	0	0	0	0	0	0	0	0	0	0	0	0	0	0	0	0	0	0	0	0
Glucosidase 2 subunit beta	PRKCSH	P14314	23			0.00282982	0.000737506	0.00267899	0.00237211	0.000697844	0.000899876	0.000935429	0.000979156	0.00179708	0.000820824	0.00128269	0.00178587	0.00162268	0.000635259	0.00323869	0.00124434	0.00156068	0.00110384	0.000654302	0.00173529	0.00115456	0.000218275	0.00061576	0.000618717	0.00114841	0.00163449	0.00231379	5.89242e-05	0.00140134	0.00189346	0.000484778	0.00163143	0.00103648	0.000810737	0.000594847
DNA-dependent protein kinase catalytic subunit	PRKDC	P78527	3			0	0	0	0	0	0	0	0	0	0	0	0	0	0	0	0	0	0	0	0	0	0	0	0	0	1.54349e-05	0	0	0	0	0	0	0	0	0
Endothelial protein C receptor	PROCR	Q9UNN8	2			0	0	0	0	0	0	0	0	0	0	0	0	0	0	0	0	0	0	0	0	0	0	1.16278e-05	0	0	0	0	0	0	0	0	0	0	0	0
Proline synthase co-transcribed bacterial homolog protein	PROSC	O94903	4			0	2.8065e-05	0	0	0	3.68883e-05	0	3.59523e-05	0	0	2.89333e-05	0	0	0	0	0	0	0	8.44664e-05	0	0	0	1.77177e-05	1.32885e-05	0	0	0	0	1.66347e-05	0	3.06435e-05	0	1.01846e-05	4.58355e-05	2.77966e-05
Pre-mRNA-processing factor 19	PRPF19	Q9UMS4	3			0	0	0	2.82209e-05	0	0	0	0	0	0	0	0	0	0	0	0	0	0	0	0	1.1454e-05	0	1.88948e-05	1.51819e-05	0	0	0	0	0	0	0	0	0	0	0
Pre-mRNA-processing factor 40 homolog A	PRPF40A	O75400	2			0	0	0	3.05048e-05	0	0	0	0	0	0	0	0	0	0	0	0	8.38281e-05	0	0	0	0	0	1.24642e-05	1.02501e-06	0	0	0	0	0	0	0	0	0	0	0
Peripherin	PRPH	P41219	27			0	0	0	0	0	0	0	0	0	0.00222689	0	0	0	0	0	0	0	0	0	0	0	0	0	0	0	0	0	0	0	0	0	0	0	0	0
Ribose-phosphate pyrophosphokinase 2	PRPS2	P11908	1			0	0	0	0	0	0	0	0	0	0	0	0	0	0	0	0	0	0	0	0	0	0	0	0	0	0	0	0	0	0	0	0	0	0	0
Proline-rich protein 15-like protein	PRR15L	Q9BU68	1			4.3526e-05	0	0	0	0	0	0	0	0	0	0	0	0	0	0	0	0	0	0	0	0	0	0	0	0	0	0	0	0	3.02335e-05	0	0	0	0	0
Protein PRRC1	PRRC1	Q96M27	1			0	0	0	0	0	0	0	0	0	0	1.16833e-06	0	0	0	0	0	0	0	0	0	2.41332e-06	0	0	0	0	0	0	0	0	0	0	0	0	0	0
Prostasin;Prostasin light chain;Prostasin heavy chain	PRSS8	Q16651	2			0	0	0	0	0	0	0	0	0	0	0	0	0	0	0	3.13315e-05	0	0	0	0	1.29877e-05	0	0	0	0	0	0	0	0	0	0	0	0	0	0
Prosaposin;Saposin-A;Saposin-B-Val;Saposin-B;Saposin-C;Saposin-D	PSAP	P07602	12			0	0	0	0	0	1.49624e-05	0	0	0	0	0.000257395	0	0	4.04299e-05	0	0	0	0	8.22667e-05	0	0.000243324	0	0.000585355	0.000389637	0	0.000383173	0	0	0.000114249	0	3.54356e-05	0	0	0.000193905	6.5755e-05
PC4 and SFRS1-interacting protein	PSIP1	O75475	1			0	0	0	0	0	0	0	0	0	0	4.09808e-06	0	0	0	0	0	0	0	0	0	0	0	0	0	0	0	0	0	0	0	0	0	0	0	0
Proteasome subunit alpha type-1	PSMA1	P25786	14			0	0.00015292	0	2.48155e-05	0	0.000129914	5.10534e-05	0.00010916	0	0	0.000112964	0	2.97508e-05	6.96676e-05	0	0.00015807	0.000128474	9.48521e-05	0.000185208	0	7.6345e-05	4.83611e-05	0.000157786	0.000171646	0	0.000127914	0.000103274	3.71293e-05	7.79272e-05	9.93914e-05	0.000129174	7.39335e-05	0.000511208	0.000176797	0.000181999
Proteasome subunit alpha type-2	PSMA2	P25787	5			0	2.35182e-05	0	0	5.58713e-05	2.35614e-05	8.6408e-05	7.34367e-05	0	0	0	0	3.44331e-05	0	0	6.114e-05	0	1.91405e-05	0	0	4.20593e-06	0	0	0	0	0	0	0	0	6.68966e-05	0	0	9.99849e-05	0	0
Proteasome subunit alpha type-3	PSMA3	P25788	6			0	6.35047e-06	0	0	0	0	0	7.4304e-06	0	0	4.06862e-05	0	0	0	0	0	0	8.1401e-06	6.30068e-05	0	0	0	0	0	0	0	0	3.60656e-05	0	7.41947e-06	6.3531e-05	0	0	4.52406e-05	0
Proteasome subunit alpha type-4	PSMA4	P25789	5			0	9.82967e-05	0	8.05365e-05	0.000164546	0	0	0	0	0	1.04078e-05	0	8.10957e-05	0	0	0	0	5.77504e-05	9.53467e-06	0	2.4902e-05	0	3.00834e-05	1.56463e-05	0	1.04752e-05	0	0	6.56176e-06	1.50807e-05	1.14014e-05	0	0	3.91448e-05	1.14094e-05
Proteasome subunit alpha type-5	PSMA5	P28066	7			0	2.41989e-05	0	0	5.64905e-05	1.35256e-05	2.74828e-05	1.54175e-05	0.000118324	0	6.62939e-05	0	0	0	0	2.83729e-05	0	4.07374e-05	2.26014e-05	0	0.000128294	2.50668e-05	8.07585e-05	7.74521e-05	0	5.06657e-05	0	0	5.75041e-05	2.37897e-05	1.45096e-05	0	4.13788e-05	8.58152e-05	2.05433e-05
Proteasome subunit alpha type-6	PSMA6	P60900	14			0.000122831	6.389e-05	0	6.42138e-05	0.000152479	2.74273e-05	7.56957e-05	3.92451e-05	9.31758e-05	0	3.99059e-05	0.000116902	6.98212e-05	7.0108e-05	0	0.000107747	7.78252e-05	5.34246e-05	9.78131e-05	0	0.000102963	2.22903e-05	5.83599e-05	6.84172e-05	0	9.9591e-05	8.30249e-05	0	2.94096e-05	0.000179424	3.67947e-05	6.38061e-05	9.12614e-05	9.86011e-05	0
Proteasome subunit alpha type-7	PSMA7	O14818	12			6.05292e-05	6.41163e-05	0	0.000109653	4.77236e-05	0.000197904	5.30819e-05	0.000216682	0	0	0.00012569	0	5.19302e-05	4.42699e-05	0	8.35507e-05	7.2178e-05	0.000107917	0.000147136	0	0.000165515	7.29734e-05	2.10728e-05	7.01949e-05	0	0.000161925	6.09478e-05	0	5.17719e-05	0.000154775	4.55515e-05	7.14758e-05	5.06517e-05	0.00012464	0.000124746
Proteasome subunit beta type-1	PSMB1	P20618	6			0	9.30019e-06	0	0	0	0	0	0	0	0	7.68975e-06	0	0	0	0	0	0	9.24602e-06	0	0	2.08601e-05	0	0	3.43507e-05	0	0	0	0	0	1.57352e-05	0	0	0	4.48405e-05	0
Proteasome subunit beta type-10	PSMB10	P40306	2			0	0	0	0	0	0	0	0	0	0	0	0	0	0	0	0	0	0	0	0	0	0	0	0	0	0	0	0	0	0	0	0	0	0	0
Proteasome subunit beta type-4	PSMB4	P28070	2			0	0	0	0	0	0	0	0	0	0	0	0	0	0	0	0	0	0	0	0	0	0	0	0	0	0	0	0	0	0	0	0	0	1.23774e-05	0
Proteasome subunit beta type-6	PSMB6	P28072	5			0	3.44499e-05	0	0	0	0	0	0.000149948	0.000144613	0	0	0	6.54596e-05	0	0	0	0	0	0	0	3.28307e-05	0	0	2.37929e-05	0	0	0	0	0	0	0	0	2.88318e-05	2.20464e-05	0
Proteasome subunit beta type-7	PSMB7	Q99436	5			0	0	0	0	0	5.43446e-05	0	0	0	0	3.73663e-05	0	0	4.60553e-05	0	0	0	0	0	0	0	0	3.03058e-05	4.2221e-05	0	0	0	0	0	0.000108821	0	0	0	0.000146951	2.75912e-05
Proteasome subunit beta type-8	PSMB8	P28062	1			0	0	0	0	0	0	0	0	0	0	0	0	0	0	0	0	0	0	0	0	2.42561e-05	0	0	1.40137e-05	0	0	0	0	0	0	0	0	0	0	0
Proteasome subunit beta type-9	PSMB9	P28065	2			0	0	0	0	0	0	0	0	0	0	0	0	0	0	0	0	0	0	0	0	0	0	0	0	0	0	0	0	0	0	0	0	0	0	0
26S protease regulatory subunit 4	PSMC1	P62191	3			0	4.86862e-05	0	0	3.48452e-05	4.18608e-06	0	0	0	0	0	0	0	0	0	0	0	0	0	0	0	0	0	0	0	0	0	0	0	0	0	9.42107e-05	0	6.78887e-06	1.27378e-05
26S protease regulatory subunit 7	PSMC2	P35998	9			4.27217e-05	4.37559e-05	0	6.27186e-05	4.0521e-05	1.34595e-05	3.37158e-05	5.28883e-05	0	0	0	0	1.61792e-05	4.25885e-05	0	3.00602e-05	3.3594e-05	4.29711e-05	6.76062e-06	0	2.17471e-05	0	2.43962e-05	4.94529e-06	0	6.69102e-06	4.69629e-05	0	0	2.09008e-05	0	0	5.12423e-05	3.00293e-05	0
26S protease regulatory subunit 6A	PSMC3	P17980	14			8.33005e-05	5.70646e-05	0	0	5.65536e-05	9.31891e-06	5.02639e-05	1.2658e-05	5.79254e-05	0	1.8132e-05	0	4.7043e-05	3.12944e-05	0	0	7.3354e-05	4.02118e-05	0	0	3.26773e-05	0	0	2.65635e-05	0	1.46633e-05	0	0	0	0	0	4.81388e-05	0.000110415	8.15147e-05	2.66791e-05
26S protease regulatory subunit 6B	PSMC4	P43686	7			0	0	0	0	0	9.9645e-06	0	0	0	0	1.83956e-06	0	0	0	0	0	0	0	0	0	1.90565e-06	0	0	1.68296e-06	0	0	0	0	3.02715e-06	6.06177e-06	0	0	9.32519e-06	0	0
26S protease regulatory subunit 8	PSMC5	P62195	9			0	0	0	0	0	0	0	0	0	0	1.52159e-05	0	0	0	0	0	0	0	3.73414e-05	0	3.48962e-05	0	2.48312e-05	1.98762e-05	0	3.07217e-05	0	0	1.37131e-05	1.51e-05	7.55429e-06	0	2.88139e-05	2.46676e-05	0
26S protease regulatory subunit 10B	PSMC6	P62333	10			0	0	0	2.15367e-05	0	8.45989e-06	0	0	0	0	2.39661e-05	0	0	0	0	0	0	2.45384e-05	2.99509e-05	0	2.19214e-05	0	3.73649e-05	3.22016e-05	0	3.33681e-05	0	0	0	7.2249e-06	3.95456e-05	0	0	2.51827e-05	2.85399e-06
26S proteasome non-ATPase regulatory subunit 1	PSMD1	Q99460	4			0	0	0	0	0	0	0	0	0	0	0	0	0	0	0	0	0	0	0	0	0	0	0	0	0	3.26518e-05	0	0	0	1.25725e-05	0	0	0	0	0
26S proteasome non-ATPase regulatory subunit 11	PSMD11	O00231	4			5.92191e-05	0	3.99483e-05	0	2.81393e-05	0	2.82248e-05	9.86263e-06	4.21513e-05	0	2.00344e-06	4.70539e-05	2.85982e-05	0	0	0	1.02351e-05	0	0	0	2.29088e-06	0	1.15982e-05	1.16416e-05	0	0	2.50022e-05	0	0	0	0	0	5.29052e-05	1.16344e-05	0
26S proteasome non-ATPase regulatory subunit 2	PSMD2	Q13200	3			5.78557e-05	1.31233e-05	9.03758e-05	0	0	8.77531e-05	0	0	0	0	1.48545e-05	0	0	0	0	6.6091e-05	0	5.17082e-05	0	0	0	0	0	5.26258e-06	0	3.54209e-05	0	0	0	7.44562e-06	0	0	2.805e-05	5.29447e-05	0
26S proteasome non-ATPase regulatory subunit 3	PSMD3	O43242	6			0	2.5517e-05	0	0	0	1.11826e-05	0	0	0	0	1.76849e-05	4.12921e-05	0	0	0	0	0	0	6.70622e-06	0	7.858e-06	0	9.5042e-06	4.34812e-06	0	2.15574e-05	0	0	0	9.6089e-06	0	0	0	0	3.93909e-06
26S proteasome non-ATPase regulatory subunit 4	PSMD4	P55036	10			0	3.14077e-05	0	4.92846e-05	0	5.05064e-05	0	0.000139094	4.7578e-05	0	0	0	2.9868e-05	5.1364e-05	0	1.32635e-05	0	7.1926e-05	1.08534e-05	0	8.43002e-05	0	0	1.23411e-05	0	0	0	0	0	9.71623e-05	0	6.6758e-05	4.74093e-05	2.77693e-05	4.23126e-06
26S proteasome non-ATPase regulatory subunit 6	PSMD6	Q15008	4			0	0	0	0	0	4.47969e-05	0	4.87407e-05	0	0	1.31413e-05	0	0	0	0	0	0	3.3035e-05	2.02045e-05	0	1.39734e-05	0	1.40336e-05	2.13656e-05	0	3.23952e-05	0	0	0	0	0	0	6.4701e-05	2.4854e-05	1.49408e-05
26S proteasome non-ATPase regulatory subunit 7	PSMD7	P51665	1			0	0	0	0	0	0	0	1.71772e-05	0	0	0	0	0	0	0	0	0	2.198e-05	0	0	0	0	0	0	0	0	0	0	0	0	0	0	2.94425e-05	0	0
26S proteasome non-ATPase regulatory subunit 9	PSMD9	O00233	8			0	0	0	0	0	0	0	0	0	0	0	0	2.5325e-05	0	0	0	0	0	0	0	0	2.4427e-05	2.17495e-05	1.46528e-05	0	0	0	0	0	3.14331e-05	0	0	0	0	0
Proteasome activator complex subunit 1	PSME1	Q06323	17	Immunoproteasome; immune response	Immunoproteasome; immune response	0	0.000229222	0	0	0	4.32044e-05	6.1391e-05	0.00034751	0	0	0.000201012	0	0	9.73303e-05	0	8.5802e-05	0	0.000147595	0.000327441	0	0.000334791	9.94177e-05	0.000359689	0.000376839	0	0.00058933	0	0	0.00012886	0.000327138	0.000348603	0	9.77811e-05	0.00031969	0.000128971
Proteasome activator complex subunit 2	PSME2	Q9UL46	10			0	0	0	0	0	0	0	9.36541e-05	0	0	9.64161e-06	0	0	4.04126e-05	0	0	0	4.26974e-05	0	0	0	0	0	1.21341e-05	0	9.0005e-06	0	0	0	0.000157829	0	0	4.13619e-05	1.34743e-05	0
Paraspeckle component 1	PSPC1	Q8WXF1	6			0	0	0	0	1.14231e-05	0	0	0	0	0	0	0	0	0	0	1.62239e-05	0	0	0	0	0	0	0	5.40576e-06	0	0	0	0	0	2.69568e-05	0	0	2.79201e-05	0	0
Polypyrimidine tract-binding protein 1	PTBP1	P26599	14			0	0.000153076	0	0.000104226	0	0.000242058	6.36344e-05	0.000363082	0	0	0.000131931	0	2.89463e-05	9.94694e-05	0	0	0	0.000232072	0.00016843	0	0.000245083	9.46847e-05	0.000206584	4.28792e-05	0	0.000258104	1.96259e-05	8.26535e-05	0.000111553	0.000214639	8.62944e-05	0	0.000320552	0.000185199	0.000106241
Prostaglandin E synthase 2;Prostaglandin E synthase 2 truncated form	PTGES2	Q9H7Z7	2			0	1.65861e-05	0	0	0	0	0	1.42319e-05	0	0	0	0	0	0	0	0	0	0	0	0	0	0	2.32707e-05	0	0	0	0	0	0	0	0	0	0	0	0
Prostaglandin E synthase 3	PTGES3	Q15185	6			0	5.36804e-05	0	0	0	5.32332e-05	0	0	0	0	0.000159125	0	0	0	0	0	0	0	0.00031626	0	0.000244569	0.000241998	0.000149519	8.65911e-05	0	0.000189232	0	0	0.000199327	0	3.96278e-05	0	4.40771e-05	0.000186748	4.22028e-05
Prostaglandin F2 receptor negative regulator	PTGFRN	Q9P2B2	2			0	0	0	0	0	0	0	0	0	0	0	0	0	0	0	0	0	0	0	0	0	0	0	2.2225e-06	0	0	2.25119e-05	0	0	0	0	0	0	0	0
Prostaglandin reductase 1	PTGR1	Q14914	2			0	0	0	0	0	0	0	0	0	0	9.35009e-06	0	0	0	0	0	0	0	0	0	0	0	4.85508e-05	7.99753e-06	0	1.89654e-05	0	0	0	0	0	0	0	1.67488e-05	3.3792e-05
Prothymosin alpha;Prothymosin alpha, N-terminally processed;Thymosin alpha-1	PTMA	P06454	10			0.00811053	0.000926425	0.00368764	0.00157736	0.00243691	0.000529467	0.00268577	0.00223842	0.00425054	0.00286266	0.000629411	0.00744689	0.00253376	0.00116986	0.00103931	0.000995317	0.00538556	0.00115318	0.0011319	0.00647771	0.00139526	0.00185194	0.00115707	0.000420635	0	0.000836166	0.0033118	0.000764216	0.000966953	0.000430489	0.00129621	0.00220435	0.0021187	0.00127281	0.000418819
Parathymosin	PTMS	P20962	10			0.000226696	0.000109247	0	0.000130883	0.000118212	2.28268e-05	0.000219203	0.000175393	0	0.000364563	0.000216007	0	0.00037408	7.56553e-05	0.000898109	5.42307e-05	0.000477546	7.06363e-05	8.50018e-05	0.00040886	0.000234848	0.000395306	0.000253737	8.3542e-05	0.000337904	0.00015517	0.000623523	0	0.000204881	0.000272802	0.000284269	0.000379413	0.000103931	0.00021944	9.83989e-05
Tyrosine-protein phosphatase non-receptor type 6	PTPN6	P29350	2			0	0	0	0	0	0	1.87476e-05	0	0	0	0	0	0	0	0	0	0	0	0	0	0	0	9.88073e-06	0	0	0	0	0	0	0	0	0	0	0	0
Polymerase I and transcript release factor	PTRF	Q6NZI2	16			0	0	0	0	0	9.71628e-06	3.40556e-05	0	0	0.00594298	4.78014e-05	0	0	0	0	0	0	0	0	0	7.08618e-05	0.00011355	0	4.35543e-05	0	0	0	0	0	7.88037e-06	1.39099e-05	0	0	0	0
Putative peptidyl-tRNA hydrolase PTRHD1	PTRHD1	Q6GMV3	2			0	0	0	0	0	0	0	0	0	0	1.72246e-05	0	0	0	0	0	0	0	0	0	1.80209e-05	0	2.07851e-05	0	0	1.02472e-05	0	0	1.24194e-05	0	8.90097e-06	0	0	2.46104e-05	2.04984e-05
Poly(U)-binding-splicing factor PUF60	PUF60	Q9UHX1	3			0	0	0	0	0	0	0	2.08113e-05	0	0	0	0	0	0	0	0	0	0	0	0	7.84948e-06	0	0	1.08388e-05	0	0	0	0	0	0	0	0	4.24649e-05	0	0
Transcriptional activator protein Pur-alpha	PURA	Q00577	2			0	8.60348e-06	0	0	0	7.12626e-05	0	4.56054e-05	0	0	0	0	0	2.59987e-05	0	0	0	3.42705e-05	0	0	0	0	0	0	0	0	0	0	0	0	0	0	4.8432e-05	0	0
Transcriptional activator protein Pur-beta	PURB	Q96QR8	2			0	0	0	0	0	0	0	0	0	0	0	0	0	0	0	0	0	0	0	0	0	0	0	0	0	0	0	0	0	0	0	0	0	0	0
Apoptosis-associated speck-like protein containing a CARD	PYCARD	Q9ULZ3	1			0	0	0	0	0	0	0	0	0	0	0	0	0	0	0	0	0	0	0	0	0	0	0	0	0	0	0	0	0	0	0	0	0	0	0
Pyrroline-5-carboxylate reductase 1, mitochondrial	PYCR1	P32322	1			0	0	0	0	0	0	0	0	0	0	0	0	0	0	0	0	0	0	0	0	0	0	0	0	0	0	0	0	0	0	0	0	5.16596e-05	0	0
Glycogen phosphorylase, brain form	PYGB	P11216	22			0.000210728	0.000271218	7.52816e-05	6.61308e-05	0	0.000363694	0	0	0.000252939	0	8.50105e-05	0.000175314	0	0.000146714	8.26337e-05	0	0	0.000305141	3.11164e-05	0	0	0	0.000134396	4.88538e-05	0	0.000482916	3.10719e-05	0	0	0.000117165	2.87721e-05	0	0	0.00014316	4.26996e-05
Pregnancy zone protein	PZP	P20742	8			0	0	0	0	0	0	0	0	0	0	0	0	0	0	0	0	0	0	0	0	2.84731e-05	0	0	0	0	0	0	0	0	0	0	0	0	1.25953e-05	3.38935e-06
Glutamine--tRNA ligase	QARS	P47897	3			0	0	0	0	0	0	0	0	0	0	0	0	0	0	0	2.02389e-05	0	0	0	0	0	0	0	0	0	2.80083e-05	0	0	0	0	0	0	0	2.31254e-05	0
Dihydropteridine reductase	QDPR	P09417	3			0	0	0	3.76846e-05	0	0	0	5.66603e-05	0	0	0	0	2.75336e-05	4.15884e-05	0	0	3.40844e-05	3.07888e-05	0	0	0	0	0	3.13184e-05	0	0	3.40315e-05	0	0	2.43978e-05	0	2.86581e-05	4.47691e-05	1.70601e-05	0
Sulfhydryl oxidase 1	QSOX1	O00391	5			0	2.49192e-05	0	0	7.19877e-05	2.93888e-06	0	0	0	0	0	0	0	0	0	0.000119323	0	0	0	0	0	0	0	5.75286e-07	0	0	0	0	0	0	0	0	1.85067e-05	9.85539e-07	0
Ras-related protein Rab-10	RAB10	P61026	4			0	1.78036e-05	0	0.000156866	0	3.79306e-05	0	2.40061e-05	0	0	2.99621e-05	0	2.37969e-05	7.37375e-05	0.000117826	8.03403e-05	0.000245045	0.000123634	1.69341e-05	0.000437572	1.93586e-06	0	0	3.4947e-06	0	5.24285e-05	0.00029848	0	1.23605e-05	3.42923e-05	0	4.09629e-05	4.79513e-05	2.6466e-05	0
Ras-related protein Rab-11A;Ras-related protein Rab-11B	RAB11A;RAB11B	P62491;Q15907	10			8.72397e-05	0.000117189	0	5.60374e-05	0.000198143	4.84582e-05	5.28621e-05	4.86802e-05	7.16103e-05	0	0.000183448	0	0	3.64164e-06	0	0.00015561	0.000214813	5.25346e-05	0.000188455	0	0.000130319	4.32047e-05	0.000179112	4.36528e-05	0.000179389	0.000443509	0.00011295	0	0.00017995	1.49776e-05	4.72338e-05	0	9.41277e-05	0.000431513	9.78667e-05
Ras-related protein Rab-14	RAB14	P61106	5			0	3.24581e-05	0	4.79513e-05	0	5.00754e-05	3.09113e-05	3.64835e-05	0	0	2.00974e-05	0	0	2.29355e-05	0	3.23399e-05	0	6.07908e-05	7.20508e-06	0	4.31439e-05	7.5103e-06	6.61687e-05	4.74642e-05	0	3.85784e-05	0	0	2.61534e-05	2.29637e-05	6.23364e-06	1.82967e-05	3.63446e-05	2.79426e-05	5.20202e-06
Ras-related protein Rab-18	RAB18	Q9NP72	2			0	0	0	0	0	0	0	5.57199e-06	0	0	0	0	0	0	0	0	0	0	0	0	0	0	3.19172e-06	0	0	0	0	0	0	0	0	0	0	0	0
Ras-related protein Rab-1A	RAB1A	P62820	15			0	0	0.000106085	5.79694e-05	0.000101668	0.000119614	0	2.13676e-05	0	0	8.84735e-05	0	0	3.14961e-05	0.000116587	0	5.69431e-05	1.35573e-05	8.56061e-05	0	0.000151769	0	0.000204092	0.000201879	0.000102914	0.000343365	0	0	0.000116697	3.85198e-05	4.7116e-05	0	6.02014e-05	0.000315216	0.00013382
Ras-related protein Rab-1B	RAB1B	Q9H0U4	12			0	0	0	6.12649e-05	0	4.91456e-05	0	2.65298e-05	0	0	1.12569e-06	0	2.41086e-05	0	0	0	0.000118078	0	0	0	6.10652e-05	0	9.44225e-05	1.71691e-05	0	0.000207536	0	0	7.05493e-05	6.98047e-05	0	0	5.08778e-06	0.000126462	3.06096e-05
Ras-related protein Rab-21	RAB21	Q9UL25	5			0	0	0	3.118e-05	0	1.31866e-05	2.76771e-05	0	0	0	8.32569e-06	0	0	2.69902e-05	0	0	0	0	0	0	0	0	4.01301e-05	1.2612e-05	0	2.37843e-05	0	0	0	2.35384e-05	0	0	1.45649e-05	1.91085e-05	0
Ras-related protein Rab-27A	RAB27A	P51159	7			0	0	0	2.36638e-05	0	0	0	0	0	0	0	0	0	0	0	0	0	0	1.28422e-05	0	5.59524e-06	0	0	0	0	5.06434e-05	0	0	2.47455e-05	0	2.19458e-05	0	0	9.13129e-06	0
Ras-related protein Rab-2A	RAB2A	P61019	4			0	1.5812e-05	0	3.21758e-05	0	2.38131e-05	0	0	0	0	3.19859e-05	0	0	0	0	0	0	0	1.86666e-05	0	5.70402e-05	0	3.05405e-05	4.63025e-05	0	6.27554e-05	0	0	4.70019e-05	3.06638e-05	1.27881e-05	0	0	0.000103337	1.7591e-05
Ras-related protein Rab-35	RAB35	Q15286	2			0	0	0	0	0	0	0	0	0	0	0	0	0	0	0	0	0	0	0	0	7.40553e-06	0	0	0	0	5.64807e-05	0	0	0	0	0	0	0	7.63111e-06	0
Ras-related protein Rab-3D;Ras-related protein Rab-3A	RAB3D;RAB3A	O95716;P20336	2			0	0	0	0	0	0	0	0	0	0	0	0	0	0	0	0	0	0	0	0	0	0	0	0	0	4.12739e-05	0	0	0	0	0	0	0	0	0
Ras-related protein Rab-5B	RAB5B	P61020	5			0	0	0	0	0	2.37324e-05	0	0	0	0	1.03099e-05	0	0	1.0677e-05	0	0	0	0	0	0	0	0	0	1.45751e-06	0	3.15495e-05	0	0	9.74847e-06	1.27731e-05	0	0	0	0	0
Ras-related protein Rab-5C	RAB5C	P51148	5			0	0	0	0	0	0	0	0	0	0	1.46144e-06	0	0	0	0	0	0	0	3.20775e-06	0	3.10681e-05	0	1.02917e-05	2.09145e-06	0	4.83763e-05	0	0	4.97324e-05	0	0	0	2.03682e-05	2.12939e-05	3.18604e-06
Ras-related protein Rab-6A	RAB6A	P20340	6			0	0	0	0	0	2.3891e-05	0	2.09147e-05	0	0	7.46573e-05	0	0	0	0	0	0	2.13024e-05	5.10665e-05	0	3.51373e-05	0	1.58e-05	1.88763e-05	0	0	0	0	6.80547e-05	0	0	0	0	4.08666e-05	0
Ras-related protein Rab-7a	RAB7A	P51149	7			0	0	0	2.4486e-05	0	1.48792e-05	0	2.26023e-05	0	0	8.51903e-05	0	0	0	0	0	0	0	6.91286e-05	0	9.38927e-05	1.06733e-05	0.000200237	8.39836e-05	0	0.000293092	4.08609e-05	3.03456e-05	0.000200126	0	5.50509e-05	0	2.00714e-05	0.000143696	2.44962e-05
Ras-related protein Rab-8A	RAB8A	P61006	5			0	0	0	0	0	0	0	0	0	0	1.05744e-05	0	0	0	0	0	0	0	0	0	1.15994e-05	0	2.05242e-05	0	0	8.93624e-05	0	0	0	0	0	0	5.79817e-06	1.10022e-06	1.4903e-05
Prenylated Rab acceptor protein 1	RABAC1	Q9UI14	2			0	0	0	0	0	0	0	0	0	0	0	0	0	0	0	0	0	0	0	0	0	0	0	0	0	9.65496e-06	0	0	0	0	0	0	3.76621e-05	0	0
Rab GTPase-binding effector protein 2	RABEP2	Q9H5N1	2			9.69471e-05	0	0	2.8294e-05	0	0	0	0	0	0	0	0	2.29299e-05	0	0	0	0	0	0	0	0	0	0	0	0	0	0	0	0	1.49093e-05	0	0	0	0	0
Rab GTPase-activating protein 1;Rab GTPase-activating protein 1-like, isoform 10	RABGAP1;RABGAP1L	Q9Y3P9;B7ZAP0	2			0	0	0	0	0	0	0	0	0	0	0	0	0	0	0	0	0	0	0	0	0	0	0	0	0	0	0	0	0	0	0	0	0	0	0
Geranylgeranyl transferase type-2 subunit beta	RABGGTB	P53611	1			0	0	0	0	0	0	0	0	0	0	0	0	0	0	0	0	0	0	0	0	0	0	0	0	0	0	0	0	0	0	0	0	0	0	0
Ras-related C3 botulinum toxin substrate 1;Ras-related C3 botulinum toxin substrate 2;Ras-related C3 botulinum toxin substrate 3	RAC1;RAC2;RAC3	P63000;P15153;P60763	4			0	0	0	0	0	0	0	0	0	0	1.32985e-05	0	0	0	0	0	0	0	0	0	0	0	1.66976e-05	6.47492e-06	0	0	0	0	0	0	0	0	0	1.96966e-05	0
UV excision repair protein RAD23 homolog A	RAD23A	P54725	4			0	0	0	0	0	0	0	0	0	0	0	0	0	0	0	0	0	0	0	0	0	0	0	0	0	0	0	0	0	0	0	0	0	0	0
UV excision repair protein RAD23 homolog B	RAD23B	P54727	13			0	0.000162142	0	0	0	4.63994e-05	0	3.49096e-05	0	0	0.000112616	0	0	0	0	0	0	3.1048e-05	0.000134499	0	0.000274223	2.43931e-05	0.00017388	0.000121473	0	0.000148527	0	0	6.52498e-05	3.98754e-05	3.51754e-05	0	8.42875e-05	0.000112668	0
Ras-related protein Ral-A	RALA	P11233	6			0	0	0	0	0	1.06525e-05	0	0	0	0	3.26071e-05	0	0	0	0	0	0	1.20845e-05	0.000100583	0	5.03383e-05	0	0.0002604	0	0	0.00017953	0	0	8.62766e-06	0	6.09472e-05	0	0	9.01262e-05	8.46558e-05
Ras-related protein Ral-B	RALB	P11234	5			0	5.1103e-05	0	8.89352e-05	6.57966e-05	5.42544e-05	3.77929e-05	2.75014e-05	0	0	2.105e-05	0	4.55248e-05	5.5807e-05	0	7.15305e-05	0	0	2.69857e-05	0	9.41578e-06	0	3.69788e-05	2.11271e-05	0	4.62431e-05	6.9938e-05	0	3.93175e-05	3.68306e-05	1.25103e-05	0	4.88842e-05	5.81168e-05	3.50959e-05
RNA-binding protein Raly	RALY	Q9UKM9	16			0	9.81395e-05	0	0.000234409	0.0001768	0.000347233	0.000196309	0.00057896	0.000355088	0	1.41739e-05	0	0.000139898	0.000122418	0	0.000113706	0.000368865	7.38943e-05	0.000141405	0	0.00018131	0	1.19568e-05	7.97137e-05	5.16216e-05	9.9774e-05	0.000286078	0	7.96602e-05	0.000340088	8.46696e-05	0.000106526	0.000205574	7.94144e-05	5.45854e-05
GTP-binding nuclear protein Ran	RAN	P62826	10			0	0.000255256	0.00015887	0.000141172	0.000386836	0.000207137	0.000437656	0.000173598	0.00012331	0	0.000268003	0.000184731	8.60547e-05	0	0	4.84315e-05	0.000135847	0.000124061	0.000281404	0	0.000258171	0.00014585	0.000498105	0.000328852	0	0.00024958	0.000137418	4.2572e-05	7.49014e-05	0	0.000265067	7.64181e-05	0.000319115	0.000326043	0.000233906
Ran-specific GTPase-activating protein	RANBP1	P43487	3			0.000226096	0	0	2.8506e-05	0	2.55642e-05	0	0.000137737	0.000257096	0	2.50957e-05	0	0.000104476	0	0	0	0.000182146	0.000130827	0	0.000207586	2.40697e-05	0	0	9.2861e-06	0	9.77211e-06	0.000176991	0	1.72477e-05	7.36509e-05	0	9.81601e-05	5.64329e-05	1.54071e-05	0
E3 SUMO-protein ligase RanBP2	RANBP2	P49792	2			0	0	0	0	0	0	0	0	0	0	0	0	0	0	0	0	0	0	0	0	0	0	0	0	0	0	0	0	0	0	0	0	0	0	0
Ran-binding protein 3	RANBP3	Q9H6Z4	1			0	0	0	0	0	0	0	0	0	0	0	0	0	0	0	0	0	0	0	0	0	0	0	0	0	0	0	0	0	0	0	0	0	0	0
Ran GTPase-activating protein 1	RANGAP1	P46060	1			0	0	0	0	0	0	0	0	0	0	0	0	0	0	0	0	0	0	0	0	0	0	0	0	0	0	0	0	0	0	0	0	1.21624e-05	0	0
Ras-related protein Rap-1A	RAP1A	P62834	8			0	0	0	0	0	0	0	0	0	0	0	0	0	0	0	0	0	0	0	0	8.46938e-06	0	0	8.06138e-06	0	0	0	0	0	0	0	0	0	0	0
[truncated: 547 more rows]
